# Supplementary material for: Serine protease NAL1 exerts pleiotropic functions through degradation of TOPLESS-related corepressor in rice
Source: Research Square preprint supplement (doi:10.21203/rs.3.rs-1892822/v1), 2022-08-01
Supplement: Supplementary file 1 [file 1018acae6d4a2e3d93bce88e.xlsx]

## Sheet: Extended data Table 5
Extended data Table 5 Primers used in this study.
Primer name	Primer sequence (5′-3′)	Usage
NAL1-189-5	GCCCAGGCCTACTAGTGGATCCATGAAGCCTTCGGACGATAAG	BiFC and Co-IP assays
NAL1-189-3	GCCCAGGCCTACTAGTGGATCCTCATTTCTCCAGGTCAAGGCT
TPR2.1-154-5	TCTTGGGCCCAGGCCTACTAGTATGTCGTCGCTTAGCAGGGAG
TPR2.3402-154-3	GAAATTCGAGCTCCTACCCGGGTCAGACTTCTGGTTTGTTAGC
TPR2.691-154-5	TCTTGGGCCCAGGCCTACTAGTATGTTTCCTCCAATGGGTGCTCA
TPR2.690-154-3	GAAATTCGAGCTCCTACCCGGGTTATGCAGCTGACTTAGGGATTG
TPR1-Nluc-5	CGGCGCGCCACTAGTGTCGACATGTCGTCGCTCAGCCGGGA	LCI assays
TPR1-Nluc-3	CGCGTACGAGATCTGGTCGACTCTTTGGATTTGGTCTGCAG
TPR3-Nluc-5	CGGCGCGCCACTAGTGTCGACATGTCGTCGCTGAGCCGGGAG
TPR3-Nluc-3	CGCGTACGAGATCTGGTCGACTCTTTCTGGTTGATCAGAAC
NAL1-Cluc-5	TACGCGTCCCGGGGCGGTACCATGAAGCCTTCGGACGATAAG
NAL1-Cluc-3	ACGAAAGCTCTGCAGGTCGACTCATTTCTCCAGGTCAAGGCT
TPR2.1-Nluc-5	CGGCGCGCCACTAGTGTCGAC ATGTCGTCGCTTAGCAGGGAG
TPR2.3402-Nluc-3	CGCGTACGAGATCTGGTCGACGACTTCTGGTTTGTTAGC
TPR2.691-Nluc-5	CGGCGCGCCACTAGTGTCGAC ATGTTTCCTCCAATGGGTGCTCA
TPR2.690-Nluc-3	CGCGTACGAGATCTGGTCGACTGCAGCTGACTTAGGGATTG
TPR2.2193-Nluc-3	CGCGTACGAGATCTGGTCGACGCTAACATCCATGGGCGCCAG
TPR2.2194-Nluc-5	CGGCGCGCCACTAGTGTCGACATGAGAACCCCAGATGTTAAG
TPR2-pET32a-5	CCATGGCTGATATCGGATCCATGTCGTCGCTTAGCAGGGAG	protein expression and purified
TPR2-pET32a-3	TGGTGGTGGTGGTGCTCGAGGACTTCTGGTTTGTTAGC
TPR2.691-pET32a-5	CCATGGCTGATATCGGATCCATGTTTCCTCCAATGGGTGCTCA
TPR2.690-pET32a-3	TGGTGGTGGTGGTGCTCGAGTGCAGCTGACTTAGGGATTG
NAL1-pGEX6P-5	GCCCCTGGGATCCCCGGAATTCATGAAGCCTTCGGACGATAAG
NAL1-pGEX6P-3	CAGTCAGTCACGATGCGGCCGCTCATTTCTCCAGGTCAAGGCT
ARF25-pGEX6P-5	GCCCCTGGGATCCCCGGAATTCATGAAGCTCTCTCCGCCGGCGT
ARF25-pGEX6P-3	CAGTCAGTCACGATGCGGCCGCTCAGTAGTCCAGAGGCGCTACAG
IAA3-pET32a-5	CCATGGCTGATATCGGATCCATGTCGCCGCCCCTCGAGCT
IAA3-pET32a-3	TGGTGGTGGTGGTGCTCGAGGTTCCTGTTCTTGGACTTTTc
IAA17-pET32a-5	CCATGGCTGATATCGGATCCATGTCGCCCCCACTCGAGCT
IAA17-pET32a-3	TGGTGGTGGTGGTGCTCGAGGTTGCGGTTTTTGGACTTAT
D53-pET21-5	AAGAAGGAGATATACATATGATGCCCACTCCGGTGGCCGCCGCGA
D53-pET21-3	TGGTGATGGTGATGCTCGAGACAATCTAGAATTATTCTTGG
IPA1-pGEX6P-5	GCCCCTGGGATCCCCGGAATTC ATGGAGATGGCCAGTGGAGG
IPA1-pGEX6P-3	CAGTCAGTCACGATGCGGCCGC CTACAGAGACCAATCCATCG
NAL1-F	GGTTCGCAAACTGTTCAGCACAGGTACCATGAAGCCTTCGGACGATAAG	complementary lines construction
NAL1-F	TTCAGAACCAGCACTTTTTGCACTGGATCCTCATTTCTCCAGGTCAAGGCT
TaNAL1-F	GGTTCGCAAACTGTTCAGCACAGGTACCATGAGGCCTTCAGATGACAG
TaNAL1-R	TTCAGAACCAGCACTTTTTGCACTGGATCCTCATTTCTCCAGGTCTATGC
ZmNAL1-F	GGTTCGCAAACTGTTCAGCACAGGTACCATGAGGCCTTCAGATGGCAG
ZmNAL1-R	TTCAGAACCAGCACTTTTTGCACTGGATCCTCACTTCTCCAGGTCAAGCT
BnNAL1-F	GGTTCGCAAACTGTTCAGCACAGGTACCATGACTTTGGGAGGTTGGGG
BnNAL1-R	TTCAGAACCAGCACTTTTTGCACTGGATCCTCAGCTAATAAAAAACTTTG
GmNAL1-F	GGTTCGCAAACTGTTCAGCACAGGTACCATGAATCAGAATCGATTGGA
GmNAL1-R	TTCAGAACCAGCACTTTTTGCACTGGATCCTTACTTTAATTCTTTGATGC
RNAiTPR2-F	GGGGACAAGTTTGTACAAAAAAGCAGGCTTC CAGCAAATCGTTCTGGTGCT	OsTPR2 RNAi line construction
RNAiTPR2-R	GGGGACCACTTTGTACAAGAAAGCTGGGTC GACTTCTGGTTTGTTAGCTG
qOsTPR2-F	AATTGGAGTCTTCGAAGCAGAG	RT-qPCR
qOsTPR2-R	ACAACCATGGGGTAAACACTTC
qOsPIN1b-F	TGCACCCTAGCATTCTCAGCA
qOsPIN1b-R	CCCTCCTCCCAAATTCTACTTC
qOsERF3-F	TGAGGCTGGATACCGTATGATG
qOsERF3-R	ACGAGGAGTCGGAGTCACTTTG
qOsCKX4-F	TTCAGCACCATCATCCTCAG
qOsCKX4-R	GTGTTTCCTCCGTTCAAATG
qDEP1-F	GCCGCGAGATCACGTTCCT
qDEP1-R	ATCCAGAACGAGAAACGGGCT
qOsCKX9-F	CTATCCTCAGCACTTGGCCC
qOsCKX9-R	AAATGGGACTGCCACTCCTG
qSLR1-F	ATCGGGCTTACGGTTCTCG
qSLR1-R	TGGGCTAGGAGGACCAAGGAA
qDL-F	CCCATCTGCTTACAACCGCTT
qDL-R	GTTGGAGGTGGAAACCGTCG
qACL1-F	CTGAAGCTGAACCTCTCGCTG
qACL1-R	GGAGCATGACGTAGATGAAGCAG
qUbi-F	CTGTCAACTGCCGCAAGAAG
qUbi-R	GGCGAGTGACGCTCTAGTTC
chip-OsERF3-1f	TGACCCTGCCAAGAAGAG	ChIP-qPCR
chip-OsERF3-1r	ACCGTGCTATTGCTGCTG
chip-OsERF3-2f	CAGCAGCAATAGCACGGTA
chip-OsERF3-2r	CTGAAAGGAAAGCGAACG
chip-OsPIN1b-1f	AAGAGCGTGATGGTCCACT
chip-OsPIN1b-1r	CTGCTGTCGTTCCACTTCA
chip-OsPIN1b-2f	GCCACAAACTTCTCCATTTC
chip-OsPIN1b-2r	TCGCCACTACCAATCTTCAT
chip-OsPIN1b-3f	CAACGAATGCCACAAGAAAG
chip-OsPIN1b-3r	ATCCTACACCGTCCGTAACC
chip-OsCKX4-1f	GCACACATACTTCAAGCCG
chip-OsCKX4-1r	ATCTCCCTGATGGCAACA
chip-OsCKX4-2f	CATAAACAGGACAGGCATCC
chip-OsCKX4-2r	AGCACTCTTCCATCCGACT
chip-OsCKX9-1f	ACATAGCCCGACAAACAAC
chip-OsCKX9-1r	ACAATGCCCACTTCTGGT
chip-OsCKX9-2f	TGAATAGCAGCCTGAGCCT
chip-OsCKX9-2r	GACCACATCCACATACACCA
chip-DEP1-1f	TGCCGTCATTTATTAGCCTC
chip-DEP1-1r	AGCGACCTTACACCATTCC
chip-DEP1-2f	GGAATGGTGTAAGGTCGCT
chip-DEP1-2r	CGTAACTATGTCTTCAACCGC
chip-DEP1-3f	AGACATAGTTACGCAGTGGTTC
chip-DEP1-3r	TCTCCGTCAAGATAGCAGC
chip-SLR1-1f	CGGTTGTGGTGGTTGACA
chip-SLR1-1r	CGAAGTAGGCAGCGACCTT
chip-SLR1-2f	TCTACGAGTCCTGCCCCTA
chip-SLR1-2r	TGCTTGATGCCGAAGTC
chip-ACTIN-f	TGCGTCAGGAATTCAGAACCA
chip-ACTIN-r	AGCACCACGAACCTTGACCAT
