# Supplementary material for: Serine protease NAL1 exerts pleiotropic functions through degradation of TOPLESS-related corepressor in rice
Source: Research Square preprint supplement (doi:10.21203/rs.3.rs-1892822/v1), 2022-08-01
Supplement: Supplementary file 2 [file 6d809b42b87b7f6b4440bb16.xlsx]

## Sheet: Extended data Table 4
Extended data Table 4 List of genes with significantly reduced expression and H3K18Ace levels in NAL1 mutants compared to wild types.
Gene ID	WT vs nal1				H3K18Ace ChIP
	WT	nal1	log2FoldChange	padj	seqnames	start	end	width	strand	Conc	Conc_ZH11_R_H3K18Ace	Conc_m331_R_H3K18Ace	Fold	p.value	FDR	annotation	geneChr	geneStart	geneEnd	geneLength	geneStrand	transcriptId	distanceToTSS	flank_txIds	flank_geneIds	flank_gene_distances	RAPdb_ID	Description	Gene_Symbol	Function_Keywords	Article_Title
LOC_Os01g01120	9028.48	5518.66	-0.71	3.275e-38	Chr1	62398	62898	501	*	6.42	7.06	5.24	1.82	0.000236	0.00206	Exon (LOC_Os01g01120.1/LOC_Os01g01120, exon 2 of 4)	1	62059	63576	1518	1	LOC_Os01g01120.1	339	LOC_Os01g01115.1;LOC_Os01g01120.1;LOC_Os01g01130.1	LOC_Os01g01115;LOC_Os01g01120;LOC_Os01g01130	3740;0;3404	Os01g0101200	enolase-phosphatase E1, putative, expressed
LOC_Os01g01650	331.351	107.021	-1.624	2.5e-20	Chr1	323284	323784	501	*	6.9	7.44	6.01	1.43	0.000529	0.00406	Exon (LOC_Os01g01650.1/LOC_Os01g01650, exon 1 of 2)	1	322556	323948	1393	2	LOC_Os01g01650.1	164	LOC_Os01g01640.1;LOC_Os01g01650.1	LOC_Os01g01640;LOC_Os01g01650	0;0	Os01g0106300	isoflavone reductase homolog IRL, putative, expressed
LOC_Os01g01870	185.064	116.243	-0.674	0.0007252	Chr1	478440	478940	501	*	5.66	6.35	4.29	2.06	0.000136	0.00129	5' UTR	1	478325	481166	2842	1	LOC_Os01g01870.1	115	LOC_Os01g01860.1;LOC_Os01g01870.1	LOC_Os01g01860;LOC_Os01g01870	-2130;0	Os01g0108600	helix-loop-helix DNA-binding domain containing protein, expressed
LOC_Os01g02060	62.255	18.031	-1.786	1.89e-06	Chr1	577009	577509	501	*	5.98	6.97	-0.14	7.11	1.07e-09	1.52e-07	Exon (LOC_Os01g02060.1/LOC_Os01g02060, exon 2 of 2)	1	576443	579569	3127	2	LOC_Os01g02060.1	2060	LOC_Os01g02060.1;LOC_Os01g02060.2	LOC_Os01g02060;LOC_Os01g02060	0;0	Os01g0110800	TOO MANY MOUTHS precursor, putative, expressed
LOC_Os01g02060	62.255	18.031	-1.786	1.89e-06	Chr1	581411	581911	501	*	6.09	6.67	5.08	1.59	0.000252	0.00218	Promoter (1-2kb)	1	576443	579569	3127	2	LOC_Os01g02060.2	-1842	LOC_Os01g02060.1;LOC_Os01g02060.2	LOC_Os01g02060;LOC_Os01g02060	0;0	Os01g0110800	TOO MANY MOUTHS precursor, putative, expressed
LOC_Os01g02060	62.255	18.031	-1.786	1.89e-06	Chr1	578862	579362	501	*	5.12	6.1	-0.14	6.24	3.82e-07	8.82e-06	5' UTR	1	576443	579569	3127	2	LOC_Os01g02060.1	207	LOC_Os01g02060.1;LOC_Os01g02060.2	LOC_Os01g02060;LOC_Os01g02060	0;0	Os01g0110800	TOO MANY MOUTHS precursor, putative, expressed
LOC_Os01g02900	746.194	429.515	-0.797	2.454e-13	Chr1	1057896	1058396	501	*	5.4	6.39	-0.14	6.53	3.12e-08	1.43e-06	Exon (LOC_Os01g02900.1/LOC_Os01g02900, exon 5 of 5)	1	1057137	1059856	2720	2	LOC_Os01g02900.1	1460	LOC_Os01g02900.1;LOC_Os01g02900.2	LOC_Os01g02900;LOC_Os01g02900	0;0	Os01g0118400	glycosyltransferase, putative, expressed
LOC_Os01g03180	67.768	34.407	-0.978	0.00622	Chr1	1247677	1248177	501	*	4.97	5.94	-0.14	6.09	8.08e-07	1.6e-05	Promoter (1-2kb)	1	1249881	1251448	1568	1	LOC_Os01g03180.1	-1704	LOC_Os01g03180.1	LOC_Os01g03180	0	Os01g0122000	retrotransposon protein, putative, unclassified, expressed
LOC_Os01g03730	766.715	365.393	-1.07	1.253e-23	Chr1	1564012	1564512	501	*	4.91	5.89	-0.14	6.03	1.96e-06	3.35e-05	Promoter (1-2kb)	1	1566138	1569472	3335	1	LOC_Os01g03730.1	-1626	LOC_Os01g03740.1;LOC_Os01g03730.1	LOC_Os01g03740;LOC_Os01g03730	0;-1626	Os01g0128200	nuclease PA3, putative, expressed
LOC_Os01g03950	3584.12	1928.2	-0.893	9.816e-35	Chr1	1698294	1698794	501	*	4.94	5.91	-0.14	6.05	2.1e-06	3.55e-05	Promoter (<=1kb)	1	1698203	1703090	4888	1	LOC_Os01g03950.1	91	LOC_Os01g03950.1	LOC_Os01g03950	0	Os01g0130400	glycosyl hydrolase, family 31, putative, expressed
LOC_Os01g03950	3584.12	1928.2	-0.893	9.816e-35	Chr1	1695372	1695872	501	*	6.15	6.97	4.04	2.94	3.53e-10	7.43e-08	Promoter (2-3kb)	1	1698203	1703090	4888	1	LOC_Os01g03950.1	-2331	LOC_Os01g03950.1	LOC_Os01g03950	0	Os01g0130400	glycosyl hydrolase, family 31, putative, expressed
LOC_Os01g04300	89.252	26.124	-1.769	3.902e-08	Chr1	1914808	1915308	501	*	5.32	6.27	1.54	4.73	1.36e-07	4.1e-06	Promoter (<=1kb)	1	1912561	1915094	2534	2	LOC_Os01g04300.1	0	LOC_Os01g04300.1	LOC_Os01g04300	0	Os01g0134900	glycosyl hydrolase family 10 protein, putative, expressed
LOC_Os01g04710	134.414	43.352	-1.636	3.044e-11	Chr1	2121283	2121783	501	*	6.58	7.09	5.79	1.3	0.00263	0.0147	Exon (LOC_Os01g04710.1/LOC_Os01g04710, exon 1 of 1)	1	2120381	2122366	1986	1	LOC_Os01g04710.1	902	LOC_Os01g04710.1	LOC_Os01g04710	0	Os01g0140100	aspartic proteinase, putative, expressed
LOC_Os01g04710	134.414	43.352	-1.636	3.044e-11	Chr1	2120392	2120892	501	*	5.54	6.52	-0.14	6.66	1.04e-08	6.8e-07	Promoter (<=1kb)	1	2120381	2122366	1986	1	LOC_Os01g04710.1	11	LOC_Os01g04710.1	LOC_Os01g04710	0	Os01g0140100	aspartic proteinase, putative, expressed
LOC_Os01g06280	748.988	425.498	-0.813	5.07e-13	Chr1	2983228	2983728	501	*	5.92	6.46	5.05	1.41	0.00744	0.0326	5' UTR	1	2982542	2986968	4427	1	LOC_Os01g06280.1	686	LOC_Os01g06280.2;LOC_Os01g06280.1;LOC_Os01g06290.3;LOC_Os01g06290.4;LOC_Os01g06290.2;LOC_Os01g06290.1	LOC_Os01g06280;LOC_Os01g06280;LOC_Os01g06290;LOC_Os01g06290;LOC_Os01g06290;LOC_Os01g06290	0;0;0;0;0;5518	Os01g0155500	TKL_IRAK_CrRLK1L-1.4 - The CrRLK1L-1 subfamily has homology to the CrRLK1L homolog, expressed
LOC_Os01g06580	48.976	21.517	-1.174	0.009503	Chr1	3097583	3098083	501	*	5.78	6.7	2.43	4.27	9.82e-07	1.87e-05	3' UTR	1	3097346	3098527	1182	2	LOC_Os01g06580.1	444	LOC_Os01g06570.1;LOC_Os01g06580.1;LOC_Os01g06590.1;LOC_Os01g06590.2;LOC_Os01g06590.3	LOC_Os01g06570;LOC_Os01g06580;LOC_Os01g06590;LOC_Os01g06590;LOC_Os01g06590	2373;0;7152;7152;7152	Os01g0159200	fasciclin domain containing protein, expressed
LOC_Os01g07420	65.023	31.939	-1.026	0.004474	Chr1	3518305	3518805	501	*	5.2	6.13	1.77	4.37	4.94e-06	7.28e-05	Exon (LOC_Os01g07420.1/LOC_Os01g07420, exon 1 of 4)	1	3516658	3519175	2518	2	LOC_Os01g07420.1	370	LOC_Os01g07410.1;LOC_Os01g07420.1;LOC_Os01g07430.1	LOC_Os01g07410;LOC_Os01g07420;LOC_Os01g07430	6470;0;0	Os01g0168800	hydrolase, alpha/beta fold family protein, putative, expressed
LOC_Os01g08110	57.21	29.462	-0.954	0.01459	Chr1	3924368	3924868	501	*	5.05	6.01	0.93	5.08	1.4e-06	2.54e-05	Promoter (<=1kb)	1	3924363	3926556	2194	1	LOC_Os01g08110.1	5	LOC_Os01g08100.1;LOC_Os01g08110.1;LOC_Os01g08120.1	LOC_Os01g08100;LOC_Os01g08110;LOC_Os01g08120	3012;0;0	Os01g0176200	flavonol-3-O-glycoside-7-O-glucosyltransferase 1, putative, expressed
LOC_Os01g08220	101.317	51.086	-0.981	0.0004743	Chr1	3996142	3996642	501	*	5.43	6.19	3.74	2.44	0.000151	0.00141	Distal Intergenic	1	4003659	4004946	1288	2	LOC_Os01g08220.1	8304	LOC_Os01g08200.1	LOC_Os01g08200	0	Os01g0177400	gibberellin 3-beta-dioxygenase 2-2, putative, expressed	d18|OsGA3ox2	ga |shoot|leaf|gibberellin|dwarf|stem|meristem|shoot apical meristem|GA biosynthetic|GA	Gibberellin is not a regulator of miR156 in rice juvenile-adult phase change|Cloning and functional analysis of two gibberellin 3 beta -hydroxylase genes that are differently expressed during the growth of rice|The rice GERMINATION DEFECTIVE 1, encoding a B3 domain transcriptional repressor, regulates seed germination and seedling development by integrating GA and carbohydrate metabolism|The mult…
LOC_Os01g08220	101.317	51.086	-0.981	0.0004743	Chr1	4003733	4004233	501	*	5.61	6.58	1.27	5.31	1.07e-09	1.52e-07	Exon (LOC_Os01g08220.1/LOC_Os01g08220, exon 2 of 2)	1	4003659	4004946	1288	2	LOC_Os01g08220.1	713	LOC_Os01g08220.1	LOC_Os01g08220	0	Os01g0177400	gibberellin 3-beta-dioxygenase 2-2, putative, expressed	d18|OsGA3ox2	ga |shoot|leaf|gibberellin|dwarf|stem|meristem|shoot apical meristem|GA biosynthetic|GA	Gibberellin is not a regulator of miR156 in rice juvenile-adult phase change|Cloning and functional analysis of two gibberellin 3 beta -hydroxylase genes that are differently expressed during the growth of rice|The rice GERMINATION DEFECTIVE 1, encoding a B3 domain transcriptional repressor, regulates seed germination and seedling development by integrating GA and carbohydrate metabolism|The mult…
LOC_Os01g08220	101.317	51.086	-0.981	0.0004743	Chr1	4004288	4004788	501	*	5.98	6.79	3.96	2.84	0.000374	0.00304	Exon (LOC_Os01g08220.1/LOC_Os01g08220, exon 1 of 2)	1	4003659	4004946	1288	2	LOC_Os01g08220.1	158	LOC_Os01g08220.1	LOC_Os01g08220	0	Os01g0177400	gibberellin 3-beta-dioxygenase 2-2, putative, expressed	d18|OsGA3ox2	ga |shoot|leaf|gibberellin|dwarf|stem|meristem|shoot apical meristem|GA biosynthetic|GA	Gibberellin is not a regulator of miR156 in rice juvenile-adult phase change|Cloning and functional analysis of two gibberellin 3 beta -hydroxylase genes that are differently expressed during the growth of rice|The rice GERMINATION DEFECTIVE 1, encoding a B3 domain transcriptional repressor, regulates seed germination and seedling development by integrating GA and carbohydrate metabolism|The mult…
LOC_Os01g09550	387.574	196.345	-0.982	2.099e-10	Chr1	4884073	4884573	501	*	6.44	7.07	5.27	1.81	0.0021	0.0123	5' UTR	1	4879207	4885790	6584	2	LOC_Os01g09550.2	1217	LOC_Os01g09550.1;LOC_Os01g09550.3;LOC_Os01g09550.4;LOC_Os01g09550.2	LOC_Os01g09550;LOC_Os01g09550;LOC_Os01g09550;LOC_Os01g09550	0;0;0;0	Os01g0191300	no apical meristem protein, putative, expressed	SNAC3|ONAC066	oxidative stress|drought|salinity|tolerance|transcription factor|oxidative|drought tolerance|salinity stress|stress|homeostasis|drought stress|abscisic acid|stress tolerance|stress response|reactive oxygen species|resistance| ABA |disease|salicylic acid|blast|disease resistance|nucleus|jasmonic|jasmonic acid|ABA| ja |blight|JA| sa |SA|pathogen|blast disease|bacterial blight|abiotic stress|biotic …	A stress-responsive NAC transcription factor SNAC3 confers heat and drought tolerance through modulation of reactive oxygen species in rice.|NAC transcription factor ONAC066 positively regulates disease resistance by suppressing the ABA signaling pathway in rice|Rice NAC transcription factor ONAC066 functions as a positive regulator of drought and oxidative stress response.
LOC_Os01g09770	163.634	101.427	-0.687	0.0009185	Chr1	5046571	5047071	501	*	5.72	6.38	4.49	1.89	0.000464	0.00364	Distal Intergenic	1	5037238	5040698	3461	2	LOC_Os01g09770.1	-5873				Os01g0194000	expressed protein
LOC_Os01g09770	163.634	101.427	-0.687	0.0009185	Chr1	5044589	5045089	501	*	6.41	7.07	5.17	1.9	1.04e-06	1.98e-05	Distal Intergenic	1	5037238	5040698	3461	2	LOC_Os01g09770.1	-3891				Os01g0194000	expressed protein
LOC_Os01g11130	19.74	6.36	-1.631	0.02292	Chr1	5957079	5957579	501	*	6.78	7.24	6.11	1.13	0.00114	0.00763	Promoter (2-3kb)	1	5945633	5954387	8755	2	LOC_Os01g11130.1	-2692	LOC_Os01g11130.1	LOC_Os01g11130	0	Os01g0209500	RNA recognition motif containing protein, putative, expressed
LOC_Os01g11160	762.04	455.716	-0.74	3.172e-11	Chr1	5983727	5984227	501	*	6.05	6.61	5.12	1.48	0.00366	0.0191	3' UTR	1	5983581	5985875	2295	2	LOC_Os01g11160.1	1648	LOC_Os01g11160.1	LOC_Os01g11160	0	Os01g0209800	amino acid permease family protein, putative, expressed
LOC_Os01g11340	270.126	141.63	-0.934	1.434e-08	Chr1	6080618	6081118	501	*	4.52	5.49	-0.14	5.63	0.000105	0.00103	Promoter (1-2kb)	1	6076688	6078711	2024	2	LOC_Os01g11340.1	-1907	LOC_Os01g11340.1	LOC_Os01g11340	0	Os01g0211600	cytochrome P450, putative, expressed
LOC_Os01g11340	270.126	141.63	-0.934	1.434e-08	Chr1	6078651	6079151	501	*	5.49	6.48	-0.14	6.62	4.06e-08	1.73e-06	Promoter (<=1kb)	1	6076688	6078711	2024	2	LOC_Os01g11340.1	0	LOC_Os01g11340.1	LOC_Os01g11340	0	Os01g0211600	cytochrome P450, putative, expressed
LOC_Os01g11620	257.75	121.095	-1.087	4.346e-10	Chr1	6267694	6268194	501	*	6.14	6.92	4.31	2.62	6.54e-06	9.28e-05	Exon (LOC_Os01g11620.1/LOC_Os01g11620, exon 1 of 5)	1	6267440	6270903	3464	1	LOC_Os01g11620.2	254	LOC_Os01g11620.1;LOC_Os01g11620.2	LOC_Os01g11620;LOC_Os01g11620	0;0	Os01g0214600	GDSL-like lipase/acylhydrolase, putative, expressed
LOC_Os01g11620	257.75	121.095	-1.087	4.346e-10	Chr1	6270203	6270703	501	*	5.44	6.12	4.15	1.97	0.00335	0.0178	3' UTR	1	6267440	6270903	3464	1	LOC_Os01g11620.2	2763	LOC_Os01g11620.1;LOC_Os01g11620.2	LOC_Os01g11620;LOC_Os01g11620	0;0	Os01g0214600	GDSL-like lipase/acylhydrolase, putative, expressed
LOC_Os01g11810	236.857	122.553	-0.945	1.941e-07	Chr1	6387857	6388357	501	*	6.24	6.67	5.62	1.05	0.00803	0.0345	3' UTR	1	6387705	6390998	3294	2	LOC_Os01g11810.2	2641	LOC_Os01g11810.1;LOC_Os01g11810.2	LOC_Os01g11810;LOC_Os01g11810	0;0	Os01g0217000	powdery mildew resistant protein 5, putative, expressed
LOC_Os01g12750	914.266	546.731	-0.743	6.273e-14	Chr1	7054607	7055107	501	*	5.51	6.2	4.18	2.02	0.00294	0.016	Intron (LOC_Os01g12750.1/LOC_Os01g12750, intron 1 of 1)	1	7053100	7056375	3276	1	LOC_Os01g12750.1	1507	LOC_Os01g12750.1	LOC_Os01g12750	0	Os01g0227500	cytochrome P450, putative, expressed
LOC_Os01g12810	920.205	558.461	-0.718	3.144e-14	Chr1	7093242	7093742	501	*	6.21	6.81	5.14	1.67	0.00328	0.0175	Exon (LOC_Os01g12810.3/LOC_Os01g12810, exon 4 of 5)	1	7092033	7095317	3285	1	LOC_Os01g12810.4	1209	LOC_Os01g12810.1;LOC_Os01g12810.5;LOC_Os01g12810.3;LOC_Os01g12810.2;LOC_Os01g12810.4;LOC_Os01g12820.1	LOC_Os01g12810;LOC_Os01g12810;LOC_Os01g12810;LOC_Os01g12810;LOC_Os01g12810;LOC_Os01g12820	0;0;0;0;0;0	Os01g0228400	retrotransposon protein, putative, unclassified, expressed
LOC_Os01g12810	920.205	558.461	-0.718	3.144e-14	Chr1	7091926	7092426	501	*	6.54	7.05	5.77	1.27	0.00184	0.0111	Promoter (<=1kb)	1	7092032	7095317	3286	1	LOC_Os01g12810.3	0	LOC_Os01g12800.1;LOC_Os01g12810.1;LOC_Os01g12810.5;LOC_Os01g12810.3;LOC_Os01g12810.2;LOC_Os01g12810.4;LOC_Os01g12820.1	LOC_Os01g12800;LOC_Os01g12810;LOC_Os01g12810;LOC_Os01g12810;LOC_Os01g12810;LOC_Os01g12810;LOC_Os01g12820	-2732;0;0;0;0;0;0	Os01g0228400	retrotransposon protein, putative, unclassified, expressed
LOC_Os01g14670	3373.5	1264.22	-1.416	3.378e-102	Chr1	8206548	8207048	501	*	5.24	5.99	3.6	2.39	0.0125	0.0477	Promoter (<=1kb)	1	8203765	8206969	3205	2	LOC_Os01g14670.1	0	LOC_Os01g14670.1	LOC_Os01g14670	0	Os01g0249200	Cupin domain containing protein, expressed
LOC_Os01g16450	63.226	21.223	-1.573	1.431e-05	Chr1	9340976	9341476	501	*	6.24	7.17	2.79	4.38	3.51e-08	1.56e-06	Exon (LOC_Os01g16450.1/LOC_Os01g16450, exon 2 of 2)	1	9339815	9342304	2490	1	LOC_Os01g16450.1	1161	LOC_Os01g16450.1	LOC_Os01g16450	0	Os01g0270300	peroxidase precursor, putative, expressed
LOC_Os01g16600	54.665	28.265	-0.961	0.01727	Chr1	9422289	9422789	501	*	6.48	6.97	5.74	1.23	0.00198	0.0118	Promoter (1-2kb)	1	9424556	9429196	4641	1	LOC_Os01g16600.1	-1767	LOC_Os01g16590.1;LOC_Os01g16600.1	LOC_Os01g16590;LOC_Os01g16600	0;0	Os01g0272600	expressed protein	OsRDN
LOC_Os01g17320	161.243	88.797	-0.864	0.0001585	Chr1	9961837	9962337	501	*	6.38	7.02	5.23	1.78	1.06e-05	0.000141	Promoter (<=1kb)	1	9962629	9966966	4338	1	LOC_Os01g17320.1	-292	LOC_Os01g17310.1;LOC_Os01g17320.1	LOC_Os01g17310;LOC_Os01g17320	-2987;-292	Os01g0280400	PPR repeat domain containing protein, putative, expressed
LOC_Os01g17470	360.893	142.085	-1.341	1.965e-19	Chr1	10049807	10050307	501	*	5.35	6.34	-0.14	6.48	4.94e-08	1.97e-06	Promoter (<=1kb)	1	10048264	10050309	2046	2	LOC_Os01g17470.1	2	LOC_Os01g17470.1;LOC_Os01g17470.2	LOC_Os01g17470;LOC_Os01g17470	0;0	Os01g0281600	plastocyanin-like domain containing protein, putative, expressed
LOC_Os01g18080	3001.31	1732.44	-0.793	1.197e-34	Chr1	10134050	10134550	501	*	5.87	6.76	3.15	3.6	0.000172	0.00157	5' UTR	1	10133857	10135806	1950	1	LOC_Os01g18080.1	193	LOC_Os01g18080.1;LOC_Os01g18090.1;LOC_Os01g18100.1	LOC_Os01g18080;LOC_Os01g18090;LOC_Os01g18100	0;0;0	Os01g0283300	retrotransposon protein, putative, unclassified, expressed
LOC_Os01g18080	3001.31	1732.44	-0.793	1.197e-34	Chr1	10131873	10132373	501	*	5.45	6.23	3.62	2.61	2.74e-05	0.000323	Promoter (1-2kb)	1	10133857	10135806	1950	1	LOC_Os01g18080.1	-1484	LOC_Os01g18080.1	LOC_Os01g18080	0	Os01g0283300	retrotransposon protein, putative, unclassified, expressed
LOC_Os01g18130	44.695	20.583	-1.11	0.02079	Chr1	10154591	10155091	501	*	7.23	7.79	6.29	1.5	8.11e-06	0.000111	Promoter (1-2kb)	1	10156418	10158682	2265	1	LOC_Os01g18130.1	-1327	LOC_Os01g18120.1;LOC_Os01g18130.1	LOC_Os01g18120;LOC_Os01g18130	0;0	None	expressed protein
LOC_Os01g18210	2081.31	1129.36	-0.884	4.576e-28	Chr1	10193640	10194140	501	*	5.12	6.1	-0.14	6.24	3.82e-07	8.82e-06	Promoter (<=1kb)	1	10193643	10196775	3133	1	LOC_Os01g18210.1	0	LOC_Os01g18210.1	LOC_Os01g18210	0	Os01g0284700	peptidyl-prolyl cis-trans isomerase, putative, expressed
LOC_Os01g19220	33.915	12.915	-1.402	0.01785	Chr1	10871375	10871875	501	*	5.88	6.74	3.38	3.36	0.000695	0.00509	Promoter (<=1kb)	1	10871371	10874265	2895	1	LOC_Os01g19220.1	4	LOC_Os01g19220.1	LOC_Os01g19220	0	Os01g0296700	beta-D-xylosidase, putative, expressed
LOC_Os01g19529	8.785	1.536	-2.511	0.04967	Chr1	11083127	11083627	501	*	6.69	7.21	5.84	1.37	0.000129	0.00123	Promoter (<=1kb)	1	11078199	11083482	5284	2	LOC_Os01g19529.1	0	LOC_Os01g19529.1	LOC_Os01g19529	0	Os01g0301500	pentatricopeptide, putative, expressed
LOC_Os01g19670	112.064	59.48	-0.916	0.0004896	Chr1	11155163	11155663	501	*	5.87	6.73	3.41	3.32	2e-08	1.05e-06	Promoter (<=1kb)	1	11155313	11155780	468	1	LOC_Os01g19670.1	0	LOC_Os01g19670.1	LOC_Os01g19670	0	None	expressed protein
LOC_Os01g20894	23.968	9.47	-1.342	0.03734	Chr1	11667295	11667795	501	*	5.46	6.36	2.57	3.79	1.4e-07	4.2e-06	Promoter (<=1kb)	1	11667260	11667716	457	2	LOC_Os01g20894.1	0	LOC_Os01g20890.1;LOC_Os01g20894.1	LOC_Os01g20890;LOC_Os01g20894	4572;0	Os01g0310600	expressed protein
LOC_Os01g20894	23.968	9.47	-1.342	0.03734	Chr1	11670012	11670512	501	*	5.21	6.16	1.34	4.82	1.33e-07	4.03e-06	Promoter (2-3kb)	1	11667260	11667716	457	2	LOC_Os01g20894.1	-2296	LOC_Os01g20894.1	LOC_Os01g20894	0	Os01g0310600	expressed protein
LOC_Os01g20930	198.623	120.865	-0.716	0.0003867	Chr1	11690338	11690838	501	*	6.37	6.97	5.35	1.62	8.65e-05	0.00087	Exon (LOC_Os01g20930.1/LOC_Os01g20930, exon 2 of 2)	1	11688901	11690975	2075	1	LOC_Os01g20930.1	1437	LOC_Os01g20910.1;LOC_Os01g20920.1;LOC_Os01g20930.1;LOC_Os01g20940.1	LOC_Os01g20910;LOC_Os01g20920;LOC_Os01g20930;LOC_Os01g20940	3896;2350;0;-2971	Os01g0311400	RING-H2 finger protein, putative, expressed
LOC_Os01g21034	568.706	199.676	-1.512	2.919e-34	Chr1	11745076	11745576	501	*	6.21	6.68	5.51	1.17	0.00318	0.0171	Intron (LOC_Os01g21034.3/LOC_Os01g21034, intron 1 of 1)	1	11741908	11750709	8802	1	LOC_Os01g21034.1	3168	LOC_Os01g21034.2;LOC_Os01g21034.3;LOC_Os01g21034.1	LOC_Os01g21034;LOC_Os01g21034;LOC_Os01g21034	0;0;0	Os01g0312500	pectinesterase, putative, expressed
LOC_Os01g21520	212.452	127.342	-0.741	8.454e-05	Chr1	12031842	12032342	501	*	6.5	7.25	4.84	2.41	7.91e-10	1.25e-07	Promoter (<=1kb)	1	12031970	12032254	285	1	LOC_Os01g21520.1	0	LOC_Os01g21520.1;LOC_Os01g21530.1	LOC_Os01g21520;LOC_Os01g21530	0;-2627	Os01g0317500	esterase/lipase/thioesterase family protein, putative, expressed
LOC_Os01g21560	638.731	380.03	-0.75	3.197e-08	Chr1	12067709	12068209	501	*	6.57	7.12	5.68	1.44	0.0109	0.0433	Promoter (<=1kb)	1	12067684	12069113	1430	1	LOC_Os01g21560.1	25	LOC_Os01g21560.1	LOC_Os01g21560	0	Os01g0317800	esterase/lipase/thioesterase family protein, putative, expressed
LOC_Os01g22352	127.857	74.063	-0.79	0.001262	Chr1	12569293	12569793	501	*	6.51	7.17	5.24	1.93	0.000244	0.00212	3' UTR	1	12564283	12570032	5750	1	LOC_Os01g22352.1	5010	LOC_Os01g22352.1	LOC_Os01g22352	0	Os01g0327100	peroxidase precursor, putative, expressed
LOC_Os01g22640	328.321	109.227	-1.589	2.291e-23	Chr1	12730808	12731308	501	*	5.95	6.62	4.63	1.99	0.000339	0.0028	Promoter (2-3kb)	1	12734098	12738112	4015	1	LOC_Os01g22640.1	-2790	LOC_Os01g22630.1;LOC_Os01g22630.2;LOC_Os01g22640.1	LOC_Os01g22630;LOC_Os01g22630;LOC_Os01g22640	0;0;0	Os01g0329900	GDSL-like lipase/acylhydrolase, putative, expressed
LOC_Os01g27230	1457.12	802.33	-0.861	5.081e-26	Chr1	15185348	15185848	501	*	6.23	6.78	5.35	1.43	0.00163	0.0101	Exon (LOC_Os01g27230.1/LOC_Os01g27230, exon 3 of 3)	1	15185076	15188301	3226	2	LOC_Os01g27230.1	2453	LOC_Os01g27230.1	LOC_Os01g27230	0	Os01g0369900	12-oxophytodienoate reductase, putative, expressed
LOC_Os01g27590	23.87	0.286	-6.183	1.286e-05	Chr1	15391394	15391894	501	*	4.05	5.01	-0.14	5.15	0.000122	0.00117	5' UTR	1	15389732	15392073	2342	2	LOC_Os01g27590.1	179	LOC_Os01g27580.1;LOC_Os01g27590.1;LOC_Os01g27600.1	LOC_Os01g27580;LOC_Os01g27590;LOC_Os01g27600	0;0;0	Os01g0373400	transposon protein, putative, Pong sub-class, expressed
LOC_Os01g32350	2138.87	1298.75	-0.72	1.238e-21	Chr1	17744833	17745333	501	*	5.72	6.63	2.56	4.07	2.68e-05	0.000317	Promoter (1-2kb)	1	17746363	17751130	4768	1	LOC_Os01g32350.3	-1030	LOC_Os01g32330.1;LOC_Os01g32350.2;LOC_Os01g32350.1;LOC_Os01g32350.3	LOC_Os01g32330;LOC_Os01g32350;LOC_Os01g32350;LOC_Os01g32350	0;-1030;-1030;-1030	Os01g0507900	OsClp2 - Putative Clp protease homologue, expressed	OsClpP3
LOC_Os01g33070	28.312	9.638	-1.552	0.00696	Chr1	18176555	18177055	501	*	5.51	6.49	0.39	6.09	2.57e-09	2.72e-07	Promoter (<=1kb)	1	18176535	18177876	1342	1	LOC_Os01g33070.1	20	LOC_Os01g33060.1;LOC_Os01g33060.2;LOC_Os01g33070.1	LOC_Os01g33060;LOC_Os01g33060;LOC_Os01g33070	0;0;0	Os01g0514450	pentatricopeptide repeat protein PPR868-14, putative, expressed
LOC_Os01g33110	20.121	6.319	-1.66	0.03398	Chr1	18229298	18229798	501	*	6.6	7.15	5.72	1.43	7.97e-05	0.000811	Promoter (<=1kb)	1	18229321	18233091	3771	1	LOC_Os01g33110.1	0	LOC_Os01g33110.1	LOC_Os01g33110	0	Os01g0515300	receptor-like protein kinase 5 precursor, putative, expressed
LOC_Os01g33410	39.365	6.972	-2.495	1.514e-05	Chr1	18393470	18393970	501	*	6.52	7.06	5.63	1.43	5.63e-05	0.000599	Exon (LOC_Os01g33410.1/LOC_Os01g33410, exon 2 of 2)	1	18390223	18394131	3909	1	LOC_Os01g33410.1	3247	LOC_Os01g33410.1;LOC_Os01g33420.1	LOC_Os01g33410;LOC_Os01g33420	0;7729	Os01g0518400	transposon protein, putative, unclassified, expressed
LOC_Os01g36240	35.433	15.499	-1.201	0.02319	Chr1	20062253	20062753	501	*	5.78	6.42	4.61	1.8	0.00123	0.00807	Exon (LOC_Os01g36240.1/LOC_Os01g36240, exon 1 of 4)	1	20061961	20066530	4570	1	LOC_Os01g36240.1	292	LOC_Os01g36240.1	LOC_Os01g36240	0	Os01g0543100	peroxidase precursor, putative, expressed
LOC_Os01g36910	9.48	0	-5.812	0.000479	Chr1	20564214	20564714	501	*	5.83	6.77	2.29	4.47	6.42e-08	2.39e-06	Downstream (1-2kb)	1	20565869	20570030	4162	2	LOC_Os01g36910.1	5316	LOC_Os01g36910.1	LOC_Os01g36910	5316	None	transposon protein, putative, unclassified, expressed
LOC_Os01g37460	76.031	24.922	-1.617	1.509e-06	Chr1	20935666	20936166	501	*	6.08	6.73	4.88	1.86	1.75e-05	0.000218	Promoter (<=1kb)	1	20935789	20937446	1658	1	LOC_Os01g37460.1	0	LOC_Os01g37460.1;LOC_Os01g37470.1;LOC_Os01g37470.2	LOC_Os01g37460;LOC_Os01g37470;LOC_Os01g37470	0;5191;4917	Os01g0555100	zinc finger family protein, putative, expressed
LOC_Os01g37590	3120.17	1339.96	-1.22	9.746e-75	Chr1	21026171	21026671	501	*	6.73	7.2	6.03	1.17	0.000525	0.00403	Distal Intergenic	1	21038806	21041083	2278	1	LOC_Os01g37590.2	-12135				Os01g0556700	peptide transporter PTR2, putative, expressed
LOC_Os01g37920	798.961	413.73	-0.95	0.02876	Chr1	21240947	21241447	501	*	5.45	6.13	4.12	2.01	0.00374	0.0194	Downstream (<1kb)	1	21241628	21242888	1261	2	LOC_Os01g37920.1	1441	LOC_Os01g37920.1	LOC_Os01g37920	1441	None	expressed protein
LOC_Os01g40860	873.747	412.594	-1.082	5.453e-20	Chr1	23095646	23096146	501	*	5.51	6.35	3.29	3.06	3.43e-06	5.35e-05	Promoter (1-2kb)	1	23097256	23106303	9048	1	LOC_Os01g40860.1	-1110	LOC_Os01g40840.1;LOC_Os01g40840.2;LOC_Os01g40860.1	LOC_Os01g40840;LOC_Os01g40840;LOC_Os01g40860	4892;4892;-1110	Os01g0591000	aldehyde dehydrogenase, putative, expressed
LOC_Os01g41550	185.69	69.737	-1.41	4.72e-10	Chr1	23515995	23516495	501	*	5.79	6.77	-0.14	6.91	2.66e-09	2.78e-07	Exon (LOC_Os01g41550.1/LOC_Os01g41550, exon 1 of 1)	1	23515004	23516896	1893	1	LOC_Os01g41550.1	991	LOC_Os01g41540.1;LOC_Os01g41550.1	LOC_Os01g41540;LOC_Os01g41550	-2061;0	Os01g0598600	aspartic proteinase, putative, expressed
LOC_Os01g41710	728950	424414	-0.78	6.914e-37	Chr1	23610986	23611486	501	*	5.86	6.63	4.08	2.56	7.5e-06	0.000104	Exon (LOC_Os01g41720.1/LOC_Os01g41720, exon 7 of 7)	1	23607348	23608583	1236	1	LOC_Os01g41710.1	3638	LOC_Os01g41710.1;LOC_Os01g41720.1	LOC_Os01g41710;LOC_Os01g41720	0;0	Os01g0600900	chlorophyll A-B binding protein, putative, expressed	CAB2R
LOC_Os01g41810	339.124	220.047	-0.621	2.26e-05	Chr1	23675404	23675904	501	*	6.97	7.39	6.39	1.01	0.00637	0.029	Promoter (<=1kb)	1	23673292	23675869	2578	2	LOC_Os01g41810.1	0	LOC_Os01g41810.1	LOC_Os01g41810	0	Os01g0602400	cytochrome P450 72A1, putative, expressed
LOC_Os01g41810	339.124	220.047	-0.621	2.26e-05	Chr1	23673285	23673785	501	*	6.06	6.56	5.29	1.26	0.0105	0.0421	Exon (LOC_Os01g41810.1/LOC_Os01g41810, exon 4 of 4)	1	23673292	23675869	2578	2	LOC_Os01g41810.1	2084	LOC_Os01g41810.1	LOC_Os01g41810	0	Os01g0602400	cytochrome P450 72A1, putative, expressed
LOC_Os01g42294	23.602	7.842	-1.593	0.01137	Chr1	23978267	23978767	501	*	5.9	6.52	4.79	1.73	0.000268	0.0023	Intron (LOC_Os01g42294.1/LOC_Os01g42294, intron 1 of 1)	1	23975949	23982081	6133	2	LOC_Os01g42294.1	3314	LOC_Os01g42294.1	LOC_Os01g42294	0	Os01g0607900	inactive receptor kinase At2g26730 precursor, putative, expressed
LOC_Os01g42520	3341.64	991.326	-1.754	2.784e-143	Chr1	24179820	24180320	501	*	6.7	7.22	5.9	1.32	0.000165	0.00152	Promoter (<=1kb)	1	24181111	24184171	3061	1	LOC_Os01g42520.1	-791	LOC_Os01g42520.1	LOC_Os01g42520	0	Os01g0611000	expressed protein
LOC_Os01g43160	223.204	107.193	-1.061	7.126e-09	Chr1	24632468	24632968	501	*	5.09	6.07	-0.14	6.21	3.34e-07	8e-06	Downstream (<1kb)	1	24629270	24632332	3063	1	LOC_Os01g43160.1	3198	LOC_Os01g43160.1;LOC_Os01g43170.1;LOC_Os01g43170.2;LOC_Os01g43170.3	LOC_Os01g43160;LOC_Os01g43170;LOC_Os01g43170;LOC_Os01g43170	0;6308;6308;6308	Os01g0618900	polygalacturonase, putative, expressed
LOC_Os01g43160	223.204	107.193	-1.061	7.126e-09	Chr1	24628916	24629416	501	*	5.74	6.53	3.81	2.72	0.000133	0.00126	Promoter (<=1kb)	1	24629270	24632332	3063	1	LOC_Os01g43160.1	0	LOC_Os01g43160.1	LOC_Os01g43160	0	Os01g0618900	polygalacturonase, putative, expressed
LOC_Os01g43320	424.133	167.441	-1.337	1.631e-18	Chr1	24762177	24762677	501	*	6.23	6.78	5.35	1.43	0.000285	0.00242	3' UTR	1	24753699	24758859	5161	2	LOC_Os01g43320.1	-3318	LOC_Os01g43330.1	LOC_Os01g43330	0	Os01g0621200	transmembrane amino acid transporter protein, putative, expressed
LOC_Os01g43590	43.507	20.885	-1.072	0.02079	Chr1	24966528	24967028	501	*	7	7.49	6.26	1.23	0.00931	0.0385	Promoter (<=1kb)	1	24967398	24969047	1650	1	LOC_Os01g43590.2	-370	LOC_Os01g43590.2;LOC_Os01g43590.1	LOC_Os01g43590;LOC_Os01g43590	0;0	Os01g0625300	HSF-type DNA-binding domain containing protein, expressed
LOC_Os01g45140	293.82	152.488	-0.947	1.298e-09	Chr1	25615840	25616340	501	*	5.89	6.51	4.79	1.72	0.00343	0.0181	Promoter (<=1kb)	1	25615863	25617353	1491	1	LOC_Os01g45140.1	0	LOC_Os01g45140.1	LOC_Os01g45140	0	Os01g0638600	anthocyanin 3-O-beta-glucosyltransferase, putative, expressed
LOC_Os01g45200	176.648	97.486	-0.855	4.904e-05	Chr1	25647072	25647572	501	*	5.85	6.84	-0.14	6.98	2.56e-09	2.72e-07	Promoter (<=1kb)	1	25640719	25647224	6506	2	LOC_Os01g45200.1	0	LOC_Os01g45200.1	LOC_Os01g45200	0	Os01g0639200	cinnamoyl-CoA reductase-related, putative, expressed	Snl6
LOC_Os01g45250	132.687	75.205	-0.823	0.0005324	Chr1	25684119	25684619	501	*	4.8	5.77	-0.14	5.91	3.7e-06	5.71e-05	Distal Intergenic	1	25681570	25683076	1507	1	LOC_Os01g45250.1	2549	LOC_Os01g45250.1	LOC_Os01g45250	0	Os01g0639600	DUF1645 domain containing protein, putative, expressed
LOC_Os01g45360	1923.43	1082.41	-0.832	1.971e-25	Chr1	25749334	25749834	501	*	5.27	5.96	3.92	2.04	0.00255	0.0143	Exon (LOC_Os01g45360.1/LOC_Os01g45360, exon 1 of 3)	1	25748192	25750466	2275	2	LOC_Os01g45360.1	632	LOC_Os01g45350.1;LOC_Os01g45360.1;LOC_Os01g45370.1	LOC_Os01g45350;LOC_Os01g45360;LOC_Os01g45370	0;0;5949	Os01g0640700	membrane associated DUF588 domain containing protein, putative, expressed
LOC_Os01g45730	115.616	7.843	-3.874	1.053e-23	Chr1	25963832	25964332	501	*	5.97	6.51	5.09	1.43	0.00363	0.019	Promoter (2-3kb)	1	25960103	25961195	1093	2	LOC_Os01g45730.1	-2637	LOC_Os01g45730.1	LOC_Os01g45730	0	Os01g0645000	zinc finger C-x8-C-x5-C-x3-H type family protein, expressed
LOC_Os01g45730	115.616	7.843	-3.874	1.053e-23	Chr1	25963011	25963511	501	*	6.19	7	4.12	2.89	1.9e-10	4.81e-08	Promoter (1-2kb)	1	25960103	25961195	1093	2	LOC_Os01g45730.1	-1816	LOC_Os01g45730.1	LOC_Os01g45730	0	Os01g0645000	zinc finger C-x8-C-x5-C-x3-H type family protein, expressed
LOC_Os01g45750	2850.91	1654.48	-0.784	1.03e-31	Chr1	25972064	25972564	501	*	5.84	6.47	4.69	1.79	0.00264	0.0147	Promoter (<=1kb)	1	25973522	25980440	6919	1	LOC_Os01g45750.1	-958	LOC_Os01g45740.1;LOC_Os01g45750.1	LOC_Os01g45740;LOC_Os01g45750	0;-958	Os01g0645200	bile acid sodium symporter family protein, putative, expressed	Ossbf1	transporter|growth	The novel rice (Oryza sativa L.) gene OsSbf1 encodes a putative member of the Na+/bile acid symporter family
LOC_Os01g46260	11.395	0.601	-4.238	0.003399	Chr1	26306214	26306714	501	*	7.01	7.58	6.05	1.53	0.0025	0.0141	Promoter (<=1kb)	1	26306238	26307238	1001	1	LOC_Os01g46260.1	0	LOC_Os01g46260.1	LOC_Os01g46260	0	Os01g0651300	expressed protein
LOC_Os01g46350	153.985	73.031	-1.078	4.201e-07	Chr1	26373250	26373750	501	*	6.36	6.89	5.53	1.36	0.00175	0.0107	Exon (LOC_Os01g46350.1/LOC_Os01g46350, exon 1 of 5)	1	26368398	26374101	5704	2	LOC_Os01g46350.1	351	LOC_Os01g46340.1;LOC_Os01g46350.1	LOC_Os01g46340;LOC_Os01g46350	0;0	Os01g0652100	proteins of unknown function domain containing protein, expressed
LOC_Os01g46350	153.985	73.031	-1.078	4.201e-07	Chr1	26370508	26371008	501	*	6.29	6.82	5.43	1.39	0.0082	0.0351	Exon (LOC_Os01g46350.1/LOC_Os01g46350, exon 3 of 5)	1	26368398	26374101	5704	2	LOC_Os01g46350.1	3093	LOC_Os01g46340.1;LOC_Os01g46350.1	LOC_Os01g46340;LOC_Os01g46350	0;0	Os01g0652100	proteins of unknown function domain containing protein, expressed
LOC_Os01g46400	345.789	165.675	-1.059	1.949e-11	Chr1	26402120	26402620	501	*	6.4	6.94	5.52	1.41	0.00943	0.0389	Exon (LOC_Os01g46400.1/LOC_Os01g46400, exon 2 of 2)	1	26401559	26403496	1938	2	LOC_Os01g46400.1	876	LOC_Os01g46400.1	LOC_Os01g46400	0	Os01g0652800	expressed protein
LOC_Os01g46760	116.96	46.822	-1.321	1.199e-05	Chr1	26646151	26646651	501	*	5.05	5.81	3.39	2.42	0.0111	0.0439	Distal Intergenic	1	26652944	26658313	5370	1	LOC_Os01g46760.1	-6293				Os01g0656200	protein phosphatase 2C, putative, expressed
LOC_Os01g46800	49.676	16.424	-1.599	0.0001006	Chr1	26692176	26692676	501	*	6.33	6.89	5.41	1.47	0.000127	0.00121	Distal Intergenic	1	26687377	26688416	1040	2	LOC_Os01g46800.1	-3760				Os01g0656400	WRKY15, expressed
LOC_Os01g46800	49.676	16.424	-1.599	0.0001006	Chr1	26687292	26687792	501	*	6.13	6.84	4.68	2.16	0.00651	0.0295	Exon (LOC_Os01g46800.1/LOC_Os01g46800, exon 3 of 3)	1	26687377	26688416	1040	2	LOC_Os01g46800.1	624	LOC_Os01g46800.1	LOC_Os01g46800	0	Os01g0656400	WRKY15, expressed
LOC_Os01g46800	49.676	16.424	-1.599	0.0001006	Chr1	26696831	26697331	501	*	6.06	6.93	3.51	3.42	0.000401	0.00323	Downstream (1-2kb)	1	26687377	26688416	1040	2	LOC_Os01g46800.1	-8415	LOC_Os01g46810.1	LOC_Os01g46810	8827	Os01g0656400	WRKY15, expressed
LOC_Os01g47080	312.377	164.776	-0.922	2.631e-09	Chr1	26897004	26897504	501	*	6	6.46	5.31	1.16	0.0107	0.0425	Promoter (1-2kb)	1	26888393	26895732	7340	2	LOC_Os01g47080.1	-1272	LOC_Os01g47080.1	LOC_Os01g47080	-1272	Os01g0660300	pyruvate kinase, putative, expressed
LOC_Os01g47370	330.725	37.235	-3.158	1.897e-51	Chr1	27061257	27061757	501	*	5.63	6.31	4.29	2.02	0.00262	0.0146	Downstream (2-3kb)	1	27063892	27064167	276	2	LOC_Os01g47370.1	2410	LOC_Os01g47370.1	LOC_Os01g47370	2410	Os01g0663051	MYB family transcription factor, putative, expressed
LOC_Os01g47400	349.24	150.433	-1.215	1.433e-16	Chr1	27078489	27078989	501	*	6.38	7.1	4.89	2.22	0.00284	0.0156	Promoter (2-3kb)	1	27081806	27085681	3876	1	LOC_Os01g47400.1	-2817	LOC_Os01g47400.1;LOC_Os01g47400.2	LOC_Os01g47400;LOC_Os01g47400	0;0	Os01g0663300	OsMan01 - Endo-Beta-Mannanase, expressed
LOC_Os01g47400	349.24	150.433	-1.215	1.433e-16	Chr1	27084410	27084910	501	*	6.41	6.9	5.69	1.21	0.00454	0.0224	Exon (LOC_Os01g47400.1/LOC_Os01g47400, exon 3 of 4)	1	27081818	27085680	3863	1	LOC_Os01g47400.2	2592	LOC_Os01g47400.1;LOC_Os01g47400.2;LOC_Os01g47410.1;LOC_Os01g47410.2	LOC_Os01g47400;LOC_Os01g47400;LOC_Os01g47410;LOC_Os01g47410	0;0;7330;7330	Os01g0663300	OsMan01 - Endo-Beta-Mannanase, expressed
LOC_Os01g47400	349.24	150.433	-1.215	1.433e-16	Chr1	27081702	27082202	501	*	5.3	6.29	-0.14	6.43	3.71e-07	8.67e-06	Promoter (<=1kb)	1	27081806	27085681	3876	1	LOC_Os01g47400.1	0	LOC_Os01g47400.1;LOC_Os01g47400.2	LOC_Os01g47400;LOC_Os01g47400	0;0	Os01g0663300	OsMan01 - Endo-Beta-Mannanase, expressed
LOC_Os01g47780	35.274	7.555	-2.214	4.517e-05	Chr1	27339724	27340224	501	*	5.7	6.31	4.64	1.67	0.0109	0.0433	Downstream (<1kb)	1	27340899	27341950	1052	2	LOC_Os01g47780.1	1726	LOC_Os01g47770.1;LOC_Os01g47770.2;LOC_Os01g47780.1	LOC_Os01g47770;LOC_Os01g47770;LOC_Os01g47780	3464;3464;0	Os01g0668100	fasciclin domain containing protein, expressed
LOC_Os01g48130	327.26	162.012	-1.011	1.494e-11	Chr1	27556262	27556762	501	*	5.81	6.46	4.57	1.89	0.000309	0.00259	3' UTR	1	27556008	27560681	4674	2	LOC_Os01g48130.1	3919	LOC_Os01g48130.1;LOC_Os01g48130.2	LOC_Os01g48130;LOC_Os01g48130	0;0	Os01g0672100	no apical meristem protein, putative, expressed
LOC_Os01g48130	327.26	162.012	-1.011	1.494e-11	Chr1	27562464	27562964	501	*	7.34	7.85	6.54	1.3	0.00179	0.0109	Promoter (1-2kb)	1	27556008	27560681	4674	2	LOC_Os01g48130.2	-1783	LOC_Os01g48130.1;LOC_Os01g48130.2;LOC_Os01g48140.1	LOC_Os01g48130;LOC_Os01g48130;LOC_Os01g48140	0;0;0	Os01g0672100	no apical meristem protein, putative, expressed
LOC_Os01g48640	176.957	94.976	-0.904	1.805e-05	Chr1	27881110	27881610	501	*	5.72	6.54	3.68	2.86	0.0023	0.0132	Promoter (1-2kb)	1	27883020	27886068	3049	1	LOC_Os01g48640.1	-1410	LOC_Os01g48620.1;LOC_Os01g48640.1	LOC_Os01g48620;LOC_Os01g48640	0;0	Os01g0678100	expressed protein
LOC_Os01g50820	22.256	8.281	-1.429	0.02914	Chr1	29188633	29189133	501	*	5.9	6.65	4.25	2.4	0.000171	0.00157	Promoter (<=1kb)	1	29188850	29190965	2116	1	LOC_Os01g50820.1	0	LOC_Os01g50820.1;LOC_Os01g50830.2;LOC_Os01g50830.1	LOC_Os01g50820;LOC_Os01g50830;LOC_Os01g50830	0;-2701;-2859	Os01g0704100	transporter, major facilitator family, putative, expressed	OsNRT2.3	nitrate|transporter	Rice OsNAR2.1 interacts with OsNRT2.1, OsNRT2.2 and OsNRT2.3a nitrate transporters to provide uptake over high and low concentration ranges
LOC_Os01g50840	1749.16	728.796	-1.264	3.514e-49	Chr1	29204865	29205365	501	*	6.56	7.08	5.74	1.34	0.000545	0.00415	Promoter (1-2kb)	1	29202409	29203689	1281	2	LOC_Os01g50840.1	-1176	LOC_Os01g50840.1;LOC_Os01g50849.3;LOC_Os01g50849.1;LOC_Os01g50849.2	LOC_Os01g50840;LOC_Os01g50849;LOC_Os01g50849;LOC_Os01g50849	0;4242;4242;4242	Os01g0704300	expressed protein
LOC_Os01g50910	5.628	0.287	-4.156	0.03384	Chr1	29233828	29234328	501	*	7.04	7.69	5.83	1.86	0.00294	0.016	Promoter (<=1kb)	1	29233028	29234256	1229	2	LOC_Os01g50910.1	0	LOC_Os01g50890.1;LOC_Os01g50900.1;LOC_Os01g50910.1;LOC_Os01g50910.2	LOC_Os01g50890;LOC_Os01g50900;LOC_Os01g50910;LOC_Os01g50910	0;0;0;0	Os01g0705200	late embryogenesis abundant protein, group 3, putative, expressed	pwsi18|WSI18
LOC_Os01g51060	207.054	77.484	-1.417	1.829e-13	Chr1	29336608	29337108	501	*	6.09	6.66	5.12	1.54	0.0023	0.0133	Promoter (1-2kb)	1	29326689	29334795	8107	2	LOC_Os01g51060.1	-1813	LOC_Os01g51060.1	LOC_Os01g51060	0	Os01g0706900	hydrolase, putative, expressed
LOC_Os01g51060	207.054	77.484	-1.417	1.829e-13	Chr1	29334302	29334802	501	*	7.02	7.59	6.05	1.54	6.31e-06	8.98e-05	Promoter (<=1kb)	1	29326689	29334795	8107	2	LOC_Os01g51060.1	0	LOC_Os01g51060.1	LOC_Os01g51060	0	Os01g0706900	hydrolase, putative, expressed
LOC_Os01g51140	58.728	17.68	-1.733	1.794e-05	Chr1	29380681	29381181	501	*	6.63	7.18	5.74	1.44	0.00601	0.0278	Downstream (1-2kb)	1	29382708	29385646	2939	2	LOC_Os01g51140.1	4465	LOC_Os01g51140.2;LOC_Os01g51140.1	LOC_Os01g51140;LOC_Os01g51140	0;0	Os01g0707500	helix-loop-helix DNA-binding domain containing protein, expressed
LOC_Os01g51140	58.728	17.68	-1.733	1.794e-05	Chr1	29392597	29393097	501	*	5.14	6.12	-0.14	6.26	2.46e-07	6.44e-06	Distal Intergenic	1	29382534	29385653	3120	2	LOC_Os01g51140.2	-6944				Os01g0707500	helix-loop-helix DNA-binding domain containing protein, expressed
LOC_Os01g51360	9247.07	5163.5	-0.84	6.252e-40	Chr1	29531989	29532489	501	*	6.29	7.04	4.64	2.41	2.25e-07	6e-06	Exon (LOC_Os01g51360.1/LOC_Os01g51360, exon 1 of 2)	1	29529726	29532847	3122	2	LOC_Os01g51360.1	358	LOC_Os01g51360.1;LOC_Os01g51360.2;LOC_Os01g51370.2;LOC_Os01g51370.1	LOC_Os01g51360;LOC_Os01g51360;LOC_Os01g51370;LOC_Os01g51370	0;0;3676;3675	Os01g0710700	lipase, putative, expressed
LOC_Os01g51450	69.294	12.412	-2.479	2.701e-10	Chr1	29582977	29583477	501	*	7.01	7.61	5.99	1.62	7.48e-06	0.000104	Promoter (<=1kb)	1	29580715	29583174	2460	2	LOC_Os01g51450.1	0	LOC_Os01g51450.1;LOC_Os01g51460.1;LOC_Os01g51470.1	LOC_Os01g51450;LOC_Os01g51460;LOC_Os01g51470	0;0;0	Os01g0711800	NAP domain containing protein, putative, expressed	Orysa;NAP1;3|OsNAP1_L3
LOC_Os01g51840	98.727	40.181	-1.304	3.797e-06	Chr1	29808075	29808575	501	*	6.44	7.01	5.5	1.51	0.00169	0.0104	Promoter (1-2kb)	1	29801081	29806970	5890	2	LOC_Os01g51840.1	-1105	LOC_Os01g51840.1;LOC_Os01g51840.3;LOC_Os01g51840.2;LOC_Os01g51850.1	LOC_Os01g51840;LOC_Os01g51840;LOC_Os01g51840;LOC_Os01g51850	-1105;-1543;-1543;3893	Os01g0716200	IQ calmodulin-binding motif family protein, putative, expressed
LOC_Os01g52030	53.139	25.614	-1.047	0.01787	Chr1	29910897	29911397	501	*	5.95	6.75	4.04	2.71	0.0125	0.0477	Distal Intergenic	1	29904104	29904857	754	2	LOC_Os01g52030.1	-6040				Os01g0718000	zinc finger A20 and AN1 domain-containing stress-associated protein, putative, expressed
LOC_Os01g52030	53.139	25.614	-1.047	0.01787	Chr1	29909536	29910036	501	*	5.27	6.25	-0.14	6.39	1.22e-07	3.77e-06	Distal Intergenic	1	29904104	29904857	754	2	LOC_Os01g52030.1	-4679				Os01g0718000	zinc finger A20 and AN1 domain-containing stress-associated protein, putative, expressed
LOC_Os01g52170	3496.5	1998.38	-0.807	5.391e-40	Chr1	30005804	30006304	501	*	6.53	7.14	5.44	1.7	7.5e-06	0.000104	Promoter (1-2kb)	1	30008281	30012094	3814	1	LOC_Os01g52170.1	-1977	LOC_Os01g52160.1;LOC_Os01g52170.1	LOC_Os01g52160;LOC_Os01g52170	0;-1977	Os01g0719700	expressed protein
LOC_Os01g53160	194.22	70.793	-1.453	4.713e-10	Chr1	30542156	30542656	501	*	5.14	6.12	-0.14	6.26	2.87e-07	7.17e-06	Promoter (<=1kb)	1	30542800	30544190	1391	1	LOC_Os01g53160.1	-144	LOC_Os01g53150.1;LOC_Os01g53150.2;LOC_Os01g53160.1	LOC_Os01g53150;LOC_Os01g53150;LOC_Os01g53160	5021;5021;-144	Os01g0732300	DUF623 domain containing protein, expressed
LOC_Os01g53294	204.883	130.637	-0.653	0.0005994	Chr1	30622406	30622906	501	*	4.92	5.9	-0.14	6.04	1.06e-06	2e-05	Promoter (<=1kb)	1	30622671	30634405	11735	1	LOC_Os01g53294.1	0	LOC_Os01g53294.1	LOC_Os01g53294	0	Os01g0734200	respiratory burst oxidase protein B, putative, expressed	OsrbohA|Osrboh2	growth|pollen|seed|development|tolerance|fertility|stress|plasma membrane|stress response	The plasma membrane NADPH oxidase OsRbohA plays a crucial role in developmental regulation and drought-stress response in rice.
LOC_Os01g53330	434.692	283.679	-0.615	7.162e-05	Chr1	30648540	30649040	501	*	6.86	7.43	5.88	1.55	0.00494	0.024	Exon (LOC_Os01g53330.1/LOC_Os01g53330, exon 1 of 1)	1	30647512	30649347	1836	1	LOC_Os01g53330.1	1028	LOC_Os01g53330.1;LOC_Os01g53340.1	LOC_Os01g53330;LOC_Os01g53340	0;0	Os01g0734600	anthocyanidin 5,3-O-glucosyltransferase, putative, expressed
LOC_Os01g53350	244.685	70.373	-1.802	1.337e-18	Chr1	30656320	30656820	501	*	5.31	6.29	-0.14	6.43	7.47e-08	2.66e-06	Exon (LOC_Os01g53350.2/LOC_Os01g53350, exon 1 of 2)	1	30655289	30657194	1906	1	LOC_Os01g53350.1	1031	LOC_Os01g53350.1;LOC_Os01g53350.2;LOC_Os01g53360.1	LOC_Os01g53350;LOC_Os01g53350;LOC_Os01g53360	0;0;0	Os01g0734800	anthocyanidin 5,3-O-glucosyltransferase, putative, expressed
LOC_Os01g53590	8.163	0	-5.591	0.001098	Chr1	30770233	30770733	501	*	5.38	6.3	2.14	4.16	6.91e-06	9.7e-05	Promoter (<=1kb)	1	30770399	30773003	2605	1	LOC_Os01g53590.1	0	LOC_Os01g53580.1;LOC_Os01g53590.1	LOC_Os01g53580;LOC_Os01g53590	0;0	Os01g0737700	3-5 exonuclease domain-containing protein, putative, expressed
LOC_Os01g53590	8.163	0	-5.591	0.001098	Chr1	30772364	30772864	501	*	6.72	7.38	5.46	1.92	6.01e-07	1.26e-05	Exon (LOC_Os01g53590.1/LOC_Os01g53590, exon 2 of 2)	1	30770399	30773003	2605	1	LOC_Os01g53590.1	1965	LOC_Os01g53590.1;LOC_Os01g53600.1;LOC_Os01g53600.2	LOC_Os01g53590;LOC_Os01g53600;LOC_Os01g53600	0;0;0	Os01g0737700	3-5 exonuclease domain-containing protein, putative, expressed
LOC_Os01g53810	202.882	102.139	-0.989	1.258e-07	Chr1	30936466	30936966	501	*	5.62	6.45	3.45	3.01	0.00621	0.0285	Exon (LOC_Os01g53810.1/LOC_Os01g53810, exon 1 of 12)	1	30933234	30937375	4142	2	LOC_Os01g53810.1	409	LOC_Os01g53810.1	LOC_Os01g53810	0	Os01g0740600	peptidase, putative, expressed
LOC_Os01g54210	60.321	25.481	-1.245	0.0006701	Chr1	31176028	31176528	501	*	4.42	5.39	-0.14	5.53	1.97e-05	0.000242	Distal Intergenic	1	31180196	31182456	2261	2	LOC_Os01g54210.1	5928				Os01g0745700	GATA zinc finger domain containing protein, expressed
LOC_Os01g54540	10680.6	5621.26	-0.926	1.59e-45	Chr1	31366160	31366660	501	*	6.66	7.44	4.86	2.58	5.29e-07	1.14e-05	Promoter (<=1kb)	1	31367015	31369416	2402	1	LOC_Os01g54540.1	-355	LOC_Os01g54530.1;LOC_Os01g54540.1;LOC_Os01g54540.2	LOC_Os01g54530;LOC_Os01g54540;LOC_Os01g54540	3526;-355;-355	Os01g0749200	ribosomal protein L13, putative, expressed	WLP1	photosynthesis|chloroplast|panicle|leaf|seedling|temperature	The rice nuclear gene WLP1 encoding a chloroplast ribosome L13 protein is needed for chloroplast development in rice grown under low temperature conditions
LOC_Os01g55190	73.106	18.795	-1.951	6.858e-08	Chr1	31753479	31753979	501	*	5.78	6.66	3.15	3.51	0.000316	0.00263	Distal Intergenic	1	31749149	31753374	4226	1	LOC_Os01g55190.1	4330	LOC_Os01g55190.1	LOC_Os01g55190	4330	Os01g0756600	expressed protein
LOC_Os01g56370	84.78	28.521	-1.579	9.582e-07	Chr1	32488018	32488518	501	*	5.92	6.91	-0.14	7.05	3.22e-10	6.82e-08	Exon (LOC_Os01g56370.1/LOC_Os01g56370, exon 3 of 7)	1	32484736	32489971	5236	2	LOC_Os01g56370.1	1453	LOC_Os01g56370.1	LOC_Os01g56370	0	Os01g0770100	wax synthase, putative, expressed
LOC_Os01g56810	35.263	9.267	-1.923	0.0007859	Chr1	32791318	32791818	501	*	6.57	7.15	5.57	1.58	4.33e-05	0.000478	Exon (LOC_Os01g56810.1/LOC_Os01g56810, exon 2 of 5)	1	32788487	32792750	4264	2	LOC_Os01g56810.1	932	LOC_Os01g56810.2;LOC_Os01g56810.1	LOC_Os01g56810;LOC_Os01g56810	0;0	Os01g0775400	cytokinin dehydrogenase precursor, putative, expressed
LOC_Os01g58420	112.365	43.71	-1.361	2.654e-06	Chr1	33767131	33767631	501	*	5.06	6.04	-0.14	6.18	3.24e-06	5.1e-05	Exon (LOC_Os01g58420.1/LOC_Os01g58420, exon 1 of 1)	1	33766979	33768085	1107	1	LOC_Os01g58420.1	152	LOC_Os01g58420.1;LOC_Os01g58430.1	LOC_Os01g58420;LOC_Os01g58430	0;-2530	Os01g0797600	AP2 domain containing protein, expressed	AP37|OsERF3	drought|stem|salinity|transcription factor| ABA |temperature|ethylene|growth|defense|grain|yield|insect|jasmonate|grain yield|brown planthopper|defense response|vegetative|drought tolerance|salt|crown root development|root development|root|auxin|cytokinin|crown root elongation|root elongation|crown root initiation|root initiation	Overexpression of the Transcription Factor AP37 in Rice Improves Grain Yield under Drought Conditions|An EAR-motif-containing ERF transcription factor affects herbivore-induced signaling, defense and resistance in rice|Isolation and identification of an AP2/ERF factor that binds an allelic cis-element of rice gene LRK6|EAR motif mutation of rice OsERF3 alters the regulation of ethylene biosynthes…
LOC_Os01g58470	3214.76	2116.34	-0.603	4.161e-17	Chr1	33805995	33806495	501	*	5.73	6.49	4.04	2.45	0.0047	0.0231	Distal Intergenic	1	33803154	33805393	2240	1	LOC_Os01g58470.1	2841	LOC_Os01g58470.1	LOC_Os01g58470	2841	Os01g0798500	expressed protein
LOC_Os01g59020	146.717	59.973	-1.286	5.035e-08	Chr1	34115955	34116455	501	*	7.04	7.56	6.23	1.34	9.66e-05	0.000957	Exon (LOC_Os01g59020.1/LOC_Os01g59020, exon 1 of 1)	1	34115002	34116761	1760	1	LOC_Os01g59020.1	953	LOC_Os01g59009.1;LOC_Os01g59020.1;LOC_Os01g59030.1	LOC_Os01g59009;LOC_Os01g59020;LOC_Os01g59030	2946;0;-1078	Os01g0804400	cytochrome P450, putative, expressed
LOC_Os01g59110	109.552	70.47	-0.631	0.04252	Chr1	34146320	34146820	501	*	5.7	6.69	-0.14	6.83	2.57e-09	2.72e-07	Exon (LOC_Os01g59110.1/LOC_Os01g59110, exon 1 of 2)	1	34146161	34149193	3033	1	LOC_Os01g59110.1	159	LOC_Os01g59100.1;LOC_Os01g59110.1;LOC_Os01g59120.1	LOC_Os01g59100;LOC_Os01g59110;LOC_Os01g59120	0;0;5597	Os01g0805500	indole-3-acetate beta-glucosyltransferase, putative, expressed
LOC_Os01g59840	1006.58	645.338	-0.641	2.752e-11	Chr1	34610661	34611161	501	*	5.31	6.25	1.74	4.51	3.89e-06	5.93e-05	Promoter (<=1kb)	1	34605755	34610973	5219	2	LOC_Os01g59840.1	0	LOC_Os01g59840.1;LOC_Os01g59850.1	LOC_Os01g59840;LOC_Os01g59850	0;0	Os01g0813800	Os1bglu3 - beta-glucosidase homologue, similar to G. max isohydroxyurate hydrolase, expressed
LOC_Os01g60810	155.403	102.719	-0.597	0.006796	Chr1	35170276	35170776	501	*	5.95	6.68	4.4	2.28	0.000124	0.00119	Promoter (<=1kb)	1	35167600	35169295	1696	2	LOC_Os01g60810.1	-981	LOC_Os01g60810.1;LOC_Os01g60820.1	LOC_Os01g60810;LOC_Os01g60820	0;2194	Os01g0823500	DUF623 domain containing protein, expressed	OsOFP6	root|growth|grain|drought|tolerance|cold stress|drought tolerance|auxin|stress|iaa|auxin transport|lateral root|water loss|IAA	Rice OVATE family protein 6 regulates plant development and confers resistance to drought and cold stresses.
LOC_Os01g61320	110.85	62.634	-0.824	0.001877	Chr1	35477447	35477947	501	*	5.22	6.2	-0.14	6.34	3.14e-07	7.65e-06	Promoter (<=1kb)	1	35477413	35479577	2165	1	LOC_Os01g61320.1	34	LOC_Os01g61320.1;LOC_Os01g61320.2;LOC_Os01g61330.1	LOC_Os01g61320;LOC_Os01g61320;LOC_Os01g61330	0;0;0	Os01g0829000	thioredoxin, putative, expressed
LOC_Os01g61370	46.956	14.019	-1.742	0.0001342	Chr1	35497360	35497860	501	*	6.79	7.48	5.41	2.06	0.00107	0.00725	Exon (LOC_Os01g61370.1/LOC_Os01g61370, exon 1 of 1)	1	35496868	35498571	1704	2	LOC_Os01g61370.1	711	LOC_Os01g61360.1;LOC_Os01g61370.1;LOC_Os01g61380.1	LOC_Os01g61360;LOC_Os01g61370;LOC_Os01g61380	-993;0;0	Os01g0829600	expressed protein
LOC_Os01g61880	2387.05	1401.45	-0.768	1.01e-24	Chr1	35814819	35815319	501	*	5.17	6.16	-0.14	6.3	2.48e-07	6.46e-06	3' UTR	1	35814107	35817684	3578	1	LOC_Os01g61880.2	712	LOC_Os01g61880.1;LOC_Os01g61890.2;LOC_Os01g61890.3;LOC_Os01g61880.2;LOC_Os01g61890.4;LOC_Os01g61890.1	LOC_Os01g61880;LOC_Os01g61890;LOC_Os01g61890;LOC_Os01g61880;LOC_Os01g61890;LOC_Os01g61890	0;0;0;0;0;0	Os01g0835500	respiratory burst oxidase, putative, expressed
LOC_Os01g62130	66.507	25.555	-1.382	7.483e-05	Chr1	35967112	35967612	501	*	5.59	6.26	4.32	1.94	0.0019	0.0114	Promoter (<=1kb)	1	35965949	35966946	998	2	LOC_Os01g62130.1	-166	LOC_Os01g62120.1;LOC_Os01g62130.1	LOC_Os01g62120;LOC_Os01g62130	2805;0	Os01g0838600	ZOS1-14 - C2H2 zinc finger protein, expressed
LOC_Os01g62200	374.744	88.776	-2.079	8.143e-35	Chr1	36005866	36006366	501	*	6.79	7.29	6.01	1.28	0.00101	0.00692	Promoter (<=1kb)	1	36003307	36005101	1795	2	LOC_Os01g62200.2	-765	LOC_Os01g62200.1;LOC_Os01g62200.2;LOC_Os01g62210.1;LOC_Os01g62210.2	LOC_Os01g62200;LOC_Os01g62200;LOC_Os01g62210;LOC_Os01g62210	0;-765;-1000;-1000	Os01g0839200	domain of unknown function DUF966 domain containing protein, expressed	OsDSR2	salt|leaf|gibberellin|oxidative|stem|abiotic stress|salicylic acid| ABA |auxin|jasmonate|ethylene|drought	Overexpression of a new stress-repressive gene OsDSR2 encoding a protein with a DUF966 domain increases salt and simulated drought stress sensitivities and reduces ABA sensitivity in rice
LOC_Os01g62670	16.702	5.723	-1.541	0.04431	Chr1	36297273	36297773	501	*	6.77	7.4	5.61	1.79	0.000419	0.00335	Exon (LOC_Os01g62670.1/LOC_Os01g62670, exon 1 of 3)	1	36296114	36298431	2318	2	LOC_Os01g62670.1	658	LOC_Os01g62670.1;LOC_Os01g62680.1	LOC_Os01g62670;LOC_Os01g62680	0;0	Os01g0845100	avr9/Cf-9 rapidly elicited protein, putative, expressed
LOC_Os01g62740	35.594	12.546	-1.505	0.006118	Chr1	36323191	36323691	501	*	6.04	6.61	5.08	1.52	0.00309	0.0167	Promoter (<=1kb)	1	36323780	36325016	1237	1	LOC_Os01g62740.1	-89	LOC_Os01g62730.1;LOC_Os01g62740.1;LOC_Os01g62750.1	LOC_Os01g62730;LOC_Os01g62740;LOC_Os01g62750	3184;-89;12870	Os01g0845950	expressed protein
LOC_Os01g63050	618.561	354.501	-0.804	3.702e-13	Chr1	36528830	36529330	501	*	5.4	6.31	2.41	3.9	6.96e-06	9.75e-05	Exon (LOC_Os01g63050.1/LOC_Os01g63050, exon 3 of 5)	1	36527672	36530221	2550	1	LOC_Os01g63050.1	1158	LOC_Os01g63050.1	LOC_Os01g63050	0	Os01g0850000	expressed protein
LOC_Os01g63230	1015.05	646.142	-0.652	7.756e-14	Chr1	36650997	36651497	501	*	6.01	6.76	4.39	2.37	8.69e-05	0.000873	Promoter (2-3kb)	1	36643577	36648018	4442	2	LOC_Os01g63230.1	-2979	LOC_Os01g63230.1;LOC_Os01g63240.1;LOC_Os01g63240.2	LOC_Os01g63230;LOC_Os01g63240;LOC_Os01g63240	0;4217;3227	Os01g0851100	growth regulator related protein, putative, expressed
LOC_Os01g63230	1015.05	646.142	-0.652	7.756e-14	Chr1	36650065	36650565	501	*	5.66	6.55	2.89	3.66	0.000133	0.00126	Promoter (2-3kb)	1	36643577	36648018	4442	2	LOC_Os01g63230.1	-2047	LOC_Os01g63220.2;LOC_Os01g63230.1;LOC_Os01g63240.1;LOC_Os01g63240.2	LOC_Os01g63220;LOC_Os01g63230;LOC_Os01g63240;LOC_Os01g63240	0;0;5149;4159	Os01g0851100	growth regulator related protein, putative, expressed
LOC_Os01g63770	1224.69	702.026	-0.802	3.171e-21	Chr1	37003803	37004303	501	*	6.2	6.98	4.39	2.59	2.74e-07	6.92e-06	3' UTR	1	37000046	37004796	4751	1	LOC_Os01g63770.2	3757	LOC_Os01g63770.1;LOC_Os01g63770.2;LOC_Os01g63780.1;LOC_Os01g63780.2	LOC_Os01g63770;LOC_Os01g63770;LOC_Os01g63780;LOC_Os01g63780	0;0;0;0	Os01g0856500	transmembrane amino acid transporter protein, putative, expressed	OsAUX1	tillering|tiller|transporter|auxin|root|growth|iaa|cell cycle|lateral root|development|stress|plasma membrane|root development|root hair|reactive oxygen species|spikelet|auxin transport|auxin response|spikelet development	OsTIR1 and OsAFB2 downregulation via OsmiR393 overexpression leads to more tillers, early flowering and less tolerance to salt and drought in rice|OsAUX1 controls lateral root initiation in rice (Oryza sativa L.).|The auxin transporter, OsAUX1, is involved in primary root and root hair elongation and in Cd stress responses in rice (Oryza sativa L.).|Dynamic Regulation of Auxin Response during Ric…
LOC_Os01g63770	1224.69	702.026	-0.802	3.171e-21	Chr1	37004820	37005320	501	*	5.92	6.63	4.45	2.18	0.00124	0.00813	Downstream (<1kb)	1	37000046	37004796	4751	1	LOC_Os01g63770.2	4774	LOC_Os01g63770.1;LOC_Os01g63770.2;LOC_Os01g63780.1;LOC_Os01g63780.2	LOC_Os01g63770;LOC_Os01g63770;LOC_Os01g63780;LOC_Os01g63780	0;0;0;0	Os01g0856500	transmembrane amino acid transporter protein, putative, expressed	OsAUX1	tillering|tiller|transporter|auxin|root|growth|iaa|cell cycle|lateral root|development|stress|plasma membrane|root development|root hair|reactive oxygen species|spikelet|auxin transport|auxin response|spikelet development	OsTIR1 and OsAFB2 downregulation via OsmiR393 overexpression leads to more tillers, early flowering and less tolerance to salt and drought in rice|OsAUX1 controls lateral root initiation in rice (Oryza sativa L.).|The auxin transporter, OsAUX1, is involved in primary root and root hair elongation and in Cd stress responses in rice (Oryza sativa L.).|Dynamic Regulation of Auxin Response during Ric…
LOC_Os01g63880	87.456	46.766	-0.893	0.003368	Chr1	37068252	37068752	501	*	6.19	6.91	4.68	2.23	0.000222	0.00196	5' UTR	1	37065393	37068896	3504	2	LOC_Os01g63880.1	144	LOC_Os01g63880.1;LOC_Os01g63890.1	LOC_Os01g63880;LOC_Os01g63890	0;3160	Os01g0857600	expressed protein
LOC_Os01g64256	137.493	83.346	-0.717	0.002987	Chr1	37309328	37309828	501	*	5.97	6.53	5.06	1.47	0.00336	0.0178	Exon (LOC_Os01g64256.1/LOC_Os01g64256, exon 1 of 3)	1	37308093	37310312	2220	2	LOC_Os01g64256.1	484	LOC_Os01g64250.1;LOC_Os01g64256.1;LOC_Os01g64262.1;LOC_Os01g64262.2	LOC_Os01g64250;LOC_Os01g64256;LOC_Os01g64262;LOC_Os01g64262	0;0;4908;4908	Os01g0861900	transposon protein, putative, Mutator sub-class, expressed
LOC_Os01g64256	137.493	83.346	-0.717	0.002987	Chr1	37308435	37308935	501	*	5.33	6.32	-0.14	6.46	8.57e-08	2.91e-06	3' UTR	1	37308093	37310312	2220	2	LOC_Os01g64256.1	1377	LOC_Os01g64250.1;LOC_Os01g64256.1;LOC_Os01g64262.1	LOC_Os01g64250;LOC_Os01g64256;LOC_Os01g64262	0;0;5801	Os01g0861900	transposon protein, putative, Mutator sub-class, expressed
LOC_Os01g64960	42717.1	17183.1	-1.314	2.069e-135	Chr1	37699116	37699616	501	*	5.97	6.78	3.95	2.83	0.00855	0.0362	3' UTR	1	37696778	37699752	2975	1	LOC_Os01g64960.2	2338	LOC_Os01g64949.1;LOC_Os01g64960.1;LOC_Os01g64960.2	LOC_Os01g64949;LOC_Os01g64960;LOC_Os01g64960	0;0;0	Os01g0869800	chlorophyll A-B binding protein, putative, expressed	OsPsbS|psbS1
LOC_Os01g65370	209.496	92.285	-1.187	3.809e-10	Chr1	37932784	37933284	501	*	5.73	6.71	-0.14	6.85	1.9e-09	2.23e-07	Exon (LOC_Os01g65370.1/LOC_Os01g65370, exon 2 of 2)	1	37932350	37933295	946	1	LOC_Os01g65370.1	434	LOC_Os01g65370.1	LOC_Os01g65370	0	Os01g0874300	MYB family transcription factor, putative, expressed
LOC_Os01g65780	760.166	378.137	-1.006	4.646e-22	Chr1	38202594	38203094	501	*	5.02	5.98	0.78	5.2	4.85e-07	1.06e-05	3' UTR	1	38198391	38202617	4227	1	LOC_Os01g65780.3	4203	LOC_Os01g65780.1;LOC_Os01g65780.4;LOC_Os01g65780.2;LOC_Os01g65780.3	LOC_Os01g65780;LOC_Os01g65780;LOC_Os01g65780;LOC_Os01g65780	0;0;0;0	Os01g0880200	glycosyl transferase, putative, expressed
LOC_Os01g65780	760.166	378.137	-1.006	4.646e-22	Chr1	38203645	38204145	501	*	6.31	7.08	4.57	2.51	2.11e-08	1.08e-06	Downstream (2-3kb)	1	38198391	38202617	4227	1	LOC_Os01g65780.3	5254	LOC_Os01g65780.1;LOC_Os01g65780.4;LOC_Os01g65780.2;LOC_Os01g65780.3;LOC_Os01g65790.1	LOC_Os01g65780;LOC_Os01g65780;LOC_Os01g65780;LOC_Os01g65780;LOC_Os01g65790	0;0;0;0;0	Os01g0880200	glycosyl transferase, putative, expressed
LOC_Os01g66930	1660.04	987.337	-0.75	7.751e-20	Chr1	38875325	38875825	501	*	6.03	6.6	5.09	1.51	0.000819	0.00583	Promoter (<=1kb)	1	38871378	38874494	3117	2	LOC_Os01g66930.2	-831	LOC_Os01g66930.2	LOC_Os01g66930	-831	Os01g0894100	transposon protein, putative, CACTA, En/Spm sub-class, expressed
LOC_Os01g67090	467.946	196.765	-1.249	7.65e-20	Chr1	38948505	38949005	501	*	5.63	6.44	3.57	2.87	0.00864	0.0365	Exon (LOC_Os01g67090.1/LOC_Os01g67090, exon 3 of 5)	1	38946700	38950827	4128	1	LOC_Os01g67090.1	1805	LOC_Os01g67080.1;LOC_Os01g67090.1	LOC_Os01g67080;LOC_Os01g67090	-2867;0	Os01g0896200	IQ calmodulin-binding motif domain containing protein, expressed
LOC_Os01g67240	85.532	24.726	-1.799	2.99e-07	Chr1	39017337	39017837	501	*	5.03	6.01	-0.14	6.15	9.4e-07	1.81e-05	5' UTR	1	39013759	39017951	4193	2	LOC_Os01g67240.1	114	LOC_Os01g67240.1	LOC_Os01g67240	0	Os01g0897700	formin-like protein 1 precursor, putative, expressed	OsFH1	root hair|root|growth	Formin homology 1 (OsFH1) regulates root-hair elongation in rice (Oryza sativa)
LOC_Os01g67570	1301.47	520.425	-1.322	2.653e-51	Chr1	39274446	39274946	501	*	5.97	6.8	3.74	3.06	0.00306	0.0166	Promoter (<=1kb)	1	39270532	39274996	4465	2	LOC_Os01g67570.1	50	LOC_Os01g67570.1;LOC_Os01g67580.1	LOC_Os01g67570;LOC_Os01g67580	0;0	Os01g0901900	PDE312/PTAC10, putative, expressed
LOC_Os01g67950	80.602	49.926	-0.689	0.03081	Chr1	39484656	39485156	501	*	5.41	5.96	4.49	1.48	0.0102	0.0411	3' UTR	1	39483755	39484808	1054	1	LOC_Os01g67950.1	901	LOC_Os01g67950.1;LOC_Os01g67960.1	LOC_Os01g67950;LOC_Os01g67960	0;0	Os01g0907200	ubiquitin family protein, putative, expressed
LOC_Os01g68050	40.006	14.76	-1.445	0.003043	Chr1	39561908	39562870	963	*	6.22	6.68	5.54	1.14	0.0076	0.0331	Promoter (<=1kb)	1	39562495	39565691	3197	1	LOC_Os01g68050.2	0	LOC_Os01g68050.2;LOC_Os01g68050.1;LOC_Os01g68060.1	LOC_Os01g68050;LOC_Os01g68050;LOC_Os01g68060	0;0;0	Os01g0908600	transmembrane amino acid transporter protein, putative, expressed	OsProT1	leaf|vegetative|stress|plasma membrane|cadmium|aminobutyric acid	OsProT1 and OsProT3 Function to Mediate Proline- and -aminobutyric acid-specific Transport in Yeast and are Differentially Expressed in Rice (Oryza sativa L.).
LOC_Os01g68890	67.11	36.333	-0.883	0.01105	Chr1	40029833	40030333	501	*	6.37	7.05	5.06	1.98	0.00206	0.0121	3' UTR	1	40030104	40031429	1326	2	LOC_Os01g68890.1	1096	LOC_Os01g68880.1;LOC_Os01g68890.1	LOC_Os01g68880;LOC_Os01g68890	-1105;0	Os01g0917700	P21-Rho-binding domain containing protein, putative, expressed
LOC_Os01g69200	47.028	13.171	-1.85	5.92e-05	Chr1	40212909	40213409	501	*	5.44	6.18	3.83	2.35	0.00321	0.0172	Promoter (1-2kb)	1	40215071	40216944	1874	1	LOC_Os01g69200.1	-1662	LOC_Os01g69190.1;LOC_Os01g69200.1	LOC_Os01g69190;LOC_Os01g69200	0;0	Os01g0921100	regulatory protein, putative, expressed
LOC_Os01g69200	47.028	13.171	-1.85	5.92e-05	Chr1	40215897	40216397	501	*	5.13	5.96	2.89	3.08	0.00474	0.0232	Exon (LOC_Os01g69200.1/LOC_Os01g69200, exon 3 of 3)	1	40215071	40216944	1874	1	LOC_Os01g69200.1	826	LOC_Os01g69190.1;LOC_Os01g69200.1	LOC_Os01g69190;LOC_Os01g69200	0;0	Os01g0921100	regulatory protein, putative, expressed
LOC_Os01g70680	37.867	11.552	-1.718	0.001537	Chr1	40921987	40922487	501	*	5.24	6.05	3.22	2.83	6.49e-05	0.000677	Promoter (<=1kb)	1	40921899	40922318	420	1	LOC_Os01g70680.1	88	LOC_Os01g70670.2;LOC_Os01g70670.1;LOC_Os01g70680.1;LOC_Os01g70690.1	LOC_Os01g70670;LOC_Os01g70670;LOC_Os01g70680;LOC_Os01g70690	6652;6652;0;1566	Os01g0932700	DEF1 - Defensin and Defensin-like DEFL family, expressed
LOC_Os01g70820	211.839	113.019	-0.911	5.884e-06	Chr1	40992020	40992520	501	*	5.54	6.16	4.42	1.75	0.00656	0.0297	Promoter (1-2kb)	1	40994303	40997132	2830	1	LOC_Os01g70820.1	-1783	LOC_Os01g70810.1;LOC_Os01g70820.1	LOC_Os01g70810;LOC_Os01g70820	0;0	Os01g0934350	lumenal PsbP, putative, expressed
LOC_Os01g70820	211.839	113.019	-0.911	5.884e-06	Chr1	40994088	40994588	501	*	5.51	6.37	3.11	3.26	6.81e-05	0.000706	Promoter (<=1kb)	1	40994303	40997132	2830	1	LOC_Os01g70820.1	0	LOC_Os01g70810.1;LOC_Os01g70820.1	LOC_Os01g70810;LOC_Os01g70820	0;0	Os01g0934350	lumenal PsbP, putative, expressed
LOC_Os01g71310	166.013	63.497	-1.393	1.734e-09	Chr1	41277315	41277815	501	*	5.4	6.22	3.35	2.87	1.97e-05	0.000242	Distal Intergenic	1	41300203	41303044	2842	1	LOC_Os01g71310.1	-22388				Os01g0940000	cytokinin dehydrogenase precursor, putative, expressed	OsCKX4	leaf|root|shoot|development|auxin|cytokinin|crown|crown root|root development|cytokinin response|auxin response	CYTOKININ OXIDASE/DEHYDROGENASE4 Integrates Cytokinin and Auxin Signaling to Control Rice Crown Root Formation.
LOC_Os01g71310	166.013	63.497	-1.393	1.734e-09	Chr1	41298693	41299193	501	*	6.52	7.04	5.69	1.35	0.000892	0.00625	Promoter (1-2kb)	1	41300203	41303044	2842	1	LOC_Os01g71310.1	-1010	LOC_Os01g71310.1	LOC_Os01g71310	0	Os01g0940000	cytokinin dehydrogenase precursor, putative, expressed	OsCKX4	leaf|root|shoot|development|auxin|cytokinin|crown|crown root|root development|cytokinin response|auxin response	CYTOKININ OXIDASE/DEHYDROGENASE4 Integrates Cytokinin and Auxin Signaling to Control Rice Crown Root Formation.
LOC_Os01g72470	45.325	6.089	-2.903	2.621e-08	Chr1	42020915	42021415	501	*	6.58	7.05	5.89	1.15	0.00625	0.0286	Promoter (<=1kb)	1	42020859	42021464	606	2	LOC_Os01g72470.1	49	LOC_Os01g72460.1;LOC_Os01g72470.1	LOC_Os01g72460;LOC_Os01g72470	0;0	Os01g0954100	expressed protein
LOC_Os01g73170	7102.53	3564.85	-0.995	1.2e-60	Chr1	42429537	42430037	501	*	5.6	6.45	3.27	3.18	0.0001	0.000987	Promoter (<=1kb)	1	42429502	42432618	3117	1	LOC_Os01g73170.1	35	LOC_Os01g73160.1;LOC_Os01g73170.1	LOC_Os01g73160;LOC_Os01g73170	-2279;0	Os01g0962700	peroxidase precursor, putative, expressed
LOC_Os02g01765	136.93	84.224	-0.694	0.004011	Chr2	425194	425694	501	*	6.76	7.33	5.8	1.53	0.000634	0.00472	3' UTR	5	425109	426481	1373	2	LOC_Os02g01765.1	787	LOC_Os02g01760.1;LOC_Os02g01765.1;LOC_Os02g01770.1	LOC_Os02g01760;LOC_Os02g01765;LOC_Os02g01770	2500;0;0	Os02g0107251	expressed protein
LOC_Os02g01890	133.922	77.739	-0.785	0.001024	Chr2	487387	487887	501	*	5.27	6.21	1.54	4.67	3.63e-07	8.53e-06	Promoter (1-2kb)	5	488913	490612	1700	1	LOC_Os02g01890.1	-1026	LOC_Os02g01880.1;LOC_Os02g01890.1	LOC_Os02g01880;LOC_Os02g01890	0;0	Os02g0108800	cytochrome P450, putative, expressed
LOC_Os02g02040	490.034	164.39	-1.575	5.492e-33	Chr2	572453	572953	501	*	6.1	6.57	5.39	1.18	0.00767	0.0333	Promoter (<=1kb)	5	566043	572743	6701	2	LOC_Os02g02040.1	0	LOC_Os02g02040.1;LOC_Os02g02040.2;LOC_Os02g02040.5;LOC_Os02g02050.1	LOC_Os02g02040;LOC_Os02g02040;LOC_Os02g02040;LOC_Os02g02050	0;-2574;0;16790	Os02g0110600	protein kinase, putative, expressed
LOC_Os02g02340	96.668	51.023	-0.917	0.0008999	Chr2	777960	778460	501	*	5.48	6.2	3.95	2.25	0.0104	0.0417	Promoter (<=1kb)	5	775494	778356	2863	2	LOC_Os02g02340.1	0	LOC_Os02g02330.1;LOC_Os02g02340.1;LOC_Os02g02350.3;LOC_Os02g02350.1;LOC_Os02g02350.2	LOC_Os02g02330;LOC_Os02g02340;LOC_Os02g02350;LOC_Os02g02350;LOC_Os02g02350	3053;0;6743;6757;7216	Os02g0114400	glycerol-3-phosphate acyltransferase, putative, expressed
LOC_Os02g02380	127.511	37.11	-1.783	9.084e-12	Chr2	795895	796395	501	*	4.95	5.92	0.49	5.42	6.27e-07	1.31e-05	Promoter (<=1kb)	5	795066	796280	1215	2	LOC_Os02g02380.1	0	LOC_Os02g02380.1	LOC_Os02g02380	0	Os02g0114900	suppressor of phythchrome A, putative, expressed
LOC_Os02g04460	7771.69	3244.17	-1.261	5.378e-60	Chr2	1973068	1973568	501	*	4.79	5.76	-0.14	5.9	2.66e-06	4.33e-05	3' UTR	5	1972935	1974663	1729	2	LOC_Os02g04460.1	1095	LOC_Os02g04450.4;LOC_Os02g04450.1;LOC_Os02g04450.3;LOC_Os02g04460.1	LOC_Os02g04450;LOC_Os02g04450;LOC_Os02g04450;LOC_Os02g04460	5370;5370;4520;0	Os02g0137200	ribosomal protein L3, putative, expressed
LOC_Os02g04500	214.863	131.572	-0.708	6.721e-05	Chr2	1996321	1996821	501	*	5.25	6.1	2.89	3.21	0.00252	0.0142	Promoter (1-2kb)	5	1998224	2000921	2698	1	LOC_Os02g04500.1	-1403	LOC_Os02g04490.1;LOC_Os02g04500.1;LOC_Os02g04500.2	LOC_Os02g04490;LOC_Os02g04500;LOC_Os02g04500	0;-1403;-1403	Os02g0137600	S-adenosyl-L-methionine-dependent methyltransferase mraW, putative, expressed
LOC_Os02g04540	75.939	27.032	-1.499	8.439e-06	Chr2	2021294	2021794	501	*	5.41	6.39	-0.14	6.53	3.21e-08	1.46e-06	Exon (LOC_Os02g04540.1/LOC_Os02g04540, exon 1 of 1)	5	2020969	2023488	2520	2	LOC_Os02g04540.1	1694	LOC_Os02g04540.1	LOC_Os02g04540	0	Os02g0138000	retrotransposon protein, putative, unclassified, expressed
LOC_Os02g05530	56.402	26.033	-1.111	0.002668	Chr2	2672642	2673142	501	*	6	6.67	4.74	1.92	0.000204	0.00182	Promoter (<=1kb)	5	2674126	2676604	2479	1	LOC_Os02g05530.1	-984	LOC_Os02g05520.1;LOC_Os02g05530.1	LOC_Os02g05520;LOC_Os02g05530	0;0	Os02g0149050	expressed protein
LOC_Os02g05530	56.402	26.033	-1.111	0.002668	Chr2	2676700	2677200	501	*	5.39	6.2	3.35	2.85	1.81e-05	0.000225	Distal Intergenic	5	2674126	2676604	2479	1	LOC_Os02g05530.1	2574	LOC_Os02g05530.1;LOC_Os02g05540.1	LOC_Os02g05530;LOC_Os02g05540	0;-2776	Os02g0149050	expressed protein
LOC_Os02g05890	1451.19	881.884	-0.72	6.55e-17	Chr2	2922719	2923219	501	*	5.01	5.98	-0.14	6.13	6.46e-07	1.33e-05	3' UTR	5	2922354	2925073	2720	2	LOC_Os02g05890.1	1854	LOC_Os02g05890.1	LOC_Os02g05890	0	Os02g0152900	EMB1303, putative, expressed	YL1|YS83	chloroplast|development|photosynthesis|chloroplast development|leaf|seed|map-based cloning|seed size|grain weight	A Nucleus-Encoded Chloroplast Protein YL1 Is Involved in Chloroplast Development and Efficient Biogenesis of Chloroplast ATP Synthase in Rice.|Map-based cloning and characterization of the novel yellow-green leaf gene ys83 in rice (Oryza sativa)
LOC_Os02g06380	173.441	106.278	-0.707	0.000712	Chr2	3189101	3189601	501	*	6.32	7.06	4.74	2.32	1.97e-05	0.000242	Exon (LOC_Os02g06380.1/LOC_Os02g06380, exon 1 of 2)	5	3187941	3190190	2250	2	LOC_Os02g06380.1	589	LOC_Os02g06370.1;LOC_Os02g06380.1;LOC_Os02g06390.1	LOC_Os02g06370;LOC_Os02g06380;LOC_Os02g06390	-2063;0;4542	Os02g0158500	plant-specific domain TIGR01627 family protein, expressed
LOC_Os02g06605	195.956	123.346	-0.662	0.001073	Chr2	3328022	3328522	501	*	6.12	6.76	4.98	1.78	0.000163	0.00151	Exon (LOC_Os02g06605.1/LOC_Os02g06605, exon 1 of 1)	5	3327798	3328578	781	1	LOC_Os02g06605.1	224	LOC_Os02g06600.1;LOC_Os02g06605.1;LOC_Os02g06610.1	LOC_Os02g06600;LOC_Os02g06605;LOC_Os02g06610	0;0;1684	Os02g0161601	expressed protein
LOC_Os02g08380	2739.22	1588.1	-0.787	1.443e-28	Chr2	4460334	4460834	501	*	5.17	6.15	-0.14	6.29	2.07e-07	5.64e-06	Promoter (<=1kb)	5	4460300	4463704	3405	1	LOC_Os02g08380.1	34	LOC_Os02g08370.1;LOC_Os02g08380.1	LOC_Os02g08370;LOC_Os02g08380	-2586;0	Os02g0180200	CR084 protein, putative, expressed
LOC_Os02g09390	32.199	5.163	-2.649	1.121e-05	Chr2	4824273	4824773	501	*	5.63	6.39	3.95	2.44	0.00099	0.0068	Promoter (<=1kb)	5	4824246	4825855	1610	1	LOC_Os02g09390.1	27	LOC_Os02g09380.1;LOC_Os02g09390.1;LOC_Os02g09400.1	LOC_Os02g09380;LOC_Os02g09390;LOC_Os02g09400	3809;0;0	Os02g0186800	cytochrome P450, putative, expressed
LOC_Os02g09400	222.482	83.364	-1.413	3.018e-14	Chr2	4826340	4826840	501	*	5.48	6.23	3.8	2.43	0.000515	0.00397	Promoter (<=1kb)	5	4826405	4828225	1821	1	LOC_Os02g09400.1	0	LOC_Os02g09390.1;LOC_Os02g09400.1;LOC_Os02g09410.1	LOC_Os02g09390;LOC_Os02g09400;LOC_Os02g09410	0;0;0	Os02g0186900	cytochrome P450, putative, expressed
LOC_Os02g09930	336.461	155.206	-1.111	1.559e-12	Chr2	5154245	5154745	501	*	5.08	5.83	3.44	2.39	0.00148	0.00938	Intron (LOC_Os02g09930.2/LOC_Os02g09930, intron 3 of 7)	5	5151783	5158885	7103	2	LOC_Os02g09930.2	4140	LOC_Os02g09930.2;LOC_Os02g09930.1	LOC_Os02g09930;LOC_Os02g09930	0;0	Os02g0192500	CSLA1 - cellulose synthase-like family A; mannan synthase, expressed
LOC_Os02g09930	336.461	155.206	-1.111	1.559e-12	Chr2	5158380	5158880	501	*	5.41	6.31	2.56	3.74	0.000177	0.00161	Promoter (<=1kb)	5	5151783	5158885	7103	2	LOC_Os02g09930.2	5	LOC_Os02g09930.2;LOC_Os02g09930.1	LOC_Os02g09930;LOC_Os02g09930	0;0	Os02g0192500	CSLA1 - cellulose synthase-like family A; mannan synthase, expressed
LOC_Os02g10850	92.77	26.968	-1.785	3.829e-08	Chr2	5756169	5756669	501	*	6.08	6.79	4.65	2.14	0.00174	0.0107	Exon (LOC_Os02g10850.1/LOC_Os02g10850, exon 2 of 2)	5	5755371	5758098	2728	2	LOC_Os02g10850.1	1429	LOC_Os02g10840.2;LOC_Os02g10840.1;LOC_Os02g10840.3;LOC_Os02g10850.1	LOC_Os02g10840;LOC_Os02g10840;LOC_Os02g10840;LOC_Os02g10850	0;0;0;0	Os02g0202900	OsFBK3 - F-box domain and kelch repeat containing protein, expressed
LOC_Os02g13290	30.321	13.17	-1.198	0.03498	Chr2	7079047	7079547	501	*	6.38	7.07	5.01	2.06	4.3e-05	0.000475	Exon (LOC_Os02g13290.1/LOC_Os02g13290, exon 2 of 2)	5	7078703	7080035	1333	1	LOC_Os02g13290.1	344	LOC_Os02g13290.1	LOC_Os02g13290	0	Os02g0226200	phosphoethanolamine/phosphocholine phosphatase, putative, expressed
LOC_Os02g13520	65.447	33.352	-0.975	0.00503	Chr2	7251439	7251939	501	*	5.01	5.99	-0.14	6.13	5.88e-07	1.24e-05	Promoter (2-3kb)	5	7245015	7248672	3658	2	LOC_Os02g13520.1	-2767	LOC_Os02g13520.1	LOC_Os02g13520	-2767	Os02g0228900	OsIAA7 - Auxin-responsive Aux/IAA gene family member, expressed
LOC_Os02g13710	33.813	9.216	-1.879	0.0005215	Chr2	7357238	7357738	501	*	5.05	5.87	2.89	2.98	0.0054	0.0256	Distal Intergenic	5	7365220	7366415	1196	1	LOC_Os02g13710.1	-7482				Os02g0231000	ethylene-responsive transcription factor TINY, putative, expressed
LOC_Os02g14970	35.914	17.385	-1.049	0.02942	Chr2	8350344	8350844	501	*	5.75	6.41	4.51	1.9	0.00204	0.0121	Promoter (<=1kb)	5	8350306	8352195	1890	1	LOC_Os02g14970.1	38	LOC_Os02g14970.1	LOC_Os02g14970	0	Os02g0247600	expressed protein
LOC_Os02g16610	56.602	11.45	-2.304	3.539e-08	Chr2	9495101	9495601	501	*	5.51	6.44	1.91	4.53	6.52e-08	2.42e-06	Promoter (<=1kb)	5	9495107	9495712	606	1	LOC_Os02g16610.1	0	LOC_Os02g16600.1;LOC_Os02g16600.2;LOC_Os02g16610.1;LOC_Os02g16620.1	LOC_Os02g16600;LOC_Os02g16600;LOC_Os02g16610;LOC_Os02g16620	8664;3098;0;0	Os02g0265800	harpin-induced protein 1 domain containing protein, expressed
LOC_Os02g16709	657.312	315.996	-1.053	3.779e-18	Chr2	9544281	9544781	501	*	5.01	5.99	-0.14	6.13	2.32e-06	3.84e-05	5' UTR	5	9544161	9550627	6467	1	LOC_Os02g16709.1	120	LOC_Os02g16690.1;LOC_Os02g16709.1	LOC_Os02g16690;LOC_Os02g16709	4901;0	Os02g0267000	peptidase, putative, expressed
LOC_Os02g18150	20.925	1.252	-4.093	5.207e-05	Chr2	10544137	10544637	501	*	5.89	6.41	5.07	1.34	0.013	0.049	Promoter (<=1kb)	5	10540688	10543155	2468	2	LOC_Os02g18150.1	-982	LOC_Os02g18150.2;LOC_Os02g18150.3;LOC_Os02g18150.1;LOC_Os02g18160.1	LOC_Os02g18150;LOC_Os02g18150;LOC_Os02g18150;LOC_Os02g18160	-982;-982;-982;-1204	Os02g0282600	expressed protein
LOC_Os02g19629	303.709	196.768	-0.631	6.533e-05	Chr2	11474453	11474953	501	*	5.25	6.23	-0.14	6.37	2.56e-07	6.59e-06	Promoter (<=1kb)	5	11470576	11474785	4210	2	LOC_Os02g19629.2	0	LOC_Os02g19629.2;LOC_Os02g19629.1	LOC_Os02g19629;LOC_Os02g19629	0;0	Os02g0298900	expressed protein
LOC_Os02g21890	252.556	94.668	-1.416	1.231e-14	Chr2	13014095	13014985	891	*	6.53	7.19	5.29	1.89	0.000103	0.00101	Promoter (<=1kb)	5	13014468	13015693	1226	1	LOC_Os02g21890.1	0	LOC_Os02g21880.2;LOC_Os02g21880.1;LOC_Os02g21890.1	LOC_Os02g21880;LOC_Os02g21880;LOC_Os02g21890	7144;7143;0	Os02g0324400	expressed protein	FOS1	vegetative|meristem	FON2 SPARE1 redundantly regulates floral meristem maintenance with FLORAL ORGAN NUMBER2 in rice
LOC_Os02g22070	581.685	335.743	-0.796	2.9e-12	Chr2	13122120	13122620	501	*	5.79	6.71	2.56	4.15	1.86e-05	0.000229	Intron (LOC_Os02g22060.1/LOC_Os02g22060, intron 5 of 7)	5	13127053	13132583	5531	1	LOC_Os02g22070.1	-4433	LOC_Os02g22060.1	LOC_Os02g22060	0	Os02g0326200	expressed protein
LOC_Os02g22070	581.685	335.743	-0.796	2.9e-12	Chr2	13126492	13126992	501	*	5.27	6.25	-0.14	6.39	8.93e-08	3e-06	Promoter (<=1kb)	5	13127053	13132583	5531	1	LOC_Os02g22070.1	-61	LOC_Os02g22060.1;LOC_Os02g22070.1	LOC_Os02g22060;LOC_Os02g22070	0;-61	Os02g0326200	expressed protein
LOC_Os02g22100	5215.94	2704.66	-0.947	6.127e-48	Chr2	13156342	13156842	501	*	5.42	6.39	0.93	5.46	2.44e-08	1.2e-06	Promoter (<=1kb)	5	13156576	13161785	5210	1	LOC_Os02g22100.7	0	LOC_Os02g22100.7;LOC_Os02g22100.5;LOC_Os02g22100.4;LOC_Os02g22100.1;LOC_Os02g22100.3;LOC_Os02g22100.6;LOC_Os02g22100.2	LOC_Os02g22100;LOC_Os02g22100;LOC_Os02g22100;LOC_Os02g22100;LOC_Os02g22100;LOC_Os02g22100;LOC_Os02g22100	0;0;0;0;0;0;0	Os02g0326700	OsRhmbd6 - Putative Rhomboid homologue, expressed
LOC_Os02g22650	229.461	136.333	-0.753	6.407e-05	Chr2	13496670	13497170	501	*	7.09	7.56	6.39	1.17	0.000682	0.00501	Exon (LOC_Os02g22650.1/LOC_Os02g22650, exon 3 of 3)	5	13495411	13498723	3313	1	LOC_Os02g22650.2	1259	LOC_Os02g22650.1;LOC_Os02g22650.2;LOC_Os02g22660.1	LOC_Os02g22650;LOC_Os02g22650;LOC_Os02g22660	0;0;-1745	Os02g0331200	glycosyltransferase, putative, expressed
LOC_Os02g22820	728.467	449.838	-0.69	7.964e-09	Chr2	13606344	13606844	501	*	5.17	6.02	2.79	3.24	0.00287	0.0158	Exon (LOC_Os02g22820.1/LOC_Os02g22820, exon 3 of 3)	5	13606029	13607508	1480	2	LOC_Os02g22820.1	664	LOC_Os02g22820.1	LOC_Os02g22820	0	Os02g0332700	expressed protein
LOC_Os02g25630	204.226	54.464	-1.911	1.733e-19	Chr2	14985393	14985893	501	*	6.85	7.32	6.15	1.17	0.00533	0.0254	Promoter (<=1kb)	5	14983999	14985969	1971	2	LOC_Os02g25630.1	76	LOC_Os02g25624.1;LOC_Os02g25630.1	LOC_Os02g25624;LOC_Os02g25630	0;0	Os02g0453400	expressed protein
LOC_Os02g25630	204.226	54.464	-1.911	1.733e-19	Chr2	14984192	14984692	501	*	6.52	7.26	4.93	2.33	9.85e-05	0.000973	Exon (LOC_Os02g25630.1/LOC_Os02g25630, exon 3 of 4)	5	14983999	14985969	1971	2	LOC_Os02g25630.1	1277	LOC_Os02g25624.1;LOC_Os02g25630.1	LOC_Os02g25624;LOC_Os02g25630	0;0	Os02g0453400	expressed protein
LOC_Os02g29150	28.426	10.236	-1.455	0.0161	Chr2	17282058	17282558	501	*	5.88	6.71	3.69	3.02	0.00382	0.0197	Intron (LOC_Os02g29160.1/LOC_Os02g29160, intron 7 of 11)	5	17272063	17275865	3803	2	LOC_Os02g29150.1	-6193	LOC_Os02g29160.1	LOC_Os02g29160	0	Os02g0493100	OsFBO11 - F-box and other domain containing protein, expressed	OsRALyase
LOC_Os02g30650	564.41	263.556	-1.098	2.278e-17	Chr2	18260297	18260797	501	*	6.71	7.26	5.82	1.44	0.000309	0.00259	Distal Intergenic	5	18252570	18256034	3465	1	LOC_Os02g30650.1	7727				Os02g0510600	heavy metal-associated domain containing protein, expressed
LOC_Os02g32814	360.263	179.742	-1.006	6.944e-12	Chr2	19484178	19484678	501	*	5.51	6.37	3.07	3.3	0.00167	0.0103	Intron (LOC_Os02g32814.1/LOC_Os02g32814, intron 2 of 3)	5	19472211	19486248	14038	2	LOC_Os02g32814.1	1570	LOC_Os02g32814.1	LOC_Os02g32814	0	Os02g0530100	heavy metal-associated domain containing protein, expressed
LOC_Os02g32970	450.016	187.314	-1.266	1.301e-20	Chr2	19589635	19590135	501	*	6.81	7.29	6.1	1.19	0.000714	0.00521	Promoter (1-2kb)	5	19591268	19595530	4263	1	LOC_Os02g32970.1	-1133	LOC_Os02g32970.1	LOC_Os02g32970	0	Os02g0532300	hydrolase, alpha/beta fold family protein, putative, expressed
LOC_Os02g32970	450.016	187.314	-1.266	1.301e-20	Chr2	19594568	19595068	501	*	6.3	7.08	4.43	2.65	4.52e-05	0.000496	Exon (LOC_Os02g32970.1/LOC_Os02g32970, exon 4 of 5)	5	19591268	19595530	4263	1	LOC_Os02g32970.1	3300	LOC_Os02g32970.1;LOC_Os02g32980.1	LOC_Os02g32970;LOC_Os02g32980	0;3547	Os02g0532300	hydrolase, alpha/beta fold family protein, putative, expressed
LOC_Os02g32980	173.917	95.391	-0.871	7.664e-05	Chr2	19596451	19596951	501	*	5.8	6.75	1.77	4.99	2.04e-10	5.03e-08	Downstream (<1kb)	5	19597489	19598615	1127	2	LOC_Os02g32980.1	1664	LOC_Os02g32970.1;LOC_Os02g32980.1	LOC_Os02g32970;LOC_Os02g32980	0;1664	Os02g0532500	Cupin domain containing protein, expressed	OsGLP2-1	leaf|resistance|panicle|sheath|disease|blast|disease resistance|jasmonic| ja |jasmonic acid|blight|JA|bacterial blight|pathogen|fungal blast	The germin-like protein OsGLP2-1 enhances resistance to fungal blast and bacterial blight in rice.
LOC_Os02g33000	100.752	65.658	-0.622	0.02711	Chr2	19621295	19621795	501	*	6.65	7.16	5.86	1.3	0.000164	0.00151	Exon (LOC_Os02g33000.1/LOC_Os02g33000, exon 2 of 3)	5	19619243	19623844	4602	1	LOC_Os02g33000.1	2052	LOC_Os02g33000.1;LOC_Os02g33010.1	LOC_Os02g33000;LOC_Os02g33010	0;0	Os02g0532900	glycosyl hydrolases family 17, putative, expressed
LOC_Os02g33550	108.492	42.558	-1.35	2.381e-06	Chr2	19952186	19952686	501	*	5.73	6.6	3.19	3.41	4.79e-06	7.09e-05	Downstream (1-2kb)	5	19954553	19955660	1108	2	LOC_Os02g33550.1	2974	LOC_Os02g33550.1	LOC_Os02g33550	0	Os02g0538700	harpin-induced protein 1 domain containing protein, expressed
LOC_Os02g33550	108.492	42.558	-1.35	2.381e-06	Chr2	19952843	19953343	501	*	5.94	6.85	2.89	3.96	6.93e-06	9.72e-05	Downstream (1-2kb)	5	19954553	19955660	1108	2	LOC_Os02g33550.1	2317	LOC_Os02g33550.1	LOC_Os02g33550	0	Os02g0538700	harpin-induced protein 1 domain containing protein, expressed
LOC_Os02g34860	826.223	460.747	-0.842	1.048e-18	Chr2	20913777	20914277	501	*	5.9	6.66	4.18	2.48	0.000667	0.00492	Promoter (<=1kb)	5	20913876	20919120	5245	1	LOC_Os02g34860.1	0	LOC_Os02g34860.1	LOC_Os02g34860	0	Os02g0554100	Regulator of chromosome condensation domain containing protein, expressed
LOC_Os02g34930	221.671	125.53	-0.822	1.81e-05	Chr2	20956562	20957062	501	*	5.18	5.89	3.72	2.17	0.00111	0.00745	Downstream (<1kb)	5	20955219	20956285	1067	1	LOC_Os02g34930.1	1343	LOC_Os02g34930.1;LOC_Os02g34940.2;LOC_Os02g34940.1	LOC_Os02g34930;LOC_Os02g34940;LOC_Os02g34940	0;0;0	Os02g0554800	expressed protein
LOC_Os02g34930	221.671	125.53	-0.822	1.81e-05	Chr2	20955568	20956068	501	*	5.25	6.1	2.89	3.21	0.00249	0.0141	3' UTR	5	20955219	20956285	1067	1	LOC_Os02g34930.1	349	LOC_Os02g34930.1;LOC_Os02g34940.2;LOC_Os02g34940.1	LOC_Os02g34930;LOC_Os02g34940;LOC_Os02g34940	0;0;0	Os02g0554800	expressed protein
LOC_Os02g35320	168.439	76.173	-1.15	5.682e-08	Chr2	21244598	21245098	501	*	6.1	6.69	5.1	1.59	0.000238	0.00208	Intron (LOC_Os02g35320.1/LOC_Os02g35320, intron 4 of 5)	5	21243251	21246761	3511	1	LOC_Os02g35320.1	1347	LOC_Os02g35320.1	LOC_Os02g35320	0	Os02g0559500	expressed protein
LOC_Os02g36490	168.665	110.157	-0.609	0.00398	Chr2	22042248	22042748	501	*	6.07	6.67	5.01	1.66	0.000981	0.00674	Promoter (<=1kb)	5	22038604	22042021	3418	2	LOC_Os02g36490.1	-227	LOC_Os02g36490.2;LOC_Os02g36490.3;LOC_Os02g36490.1;LOC_Os02g36500.1	LOC_Os02g36490;LOC_Os02g36490;LOC_Os02g36490;LOC_Os02g36500	-369;-369;-227;4152	Os02g0574500	expressed protein
LOC_Os02g36550	17.964	5.469	-1.713	0.02316	Chr2	22069977	22070477	501	*	5.69	6.37	4.32	2.05	0.00105	0.00711	5' UTR	5	22068014	22070683	2670	2	LOC_Os02g36550.1	206	LOC_Os02g36540.1;LOC_Os02g36550.1	LOC_Os02g36540;LOC_Os02g36550	4271;0	Os02g0575200	phosphopantothenate--cysteine ligase, putative, expressed
LOC_Os02g37300	307.8	199.09	-0.627	5.66e-05	Chr2	22555483	22555983	501	*	4.76	5.51	3.08	2.43	0.00679	0.0305	Promoter (1-2kb)	5	22553601	22554113	513	2	LOC_Os02g37300.1	-1370	LOC_Os02g37300.1;LOC_Os02g37309.1	LOC_Os02g37300;LOC_Os02g37309	0;0	Os02g0584800	heavy metal associated domain containing protein, expressed
LOC_Os02g37300	307.8	199.09	-0.627	5.66e-05	Chr2	22553602	22554102	501	*	6.8	7.32	5.99	1.32	0.0109	0.0432	Promoter (<=1kb)	5	22553601	22554113	513	2	LOC_Os02g37300.1	11	LOC_Os02g37290.1;LOC_Os02g37300.1;LOC_Os02g37309.1	LOC_Os02g37290;LOC_Os02g37300;LOC_Os02g37309	0;0;0	Os02g0584800	heavy metal associated domain containing protein, expressed
LOC_Os02g37690	5812.03	3296.7	-0.818	8.037e-39	Chr2	22742572	22743072	501	*	6.22	6.92	4.8	2.11	8.79e-06	0.000119	Exon (LOC_Os02g37690.1/LOC_Os02g37690, exon 1 of 1)	5	22741363	22743361	1999	2	LOC_Os02g37690.1	289	LOC_Os02g37690.1;LOC_Os02g37694.1	LOC_Os02g37690;LOC_Os02g37694	0;-678	Os02g0589400	UDP-glucoronosyl and UDP-glucosyl transferase, putative, expressed
LOC_Os02g37750	5.223	0.304	-3.997	0.04853	Chr2	22780065	22780565	501	*	6.54	6.97	5.93	1.03	0.00322	0.0172	Promoter (1-2kb)	5	22778090	22778484	395	2	LOC_Os02g37750.1	-1581	LOC_Os02g37750.1;LOC_Os02g37760.1	LOC_Os02g37750;LOC_Os02g37760	0;0	None	lecithine cholesterol acyltransferase, putative, expressed
LOC_Os02g37830	746.649	347.683	-1.101	1.05e-25	Chr2	22825603	22826103	501	*	6.35	7.34	-0.14	7.48	9.45e-12	6.55e-09	5' UTR	5	22822064	22826220	4157	2	LOC_Os02g37830.1	117	LOC_Os02g37830.1;LOC_Os02g37830.2	LOC_Os02g37830;LOC_Os02g37830	0;0	Os02g0590800	protein kinase domain containing protein, expressed
LOC_Os02g38120	126.491	69.425	-0.868	0.0003338	Chr2	23042949	23043449	501	*	5.31	6.29	-0.14	6.43	9.74e-08	3.2e-06	Promoter (1-2kb)	5	23044550	23047396	2847	1	LOC_Os02g38120.1	-1101	LOC_Os02g38120.1	LOC_Os02g38120	0	Os02g0594700	BTBN3 - Bric-a-Brac, Tramtrack, Broad Complex BTB domain with non-phototropic hypocotyl 3 NPH3 domain, expressed
LOC_Os02g38120	126.491	69.425	-0.868	0.0003338	Chr2	23050685	23051185	501	*	7.05	7.51	6.36	1.15	0.000266	0.00229	Distal Intergenic	5	23044550	23047396	2847	1	LOC_Os02g38120.1	6135				Os02g0594700	BTBN3 - Bric-a-Brac, Tramtrack, Broad Complex BTB domain with non-phototropic hypocotyl 3 NPH3 domain, expressed
LOC_Os02g38970	85.706	33.999	-1.34	1.46e-05	Chr2	23545896	23546396	501	*	5.69	6.59	2.89	3.7	0.000193	0.00173	Exon (LOC_Os02g38970.1/LOC_Os02g38970, exon 2 of 3)	5	23545518	23549147	3630	1	LOC_Os02g38970.2	378	LOC_Os02g38970.1;LOC_Os02g38970.2;LOC_Os02g38980.4;LOC_Os02g38980.1;LOC_Os02g38980.3	LOC_Os02g38970;LOC_Os02g38970;LOC_Os02g38980;LOC_Os02g38980;LOC_Os02g38980	0;0;7984;7986;7986	Os02g0601700	expressed protein
LOC_Os02g39340	986.188	643.481	-0.617	1.656e-11	Chr2	23748232	23748732	501	*	5.49	6.26	3.76	2.5	0.000239	0.00208	3' UTR	5	23745236	23748974	3739	1	LOC_Os02g39340.1	2996	LOC_Os02g39340.2;LOC_Os02g39340.1;LOC_Os02g39350.1	LOC_Os02g39340;LOC_Os02g39340;LOC_Os02g39350	2996;0;4504	Os02g0606000	glycine-rich protein, putative, expressed	OsDG2	seedling|chloroplast|leaf	The rice OsDG2 encoding a glycine-rich protein is involved in the regulation of chloroplast development during early seedling stage
LOC_Os02g39710	1919.28	1038.06	-0.886	5.462e-25	Chr2	23990248	23990748	501	*	6.26	7	4.67	2.33	0.00625	0.0286	Exon (LOC_Os02g39710.1/LOC_Os02g39710, exon 1 of 2)	5	23989750	23991293	1544	1	LOC_Os02g39710.1	498	LOC_Os02g39710.1;LOC_Os02g39720.4;LOC_Os02g39720.6;LOC_Os02g39720.2;LOC_Os02g39720.3	LOC_Os02g39710;LOC_Os02g39720;LOC_Os02g39720;LOC_Os02g39720;LOC_Os02g39720	0;0;0;0;0	Os02g0610500	CCT/B-box zinc finger protein, putative, expressed	OsCOL4	flower	OsCOL4 is a constitutive flowering repressor upstream of Ehd1 and downstream of OsphyB
LOC_Os02g41630	41285.2	22467.4	-0.878	2.813e-50	Chr2	24973839	24974339	501	*	5.92	6.84	2.56	4.28	2.87e-07	7.17e-06	Exon (LOC_Os02g41630.2/LOC_Os02g41630, exon 2 of 2)	5	24973386	24977336	3951	2	LOC_Os02g41630.2	2997	LOC_Os02g41630.2	LOC_Os02g41630	0	Os02g0626100	phenylalanine ammonia-lyase, putative, expressed
LOC_Os02g41650	15611.3	6382.21	-1.29	4.363e-120	Chr2	24988842	24989342	501	*	5.68	6.67	-0.14	6.81	6.4e-09	4.86e-07	Promoter (<=1kb)	5	24984871	24989388	4518	2	LOC_Os02g41650.3	46	LOC_Os02g41650.3;LOC_Os02g41650.2;LOC_Os02g41650.1	LOC_Os02g41650;LOC_Os02g41650;LOC_Os02g41650	0;-1292;0	Os02g0626400	phenylalanine ammonia-lyase, putative, expressed	OsPAL
LOC_Os02g41680	777.667	249.026	-1.645	9.281e-46	Chr2	25007300	25007800	501	*	5.84	6.75	2.79	3.96	1.66e-05	0.000208	Exon (LOC_Os02g41680.1/LOC_Os02g41680, exon 2 of 2)	5	25006467	25009121	2655	2	LOC_Os02g41680.1	1321	LOC_Os02g41680.1	LOC_Os02g41680	0	Os02g0627100	phenylalanine ammonia-lyase, putative, expressed	PAL|OsPAL4	sheath|disease|blast|blight|breeding|resistance	Rice phenylalanine ammonia-lyase gene OsPAL4 is associated with broad spectrum disease resistance.
LOC_Os02g41780	22.559	2.076	-3.415	6.205e-05	Chr2	25118482	25118982	501	*	4.74	5.72	-0.14	5.86	3.22e-06	5.08e-05	Promoter (<=1kb)	5	25119033	25122992	3960	1	LOC_Os02g41780.1	-51	LOC_Os02g41780.1	LOC_Os02g41780	0	Os02g0628200	transporter-related, putative, expressed
LOC_Os02g43280	349.058	126.401	-1.46	3.391e-20	Chr2	26083281	26083781	501	*	5.88	6.39	5.09	1.3	0.00663	0.0299	Exon (LOC_Os02g43280.1/LOC_Os02g43280, exon 4 of 10)	5	26079797	26085572	5776	1	LOC_Os02g43280.2	3484	LOC_Os02g43280.1;LOC_Os02g43280.2	LOC_Os02g43280;LOC_Os02g43280	0;0	Os02g0647900	aldehyde dehydrogenase, putative, expressed
LOC_Os02g43360	293.162	178.911	-0.714	8.745e-06	Chr2	26163686	26164186	501	*	5.58	6.56	-0.14	6.7	9.37e-09	6.4e-07	Promoter (<=1kb)	5	26163059	26164221	1163	2	LOC_Os02g43360.1	35	LOC_Os02g43350.1;LOC_Os02g43360.1	LOC_Os02g43350;LOC_Os02g43360	0;0	Os02g0649800	cytochrome b5-like Heme/Steroid binding domain containing protein, expressed
LOC_Os02g43820	42.825	18.244	-1.244	0.007435	Chr2	26452547	26453047	501	*	6.49	6.96	5.78	1.19	0.00105	0.00715	Distal Intergenic	5	26456450	26457994	1545	1	LOC_Os02g43820.1	-3403				Os02g0655200	AP2 domain containing protein, expressed	OsSta2	salt|tolerance|salt stress|stress|Ubiquitin|stress tolerance	Ectopic Expression of OsSta2 Enhances Salt Stress Tolerance in Rice.
LOC_Os02g43820	42.825	18.244	-1.244	0.007435	Chr2	26462361	26462861	501	*	5.65	6.44	3.77	2.67	5.67e-05	0.000603	Downstream (2-3kb)	5	26456450	26457994	1545	1	LOC_Os02g43820.1	5911	LOC_Os02g43830.1	LOC_Os02g43830	6419	Os02g0655200	AP2 domain containing protein, expressed	OsSta2	salt|tolerance|salt stress|stress|Ubiquitin|stress tolerance	Ectopic Expression of OsSta2 Enhances Salt Stress Tolerance in Rice.
LOC_Os02g43870	78.473	49.421	-0.675	0.03305	Chr2	26497699	26498199	501	*	5.39	6.37	-0.14	6.51	1.25e-07	3.84e-06	Promoter (<=1kb)	5	26494499	26497710	3212	2	LOC_Os02g43870.1	0	LOC_Os02g43870.1;LOC_Os02g43880.1;LOC_Os02g43890.1;LOC_Os02g43900.1	LOC_Os02g43870;LOC_Os02g43880;LOC_Os02g43890;LOC_Os02g43900	0;1100;-1569;0	Os02g0655800	inactive receptor kinase At2g26730 precursor, putative, expressed
LOC_Os02g43870	78.473	49.421	-0.675	0.03305	Chr2	26496670	26497170	501	*	5.77	6.27	5	1.27	0.00915	0.038	Exon (LOC_Os02g43870.1/LOC_Os02g43870, exon 1 of 2)	5	26494499	26497710	3212	2	LOC_Os02g43870.1	540	LOC_Os02g43865.1;LOC_Os02g43870.1;LOC_Os02g43880.1;LOC_Os02g43890.1	LOC_Os02g43865;LOC_Os02g43870;LOC_Os02g43880;LOC_Os02g43890	0;0;2129;-2598	Os02g0655800	inactive receptor kinase At2g26730 precursor, putative, expressed
LOC_Os02g43970	53.753	17.385	-1.618	0.0001009	Chr2	26551336	26551836	501	*	6.39	7.03	5.21	1.82	5.48e-05	0.000586	3' UTR	5	26550915	26552218	1304	1	LOC_Os02g43970.1	421	LOC_Os02g43970.1	LOC_Os02g43970	0	Os02g0657000	AP2 domain containing protein, expressed	ARAG1	drought tolerance|inflorescence| ABA |root|growth|seed germination|drought|seed|seedling	ARAG1, an ABA-responsive DREB gene, plays a role in seed germination and drought tolerance of rice
LOC_Os02g44108	64.296	4.515	-3.818	1.63e-13	Chr2	26649446	26649946	501	*	6.1	6.83	4.57	2.25	0.00106	0.0072	Exon (LOC_Os02g44108.1/LOC_Os02g44108, exon 3 of 4)	5	26648837	26650607	1771	1	LOC_Os02g44108.1	609	LOC_Os02g44108.1	LOC_Os02g44108	0	Os02g0658800	expansin precursor, putative, expressed
LOC_Os02g44360	630.443	266.082	-1.243	2.587e-28	Chr2	26841694	26842194	501	*	5.33	6.31	-0.14	6.45	2.58e-07	6.64e-06	5' UTR	5	26841585	26844331	2747	1	LOC_Os02g44360.1	109	LOC_Os02g44360.1	LOC_Os02g44360	0	Os02g0662700	scarecrow transcription factor family protein, putative, expressed	OsSCL6-IIb
LOC_Os02g44940	1046.39	634.127	-0.726	1.219e-13	Chr2	27228026	27228526	501	*	5.68	6.43	4.04	2.39	0.000117	0.00113	Promoter (<=1kb)	5	27228829	27229723	895	1	LOC_Os02g44940.1	-303	LOC_Os02g44930.1;LOC_Os02g44940.1	LOC_Os02g44930;LOC_Os02g44940	0;0	Os02g0670500	RALFL8 - Rapid ALkalinization Factor RALF family protein precursor, expressed
LOC_Os02g45150	104.344	66.662	-0.643	0.01663	Chr2	27388223	27388723	501	*	7.03	7.52	6.29	1.24	0.000818	0.00583	3' UTR	5	27386926	27388941	2016	1	LOC_Os02g45150.1	1297	LOC_Os02g45150.2;LOC_Os02g45150.1;LOC_Os02g45160.1	LOC_Os02g45150;LOC_Os02g45150;LOC_Os02g45160	0;0;0	Os02g0673000	expressed protein
LOC_Os02g45310	332.676	196.556	-0.757	7.294e-07	Chr2	27538261	27538761	501	*	5.41	6.28	2.89	3.39	0.00123	0.00807	Distal Intergenic	5	27530822	27534623	3802	2	LOC_Os02g45310.1	-3638				Os02g0675700	dehydration response related protein, putative, expressed
LOC_Os02g45310	332.676	196.556	-0.757	7.294e-07	Chr2	27535349	27535849	501	*	6.47	7.03	5.57	1.46	0.000832	0.00591	Promoter (<=1kb)	5	27530822	27534623	3802	2	LOC_Os02g45310.1	-726	LOC_Os02g45310.1	LOC_Os02g45310	0	Os02g0675700	dehydration response related protein, putative, expressed
LOC_Os02g45310	332.676	196.556	-0.757	7.294e-07	Chr2	27531169	27531669	501	*	5.33	6.28	1.27	5.01	1.1e-07	3.5e-06	3' UTR	5	27530822	27534623	3802	2	LOC_Os02g45310.1	2954	LOC_Os02g45310.1	LOC_Os02g45310	0	Os02g0675700	dehydration response related protein, putative, expressed
LOC_Os02g45710	241.551	154.517	-0.64	0.0002318	Chr2	27808664	27809164	501	*	5.94	6.67	4.39	2.27	5.92e-05	0.000627	Promoter (<=1kb)	5	27807052	27808334	1283	2	LOC_Os02g45710.1	-330	LOC_Os02g45710.1	LOC_Os02g45710	0	Os02g0681200	zinc finger, C3HC4 type domain containing protein, expressed
LOC_Os02g45760	97.958	64.102	-0.607	0.0477	Chr2	27847303	27847803	501	*	5.73	6.47	4.13	2.34	2.97e-05	0.000346	Distal Intergenic	5	27853853	27856163	2311	2	LOC_Os02g45760.1	8360				Os02g0681900	chitin-inducible gibberellin-responsive protein 2, putative, expressed
LOC_Os02g45760	97.958	64.102	-0.607	0.0477	Chr2	27849164	27849664	501	*	6.18	6.68	5.39	1.29	0.00222	0.0129	Distal Intergenic	5	27853853	27856163	2311	2	LOC_Os02g45760.1	6499				Os02g0681900	chitin-inducible gibberellin-responsive protein 2, putative, expressed
LOC_Os02g45760	97.958	64.102	-0.607	0.0477	Chr2	27853063	27853563	501	*	5.72	6.61	2.98	3.62	0.00029	0.00246	Downstream (<1kb)	5	27853853	27856163	2311	2	LOC_Os02g45760.1	2600	LOC_Os02g45760.1	LOC_Os02g45760	0	Os02g0681900	chitin-inducible gibberellin-responsive protein 2, putative, expressed
LOC_Os02g46220	1461.53	961.025	-0.605	8.892e-15	Chr2	28169547	28170047	501	*	6.16	6.92	4.45	2.47	1.78e-06	3.1e-05	Distal Intergenic	5	28160250	28162177	1928	2	LOC_Os02g46220.1	-7370				Os02g0687500	expressed protein
LOC_Os02g46220	1461.53	961.025	-0.605	8.892e-15	Chr2	28159685	28160185	501	*	5.85	6.55	4.47	2.08	0.000745	0.0054	Downstream (<1kb)	5	28160250	28162177	1928	2	LOC_Os02g46220.1	1992	LOC_Os02g46220.1	LOC_Os02g46220	0	Os02g0687500	expressed protein
LOC_Os02g46220	1461.53	961.025	-0.605	8.892e-15	Chr2	28170188	28170688	501	*	5.6	6.23	4.46	1.78	0.00632	0.0289	Distal Intergenic	5	28160250	28162177	1928	2	LOC_Os02g46220.1	-8011				Os02g0687500	expressed protein
LOC_Os02g46600	70.173	39.348	-0.833	0.01579	Chr2	28422580	28423080	501	*	5.37	6.28	2.29	3.98	2.19e-05	0.000265	5' UTR	5	28421053	28423988	2936	2	LOC_Os02g46600.1	908	LOC_Os02g46600.1	LOC_Os02g46600	0	Os02g0692000	RING-H2 finger protein ATL5G, putative, expressed
LOC_Os02g46600	70.173	39.348	-0.833	0.01579	Chr2	28413663	28414163	501	*	6.1	6.77	4.84	1.93	0.000156	0.00145	Distal Intergenic	5	28421053	28423988	2936	2	LOC_Os02g46600.1	9825				Os02g0692000	RING-H2 finger protein ATL5G, putative, expressed
LOC_Os02g46600	70.173	39.348	-0.833	0.01579	Chr2	28428209	28428709	501	*	5.54	6.15	4.44	1.72	0.00362	0.0189	Distal Intergenic	5	28421053	28423988	2936	2	LOC_Os02g46600.1	-4221				Os02g0692000	RING-H2 finger protein ATL5G, putative, expressed
LOC_Os02g46970	429.436	174.639	-1.298	7.964e-23	Chr2	28678461	28678961	501	*	5.91	6.49	4.93	1.55	0.00188	0.0113	Exon (LOC_Os02g46970.1/LOC_Os02g46970, exon 2 of 6)	5	28677203	28680902	3700	2	LOC_Os02g46970.1	1941	LOC_Os02g46962.1;LOC_Os02g46962.2;LOC_Os02g46962.3;LOC_Os02g46970.1;LOC_Os02g46980.1	LOC_Os02g46962;LOC_Os02g46962;LOC_Os02g46962;LOC_Os02g46970;LOC_Os02g46980	0;0;4881;0;0	Os02g0697400	AMP-binding domain containing protein, expressed	Os4CL2
LOC_Os02g47420	41.137	12.338	-1.744	0.000339	Chr2	28959219	28959719	501	*	6.74	7.3	5.81	1.49	8.87e-05	0.000889	Promoter (<=1kb)	5	28952897	28959125	6229	2	LOC_Os02g47420.1	-94	LOC_Os02g47420.4;LOC_Os02g47420.2;LOC_Os02g47420.1;LOC_Os02g47420.3	LOC_Os02g47420;LOC_Os02g47420;LOC_Os02g47420;LOC_Os02g47420	0;0;0;0	Os02g0702600	ATROPGEF7/ROPGEF7, putative, expressed
LOC_Os02g47420	41.137	12.338	-1.744	0.000339	Chr2	28958554	28959054	501	*	5.65	6.64	-0.14	6.78	6.36e-09	4.86e-07	Promoter (<=1kb)	5	28953036	28958823	5788	2	LOC_Os02g47420.3	0	LOC_Os02g47420.4;LOC_Os02g47420.2;LOC_Os02g47420.1;LOC_Os02g47420.3	LOC_Os02g47420;LOC_Os02g47420;LOC_Os02g47420;LOC_Os02g47420	0;0;0;0	Os02g0702600	ATROPGEF7/ROPGEF7, putative, expressed
LOC_Os02g47420	41.137	12.338	-1.744	0.000339	Chr2	28952955	28953455	501	*	5.56	6.55	-0.14	6.69	8.15e-09	5.81e-07	3' UTR	5	28952897	28957973	5077	2	LOC_Os02g47420.4	4518	LOC_Os02g47420.4;LOC_Os02g47420.2;LOC_Os02g47420.1;LOC_Os02g47420.3	LOC_Os02g47420;LOC_Os02g47420;LOC_Os02g47420;LOC_Os02g47420	0;0;0;0	Os02g0702600	ATROPGEF7/ROPGEF7, putative, expressed
LOC_Os02g47570	594.901	371.82	-0.677	2.87e-09	Chr2	29069409	29069909	501	*	5.41	6.27	2.98	3.29	0.00158	0.00986	Promoter (<=1kb)	5	29069440	29071177	1738	1	LOC_Os02g47570.2	0	LOC_Os02g47570.2;LOC_Os02g47570.1;LOC_Os02g47580.1	LOC_Os02g47570;LOC_Os02g47570;LOC_Os02g47580	0;0;6579	Os02g0704500	phosphatase, putative, expressed
LOC_Os02g47620	414.923	242.611	-0.772	1.941e-08	Chr2	29099716	29100216	501	*	5.53	6.37	3.23	3.14	3.61e-07	8.5e-06	Exon (LOC_Os02g47620.1/LOC_Os02g47620, exon 4 of 4)	5	29098995	29101290	2296	2	LOC_Os02g47620.1	1074	LOC_Os02g47610.1;LOC_Os02g47620.1;LOC_Os02g47620.2;LOC_Os02g47620.3	LOC_Os02g47610;LOC_Os02g47620;LOC_Os02g47620;LOC_Os02g47620	-2265;0;0;0	Os02g0705100	hydrolase, alpha/beta fold family domain containing protein, expressed
LOC_Os02g47810	21.211	6.557	-1.671	0.01931	Chr2	29238915	29239415	501	*	5.72	6.5	3.86	2.65	1.85e-05	0.000229	Exon (LOC_Os02g47810.1/LOC_Os02g47810, exon 2 of 2)	5	29238064	29241762	3699	2	LOC_Os02g47810.1	2347	LOC_Os02g47810.1	LOC_Os02g47810	0	Os02g0707200	dof zinc finger domain containing protein, putative, expressed	OsDOF11	transcription factor|seedlings|root|root elongation|transporter|sugar|sucrose|As transport|sucrose transporter	Rice Transcription Factor OsDOF11 Modulates Sugar Transport by Promoting Expression of Sucrose Transporter and SWEET genes.
LOC_Os02g47810	21.211	6.557	-1.671	0.01931	Chr2	29243624	29244124	501	*	5.99	6.56	5.04	1.52	0.00866	0.0366	Promoter (1-2kb)	5	29238064	29241762	3699	2	LOC_Os02g47810.1	-1862	LOC_Os02g47810.1	LOC_Os02g47810	0	Os02g0707200	dof zinc finger domain containing protein, putative, expressed	OsDOF11	transcription factor|seedlings|root|root elongation|transporter|sugar|sucrose|As transport|sucrose transporter	Rice Transcription Factor OsDOF11 Modulates Sugar Transport by Promoting Expression of Sucrose Transporter and SWEET genes.
LOC_Os02g48570	321.904	119.133	-1.431	1.204e-19	Chr2	29737844	29738344	501	*	6.65	7.35	5.24	2.12	7.4e-06	0.000103	Exon (LOC_Os02g48570.2/LOC_Os02g48570, exon 5 of 6)	5	29736163	29739722	3560	2	LOC_Os02g48570.2	1378	LOC_Os02g48570.2;LOC_Os02g48570.1	LOC_Os02g48570;LOC_Os02g48570	0;0	Os02g0716800	peptide transporter PTR2, putative, expressed
LOC_Os02g48850	135.431	15.477	-3.132	1.233e-21	Chr2	29886513	29887013	501	*	6.24	7.14	3.3	3.83	5.85e-06	8.42e-05	Exon (LOC_Os02g48850.1/LOC_Os02g48850, exon 1 of 1)	5	29886240	29887103	864	1	LOC_Os02g48850.1	273	LOC_Os02g48840.1;LOC_Os02g48850.1;LOC_Os02g48860.1	LOC_Os02g48840;LOC_Os02g48850;LOC_Os02g48860	4447;0;0	Os02g0720400	plant-specific domain TIGR01615 family protein, expressed
LOC_Os02g48900	1675.31	969.934	-0.787	3.423e-25	Chr2	29912404	29912904	501	*	5.33	6.17	3.07	3.1	0.00427	0.0215	Promoter (<=1kb)	5	29913753	29916317	2565	1	LOC_Os02g48900.2	-849	LOC_Os02g48900.1;LOC_Os02g48900.2	LOC_Os02g48900;LOC_Os02g48900	0;0	Os02g0720900	aspartic proteinase nepenthesin-1 precursor, putative, expressed
LOC_Os02g49060	46.453	12.4	-1.897	7.004e-05	Chr2	29996664	29997164	501	*	6.11	6.85	4.51	2.34	9.28e-08	3.09e-06	Exon (LOC_Os02g49060.1/LOC_Os02g49060, exon 5 of 7)	5	29991786	29998805	7020	1	LOC_Os02g49060.1	4878	LOC_Os02g49060.1;LOC_Os02g49070.1	LOC_Os02g49060;LOC_Os02g49070	0;0	Os02g0722400	amino acid transporter, putative, expressed
LOC_Os02g49550	110.027	56.202	-0.966	0.00174	Chr2	30282646	30283146	501	*	6.21	6.69	5.51	1.18	0.00391	0.0201	Exon (LOC_Os02g49550.1/LOC_Os02g49550, exon 1 of 1)	5	30282358	30284007	1650	1	LOC_Os02g49550.1	288	LOC_Os02g49540.1;LOC_Os02g49550.1	LOC_Os02g49540;LOC_Os02g49550	0;0	Os02g0727700	zinc finger, C3HC4 type domain containing protein, expressed
LOC_Os02g50340	82.001	26.928	-1.607	5.436e-06	Chr2	30741368	30741868	501	*	4.87	5.85	-0.14	5.99	2.18e-06	3.65e-05	Exon (LOC_Os02g50340.1/LOC_Os02g50340, exon 2 of 8)	5	30736687	30743642	6956	2	LOC_Os02g50340.1	1774	LOC_Os02g50340.1	LOC_Os02g50340	0	Os02g0736300	membrane attack complex component/perforin/complement C9, putative, expressed
LOC_Os02g50740	76.326	17.002	-2.17	1.297e-09	Chr2	30987771	30988271	501	*	6.27	6.76	5.53	1.24	0.00339	0.018	3' UTR	5	30986860	30988403	1544	1	LOC_Os02g50740.1	911	LOC_Os02g50740.1;LOC_Os02g50750.1	LOC_Os02g50740;LOC_Os02g50750	0;-1037	Os02g0740900	WD domain, G-beta repeat domain containing protein, expressed
LOC_Os02g50960	470.513	391.089	-0.596	0.03189	Chr2	31166243	31166743	501	*	5.62	6.54	2.43	4.1	4.21e-06	6.35e-05	Distal Intergenic	5	31158903	31162062	3160	2	LOC_Os02g50960.1	-4181				Os02g0743400	auxin efflux carrier component, putative, expressed	OsPIN1|REH1|PIN1b|OsPIN1b	auxin|root|ethylene|tiller number|shoot|tillering|adventitious root|tiller|panicle|development|inflorescence	A PIN1 family gene, OsPIN1, involved in auxin-dependent adventitious root emergence and tillering in rice|Functional divergence of PIN1 paralogous genes in rice.
LOC_Os02g50960	470.513	391.089	-0.596	0.03189	Chr2	31161318	31161818	501	*	5.59	6.53	1.9	4.63	8.46e-09	5.96e-07	Exon (LOC_Os02g50960.2/LOC_Os02g50960, exon 1 of 5)	5	31158903	31161998	3096	2	LOC_Os02g50960.2	180	LOC_Os02g50960.2;LOC_Os02g50960.1	LOC_Os02g50960;LOC_Os02g50960	0;0	Os02g0743400	auxin efflux carrier component, putative, expressed	OsPIN1|REH1|PIN1b|OsPIN1b	auxin|root|ethylene|tiller number|shoot|tillering|adventitious root|tiller|panicle|development|inflorescence	A PIN1 family gene, OsPIN1, involved in auxin-dependent adventitious root emergence and tillering in rice|Functional divergence of PIN1 paralogous genes in rice.
LOC_Os02g51480	1896.2	1018.08	-0.898	1.001e-35	Chr2	31529578	31530078	501	*	4.78	5.75	-0.14	5.89	2.66e-06	4.32e-05	Promoter (<=1kb)	5	31529599	31531859	2261	1	LOC_Os02g51480.1	0	LOC_Os02g51470.3;LOC_Os02g51470.1;LOC_Os02g51470.2;LOC_Os02g51480.1;LOC_Os02g51490.1	LOC_Os02g51470;LOC_Os02g51470;LOC_Os02g51470;LOC_Os02g51480;LOC_Os02g51490	2674;2658;2658;0;0	Os02g0750400	PPR repeat domain containing protein, putative, expressed
LOC_Os02g51890	37.927	14.34	-1.39	0.004125	Chr2	31782181	31782681	501	*	5.94	6.84	3.07	3.77	4.21e-05	0.000468	Exon (LOC_Os02g51890.1/LOC_Os02g51890, exon 2 of 6)	5	31781325	31787892	6568	1	LOC_Os02g51890.2	856	LOC_Os02g51890.1;LOC_Os02g51890.2	LOC_Os02g51890;LOC_Os02g51890	0;0	Os02g0755400	RNA recognition motif containing protein, putative, expressed
LOC_Os02g51930	228.309	69.84	-1.708	1.345e-19	Chr2	31806788	31807288	501	*	5.64	6.48	3.38	3.1	0.00386	0.0199	Exon (LOC_Os02g51930.1/LOC_Os02g51930, exon 2 of 2)	5	31805977	31807891	1915	1	LOC_Os02g51930.1	811	LOC_Os02g51930.1	LOC_Os02g51930	0	Os02g0755900	cytokinin-O-glucosyltransferase 2, putative, expressed
LOC_Os02g52460	46.963	19.813	-1.242	0.003943	Chr2	32099149	32099649	501	*	5.74	6.3	4.83	1.47	0.00372	0.0193	Promoter (<=1kb)	5	32095322	32098710	3389	2	LOC_Os02g52460.1	-439	LOC_Os02g52460.1;LOC_Os02g52470.1;LOC_Os02g52470.2	LOC_Os02g52460;LOC_Os02g52470;LOC_Os02g52470	0;0;0	Os02g0762200	zinc knuckle domain containing protein, expressed
LOC_Os02g52930	12.964	1.829	-2.831	0.006538	Chr2	32359756	32360256	501	*	6.64	7.4	4.91	2.49	0.000754	0.00545	Exon (LOC_Os02g52930.1/LOC_Os02g52930, exon 4 of 6)	5	32359101	32362011	2911	2	LOC_Os02g52930.1	1755	LOC_Os02g52930.1	LOC_Os02g52930	0	Os02g0768300	integral membrane protein DUF6 containing protein, expressed
LOC_Os02g53530	593.393	290.708	-1.031	4.868e-17	Chr2	32746775	32747275	501	*	6.96	7.42	6.28	1.13	0.000861	0.00607	Downstream (2-3kb)	5	32750101	32751400	1300	2	LOC_Os02g53530.1	4125	LOC_Os02g53530.1	LOC_Os02g53530	0	Os02g0775600	ZOS2-17 - C2H2 zinc finger protein, expressed
LOC_Os02g53530	593.393	290.708	-1.031	4.868e-17	Chr2	32752335	32752835	501	*	6.3	6.82	5.47	1.35	0.00202	0.012	Promoter (<=1kb)	5	32750101	32751400	1300	2	LOC_Os02g53530.1	-935	LOC_Os02g53530.1	LOC_Os02g53530	0	Os02g0775600	ZOS2-17 - C2H2 zinc finger protein, expressed
LOC_Os02g53580	55.878	20.041	-1.475	0.0003642	Chr2	32778338	32778838	501	*	5.21	6.19	-0.14	6.33	2.47e-07	6.45e-06	Promoter (<=1kb)	5	32778185	32778764	580	2	LOC_Os02g53580.1	0	LOC_Os02g53570.1;LOC_Os02g53580.1;LOC_Os02g53590.1	LOC_Os02g53570;LOC_Os02g53580;LOC_Os02g53590	0;0;0	Os02g0775900	expressed protein
LOC_Os02g53720	95.151	53.506	-0.825	0.004174	Chr2	32882306	32882806	501	*	6.06	6.78	4.54	2.24	5.88e-05	0.000623	Distal Intergenic	5	32886843	32889742	2900	1	LOC_Os02g53720.1	-4037				Os02g0777400	phytosulfokine receptor precursor, putative, expressed	OsER2	growth|panicle|cell proliferation|panicle size|plant stature	Phylogenetic and CRISPR/Cas9 Studies in Deciphering the Evolutionary Trajectory and Phenotypic Impacts of Rice ERECTA Genes.
LOC_Os02g53750	2447.31	1059.28	-1.208	2.332e-65	Chr2	32915702	32916202	501	*	6.46	7.12	5.21	1.91	1.43e-05	0.000183	3' UTR	5	32915308	32918514	3207	2	LOC_Os02g53750.1	2312	LOC_Os02g53740.2;LOC_Os02g53740.3;LOC_Os02g53750.1;LOC_Os02g53750.2	LOC_Os02g53740;LOC_Os02g53740;LOC_Os02g53750;LOC_Os02g53750	11121;11121;0;0	Os02g0777800	tyrosine protein kinase domain containing protein, putative, expressed
LOC_Os02g53750	2447.31	1059.28	-1.208	2.332e-65	Chr2	32917494	32917994	501	*	5.87	6.55	4.55	2	0.000719	0.00524	5' UTR	5	32915308	32918514	3207	2	LOC_Os02g53750.1	520	LOC_Os02g53750.1;LOC_Os02g53750.2	LOC_Os02g53750;LOC_Os02g53750	0;0	Os02g0777800	tyrosine protein kinase domain containing protein, putative, expressed
LOC_Os02g53750	2447.31	1059.28	-1.208	2.332e-65	Chr2	32918057	32918557	501	*	5	5.98	-0.14	6.12	7.9e-07	1.57e-05	Promoter (<=1kb)	5	32915308	32918514	3207	2	LOC_Os02g53750.1	0	LOC_Os02g53750.1;LOC_Os02g53750.2	LOC_Os02g53750;LOC_Os02g53750	0;0	Os02g0777800	tyrosine protein kinase domain containing protein, putative, expressed
LOC_Os02g54060	1006.75	247.591	-2.026	1.143e-80	Chr2	33117879	33118379	501	*	5.43	6.25	3.38	2.87	0.00955	0.0392	Promoter (<=1kb)	5	33114780	33117303	2524	2	LOC_Os02g54060.2	-576	LOC_Os02g54060.1;LOC_Os02g54060.2	LOC_Os02g54060;LOC_Os02g54060	-576;-576	Os02g0781400	chaperonin, putative, expressed
LOC_Os02g55130	90.106	32.41	-1.476	4.202e-06	Chr2	33769452	33769952	501	*	6.19	6.87	4.84	2.04	0.00698	0.0311	Promoter (<=1kb)	5	33769412	33776524	7113	1	LOC_Os02g55130.2	40	LOC_Os02g55130.1;LOC_Os02g55130.3;LOC_Os02g55130.5;LOC_Os02g55130.2;LOC_Os02g55130.4	LOC_Os02g55130;LOC_Os02g55130;LOC_Os02g55130;LOC_Os02g55130;LOC_Os02g55130	0;0;0;0;0	Os02g0794500	OsSCP10 - Putative Serine Carboxypeptidase homologue, expressed
LOC_Os02g56030	592.595	348.388	-0.77	1.09e-08	Chr2	34299313	34299813	501	*	6.21	6.71	5.45	1.26	0.00385	0.0198	Promoter (<=1kb)	5	34299464	34301104	1641	1	LOC_Os02g56030.1	0	LOC_Os02g56014.1;LOC_Os02g56020.1;LOC_Os02g56020.2;LOC_Os02g56030.1;LOC_Os02g56040.1	LOC_Os02g56014;LOC_Os02g56020;LOC_Os02g56020;LOC_Os02g56030;LOC_Os02g56040	-2845;0;0;0;7916	Os02g0804400	expressed protein
LOC_Os02g57010	4691.78	2747.67	-0.772	1.266e-41	Chr2	34922571	34923071	501	*	5.71	6.66	1.97	4.69	2.02e-06	3.43e-05	Promoter (<=1kb)	5	34922501	34924811	2311	1	LOC_Os02g57010.1	70	LOC_Os02g56990.1;LOC_Os02g57000.1;LOC_Os02g57010.1;LOC_Os02g57020.1	LOC_Os02g56990;LOC_Os02g57000;LOC_Os02g57010;LOC_Os02g57020	0;0;0;0	Os02g0815200	RNA recognition motif containing protein, putative, expressed
LOC_Os02g57480	174.778	90.572	-0.945	1.101e-05	Chr2	35223213	35223713	501	*	5.74	6.73	-0.14	6.87	1.85e-09	2.2e-07	5' UTR	5	35222052	35224134	2083	2	LOC_Os02g57480.1	421	LOC_Os02g57470.1;LOC_Os02g57480.1	LOC_Os02g57470;LOC_Os02g57480	0;0	Os02g0820400	transferase family protein, putative, expressed
LOC_Os02g57670	5680.32	2430.19	-1.226	1.365e-81	Chr2	35324912	35325412	501	*	5.79	6.58	3.89	2.7	7.21e-05	0.000742	Promoter (1-2kb)	5	35320313	35322987	2675	2	LOC_Os02g57670.1	-1925	LOC_Os02g57670.1;LOC_Os02g57690.2	LOC_Os02g57670;LOC_Os02g57690	-1925;6508	Os02g0822600	ribosomal L9, putative, expressed
LOC_Os02g58720	100.264	43.132	-1.218	9.044e-05	Chr2	35876325	35876825	501	*	6.45	6.95	5.69	1.26	0.00634	0.0289	Exon (LOC_Os02g58720.2/LOC_Os02g58720, exon 4 of 4)	5	35875509	35876997	1489	1	LOC_Os02g58720.3	816	LOC_Os02g58720.2;LOC_Os02g58720.1;LOC_Os02g58720.3	LOC_Os02g58720;LOC_Os02g58720;LOC_Os02g58720	0;0;0	Os02g0833900	peroxidase precursor, putative, expressed
LOC_Os03g02580	289.485	149.022	-0.961	2.259e-09	Chr3	956991	957491	501	*	5.82	6.41	4.79	1.61	0.012	0.0463	3' UTR	6	955871	957478	1608	1	LOC_Os03g02580.1	1120	LOC_Os03g02580.1;LOC_Os03g02590.2;LOC_Os03g02590.4;LOC_Os03g02590.3;LOC_Os03g02600.1	LOC_Os03g02580;LOC_Os03g02590;LOC_Os03g02590;LOC_Os03g02590;LOC_Os03g02600	0;0;0;0;0	Os03g0116900	armadillo, putative, expressed
LOC_Os03g02660	24.824	10.049	-1.303	0.0326	Chr3	985774	986274	501	*	5.74	6.73	-0.14	6.87	2.19e-09	2.47e-07	Promoter (<=1kb)	6	985771	989765	3995	1	LOC_Os03g02660.1	3	LOC_Os03g02660.1	LOC_Os03g02660	0	Os03g0118100	expressed protein
LOC_Os03g02670	2447.42	1148.55	-1.092	7.117e-60	Chr3	989008	989508	501	*	7.17	7.8	6.03	1.77	0.00107	0.00726	Promoter (1-2kb)	6	991089	994725	3637	1	LOC_Os03g02670.1	-1581	LOC_Os03g02660.1;LOC_Os03g02670.1;LOC_Os03g02670.2;LOC_Os03g02670.3	LOC_Os03g02660;LOC_Os03g02670;LOC_Os03g02670;LOC_Os03g02670	0;0;0;0	Os03g0118200	transporter family protein, putative, expressed
LOC_Os03g02670	2447.42	1148.55	-1.092	7.117e-60	Chr3	993999	994499	501	*	5.18	6.06	2.63	3.42	0.000829	0.00589	3' UTR	6	991364	994725	3362	1	LOC_Os03g02670.3	2635	LOC_Os03g02670.1;LOC_Os03g02670.2;LOC_Os03g02670.3	LOC_Os03g02670;LOC_Os03g02670;LOC_Os03g02670	0;0;0	Os03g0118200	transporter family protein, putative, expressed
LOC_Os03g02670	2447.42	1148.55	-1.092	7.117e-60	Chr3	990743	991243	501	*	6.07	6.73	4.84	1.89	0.000322	0.00267	Promoter (<=1kb)	6	991089	994725	3637	1	LOC_Os03g02670.1	0	LOC_Os03g02660.1;LOC_Os03g02670.1;LOC_Os03g02670.2;LOC_Os03g02670.3	LOC_Os03g02660;LOC_Os03g02670;LOC_Os03g02670;LOC_Os03g02670	0;0;0;0	Os03g0118200	transporter family protein, putative, expressed
LOC_Os03g03164	115.994	53.377	-1.124	2.374e-05	Chr3	1340209	1340709	501	*	6.54	7.09	5.64	1.45	0.00207	0.0122	5' UTR	6	1340052	1345158	5107	1	LOC_Os03g03164.2	157	LOC_Os03g03164.2	LOC_Os03g03164	0	Os03g0123500	homeobox protein knotted-1, putative, expressed	KNAT7	growth|resistance|grain|grain size|cell wall|lodging|lodging resistance	A Rice Homeobox Protein KNAT7 Integrates the Pathways Regulating Cell Expansion And Wall Stiffness.
LOC_Os03g03164	115.994	53.377	-1.124	2.374e-05	Chr3	1334838	1335338	501	*	6.61	7.08	5.89	1.19	0.00755	0.033	Distal Intergenic	6	1340052	1345158	5107	1	LOC_Os03g03164.2	-4714				Os03g0123500	homeobox protein knotted-1, putative, expressed	KNAT7	growth|resistance|grain|grain size|cell wall|lodging|lodging resistance	A Rice Homeobox Protein KNAT7 Integrates the Pathways Regulating Cell Expansion And Wall Stiffness.
LOC_Os03g03360	12488	6978.34	-0.84	1.94e-39	Chr3	1436959	1437459	501	*	4.91	5.89	-0.14	6.03	3.47e-06	5.4e-05	Promoter (1-2kb)	6	1432787	1435347	2561	2	LOC_Os03g03360.1	-1612	LOC_Os03g03360.1;LOC_Os03g03370.1;LOC_Os03g03370.2	LOC_Os03g03360;LOC_Os03g03370;LOC_Os03g03370	0;0;0	Os03g0125000	ribosomal protein L5, putative, expressed
LOC_Os03g03470	2621.14	1250.39	-1.068	6.904e-58	Chr3	1504695	1505195	501	*	5.68	6.67	-0.14	6.81	4.23e-09	3.72e-07	Promoter (<=1kb)	6	1499639	1504242	4604	2	LOC_Os03g03470.1	-453	LOC_Os03g03470.2;LOC_Os03g03470.3;LOC_Os03g03470.4;LOC_Os03g03470.1;LOC_Os03g03480.1;LOC_Os03g03490.1	LOC_Os03g03470;LOC_Os03g03470;LOC_Os03g03470;LOC_Os03g03470;LOC_Os03g03480;LOC_Os03g03490	-453;-453;-453;-453;855;-2905	Os03g0126300	expressed protein
LOC_Os03g03724	51.486	24.591	-1.07	0.005976	Chr3	1667046	1667546	501	*	5.19	6.07	2.63	3.43	0.000646	0.00479	Promoter (<=1kb)	6	1667248	1667899	652	1	LOC_Os03g03724.2	0	LOC_Os03g03720.1;LOC_Os03g03720.2;LOC_Os03g03724.2;LOC_Os03g03724.1;LOC_Os03g03730.1;LOC_Os03g03740.1	LOC_Os03g03720;LOC_Os03g03720;LOC_Os03g03724;LOC_Os03g03724;LOC_Os03g03730;LOC_Os03g03740	0;0;0;0;0;-2258	Os03g0129400	expressed protein
LOC_Os03g03810	59.855	9.853	-2.592	6.9e-09	Chr3	1714638	1715138	501	*	6.63	7.07	5.99	1.08	0.00944	0.0389	Promoter (<=1kb)	6	1714572	1715230	659	1	LOC_Os03g03810.1	66	LOC_Os03g03800.1;LOC_Os03g03810.1;LOC_Os03g03820.1	LOC_Os03g03800;LOC_Os03g03810;LOC_Os03g03820	0;0;-1299	Os03g0130300	DEF8 - Defensin and Defensin-like DEFL family, expressed	OsDEF8	antimicrobial activity	Gene expression analysis, subcellular localization, and in planta antimicrobial activity of rice (Oryza sativa L.) defensin 7 and 8.
LOC_Os03g04870	3.968	0	-4.558	0.03463	Chr3	2328488	2328988	501	*	6.13	6.72	5.1	1.62	0.000149	0.00139	Promoter (<=1kb)	6	2328868	2331604	2737	1	LOC_Os03g04870.1	0	LOC_Os03g04870.1	LOC_Os03g04870	0	Os03g0142200	expressed protein
LOC_Os03g04870	3.968	0	-4.558	0.03463	Chr3	2330941	2331441	501	*	6.5	7.17	5.22	1.95	2.55e-07	6.59e-06	3' UTR	6	2328868	2331604	2737	1	LOC_Os03g04870.1	2073	LOC_Os03g04870.1	LOC_Os03g04870	0	Os03g0142200	expressed protein
LOC_Os03g05390	14785.8	8079.92	-0.872	6.016e-57	Chr3	2661250	2661750	501	*	6.71	7.14	6.09	1.05	0.00669	0.0301	Promoter (<=1kb)	6	2651929	2661684	9756	2	LOC_Os03g05390.8	0	LOC_Os03g05390.8;LOC_Os03g05390.3;LOC_Os03g05390.12;LOC_Os03g05390.13;LOC_Os03g05390.2;LOC_Os03g05390.7;LOC_Os03g05400.1	LOC_Os03g05390;LOC_Os03g05390;LOC_Os03g05390;LOC_Os03g05390;LOC_Os03g05390;LOC_Os03g05390;LOC_Os03g05400	0;0;0;0;0;0;4884	Os03g0147400	Citrate transporter protein, putative, expressed	Z3	leaf|leaf development|development|map-based cloning|transporter	The rice zebra3 (z3) mutation disrupts citrate distribution and produces transverse dark-green/green variegation in mature leaves.
LOC_Os03g06360	40.76	15.695	-1.367	0.006005	Chr3	3185307	3185807	501	*	6.01	6.83	3.94	2.88	2.63e-06	4.28e-05	5' UTR	6	3184492	3185937	1446	2	LOC_Os03g06360.1	130	LOC_Os03g06360.1;LOC_Os03g06360.2;LOC_Os03g06370.1;LOC_Os03g06370.2	LOC_Os03g06360;LOC_Os03g06360;LOC_Os03g06370;LOC_Os03g06370	0;0;-932;-975	Os03g0159600	late embryogenesis abundant protein D-34, putative, expressed
LOC_Os03g06360	40.76	15.695	-1.367	0.006005	Chr3	3183880	3184380	501	*	5.94	6.49	5.03	1.46	0.00811	0.0348	Downstream (<1kb)	6	3184492	3185937	1446	2	LOC_Os03g06360.1	1557	LOC_Os03g06360.1;LOC_Os03g06360.2;LOC_Os03g06370.1;LOC_Os03g06370.2	LOC_Os03g06360;LOC_Os03g06360;LOC_Os03g06370;LOC_Os03g06370	0;0;-2359;-2402	Os03g0159600	late embryogenesis abundant protein D-34, putative, expressed
LOC_Os03g06940	19.607	7.12	-1.45	0.03761	Chr3	3533220	3533720	501	*	6.95	7.4	6.3	1.1	0.00127	0.00828	Promoter (1-2kb)	6	3525078	3531357	6280	2	LOC_Os03g06940.1	-1863	LOC_Os03g06940.1;LOC_Os03g06940.2	LOC_Os03g06940;LOC_Os03g06940	-1863;-1870	Os03g0165400	beta-galactosidase, putative, expressed	OsBGal1	seedling|sheath|shoot|root|leaf|panicle	Molecular characterization of beta-galactosidases from germinating rice (Oryza sativa)
LOC_Os03g06970	157.182	88.598	-0.831	0.0003314	Chr3	3556501	3557001	501	*	5.6	6.16	4.66	1.49	0.012	0.0464	Exon (LOC_Os03g06970.1/LOC_Os03g06970, exon 2 of 3)	6	3555490	3558352	2863	2	LOC_Os03g06970.1	1351	LOC_Os03g06960.1;LOC_Os03g06970.1	LOC_Os03g06960;LOC_Os03g06970	4726;0	Os03g0165900	tetratricopeptide repeat domain containing protein, expressed
LOC_Os03g06970	157.182	88.598	-0.831	0.0003314	Chr3	3558070	3558570	501	*	6.15	6.89	4.54	2.35	7.03e-05	0.000726	Promoter (<=1kb)	6	3555490	3558352	2863	2	LOC_Os03g06970.1	0	LOC_Os03g06970.1;LOC_Os03g06980.1	LOC_Os03g06970;LOC_Os03g06980	0;6795	Os03g0165900	tetratricopeptide repeat domain containing protein, expressed
LOC_Os03g07600	636.345	416.743	-0.614	7.588e-07	Chr3	3870950	3871450	501	*	6.74	7.21	6.04	1.17	0.00187	0.0112	Promoter (<=1kb)	6	3866510	3871355	4846	2	LOC_Os03g07600.1	0	LOC_Os03g07600.1;LOC_Os03g07610.1;LOC_Os03g07620.1	LOC_Os03g07600;LOC_Os03g07610;LOC_Os03g07620	0;0;0	Os03g0172200	calcium-binding protein, putative, expressed
LOC_Os03g08080	3068.2	1632.3	-0.91	6.206e-38	Chr3	4129609	4130109	501	*	5.07	6.05	-0.14	6.19	5.09e-07	1.11e-05	Promoter (<=1kb)	6	4129653	4131193	1541	1	LOC_Os03g08080.1	0	LOC_Os03g08070.1;LOC_Os03g08070.2;LOC_Os03g08070.3;LOC_Os03g08080.1;LOC_Os03g08090.1;LOC_Os03g08090.2	LOC_Os03g08070;LOC_Os03g08070;LOC_Os03g08070;LOC_Os03g08080;LOC_Os03g08090;LOC_Os03g08090	0;0;0;0;0;0	Os03g0178200	YGGT family protein, putative, expressed
LOC_Os03g08100	65.938	34.802	-0.914	0.007932	Chr3	4135035	4135535	501	*	5.03	5.66	3.87	1.79	0.00883	0.0371	Intron (LOC_Os03g08100.1/LOC_Os03g08100, intron 1 of 3)	6	4133458	4136490	3033	2	LOC_Os03g08100.1	955	LOC_Os03g08090.1;LOC_Os03g08090.2;LOC_Os03g08100.1;LOC_Os03g08100.2;LOC_Os03g08110.1	LOC_Os03g08090;LOC_Os03g08090;LOC_Os03g08100;LOC_Os03g08100;LOC_Os03g08110	0;0;0;0;0	Os03g0178400	hydrolase, alpha/beta fold family protein, putative, expressed
LOC_Os03g08100	65.938	34.802	-0.914	0.007932	Chr3	4138839	4139339	501	*	5.82	6.65	3.7	2.95	7.97e-07	1.58e-05	Promoter (2-3kb)	6	4133458	4136490	3033	2	LOC_Os03g08100.2	-2349	LOC_Os03g08100.1;LOC_Os03g08100.2;LOC_Os03g08110.1	LOC_Os03g08100;LOC_Os03g08100;LOC_Os03g08110	0;0;0	Os03g0178400	hydrolase, alpha/beta fold family protein, putative, expressed
LOC_Os03g08330	54.339	22.932	-1.256	0.00365	Chr3	4249016	4249516	501	*	6.51	7.05	5.64	1.42	0.0119	0.0462	5' UTR	6	4248884	4249985	1102	1	LOC_Os03g08330.1	132	LOC_Os03g08330.1	LOC_Os03g08330	0	Os03g0181100	ZIM domain containing protein, putative, expressed	OsJAZ10
LOC_Os03g08360	1288.72	800.868	-0.687	7.173e-17	Chr3	4270689	4271189	501	*	6.76	7.33	5.81	1.52	0.00269	0.0149	Exon (LOC_Os03g08360.1/LOC_Os03g08360, exon 2 of 2)	6	4270139	4271866	1728	1	LOC_Os03g08360.4	550	LOC_Os03g08360.1;LOC_Os03g08360.3;LOC_Os03g08360.4;LOC_Os03g08370.1	LOC_Os03g08360;LOC_Os03g08360;LOC_Os03g08360;LOC_Os03g08370	0;0;0;-1681	Os03g0181500	3-ketoacyl-CoA synthase 10, putative, expressed	ONI1	shoot|shoot apical meristem|meristem	Fatty acid elongase is required for shoot development in rice
LOC_Os03g08390	286.701	173.51	-0.729	4.427e-05	Chr3	4284488	4284988	501	*	4.93	5.91	-0.14	6.05	9.96e-07	1.9e-05	Promoter (2-3kb)	6	4287335	4291864	4530	1	LOC_Os03g08390.1	-2347	LOC_Os03g08380.1;LOC_Os03g08390.1;LOC_Os03g08390.2	LOC_Os03g08380;LOC_Os03g08390;LOC_Os03g08390	0;0;0	Os03g0181800	expressed protein
LOC_Os03g08390	286.701	173.51	-0.729	4.427e-05	Chr3	4291204	4291704	501	*	5.4	6.07	4.09	1.99	0.00236	0.0135	3' UTR	6	4287356	4291864	4509	1	LOC_Os03g08390.2	3848	LOC_Os03g08390.1;LOC_Os03g08390.2;LOC_Os03g08400.1	LOC_Os03g08390;LOC_Os03g08390;LOC_Os03g08400	0;0;5753	Os03g0181800	expressed protein
LOC_Os03g09070	21.021	7.773	-1.432	0.04142	Chr3	4704179	4704679	501	*	6.76	7.31	5.87	1.45	0.00709	0.0315	Exon (LOC_Os03g09070.1/LOC_Os03g09070, exon 2 of 4)	6	4701964	4705495	3532	2	LOC_Os03g09070.1	816	LOC_Os03g09070.1	LOC_Os03g09070	0	Os03g0190300	leucine rich repeat domain containing protein, putative, expressed
LOC_Os03g09070	21.021	7.773	-1.432	0.04142	Chr3	4702921	4703421	501	*	5.14	6.12	-0.14	6.26	6.19e-07	1.29e-05	Exon (LOC_Os03g09070.1/LOC_Os03g09070, exon 3 of 4)	6	4701964	4705495	3532	2	LOC_Os03g09070.1	2074	LOC_Os03g09060.1;LOC_Os03g09070.1	LOC_Os03g09060;LOC_Os03g09070	0;0	Os03g0190300	leucine rich repeat domain containing protein, putative, expressed
LOC_Os03g09850	141.119	85.552	-0.714	0.002216	Chr3	4901446	4901946	501	*	6.28	6.83	5.36	1.47	0.000428	0.00341	Downstream (<1kb)	6	4901969	4903749	1781	2	LOC_Os03g09850.1	1803	LOC_Os03g09850.1	LOC_Os03g09850	0	Os03g0194300	auxin-responsive protein-related, putative, expressed
LOC_Os03g09880	39.425	20.015	-0.979	0.03416	Chr3	4913202	4913702	501	*	6.63	7.17	5.78	1.39	0.00523	0.0251	Promoter (<=1kb)	6	4913122	4914145	1024	1	LOC_Os03g09880.1	80	LOC_Os03g09870.1;LOC_Os03g09880.1	LOC_Os03g09870;LOC_Os03g09880	3564;0	Os03g0194600	AIR12, putative, expressed
LOC_Os03g10010	63.104	33.431	-0.921	0.01823	Chr3	5020906	5021406	501	*	6.46	7.25	4.6	2.65	8.47e-08	2.89e-06	Distal Intergenic	6	5014347	5014667	321	1	LOC_Os03g10010.1	6559				None	expressed protein
LOC_Os03g10010	63.104	33.431	-0.921	0.01823	Chr3	5014517	5015017	501	*	6.31	7.02	4.82	2.2	4.12e-05	0.000459	Exon (LOC_Os03g10010.1/LOC_Os03g10010, exon 1 of 1)	6	5014347	5014667	321	1	LOC_Os03g10010.1	170	LOC_Os03g10010.1	LOC_Os03g10010	0	None	expressed protein
LOC_Os03g10050	124.631	71.57	-0.807	0.001419	Chr3	5058535	5059035	501	*	5.16	6.05	2.43	3.62	0.000202	0.0018	Distal Intergenic	6	5063813	5065197	1385	2	LOC_Os03g10050.1	6162				Os03g0196600	serine acetyltransferase protein, putative, expressed
LOC_Os03g10260	53.802	29.031	-0.891	0.02168	Chr3	5225268	5225768	501	*	6.5	6.96	5.81	1.14	0.00236	0.0135	3' UTR	6	5225043	5226496	1454	2	LOC_Os03g10260.1	728	LOC_Os03g10260.1	LOC_Os03g10260	0	Os03g0199500	expressed protein
LOC_Os03g10640	180.612	112.002	-0.689	0.0005059	Chr3	5436818	5437318	501	*	5.96	6.58	4.88	1.7	0.0094	0.0388	Exon (LOC_Os03g10640.1/LOC_Os03g10640, exon 3 of 7)	6	5433906	5440327	6422	1	LOC_Os03g10640.1	2912	LOC_Os03g10640.1	LOC_Os03g10640	0	Os03g0203700	calcium-transporting ATPase, plasma membrane-type, putative, expressed
LOC_Os03g11120	2196.3	1434.74	-0.614	5.003e-19	Chr3	5718308	5718808	501	*	7.02	7.52	6.24	1.29	0.00223	0.0129	Promoter (2-3kb)	6	5721104	5728615	7512	1	LOC_Os03g11120.1	-2296	LOC_Os03g11120.1;LOC_Os03g11120.2	LOC_Os03g11120;LOC_Os03g11120	-2296;-2296	Os03g0209600	methionyl-tRNA synthetase, putative, expressed
LOC_Os03g11614	46.028	23.699	-0.959	0.03359	Chr3	6062307	6062807	501	*	6.62	7.11	5.86	1.26	0.000576	0.00436	Promoter (<=1kb)	6	6052750	6061369	8620	2	LOC_Os03g11614.1	-938	LOC_Os03g11614.1	LOC_Os03g11614	0	Os03g0215400	OsMADS1 - MADS-box family gene with MIKCc type-box, expressed	OsLG3b|OsMADS1|LHS1|AFO	meristem|palea|fertility|leaf|spikelet|branching|heading date|transcription factor|sterile|inflorescence|floral|flower|cytokinin|spikelet meristem|stamen|lemma|panicle|architecture|auxin|reproductive|floral meristem|growth|vegetative|seed|spikelet development|development|floral organ|flower development|organ identity|R protein|floral meristem determinacy|grain|domestication|grain length|yield|bre…	Ectopic expression of rice OsMADS1 reveals a role in specifying the lemma and palea, grass floral organs analogous to sepals|OsMADS1, a rice MADS-box factor, controls differentiation of specific cell types in the lemma and palea and is an early-acting regulator of inner floral organs|Auxin-responsive OsMGH3, a common downstream target of OsMADS1 and OsMADS6, controls rice floret fertility|Functio…
LOC_Os03g11614	46.028	23.699	-0.959	0.03359	Chr3	6052021	6052521	501	*	6.41	6.88	5.7	1.18	0.0112	0.044	Downstream (<1kb)	6	6052750	6061369	8620	2	LOC_Os03g11614.1	8848	LOC_Os03g11614.1	LOC_Os03g11614	0	Os03g0215400	OsMADS1 - MADS-box family gene with MIKCc type-box, expressed	OsLG3b|OsMADS1|LHS1|AFO	meristem|palea|fertility|leaf|spikelet|branching|heading date|transcription factor|sterile|inflorescence|floral|flower|cytokinin|spikelet meristem|stamen|lemma|panicle|architecture|auxin|reproductive|floral meristem|growth|vegetative|seed|spikelet development|development|floral organ|flower development|organ identity|R protein|floral meristem determinacy|grain|domestication|grain length|yield|bre…	Ectopic expression of rice OsMADS1 reveals a role in specifying the lemma and palea, grass floral organs analogous to sepals|OsMADS1, a rice MADS-box factor, controls differentiation of specific cell types in the lemma and palea and is an early-acting regulator of inner floral organs|Auxin-responsive OsMGH3, a common downstream target of OsMADS1 and OsMADS6, controls rice floret fertility|Functio…
LOC_Os03g11650	1118.6	370.247	-1.597	1.763e-53	Chr3	6079049	6079549	501	*	6.23	6.72	5.46	1.26	0.0037	0.0192	Promoter (<=1kb)	6	6079158	6084525	5368	1	LOC_Os03g11650.1	0	LOC_Os03g11650.1	LOC_Os03g11650	0	Os03g0215700	ATMAP70 protein, putative, expressed
LOC_Os03g12150	1471.02	807.464	-0.864	2.491e-26	Chr3	6378905	6379405	501	*	6.67	7.29	5.58	1.71	0.000974	0.00671	3' UTR	6	6377128	6380731	3604	1	LOC_Os03g12150.1	1777	LOC_Os03g12150.1;LOC_Os03g12160.1;LOC_Os03g12160.2	LOC_Os03g12150;LOC_Os03g12160;LOC_Os03g12160	0;0;0	Os03g0221700	serine/threonine-protein kinase receptor precursor, putative, expressed
LOC_Os03g12250	620.08	205.178	-1.594	1.234e-41	Chr3	6437508	6438008	501	*	6.17	6.84	4.91	1.93	0.000956	0.00661	Exon (LOC_Os03g12250.1/LOC_Os03g12250, exon 2 of 2)	6	6434790	6438530	3741	1	LOC_Os03g12250.1	2718	LOC_Os03g12250.1	LOC_Os03g12250	0	None	atypical receptor-like kinase MARK, putative, expressed
LOC_Os03g12250	620.08	205.178	-1.594	1.234e-41	Chr3	6431647	6432147	501	*	5.44	6.18	3.84	2.35	0.00067	0.00494	Promoter (2-3kb)	6	6434790	6438530	3741	1	LOC_Os03g12250.1	-2643	LOC_Os03g12238.1;LOC_Os03g12250.1	LOC_Os03g12238;LOC_Os03g12250	3370;0	None	atypical receptor-like kinase MARK, putative, expressed
LOC_Os03g12620	958.352	558.58	-0.777	1.515e-16	Chr3	6711824	6712324	501	*	6.55	7.14	5.52	1.62	0.00309	0.0167	Promoter (1-2kb)	6	6705818	6710465	4648	2	LOC_Os03g12620.2	-1359	LOC_Os03g12620.1;LOC_Os03g12620.2	LOC_Os03g12620;LOC_Os03g12620	0;0	Os03g0227400	glycosyl hydrolases family 17, putative, expressed
LOC_Os03g12620	958.352	558.58	-0.777	1.515e-16	Chr3	6706847	6707347	501	*	6.54	7.25	5.06	2.19	1.76e-08	9.63e-07	3' UTR	6	6705818	6710465	4648	2	LOC_Os03g12620.1	3118	LOC_Os03g12610.2;LOC_Os03g12610.1;LOC_Os03g12620.1;LOC_Os03g12620.2	LOC_Os03g12610;LOC_Os03g12610;LOC_Os03g12620;LOC_Os03g12620	0;0;0;0	Os03g0227400	glycosyl hydrolases family 17, putative, expressed
LOC_Os03g12680	98.353	33.195	-1.569	1.321e-07	Chr3	6767186	6767686	501	*	6.13	7.02	3.36	3.66	3.13e-05	0.000363	Promoter (<=1kb)	6	6762982	6767685	4704	2	LOC_Os03g12680.1	0	LOC_Os03g12680.1;LOC_Os03g12680.2	LOC_Os03g12680;LOC_Os03g12680	0;0	Os03g0227900	protein kinase, putative, expressed
LOC_Os03g12815	71.523	35.701	-1.005	0.001939	Chr3	6880264	6880764	501	*	4.95	5.75	3	2.74	0.00321	0.0172	Distal Intergenic	6	6876091	6876874	784	1	LOC_Os03g12815.1	4173				Os03g0229801	expressed protein
LOC_Os03g13000	589.139	280.956	-1.068	3.354e-20	Chr3	7022937	7023437	501	*	5.65	6.57	2.56	4	1.83e-05	0.000227	Promoter (<=1kb)	6	7022844	7026175	3332	1	LOC_Os03g13000.1	93	LOC_Os03g13000.2;LOC_Os03g13000.1	LOC_Os03g13000;LOC_Os03g13000	0;0	Os03g0232500	GTP-binding protein, putative, expressed
LOC_Os03g13000	589.139	280.956	-1.068	3.354e-20	Chr3	7026892	7027392	501	*	6.49	7.12	5.33	1.79	0.00158	0.00986	Downstream (1-2kb)	6	7022844	7026175	3332	1	LOC_Os03g13000.1	4048	LOC_Os03g13000.2;LOC_Os03g13000.1;LOC_Os03g13010.1	LOC_Os03g13000;LOC_Os03g13000;LOC_Os03g13010	0;0;4310	Os03g0232500	GTP-binding protein, putative, expressed
LOC_Os03g13030	235.341	148.638	-0.662	0.0001027	Chr3	7047155	7047655	501	*	5.01	5.99	-0.14	6.13	5.98e-07	1.26e-05	Promoter (1-2kb)	6	7043647	7046130	2484	2	LOC_Os03g13030.1	-1025	LOC_Os03g13030.2;LOC_Os03g13030.1;LOC_Os03g13040.1	LOC_Os03g13030;LOC_Os03g13030;LOC_Os03g13040	0;0;0	Os03g0232800	lecithin cholesterol acyltransferase, putative, expressed
LOC_Os03g13730	1770.32	1148.91	-0.624	8.669e-18	Chr3	7439682	7440182	501	*	5.11	6.08	0.49	5.58	1.86e-07	5.17e-06	Promoter (1-2kb)	6	7435678	7438082	2405	2	LOC_Os03g13730.2	-1600	LOC_Os03g13730.1;LOC_Os03g13730.2;LOC_Os03g13740.1	LOC_Os03g13730;LOC_Os03g13730;LOC_Os03g13740	0;-1600;0	Os03g0240500	translocase of chloroplast 34, putative, expressed
LOC_Os03g13820	524.486	229.199	-1.196	1.526e-22	Chr3	7483840	7484340	501	*	5.65	6.44	3.76	2.68	5.08e-05	0.00055	Exon (LOC_Os03g13820.1/LOC_Os03g13820, exon 9 of 11)	6	7482083	7487765	5683	2	LOC_Os03g13820.1	3425	LOC_Os03g13810.1;LOC_Os03g13810.3;LOC_Os03g13810.2;LOC_Os03g13820.1;LOC_Os03g13820.2	LOC_Os03g13810;LOC_Os03g13810;LOC_Os03g13810;LOC_Os03g13820;LOC_Os03g13820	3463;3463;3461;0;0	Os03g0241400	protein kinase family protein, putative, expressed
LOC_Os03g13820	524.486	229.199	-1.196	1.526e-22	Chr3	7487150	7487650	501	*	5.33	6.17	3.12	3.05	5.73e-06	8.28e-05	5' UTR	6	7482083	7487765	5683	2	LOC_Os03g13820.1	115	LOC_Os03g13820.1;LOC_Os03g13820.2	LOC_Os03g13820;LOC_Os03g13820	0;0	Os03g0241400	protein kinase family protein, putative, expressed
LOC_Os03g13820	524.486	229.199	-1.196	1.526e-22	Chr3	7489525	7490025	501	*	6.08	6.73	4.89	1.84	0.000194	0.00174	Promoter (1-2kb)	6	7482083	7487765	5683	2	LOC_Os03g13820.2	-1760	LOC_Os03g13820.1;LOC_Os03g13820.2	LOC_Os03g13820;LOC_Os03g13820	0;0	Os03g0241400	protein kinase family protein, putative, expressed
LOC_Os03g13820	524.486	229.199	-1.196	1.526e-22	Chr3	7491261	7491761	501	*	6.24	6.94	4.83	2.11	0.000646	0.00479	Distal Intergenic	6	7482083	7487765	5683	2	LOC_Os03g13820.2	-3496				Os03g0241400	protein kinase family protein, putative, expressed
LOC_Os03g13930	174.072	76.239	-1.189	1.143e-08	Chr3	7561046	7561546	501	*	5.63	6.58	1.97	4.61	4.81e-08	1.94e-06	Exon (LOC_Os03g13930.1/LOC_Os03g13930, exon 1 of 1)	6	7559115	7561986	2872	2	LOC_Os03g13930.1	440	LOC_Os03g13930.1;LOC_Os03g13940.1	LOC_Os03g13930;LOC_Os03g13940	0;-2317	Os03g0242900	OsSub28 - Putative Subtilisin homologue, expressed
LOC_Os03g13930	174.072	76.239	-1.189	1.143e-08	Chr3	7559417	7559917	501	*	5.22	6.2	-0.14	6.34	1.49e-07	4.39e-06	3' UTR	6	7559115	7561986	2872	2	LOC_Os03g13930.1	2069	LOC_Os03g13930.1	LOC_Os03g13930	0	Os03g0242900	OsSub28 - Putative Subtilisin homologue, expressed
LOC_Os03g14030	2066.79	1043.06	-0.987	4.175e-07	Chr3	7611597	7612097	501	*	6.12	6.91	4.26	2.64	1.08e-08	6.94e-07	3' UTR	6	7610990	7614083	3094	2	LOC_Os03g14030.1	1986	LOC_Os03g14030.1;LOC_Os03g14030.2	LOC_Os03g14030;LOC_Os03g14030	0;0	Os03g0243900	thaumatin, putative, expressed
LOC_Os03g14120	378.483	204.363	-0.89	2.33e-10	Chr3	7669716	7670216	501	*	5.38	6.37	-0.14	6.51	8.21e-08	2.83e-06	Promoter (1-2kb)	6	7671601	7675633	4033	1	LOC_Os03g14120.4	-1385	LOC_Os03g14110.1;LOC_Os03g14120.4;LOC_Os03g14120.2;LOC_Os03g14120.3;LOC_Os03g14120.1	LOC_Os03g14110;LOC_Os03g14120;LOC_Os03g14120;LOC_Os03g14120;LOC_Os03g14120	0;-1385;0;0;0	Os03g0245100	dihydrodipicolinate reductase, putative, expressed	SCB3
LOC_Os03g14250	1414.11	569.988	-1.311	3.982e-48	Chr3	7740874	7741374	501	*	5.33	6.31	-0.14	6.45	2e-07	5.49e-06	Promoter (<=1kb)	6	7740869	7749369	8501	1	LOC_Os03g14250.1	5	LOC_Os03g14250.1	LOC_Os03g14250	0	Os03g0246500	plant protein of unknown function DUF869 domain containing protein, expressed
LOC_Os03g14250	1414.11	569.988	-1.311	3.982e-48	Chr3	7732450	7732950	501	*	6.48	7.16	5.18	1.98	1.48e-05	0.000188	Distal Intergenic	6	7740869	7749369	8501	1	LOC_Os03g14250.1	-7919				Os03g0246500	plant protein of unknown function DUF869 domain containing protein, expressed
LOC_Os03g14400	1098.34	666.815	-0.719	2.786e-16	Chr3	7832030	7832530	501	*	5.83	6.51	4.5	2.01	9.32e-05	0.000928	3' UTR	6	7831876	7833791	1916	2	LOC_Os03g14400.1	1261	LOC_Os03g14390.1;LOC_Os03g14400.1;LOC_Os03g14410.1	LOC_Os03g14390;LOC_Os03g14400;LOC_Os03g14410	-2732;0;0	Os03g0248200	cytochrome P450, putative, expressed
LOC_Os03g14540	154.117	101.099	-0.605	0.01002	Chr3	7887284	7887784	501	*	5.98	6.7	4.5	2.2	0.000795	0.00569	Promoter (1-2kb)	6	7889242	7891358	2117	1	LOC_Os03g14540.1	-1458	LOC_Os03g14520.1;LOC_Os03g14530.1;LOC_Os03g14540.1	LOC_Os03g14520;LOC_Os03g14530;LOC_Os03g14540	6044;2469;0	Os03g0249500	UDP-glucuronate 4-epimerase, putative, expressed
LOC_Os03g14610	93.238	33.568	-1.476	4.643e-07	Chr3	7934487	7934987	501	*	6.75	7.32	5.8	1.52	0.00134	0.00864	Promoter (<=1kb)	6	7929009	7934005	4997	2	LOC_Os03g14610.1	-482	LOC_Os03g14610.1	LOC_Os03g14610	0	Os03g0250200	HVA22, putative, expressed
LOC_Os03g14630	23.405	8.529	-1.449	0.023	Chr3	7950184	7950684	501	*	6.26	7.05	4.34	2.71	0.0029	0.0159	Distal Intergenic	6	7946467	7947180	714	2	LOC_Os03g14630.1	-3004				Os03g0250400	LTPL106 - Protease inhibitor/seed storage/LTP family protein precursor, expressed
LOC_Os03g14642	591.563	110.297	-2.427	5.539e-65	Chr3	7961092	7961592	501	*	6.31	6.89	5.34	1.55	0.00104	0.00707	Promoter (1-2kb)	6	7958992	7959882	891	2	LOC_Os03g14642.1	-1210	LOC_Os03g14642.1	LOC_Os03g14642	0	None	LTPL107 - Protease inhibitor/seed storage/LTP family protein precursor, expressed
LOC_Os03g15190	21.458	7.841	-1.454	0.04784	Chr3	8310997	8311497	501	*	5.33	6.11	3.51	2.6	8.44e-05	0.000852	Promoter (<=1kb)	6	8307296	8311557	4262	2	LOC_Os03g15190.1	60	LOC_Os03g15190.1	LOC_Os03g15190	0	Os03g0257000	expressed protein
LOC_Os03g15330	33.327	11.46	-1.53	0.004293	Chr3	8385575	8386075	501	*	6.38	6.87	5.64	1.23	0.0125	0.0477	3' UTR	6	8386579	8387055	477	2	LOC_Os03g15330.1	980	LOC_Os03g15320.1;LOC_Os03g15330.1	LOC_Os03g15320;LOC_Os03g15330	0;980	None	expressed protein
LOC_Os03g15460	2620.72	1373.56	-0.933	1.438e-43	Chr3	8488667	8489167	501	*	6.76	7.43	5.47	1.96	1.29e-05	0.000167	Exon (LOC_Os03g15460.1/LOC_Os03g15460, exon 4 of 4)	6	8487523	8489384	1862	1	LOC_Os03g15460.1	1144	LOC_Os03g15460.1	LOC_Os03g15460	0	Os03g0261100	expressed protein	PLA2-II
LOC_Os03g15630	133.057	67.25	-0.98	0.0003569	Chr3	8624505	8625005	501	*	5.32	6.3	-0.14	6.44	6.33e-08	2.37e-06	3' UTR	6	8623309	8624568	1260	1	LOC_Os03g15630.1	1196	LOC_Os03g15630.1;LOC_Os03g15640.1	LOC_Os03g15630;LOC_Os03g15640	0;0	Os03g0262700	harpin-induced protein 1 domain containing protein, expressed
LOC_Os03g16060	278.492	136.312	-1.032	3.664e-10	Chr3	8852586	8853086	501	*	6.18	7.05	3.74	3.31	2.67e-07	6.79e-06	Intron (LOC_Os03g16060.1/LOC_Os03g16060, intron 2 of 2)	6	8851332	8854444	3113	1	LOC_Os03g16060.1	1254	LOC_Os03g16060.1;LOC_Os03g16070.2;LOC_Os03g16070.1;LOC_Os03g16070.3	LOC_Os03g16060;LOC_Os03g16070;LOC_Os03g16070;LOC_Os03g16070	0;5797;6257;6453	Os03g0267500	expressed protein
LOC_Os03g16060	278.492	136.312	-1.032	3.664e-10	Chr3	8849961	8850461	501	*	6.21	6.9	4.84	2.06	0.000448	0.00354	Promoter (<=1kb)	6	8851332	8854444	3113	1	LOC_Os03g16060.1	-871	LOC_Os03g16060.1	LOC_Os03g16060	0	Os03g0267500	expressed protein
LOC_Os03g16210	915.727	551.526	-0.731	1.738e-14	Chr3	8941846	8942346	501	*	5.26	6.25	-0.14	6.39	2.26e-07	6e-06	Promoter (<=1kb)	6	8939417	8941319	1903	2	LOC_Os03g16210.2	-527	LOC_Os03g16210.1;LOC_Os03g16210.2;LOC_Os03g16220.1;LOC_Os03g16220.6;LOC_Os03g16220.3;LOC_Os03g16220.4;LOC_Os03g16220.2;LOC_Os03g16220.5	LOC_Os03g16210;LOC_Os03g16210;LOC_Os03g16220;LOC_Os03g16220;LOC_Os03g16220;LOC_Os03g16220;LOC_Os03g16220;LOC_Os03g16220	0;0;0;0;0;0;0;0	Os03g0268900	tropinone reductase, putative, expressed
LOC_Os03g16700	1081.98	538.483	-1.006	2.806e-26	Chr3	9242505	9243005	501	*	5.79	6.38	4.79	1.59	0.00531	0.0253	Distal Intergenic	6	9247331	9252610	5280	1	LOC_Os03g16700.1	-4326				Os03g0274300	initiator-binding protein, putative, expressed
LOC_Os03g16700	1081.98	538.483	-1.006	2.806e-26	Chr3	9246630	9247130	501	*	3.75	4.7	-0.14	4.84	0.00029	0.00246	Promoter (<=1kb)	6	9247331	9252610	5280	1	LOC_Os03g16700.1	-201	LOC_Os03g16700.1;LOC_Os03g16700.2;LOC_Os03g16700.3;LOC_Os03g16700.4	LOC_Os03g16700;LOC_Os03g16700;LOC_Os03g16700;LOC_Os03g16700	-201;-695;-1004;-1152	Os03g0274300	initiator-binding protein, putative, expressed
LOC_Os03g16700	1081.98	538.483	-1.006	2.806e-26	Chr3	9237951	9238451	501	*	5.35	6.04	3.98	2.06	0.000711	0.00519	Distal Intergenic	6	9247331	9252610	5280	1	LOC_Os03g16700.1	-8880				Os03g0274300	initiator-binding protein, putative, expressed
LOC_Os03g17260	5.606	0	-5.065	0.007447	Chr3	9615824	9616324	501	*	6.03	6.64	4.94	1.7	0.000343	0.00283	Downstream (1-2kb)	6	9617509	9618969	1461	2	LOC_Os03g17260.1	2645	LOC_Os03g17250.1;LOC_Os03g17260.1	LOC_Os03g17250;LOC_Os03g17260	0;2645	Os03g0281201	expressed protein
LOC_Os03g17580	11481	5606.31	-1.034	2.928e-68	Chr3	9777750	9778250	501	*	5.19	6.06	2.68	3.38	0.00115	0.00766	Distal Intergenic	6	9781434	9782590	1157	2	LOC_Os03g17580.1	4340				Os03g0284400	ribosomal protein L10, putative, expressed
LOC_Os03g17850	102.896	19.876	-2.385	1.641e-11	Chr3	9948968	9949468	501	*	6.19	6.62	5.56	1.06	0.00851	0.0361	Exon (LOC_Os03g17850.1/LOC_Os03g17850, exon 2 of 6)	6	9946381	9952426	6046	1	LOC_Os03g17850.1	2587	LOC_Os03g17850.1	LOC_Os03g17850	0	Os03g0287800	glycosyltransferase family 43 protein, putative, expressed
LOC_Os03g17850	102.896	19.876	-2.385	1.641e-11	Chr3	9947819	9948319	501	*	6.28	6.84	5.37	1.47	0.000658	0.00486	Intron (LOC_Os03g17850.1/LOC_Os03g17850, intron 1 of 5)	6	9946381	9952426	6046	1	LOC_Os03g17850.1	1438	LOC_Os03g17850.1	LOC_Os03g17850	0	Os03g0287800	glycosyltransferase family 43 protein, putative, expressed
LOC_Os03g18140	766.908	463.606	-0.727	7.067e-13	Chr3	10150160	10150660	501	*	5.95	6.82	3.38	3.45	0.000414	0.00332	Exon (LOC_Os03g18140.1/LOC_Os03g18140, exon 2 of 5)	6	10147977	10153118	5142	1	LOC_Os03g18140.1	2183	LOC_Os03g18140.1	LOC_Os03g18140	0	Os03g0291800	expressed protein
LOC_Os03g18540	85.024	50.818	-0.737	0.01428	Chr3	10381340	10381840	501	*	6.11	6.7	5.09	1.61	0.00976	0.0398	Promoter (<=1kb)	6	10381358	10387602	6245	1	LOC_Os03g18540.1	0	LOC_Os03g18520.1;LOC_Os03g18530.1;LOC_Os03g18540.1;LOC_Os03g18540.2;LOC_Os03g18540.4	LOC_Os03g18520;LOC_Os03g18530;LOC_Os03g18540;LOC_Os03g18540;LOC_Os03g18540	0;0;0;0;0	Os03g0296700	expressed protein
LOC_Os03g18590	681.371	431.893	-0.657	1.413e-09	Chr3	10405883	10406383	501	*	5.96	6.76	4.04	2.71	3.7e-05	0.000418	Promoter (1-2kb)	6	10400748	10404295	3548	2	LOC_Os03g18590.1	-1588	LOC_Os03g18590.1	LOC_Os03g18590	-1588	Os03g0297400	malonyl CoA-acyl carrier protein transacylase, mitochondrial precursor, putative, expressed
LOC_Os03g18770	5253.29	3489.3	-0.59	5.886e-27	Chr3	10517565	10518065	501	*	5.99	6.85	3.57	3.28	0.000989	0.00679	5' UTR	6	10517108	10518361	1254	2	LOC_Os03g18770.1	296	LOC_Os03g18770.1;LOC_Os03g18779.1	LOC_Os03g18770;LOC_Os03g18779	0;-845	Os03g0299600	wound-induced protein WI12, putative, expressed
LOC_Os03g18850	69.92	37.545	-0.893	0.009454	Chr3	10561625	10562125	501	*	4.92	5.9	-0.14	6.04	1.05e-06	1.99e-05	Promoter (<=1kb)	6	10562231	10563279	1049	1	LOC_Os03g18850.1	-106	LOC_Os03g18840.1;LOC_Os03g18850.1;LOC_Os03g18860.1	LOC_Os03g18840;LOC_Os03g18850;LOC_Os03g18860	0;-106;0	Os03g0300400	pathogenesis-related Bet v I family protein, putative, expressed	JIOsPR10|OsPR10	seedling|root|jasmonic acid|palea|ethylene|jasmonic|blast|flower|defense|biotic stress|abiotic stress|jasmonate|shoot|development|oxidative stress|drought|salt|tolerance|oxidative|root development|stress|drought stress|drought stress	Molecular cloning and characterization of a novel Jasmonate inducible pathogenesis-related class 10 protein gene, JIOsPR10, from rice (Oryza sativa L.) seedling leaves|The rice pathogen-related protein 10 (JIOsPR10) is induced by abiotic and biotic stresses and exhibits ribonuclease activity|Overexpression of a Pathogenesis-Related Protein 10 Enhances Biotic and Abiotic Stress Tolerance in Rice.
LOC_Os03g18890	3352.74	1531.36	-1.13	1.469e-50	Chr3	10585197	10585697	501	*	5.48	6.34	3.05	3.29	1.09e-05	0.000144	3' UTR	6	10583980	10586026	2047	1	LOC_Os03g18890.1	1217	LOC_Os03g18890.1	LOC_Os03g18890	0	Os03g0300900	glycosyl transferase 8 domain containing protein, putative, expressed
LOC_Os03g19120	86.913	25.404	-1.768	4.211e-07	Chr3	10716407	10716907	501	*	6.56	7.02	5.87	1.15	0.00515	0.0248	Distal Intergenic	6	10707200	10713015	5816	2	LOC_Os03g19120.1	-3392				None	MYB family transcription factor, putative, expressed	OsP1
LOC_Os03g19120	86.913	25.404	-1.768	4.211e-07	Chr3	10708727	10709227	501	*	6.55	7.2	5.31	1.89	1.45e-07	4.29e-06	Exon (LOC_Os03g19120.1/LOC_Os03g19120, exon 3 of 4)	6	10707200	10713015	5816	2	LOC_Os03g19120.1	3788	LOC_Os03g19120.1	LOC_Os03g19120	0	None	MYB family transcription factor, putative, expressed	OsP1
LOC_Os03g19310	234.543	127.082	-0.879	5.298e-06	Chr3	10854476	10854976	501	*	6.98	7.54	6.05	1.49	6.38e-05	0.000668	Exon (LOC_Os03g19310.1/LOC_Os03g19310, exon 1 of 1)	6	10854011	10855742	1732	2	LOC_Os03g19310.1	766	LOC_Os03g19300.1;LOC_Os03g19310.1	LOC_Os03g19300;LOC_Os03g19310	3682;0	Os03g0305800	glycosyltransferase, putative, expressed
LOC_Os03g20100	10420.5	6647.98	-0.649	3.628e-15	Chr3	11346938	11347438	501	*	6.95	7.54	5.93	1.61	3.6e-05	0.000409	Distal Intergenic	6	11351431	11355773	4343	2	LOC_Os03g20100.1	8335				Os03g0315800	S1 RNA binding domain containing protein, expressed
LOC_Os03g20450	22.283	5.833	-1.94	0.004158	Chr3	11583388	11583888	501	*	6.05	6.78	4.49	2.3	1.84e-05	0.000228	Promoter (1-2kb)	6	11585300	11590366	5067	1	LOC_Os03g20450.1	-1412	LOC_Os03g20450.1	LOC_Os03g20450	-1412	Os03g0320800	expressed protein
LOC_Os03g20700	81781	52802	-0.631	2.032e-14	Chr3	11711368	11711868	501	*	6.48	6.97	5.73	1.24	0.00136	0.00874	Promoter (<=1kb)	6	11712169	11719550	7382	1	LOC_Os03g20700.2	-301	LOC_Os03g20690.1;LOC_Os03g20700.2;LOC_Os03g20700.1	LOC_Os03g20690;LOC_Os03g20700;LOC_Os03g20700	-1697;0;0	Os03g0323200	magnesium-chelatase, putative, expressed	OsCHLH	growth|chloroplast|seedling|mitochondria	Mitochondria provide the main source of cytosolic ATP for activation of outward-rectifying K+ channels in mesophyll protoplast of chlorophyll-deficient mutant rice (OsCHLH) seedlings|Characterization of a rice chlorophyll-deficient mutant using the T-DNA gene-trap system
LOC_Os03g21890	1416.24	732.546	-0.949	2.155e-28	Chr3	12520559	12521059	501	*	5.27	6	3.72	2.28	0.00359	0.0188	Distal Intergenic	6	12524476	12528883	4408	1	LOC_Os03g21890.1	-3417				Os03g0337500	potassium transporter, putative, expressed
LOC_Os03g22490	8072.31	4628.62	-0.802	2.217e-53	Chr3	12912607	12913107	501	*	4.9	5.88	-0.14	6.02	2.2e-06	3.68e-05	Distal Intergenic	6	12905893	12907767	1875	2	LOC_Os03g22490.1	-4840				Os03g0345700	heavy metal-associated domain containing protein, expressed
LOC_Os03g25330	434.008	114.274	-1.923	1.041e-35	Chr3	14470406	14470906	501	*	6.49	7.1	5.42	1.68	0.000366	0.00299	Exon (LOC_Os03g25330.1/LOC_Os03g25330, exon 2 of 2)	6	14469692	14471256	1565	1	LOC_Os03g25330.1	714	LOC_Os03g25330.1	LOC_Os03g25330	0	Os03g0368900	peroxidase precursor, putative, expressed
LOC_Os03g26910	74.056	14.894	-2.319	6.942e-10	Chr3	15383284	15383784	501	*	5.73	6.72	-0.14	6.86	2.85e-09	2.9e-07	Exon (LOC_Os03g26910.1/LOC_Os03g26910, exon 5 of 5)	6	15381803	15384274	2472	1	LOC_Os03g26910.1	1481	LOC_Os03g26910.1	LOC_Os03g26910	0	Os03g0386500	uncharacterized glycosyl hydrolase Rv2006/MT2062, putative, expressed
LOC_Os03g27770	1595.99	841.992	-0.925	4.898e-28	Chr3	15924007	15924507	501	*	5.48	6.03	4.58	1.45	0.012	0.0464	3' UTR	6	15923873	15927434	3562	2	LOC_Os03g27770.1	2927	LOC_Os03g27770.1	LOC_Os03g27770	0	Os03g0395000	heme oxygenase 2, putative, expressed	OsHO2|HO2|OsYLC2	tetrapyrrole biosynthesis|stroma	Young Leaf Chlorosis 2 encodes the stroma-localized heme oxygenase 2 which is required for normal tetrapyrrole biosynthesis in rice
LOC_Os03g28170	558.862	351.644	-0.672	6.879e-08	Chr3	16214545	16215045	501	*	7.31	7.77	6.65	1.12	0.00167	0.0103	3' UTR	6	16214381	16215458	1078	1	LOC_Os03g28170.1	164	LOC_Os03g28170.1;LOC_Os03g28175.1	LOC_Os03g28170;LOC_Os03g28175	0;-2716	Os03g0399900	expressed protein
LOC_Os03g29810	1090.55	677.872	-0.687	3.499e-14	Chr3	16994151	16994651	501	*	5.18	6.16	-0.14	6.3	1.79e-07	5.04e-06	Promoter (<=1kb)	6	16994268	16997742	3475	1	LOC_Os03g29810.1	0	LOC_Os03g29810.1	LOC_Os03g29810	0	Os03g0411500	OsClp6 - Putative Clp protease homologue, expressed	VYL|NAL9	leaf|growth|chloroplast	A rice virescent-yellow leaf mutant reveals new insights into the role and assembly of plastid caseinolytic protease in higher plants
LOC_Os03g30130	142.132	67.813	-1.07	1.861e-05	Chr3	17210034	17210534	501	*	5.26	6.19	1.77	4.42	2.24e-06	3.73e-05	Promoter (<=1kb)	6	17207296	17210555	3260	2	LOC_Os03g30130.1	21	LOC_Os03g30130.2;LOC_Os03g30130.1;LOC_Os03g30130.3;LOC_Os03g30150.1	LOC_Os03g30130;LOC_Os03g30130;LOC_Os03g30130;LOC_Os03g30150	0;0;0;0	Os03g0415200	phospholipase C, putative, expressed
LOC_Os03g30250	279.164	138.891	-1.006	4.914e-10	Chr3	17260742	17261242	501	*	6.04	6.66	4.89	1.77	0.00442	0.022	Exon (LOC_Os03g30250.1/LOC_Os03g30250, exon 2 of 3)	6	17260196	17262960	2765	1	LOC_Os03g30250.1	546	LOC_Os03g30240.1;LOC_Os03g30250.1;LOC_Os03g30260.1	LOC_Os03g30240;LOC_Os03g30250;LOC_Os03g30260	0;0;0	Os03g0416200	COBRA-like protein precursor, putative, expressed	BC1	cellulose|cell wall|culm|vascular bundle|architecture	BRITTLE CULM1, Which Encodes a COBRA-Like Protein, Affects the Mechanical Properties of Rice Plants|Rice Brittle culm 6 encodes a dominant-negative form of CesA protein that perturbs cellulose synthesis in secondary cell walls|Isolation of a novel cell wall architecture mutant of rice with defective Arabidopsis COBL4 ortholog BC1 required for regulated deposition of secondary cell wall components…
LOC_Os03g30250	279.164	138.891	-1.006	4.914e-10	Chr3	17259915	17260415	501	*	5.89	6.76	3.31	3.45	0.000435	0.00346	Promoter (<=1kb)	6	17260196	17262960	2765	1	LOC_Os03g30250.1	0	LOC_Os03g30240.1;LOC_Os03g30250.1;LOC_Os03g30260.1	LOC_Os03g30240;LOC_Os03g30250;LOC_Os03g30260	0;0;0	Os03g0416200	COBRA-like protein precursor, putative, expressed	BC1	cellulose|cell wall|culm|vascular bundle|architecture	BRITTLE CULM1, Which Encodes a COBRA-Like Protein, Affects the Mechanical Properties of Rice Plants|Rice Brittle culm 6 encodes a dominant-negative form of CesA protein that perturbs cellulose synthesis in secondary cell walls|Isolation of a novel cell wall architecture mutant of rice with defective Arabidopsis COBL4 ortholog BC1 required for regulated deposition of secondary cell wall components…
LOC_Os03g30830	102.256	40.1	-1.36	5.739e-06	Chr3	17571852	17572352	501	*	5.3	6.24	1.77	4.47	1.51e-05	0.000192	Promoter (<=1kb)	6	17569732	17572178	2447	2	LOC_Os03g30830.1	0	LOC_Os03g30830.1	LOC_Os03g30830	0	Os03g0421800	X8 domain containing protein, expressed
LOC_Os03g32470	741.19	409.331	-0.854	2.213e-16	Chr3	18569025	18569525	501	*	6.08	6.69	4.99	1.69	0.00011	0.00107	Promoter (1-2kb)	6	18570651	18572190	1540	1	LOC_Os03g32470.1	-1126	LOC_Os03g32470.1;LOC_Os03g32470.2;LOC_Os03g32480.1	LOC_Os03g32470;LOC_Os03g32470;LOC_Os03g32480	0;0;0	Os03g0439500	leucoanthocyanidin dioxygenase, putative, expressed
LOC_Os03g32526	839.897	411.353	-1.032	8.613e-21	Chr3	18608436	18608936	501	*	3.54	4.48	-0.14	4.62	0.000643	0.00477	Promoter (<=1kb)	6	18602727	18608700	5974	2	LOC_Os03g32526.1	0	LOC_Os03g32526.1;LOC_Os03g32540.1	LOC_Os03g32526;LOC_Os03g32540	0;-2257	Os03g0440200	tRNA-splicing endonuclease positive effector-related, putative, expressed
LOC_Os03g34040	14981.9	6581.84	-1.187	4.538e-116	Chr3	19416335	19416835	501	*	5.01	5.98	-0.14	6.13	6.46e-07	1.33e-05	Exon (LOC_Os03g34040.1/LOC_Os03g34040, exon 1 of 2)	6	19412908	19417098	4191	2	LOC_Os03g34040.1	263	LOC_Os03g34040.1;LOC_Os03g34040.2;LOC_Os03g34040.3	LOC_Os03g34040;LOC_Os03g34040;LOC_Os03g34040	0;0;0	Os03g0452300	ribosomal protein, putative, expressed
LOC_Os03g34040	14981.9	6581.84	-1.187	4.538e-116	Chr3	19417401	19417901	501	*	5.82	6.7	3.15	3.55	0.000295	0.00249	Promoter (<=1kb)	6	19412908	19417098	4191	2	LOC_Os03g34040.3	-303	LOC_Os03g34040.1;LOC_Os03g34040.2;LOC_Os03g34040.3	LOC_Os03g34040;LOC_Os03g34040;LOC_Os03g34040	0;0;0	Os03g0452300	ribosomal protein, putative, expressed
LOC_Os03g36160	22.717	7.347	-1.629	0.01373	Chr3	20062784	20063284	501	*	6.44	7.02	5.45	1.57	0.00101	0.00689	Distal Intergenic	6	20061677	20062555	879	1	LOC_Os03g36160.1	1107	LOC_Os03g36160.1;LOC_Os03g36170.1	LOC_Os03g36160;LOC_Os03g36170	0;0	Os03g0560400	DNAJ heat shock N-terminal domain-containing protein, putative, expressed
LOC_Os03g36160	22.717	7.347	-1.629	0.01373	Chr3	20060386	20060886	501	*	5.91	6.79	3.3	3.49	0.000288	0.00244	Promoter (<=1kb)	6	20061677	20062555	879	1	LOC_Os03g36160.1	-791	LOC_Os03g36150.1;LOC_Os03g36160.1	LOC_Os03g36150;LOC_Os03g36160	-2478;0	Os03g0560400	DNAJ heat shock N-terminal domain-containing protein, putative, expressed
LOC_Os03g36540	14790.8	8157.93	-0.858	2.027e-51	Chr3	20248685	20249185	501	*	5.48	6.47	-0.14	6.61	1.58e-08	8.95e-07	3' UTR	6	20247674	20250146	2473	2	LOC_Os03g36540.1	961	LOC_Os03g36540.1;LOC_Os03g36540.2	LOC_Os03g36540;LOC_Os03g36540	0;0	Os03g0563300	magnesium-chelatase subunit chlI, chloroplast precursor, putative, expressed	Chl9|OsChlI	seedling	Rice Chlorina-1 and Chlorina-9 encode ChlD and ChlI subunits of Mg-chelatase, a key enzyme for chlorophyll synthesis and chloroplast development
LOC_Os03g37570	82.043	42.48	-0.951	0.003186	Chr3	20839461	20839961	501	*	5.57	6.3	4.02	2.28	0.000182	0.00165	Promoter (<=1kb)	6	20837949	20839908	1960	2	LOC_Os03g37570.1	0	LOC_Os03g37570.1;LOC_Os03g37580.1;LOC_Os03g37580.2;LOC_Os03g37580.3;LOC_Os03g37580.4	LOC_Os03g37570;LOC_Os03g37580;LOC_Os03g37580;LOC_Os03g37580;LOC_Os03g37580	0;0;0;0;0	Os03g0572250	expressed protein
LOC_Os03g40390	61.352	34.854	-0.801	0.03746	Chr3	22443426	22443926	501	*	7.09	7.6	6.3	1.3	0.00561	0.0264	5' UTR	6	22443273	22445121	1849	1	LOC_Os03g40390.1	153	LOC_Os03g40380.1;LOC_Os03g40390.1;LOC_Os03g40400.1	LOC_Os03g40380;LOC_Os03g40390;LOC_Os03g40400	0;0;0	Os03g0601000	expressed protein
LOC_Os03g40670	433.075	197.648	-1.133	5.249e-16	Chr3	22617874	22618374	501	*	5.83	6.36	4.99	1.37	0.00399	0.0204	Intron (LOC_Os03g40670.1/LOC_Os03g40670, intron 5 of 7)	6	22615886	22619553	3668	1	LOC_Os03g40670.1	1988	LOC_Os03g40670.1	LOC_Os03g40670	0	Os03g0603600	glycerophosphoryl diester phosphodiesterase family protein, putative, expressed
LOC_Os03g40830	3988.47	2183.59	-0.868	4.254e-41	Chr3	22702279	22702779	501	*	5.97	6.52	5.08	1.44	0.00954	0.0392	Promoter (<=1kb)	6	22702919	22706164	3246	1	LOC_Os03g40830.1	-140	LOC_Os03g40830.1	LOC_Os03g40830	0	Os03g0605300	OsSub30 - Putative Subtilisin homologue, expressed
LOC_Os03g42830	31.148	11.296	-1.477	0.008628	Chr3	23871095	23871595	501	*	5.68	6.23	4.8	1.42	0.00767	0.0333	Exon (LOC_Os03g42830.1/LOC_Os03g42830, exon 5 of 8)	6	23870183	23876307	6125	2	LOC_Os03g42830.1	4712	LOC_Os03g42830.1	LOC_Os03g42830	0	Os03g0626700	MATE efflux family protein, putative, expressed
LOC_Os03g43650	621.007	231.93	-1.42	2.025e-31	Chr3	24402135	24402635	501	*	6.89	7.39	6.11	1.28	0.00312	0.0168	Exon (LOC_Os03g43650.1/LOC_Os03g43650, exon 1 of 1)	6	24400926	24402895	1970	2	LOC_Os03g43650.1	260	LOC_Os03g43650.1	LOC_Os03g43650	0	Os03g0637600	uncharacterized protein At4g06744 precursor, putative, expressed
LOC_Os03g45619	34.234	7.228	-2.24	5.635e-05	Chr3	25750141	25750641	501	*	6.03	6.75	4.56	2.19	1.21e-06	2.23e-05	Intron (LOC_Os03g45619.1/LOC_Os03g45619, intron 1 of 8)	6	25746001	25760794	14794	2	LOC_Os03g45619.1	10153	LOC_Os03g45619.1;LOC_Os03g45619.2	LOC_Os03g45619;LOC_Os03g45619	0;0	Os03g0658800	cytochrome P450, putative, expressed
LOC_Os03g45619	34.234	7.228	-2.24	5.635e-05	Chr3	25757546	25758046	501	*	5.26	6.22	1.27	4.95	7.83e-08	2.74e-06	Intron (LOC_Os03g45619.1/LOC_Os03g45619, intron 1 of 8)	6	25746001	25760794	14794	2	LOC_Os03g45619.1	2748	LOC_Os03g45619.1;LOC_Os03g45619.2	LOC_Os03g45619;LOC_Os03g45619	0;0	Os03g0658800	cytochrome P450, putative, expressed
LOC_Os03g45619	34.234	7.228	-2.24	5.635e-05	Chr3	25748779	25749279	501	*	5.42	6.36	1.74	4.61	2.81e-07	7.08e-06	Exon (LOC_Os03g45619.1/LOC_Os03g45619, exon 2 of 9)	6	25746001	25760794	14794	2	LOC_Os03g45619.1	11515	LOC_Os03g45619.1;LOC_Os03g45619.2	LOC_Os03g45619;LOC_Os03g45619	0;0	Os03g0658800	cytochrome P450, putative, expressed
LOC_Os03g45619	34.234	7.228	-2.24	5.635e-05	Chr3	25759120	25759620	501	*	6.92	7.54	5.84	1.7	0.00061	0.00457	Intron (LOC_Os03g45619.1/LOC_Os03g45619, intron 1 of 8)	6	25746001	25760794	14794	2	LOC_Os03g45619.1	1174	LOC_Os03g45619.1;LOC_Os03g45619.2;LOC_Os03g45650.1	LOC_Os03g45619;LOC_Os03g45619;LOC_Os03g45650	0;0;3873	Os03g0658800	cytochrome P450, putative, expressed
LOC_Os03g45710	3358.96	2215.36	-0.602	9.229e-13	Chr3	25800400	25800900	501	*	6.08	6.6	5.28	1.32	0.00449	0.0223	Promoter (<=1kb)	6	25800415	25801331	917	1	LOC_Os03g45710.1	0	LOC_Os03g45710.1;LOC_Os03g45720.1	LOC_Os03g45710;LOC_Os03g45720	0;0	Os03g0659200	2Fe-2S iron-sulfur cluster binding domain containing protein, expressed
LOC_Os03g45920	662.994	299.94	-1.144	4.245e-24	Chr3	25945318	25945818	501	*	6.06	6.85	4.16	2.69	0.000948	0.00656	Exon (LOC_Os03g45920.1/LOC_Os03g45920, exon 2 of 3)	6	25942717	25946741	4025	1	LOC_Os03g45920.1	2601	LOC_Os03g45920.1	LOC_Os03g45920	0	Os03g0661300	tubulin/FtsZ domain containing protein, putative, expressed	OsTUB8	seed|anther|vegetative|leaf|growth|pollen|vascular bundle|sheath|root	Functional analysis of OsTUB8, an anther-specific beta-tubulin in rice
LOC_Os03g45920	662.994	299.94	-1.144	4.245e-24	Chr3	25942689	25943189	501	*	6.15	6.81	4.87	1.94	0.00131	0.0085	Promoter (<=1kb)	6	25942717	25946741	4025	1	LOC_Os03g45920.1	0	LOC_Os03g45920.1	LOC_Os03g45920	0	Os03g0661300	tubulin/FtsZ domain containing protein, putative, expressed	OsTUB8	seed|anther|vegetative|leaf|growth|pollen|vascular bundle|sheath|root	Functional analysis of OsTUB8, an anther-specific beta-tubulin in rice
LOC_Os03g47650	244.758	141.929	-0.792	1.128e-05	Chr3	26988221	26988721	501	*	6.7	7.45	5.09	2.35	0.000488	0.0038	Promoter (<=1kb)	6	26988322	26995548	7227	1	LOC_Os03g47650.1	0	LOC_Os03g47640.1;LOC_Os03g47650.1	LOC_Os03g47640;LOC_Os03g47650	0;0	Os03g0680200	ankyrin, putative, expressed
LOC_Os03g48060	245.112	70.539	-1.794	2.858e-22	Chr3	27331006	27331506	501	*	5.95	6.52	5	1.52	0.00142	0.00903	Promoter (2-3kb)	6	27334203	27337910	3708	1	LOC_Os03g48060.1	-2697	LOC_Os03g48060.1	LOC_Os03g48060	0	Os03g0685300	class I glutamine amidotransferase, putative, expressed
LOC_Os03g48060	245.112	70.539	-1.794	2.858e-22	Chr3	27332123	27332623	501	*	5.82	6.65	3.62	3.04	1.77e-06	3.08e-05	Promoter (1-2kb)	6	27334203	27337910	3708	1	LOC_Os03g48060.1	-1580	LOC_Os03g48060.1	LOC_Os03g48060	0	Os03g0685300	class I glutamine amidotransferase, putative, expressed
LOC_Os03g48480	1335.94	823.379	-0.7	1.313e-15	Chr3	27646909	27647409	501	*	5.73	6.33	4.68	1.65	0.00988	0.0402	5' UTR	6	27644551	27647533	2983	2	LOC_Os03g48480.1	124	LOC_Os03g48480.1	LOC_Os03g48480	0	Os03g0691400	thioesterase family protein, putative, expressed
LOC_Os03g49160	30.678	8.206	-1.909	0.0007936	Chr3	28006089	28006589	501	*	5.16	6.13	0.49	5.64	2.09e-07	5.67e-06	Promoter (1-2kb)	6	28003436	28004332	897	2	LOC_Os03g49160.1	-1757	LOC_Os03g49160.1;LOC_Os03g49170.1;LOC_Os03g49170.3	LOC_Os03g49160;LOC_Os03g49170;LOC_Os03g49170	-1757;-2011;-2011	None	expressed protein
LOC_Os03g49480	716.853	454.417	-0.657	7.362e-10	Chr3	28161031	28161531	501	*	5.99	6.53	5.13	1.4	0.00481	0.0235	Promoter (<=1kb)	6	28160047	28161410	1364	2	LOC_Os03g49480.1	0	LOC_Os03g49464.1;LOC_Os03g49480.1;LOC_Os03g49485.1	LOC_Os03g49464;LOC_Os03g49480;LOC_Os03g49485	0;0;2934	Os03g0701500	elongation of fatty acids protein 2, putative, expressed
LOC_Os03g49830	717.557	471.464	-0.603	6.889e-08	Chr3	28390635	28391135	501	*	5.74	6.44	4.35	2.08	0.000292	0.00247	Exon (LOC_Os03g49830.1/LOC_Os03g49830, exon 2 of 2)	6	28390076	28392181	2106	1	LOC_Os03g49830.1	559	LOC_Os03g49830.1	LOC_Os03g49830	0	Os03g0705800	expressed protein
LOC_Os03g50130	538.189	247.562	-1.122	8.886e-20	Chr3	28593044	28593544	501	*	5.36	6.35	-0.14	6.49	4.26e-08	1.78e-06	3' UTR	6	28594359	28596340	1982	2	LOC_Os03g50130.2	2796	LOC_Os03g50120.1;LOC_Os03g50130.2;LOC_Os03g50130.1	LOC_Os03g50120;LOC_Os03g50130;LOC_Os03g50130	0;2796;2798	Os03g0709000	microsomal glutathione S-transferase 3, putative, expressed
LOC_Os03g50450	323.011	172.558	-0.902	2.547e-09	Chr3	28804382	28804882	501	*	5.97	6.69	4.47	2.22	0.0035	0.0184	3' UTR	6	28795423	28799255	3833	2	LOC_Os03g50450.1	-5127	LOC_Os03g50470.1;LOC_Os03g50470.2	LOC_Os03g50470;LOC_Os03g50470	0;0	Os03g0712400	inactive receptor kinase At2g26730 precursor, putative, expressed
LOC_Os03g50450	323.011	172.558	-0.902	2.547e-09	Chr3	28794217	28794717	501	*	6.28	6.89	5.23	1.66	8.25e-05	0.000836	Downstream (<1kb)	6	28795423	28799255	3833	2	LOC_Os03g50450.1	4538	LOC_Os03g50450.1	LOC_Os03g50450	0	Os03g0712400	inactive receptor kinase At2g26730 precursor, putative, expressed
LOC_Os03g50530	516.366	294.867	-0.808	5.847e-10	Chr3	28853723	28854223	501	*	5.9	6.73	3.75	2.97	1.47e-07	4.34e-06	Promoter (<=1kb)	6	28852103	28853655	1553	2	LOC_Os03g50530.1	-68	LOC_Os03g50520.1;LOC_Os03g50520.2;LOC_Os03g50530.1;LOC_Os03g50530.2;LOC_Os03g50540.1	LOC_Os03g50520;LOC_Os03g50520;LOC_Os03g50530;LOC_Os03g50530;LOC_Os03g50540	0;6895;0;0;0	Os03g0713200	expressed protein
LOC_Os03g50970	18.105	4.61	-1.977	0.0189	Chr3	29119621	29120121	501	*	5.01	5.95	1.54	4.41	4.62e-06	6.88e-05	Promoter (<=1kb)	6	29114636	29119892	5257	2	LOC_Os03g50970.1	0	LOC_Os03g50970.1	LOC_Os03g50970	0	Os03g0719000	retrotransposon protein, putative, Ty1-copia subclass, expressed
LOC_Os03g51150	494.398	161.292	-1.618	4.232e-34	Chr3	29275271	29275771	501	*	4.9	5.87	-0.14	6.01	1.27e-06	2.34e-05	Promoter (<=1kb)	6	29272320	29274639	2320	2	LOC_Os03g51150.1	-632	LOC_Os03g51140.1;LOC_Os03g51150.1;LOC_Os03g51160.1;LOC_Os03g51160.2	LOC_Os03g51140;LOC_Os03g51150;LOC_Os03g51160;LOC_Os03g51160	14741;-632;0;0	Os03g0721300	expressed protein
LOC_Os03g52010	543.58	278.636	-0.967	3.061e-11	Chr3	29847407	29847907	501	*	4.79	5.77	-0.14	5.91	2.34e-06	3.88e-05	Promoter (<=1kb)	6	29844796	29847027	2232	2	LOC_Os03g52010.1	-380	LOC_Os03g52010.1	LOC_Os03g52010	0	Os03g0730000	lecithin cholesterol acyltransferase, putative, expressed
LOC_Os03g52010	543.58	278.636	-0.967	3.061e-11	Chr3	29845339	29845839	501	*	6.19	7.04	3.87	3.17	7.69e-12	5.6e-09	Exon (LOC_Os03g52010.1/LOC_Os03g52010, exon 2 of 2)	6	29844796	29847027	2232	2	LOC_Os03g52010.1	1188	LOC_Os03g52000.1;LOC_Os03g52010.1	LOC_Os03g52000;LOC_Os03g52010	0;0	Os03g0730000	lecithin cholesterol acyltransferase, putative, expressed
LOC_Os03g52070	558.985	170.604	-1.709	2.107e-42	Chr3	29869097	29869597	501	*	6.87	7.47	5.83	1.64	0.000157	0.00146	Promoter (1-2kb)	6	29871085	29875766	4682	1	LOC_Os03g52070.1	-1488	LOC_Os03g52070.1;LOC_Os03g52070.3;LOC_Os03g52070.2	LOC_Os03g52070;LOC_Os03g52070;LOC_Os03g52070	0;0;0	Os03g0730500	OsSCP20 - Putative Serine Carboxypeptidase homologue, expressed
LOC_Os03g52640	1199.05	769.449	-0.64	5.522e-13	Chr3	30191100	30191600	501	*	4.9	5.88	-0.14	6.02	1.91e-06	3.28e-05	Promoter (<=1kb)	6	30188188	30191568	3381	2	LOC_Os03g52640.1	0	LOC_Os03g52640.1;LOC_Os03g52640.2;LOC_Os03g52640.3;LOC_Os03g52650.1	LOC_Os03g52640;LOC_Os03g52640;LOC_Os03g52640;LOC_Os03g52650	0;0;0;-1284	Os03g0736400	expressed protein
LOC_Os03g52880	261.473	170.46	-0.612	0.0003397	Chr3	30326916	30327416	501	*	6.18	6.89	4.72	2.17	4.26e-05	0.000472	Exon (LOC_Os03g52880.1/LOC_Os03g52880, exon 3 of 3)	6	30325554	30328584	3031	1	LOC_Os03g52880.1	1362	LOC_Os03g52880.1	LOC_Os03g52880	0	Os03g0738900	BTBN9 - Bric-a-Brac, Tramtrack, Broad Complex BTB domain with non-phototropic hypocotyl 3 NPH3 and coiled-coil domains, expressed
LOC_Os03g53930	122.74	80.336	-0.607	0.02688	Chr3	30920985	30921485	501	*	6.65	7.35	5.23	2.11	2.41e-05	0.000289	5' UTR	6	30920685	30921906	1222	1	LOC_Os03g53930.1	300	LOC_Os03g53920.1;LOC_Os03g53930.1	LOC_Os03g53920;LOC_Os03g53930	0;0	Os03g0750500	expressed protein
LOC_Os03g54040	2343.26	854.867	-1.457	2.072e-65	Chr3	30979776	30980276	501	*	6.31	6.81	5.53	1.29	0.00159	0.00993	Promoter (<=1kb)	6	30981039	30984626	3588	1	LOC_Os03g54040.1	-763	LOC_Os03g54030.1;LOC_Os03g54040.1	LOC_Os03g54030;LOC_Os03g54040	-1760;0	Os03g0751400	ribosomal protein L6, putative, expressed
LOC_Os03g54050	238.657	141.101	-0.762	9.276e-05	Chr3	30990714	30991214	501	*	5.68	6.51	3.53	2.97	1.01e-05	0.000134	Exon (LOC_Os03g54050.2/LOC_Os03g54050, exon 3 of 3)	6	30989898	30991939	2042	1	LOC_Os03g54050.1	816	LOC_Os03g54050.2;LOC_Os03g54050.1	LOC_Os03g54050;LOC_Os03g54050	0;0	Os03g0751600	anther-specific proline-rich protein APG precursor, putative, expressed
LOC_Os03g54050	238.657	141.101	-0.762	9.276e-05	Chr3	30986950	30987450	501	*	7.38	7.89	6.58	1.31	0.00252	0.0142	Promoter (2-3kb)	6	30989897	30991939	2043	1	LOC_Os03g54050.2	-2447	LOC_Os03g54040.1;LOC_Os03g54050.2;LOC_Os03g54050.1	LOC_Os03g54040;LOC_Os03g54050;LOC_Os03g54050	0;0;0	Os03g0751600	anther-specific proline-rich protein APG precursor, putative, expressed
LOC_Os03g54750	135.101	51.359	-1.391	4.222e-08	Chr3	31114318	31114818	501	*	6.44	6.88	5.81	1.06	0.0113	0.0444	Distal Intergenic	6	31124547	31126654	2108	2	LOC_Os03g54750.1	11836				Os03g0754500	COBRA-like 3 protein precursor, putative, expressed
LOC_Os03g54804	18.508	6.697	-1.469	0.03981	Chr3	31158293	31158793	501	*	5.64	6.46	3.51	2.95	0.00671	0.0302	Exon (LOC_Os03g54804.1/LOC_Os03g54804, exon 5 of 5)	6	31158439	31163848	5410	2	LOC_Os03g54804.1	5055	LOC_Os03g54804.1	LOC_Os03g54804	0	Os03g0755200	retrotransposon protein, putative, unclassified, expressed
LOC_Os03g55350	375.97	237.26	-0.663	3.409e-06	Chr3	31493137	31493637	501	*	6.87	7.35	6.15	1.2	0.000774	0.00557	Promoter (2-3kb)	6	31487940	31490885	2946	2	LOC_Os03g55350.1	-2252	LOC_Os03g55350.1;LOC_Os03g55360.1	LOC_Os03g55350;LOC_Os03g55360	-2252;-2284	Os03g0761500	OsSub31 - Putative Subtilisin homologue, expressed
LOC_Os03g55410	817.206	387.625	-1.077	7.293e-27	Chr3	31523833	31524333	501	*	4.85	5.75	1.95	3.81	2.15e-05	0.000261	Promoter (2-3kb)	6	31526726	31528307	1582	1	LOC_Os03g55410.1	-2393	LOC_Os03g55410.1	LOC_Os03g55410	0	Os03g0762300	peroxidase precursor, putative, expressed
LOC_Os03g55720	53243.4	31067.2	-0.777	5.693e-40	Chr3	31723310	31723810	501	*	5.77	6.76	-0.14	6.9	2.36e-09	2.61e-07	Promoter (1-2kb)	6	31725102	31725900	799	1	LOC_Os03g55720.2	-1292	LOC_Os03g55704.1;LOC_Os03g55720.2;LOC_Os03g55720.1;LOC_Os03g55730.1	LOC_Os03g55704;LOC_Os03g55720;LOC_Os03g55720;LOC_Os03g55730	0;0;0;8455	Os03g0765900	cytochrome b6f complex subunit, putative, expressed
LOC_Os03g56200	17.843	1.85	-3.284	0.0004233	Chr3	32020122	32020622	501	*	5.67	6.53	3.23	3.3	0.00129	0.00838	Exon (LOC_Os03g56200.1/LOC_Os03g56200, exon 2 of 2)	6	32019572	32021185	1614	2	LOC_Os03g56200.1	563	LOC_Os03g56190.1;LOC_Os03g56200.1	LOC_Os03g56190;LOC_Os03g56200	2478;0	Os03g0772900	expressed protein
LOC_Os03g56580	196.132	90.371	-1.119	8.084e-09	Chr3	32235628	32236128	501	*	5.07	6.05	-0.14	6.19	4.86e-07	1.06e-05	Exon (LOC_Os03g56580.1/LOC_Os03g56580, exon 3 of 3)	6	32234311	32236602	2292	1	LOC_Os03g56580.1	1317	LOC_Os03g56580.1;LOC_Os03g56590.1	LOC_Os03g56580;LOC_Os03g56590	0;4823	Os03g0777000	no apical meristem protein, putative, expressed
LOC_Os03g56670	173906	114762	-0.6	1.444e-19	Chr3	32273216	32273716	501	*	6.29	6.92	5.15	1.77	0.00667	0.03	3' UTR	6	32272930	32274174	1245	2	LOC_Os03g56670.1	458	LOC_Os03g56660.2;LOC_Os03g56660.3;LOC_Os03g56660.1;LOC_Os03g56670.1;LOC_Os03g56670.2	LOC_Os03g56660;LOC_Os03g56660;LOC_Os03g56660;LOC_Os03g56670;LOC_Os03g56670	0;0;7488;0;0	Os03g0778100	photosystem I reaction center subunit III, chloroplast precursor, putative, expressed
LOC_Os03g56670	173906	114762	-0.6	1.444e-19	Chr3	32274797	32275297	501	*	7.04	7.58	6.17	1.41	0.00111	0.00745	Promoter (<=1kb)	6	32272930	32274174	1245	2	LOC_Os03g56670.2	-623	LOC_Os03g56660.2;LOC_Os03g56660.3;LOC_Os03g56660.1;LOC_Os03g56670.1;LOC_Os03g56670.2	LOC_Os03g56660;LOC_Os03g56660;LOC_Os03g56660;LOC_Os03g56670;LOC_Os03g56670	0;0;9069;0;0	Os03g0778100	photosystem I reaction center subunit III, chloroplast precursor, putative, expressed
LOC_Os03g57260	108.234	69.684	-0.636	0.01491	Chr3	32655153	32655653	501	*	5.07	5.93	2.68	3.25	0.00247	0.014	Downstream (<1kb)	6	32656083	32660637	4555	2	LOC_Os03g57260.1	4984	LOC_Os03g57260.1;LOC_Os03g57260.2	LOC_Os03g57260;LOC_Os03g57260	0;0	Os03g0786500	GRF zinc finger family protein, expressed
LOC_Os03g57260	108.234	69.684	-0.636	0.01491	Chr3	32656273	32656773	501	*	4.06	5.02	-0.14	5.16	0.000112	0.00109	3' UTR	6	32656083	32660637	4555	2	LOC_Os03g57260.1	3864	LOC_Os03g57260.1;LOC_Os03g57260.2	LOC_Os03g57260;LOC_Os03g57260	0;0	Os03g0786500	GRF zinc finger family protein, expressed
LOC_Os03g57260	108.234	69.684	-0.636	0.01491	Chr3	32653948	32654448	501	*	5.97	6.51	5.09	1.42	0.00573	0.0268	Downstream (1-2kb)	6	32656083	32660637	4555	2	LOC_Os03g57260.1	6189	LOC_Os03g57260.1;LOC_Os03g57260.2	LOC_Os03g57260;LOC_Os03g57260	0;0	Os03g0786500	GRF zinc finger family protein, expressed
LOC_Os03g58110	364.353	210.168	-0.794	5.607e-09	Chr3	33084130	33084630	501	*	5.99	6.83	3.8	3.03	0.00346	0.0182	Exon (LOC_Os03g58110.1/LOC_Os03g58110, exon 2 of 2)	6	33083781	33085552	1772	2	LOC_Os03g58110.1	922	LOC_Os03g58110.1	LOC_Os03g58110	0	Os03g0795300	uncharacterized protein At4g06744 precursor, putative, expressed
LOC_Os03g58110	364.353	210.168	-0.794	5.607e-09	Chr3	33084871	33085371	501	*	6.3	6.81	5.51	1.3	0.0044	0.022	Exon (LOC_Os03g58110.1/LOC_Os03g58110, exon 1 of 2)	6	33083781	33085552	1772	2	LOC_Os03g58110.1	181	LOC_Os03g58110.1	LOC_Os03g58110	0	Os03g0795300	uncharacterized protein At4g06744 precursor, putative, expressed
LOC_Os03g59430	924.257	558.903	-0.726	2.484e-13	Chr3	33831598	33832098	501	*	5.39	6.37	-0.14	6.51	9.85e-08	3.22e-06	Exon (LOC_Os03g59430.2/LOC_Os03g59430, exon 6 of 11)	6	33829500	33834198	4699	1	LOC_Os03g59430.2	2098	LOC_Os03g59430.2;LOC_Os03g59440.1	LOC_Os03g59430;LOC_Os03g59440	0;3401	Os03g0808900	uncharacterized glycosyltransferase, putative, expressed
LOC_Os03g60340	325.531	50.376	-2.694	3.017e-43	Chr3	34314065	34314565	501	*	5.78	6.35	4.84	1.51	0.0054	0.0256	Exon (LOC_Os03g60340.1/LOC_Os03g60340, exon 2 of 4)	6	34311081	34314802	3722	2	LOC_Os03g60340.1	237	LOC_Os03g60340.1	LOC_Os03g60340	0	Os03g0817800	leaf senescence related protein, putative, expressed
LOC_Os03g60340	325.531	50.376	-2.694	3.017e-43	Chr3	34311388	34311888	501	*	5.33	6	4.06	1.94	0.00237	0.0135	3' UTR	6	34311081	34314802	3722	2	LOC_Os03g60340.1	2914	LOC_Os03g60340.1	LOC_Os03g60340	0	Os03g0817800	leaf senescence related protein, putative, expressed
LOC_Os03g60509	6210.65	2845.27	-1.127	5.543e-82	Chr3	34394566	34395066	501	*	5.85	6.7	3.51	3.19	0.00183	0.0111	3' UTR	6	34394493	34395664	1172	2	LOC_Os03g60509.1	598	LOC_Os03g60500.1;LOC_Os03g60509.1;LOC_Os03g60509.2;LOC_Os03g60520.1	LOC_Os03g60500;LOC_Os03g60509;LOC_Os03g60509;LOC_Os03g60520	0;0;0;0	Os03g0819600	expressed protein	gh1|OsCHI	panicle	A mutation in the rice chalcone isomerase gene causes the golden hull and internode 1 phenotype
LOC_Os03g60850	481.088	301.592	-0.672	8.836e-08	Chr3	34574493	34574993	501	*	5.92	6.91	-0.14	7.05	4.02e-10	8.1e-08	3' UTR	6	34574307	34576973	2667	2	LOC_Os03g60850.1	1980	LOC_Os03g60850.1	LOC_Os03g60850	0	Os03g0823500	peptide transporter PTR2, putative, expressed
LOC_Os03g60850	481.088	301.592	-0.672	8.836e-08	Chr3	34575606	34576106	501	*	5.24	6.14	2.43	3.7	0.000285	0.00242	Exon (LOC_Os03g60850.1/LOC_Os03g60850, exon 3 of 4)	6	34574307	34576973	2667	2	LOC_Os03g60850.1	867	LOC_Os03g60850.1	LOC_Os03g60850	0	Os03g0823500	peptide transporter PTR2, putative, expressed
LOC_Os03g62150	4.883	0.268	-3.948	0.04965	Chr3	35207600	35208100	501	*	6.82	7.23	6.23	1.01	0.00672	0.0302	Promoter (<=1kb)	6	35207543	35208331	789	1	LOC_Os03g62150.1	57	LOC_Os03g62140.1;LOC_Os03g62150.1;LOC_Os03g62160.1;LOC_Os03g62160.2	LOC_Os03g62140;LOC_Os03g62150;LOC_Os03g62160;LOC_Os03g62160	0;0;3251;3251	Os03g0837700	heat shock protein DnaJ, putative, expressed
LOC_Os03g62280	951.514	602.309	-0.661	2.79e-10	Chr3	35281020	35281520	501	*	5.21	5.96	3.55	2.42	0.00304	0.0165	Distal Intergenic	6	35284998	35287322	2325	1	LOC_Os03g62280.1	-3478				Os03g0839300	expressed protein
LOC_Os03g63970	222.975	104.88	-1.092	1.963e-08	Chr3	36147062	36147562	501	*	5.08	6.06	-0.14	6.2	4.62e-07	1.02e-05	Distal Intergenic	6	36150664	36152517	1854	1	LOC_Os03g63970.1	-3102				Os03g0856700	gibberellin 20 oxidase 1, putative, expressed	OsGA20ox1|GNP1|SDSFL1	ga |gibberellin|dwarf|seedling|panicle|grain|grain number|yield|cytokinin|inflorescence|GA|leaf|tiller|photosynthesis|stomatal|breeding|height|plant height|tiller number	A role of OsGA20ox1 , encoding an isoform of gibberellin 20-oxidase, for regulation of plant stature in rice|OsGA20ox1, a candidate gene for a major QTL controlling seedling vigor in rice|The rice GERMINATION DEFECTIVE 1, encoding a B3 domain transcriptional repressor, regulates seed germination and seedling development by integrating GA and carbohydrate metabolism|The QTL GNP1 Encodes GA20ox1, W…
LOC_Os03g64050	654.219	299.228	-1.128	3.198e-24	Chr3	36188108	36188608	501	*	5.59	6.3	4.16	2.14	0.00032	0.00266	Promoter (<=1kb)	6	36189259	36190656	1398	1	LOC_Os03g64050.1	-651	LOC_Os03g64030.1;LOC_Os03g64030.2;LOC_Os03g64050.1	LOC_Os03g64030;LOC_Os03g64030;LOC_Os03g64050	0;-2674;0	Os03g0857600	receptor protein kinase, putative, expressed
LOC_Os03g64280	460.914	255.074	-0.851	1.686e-11	Chr3	36318628	36319128	501	*	6.51	7.19	5.17	2.02	5.22e-05	0.000562	Exon (LOC_Os03g64280.1/LOC_Os03g64280, exon 1 of 1)	6	36318345	36319662	1318	1	LOC_Os03g64280.1	283	LOC_Os03g64280.1;LOC_Os03g64290.1	LOC_Os03g64280;LOC_Os03g64290	0;16335	Os03g0860600	1-aminocyclopropane-1-carboxylate oxidase homolog 1, putative, expressed
LOC_Os04g01540	4010.27	2481.66	-0.693	1.096e-20	Chr4	371947	372447	501	*	5.31	6.22	2.12	4.1	9.88e-08	3.23e-06	Promoter (<=1kb)	7	370770	372421	1652	2	LOC_Os04g01540.1	0	LOC_Os04g01540.1;LOC_Os04g01550.1	LOC_Os04g01540;LOC_Os04g01550	0;0	Os04g0105700	expressed protein
LOC_Os04g02620	378.696	195.404	-0.951	1.664e-10	Chr4	984569	985069	501	*	7.25	7.68	6.62	1.06	0.00659	0.0298	Promoter (<=1kb)	7	984543	987069	2527	1	LOC_Os04g02620.1	26	LOC_Os04g02620.1	LOC_Os04g02620	0	Os04g0116600	oxidoreductase, short chain dehydrogenase/reductase family, putative, expressed
LOC_Os04g02640	24.148	3.348	-2.843	0.0001465	Chr4	995737	996237	501	*	7.13	7.67	6.24	1.43	0.00362	0.0189	Promoter (1-2kb)	7	997304	999140	1837	1	LOC_Os04g02640.1	-1067	LOC_Os04g02640.1	LOC_Os04g02640	0	Os04g0116800	3-ketoacyl-CoA synthase 6, putative, expressed
LOC_Os04g02970	278.413	184.694	-0.594	0.0003748	Chr4	1202235	1202735	501	*	5.85	6.66	3.82	2.84	0.000783	0.00562	3' UTR	7	1201202	1202917	1716	1	LOC_Os04g02970.1	1033	LOC_Os04g02970.1	LOC_Os04g02970	0	Os04g0120100	subtilisin-like protease precursor, putative, expressed
LOC_Os04g05050	132.111	40.908	-1.689	3.373e-10	Chr4	2483365	2483865	501	*	5.84	6.44	4.77	1.68	0.00626	0.0287	5' UTR	7	2483098	2485914	2817	1	LOC_Os04g05050.2	267	LOC_Os04g05050.1;LOC_Os04g05050.2	LOC_Os04g05050;LOC_Os04g05050	0;0	Os04g0137201	pectate lyase precursor, putative, expressed
LOC_Os04g05050	132.111	40.908	-1.689	3.373e-10	Chr4	2481061	2481561	501	*	4.89	5.87	-0.14	6.01	1.39e-06	2.52e-05	Intron (LOC_Os04g05050.1/LOC_Os04g05050, intron 2 of 6)	7	2480533	2485914	5382	1	LOC_Os04g05050.1	528	LOC_Os04g05050.1;LOC_Os04g05050.2	LOC_Os04g05050;LOC_Os04g05050	0;0	Os04g0137201	pectate lyase precursor, putative, expressed
LOC_Os04g05050	132.111	40.908	-1.689	3.373e-10	Chr4	2486538	2487038	501	*	5.03	5.97	1.27	4.7	1.51e-06	2.7e-05	Distal Intergenic	7	2483098	2485914	2817	1	LOC_Os04g05050.2	3440	LOC_Os04g05050.1;LOC_Os04g05050.2	LOC_Os04g05050;LOC_Os04g05050	0;0	Os04g0137201	pectate lyase precursor, putative, expressed
LOC_Os04g08550	150.852	46.02	-1.715	3.199e-12	Chr4	4640099	4640599	501	*	5.82	6.77	1.77	5	1.84e-10	4.69e-08	Exon (LOC_Os04g08550.1/LOC_Os04g08550, exon 1 of 2)	7	4637978	4640929	2952	2	LOC_Os04g08550.1	330	LOC_Os04g08550.1	LOC_Os04g08550	0	Os04g0167800	oxidoreductase, aldo/keto reductase family protein, putative, expressed
LOC_Os04g08836	5.079	0.289	-3.948	0.04606	Chr4	4900199	4900699	501	*	5.45	6.25	3.45	2.81	0.0117	0.0454	Distal Intergenic	7	4897173	4897791	619	1	LOC_Os04g08836.1	3026	LOC_Os04g08836.1	LOC_Os04g08836	3026	None	cytochrome P450 79A1, putative, expressed
LOC_Os04g10530	129.418	45.52	-1.513	1.719e-08	Chr4	5718220	5718720	501	*	6.08	6.74	4.79	1.96	0.000524	0.00402	Distal Intergenic	7	5727999	5731952	3954	1	LOC_Os04g10530.1	-9279				Os04g0184100	amidase, putative, expressed
LOC_Os04g10530	129.418	45.52	-1.513	1.719e-08	Chr4	5728531	5729031	501	*	6.19	6.86	4.89	1.97	2.78e-05	0.000327	Exon (LOC_Os04g10530.1/LOC_Os04g10530, exon 1 of 5)	7	5727999	5731952	3954	1	LOC_Os04g10530.1	532	LOC_Os04g10530.1	LOC_Os04g10530	0	Os04g0184100	amidase, putative, expressed
LOC_Os04g10530	129.418	45.52	-1.513	1.719e-08	Chr4	5727313	5727813	501	*	5.88	6.75	3.38	3.37	0.000663	0.0049	Promoter (<=1kb)	7	5727999	5731952	3954	1	LOC_Os04g10530.1	-186	LOC_Os04g10530.1	LOC_Os04g10530	0	Os04g0184100	amidase, putative, expressed
LOC_Os04g11980	20.801	5.788	-1.842	0.007132	Chr4	6567912	6568412	501	*	5.31	6.25	1.54	4.71	1.58e-07	4.58e-06	Promoter (<=1kb)	7	6567884	6568651	768	1	LOC_Os04g11980.2	28	LOC_Os04g11970.1;LOC_Os04g11980.1;LOC_Os04g11980.2	LOC_Os04g11970;LOC_Os04g11980;LOC_Os04g11980	0;0;0	Os04g0196300	expressed protein
LOC_Os04g12010	145.412	89.816	-0.693	0.002355	Chr4	6593424	6593924	501	*	6.72	7.31	5.72	1.59	0.00206	0.0121	Exon (LOC_Os04g12010.1/LOC_Os04g12010, exon 6 of 6)	7	6593189	6595756	2568	2	LOC_Os04g12010.1	1832	LOC_Os04g12000.1;LOC_Os04g12010.1;LOC_Os04g12010.2	LOC_Os04g12000;LOC_Os04g12010;LOC_Os04g12010	-2129;0;0	Os04g0196600	glycosyltransferase, putative, expressed
LOC_Os04g13290	9.091	1.487	-2.579	0.04314	Chr4	7376709	7377209	501	*	4.56	5.46	1.56	3.9	0.000141	0.00133	Distal Intergenic	7	7371303	7373862	2560	1	LOC_Os04g13290.1	5406	LOC_Os04g13290.1	LOC_Os04g13290	5406	None	retrotransposon protein, putative, unclassified, expressed
LOC_Os04g14810	68.912	25.03	-1.456	3.016e-05	Chr4	8318507	8319007	501	*	7.01	7.45	6.37	1.08	0.0051	0.0246	Downstream (1-2kb)	7	8320563	8321450	888	2	LOC_Os04g14810.1	2443	LOC_Os04g14810.1	LOC_Os04g14810	0	Os04g0225100	3-5 exonuclease domain-containing protein, putative, expressed
LOC_Os04g15690	972.611	468.092	-1.056	1.591e-29	Chr4	8527443	8527943	501	*	5.27	6.2	1.97	4.23	4.79e-06	7.09e-05	Promoter (<=1kb)	7	8528512	8533183	4672	1	LOC_Os04g15690.1	-569	LOC_Os04g15690.1	LOC_Os04g15690	0	Os04g0227500	DSBA-like thioredoxin domain containing protein, expressed
LOC_Os04g16970	53.222	18.688	-1.504	0.0002041	Chr4	9292149	9292649	501	*	5.92	6.41	5.16	1.25	0.00968	0.0396	Promoter (<=1kb)	7	9291213	9291999	787	2	LOC_Os04g16970.1	-150	LOC_Os04g16970.1;LOC_Os04g16980.1	LOC_Os04g16970;LOC_Os04g16980	0;0	Os04g0243700	zinc finger, C3HC4 type domain containing protein, expressed	OsCTR1	seed germination|stomatal|phytohormone|stomata|defense|chloroplast|drought|seed|growth|drought tolerance|seedling	The rice RING E3 ligase, OsCTR1, inhibits trafficking to the chloroplasts of OsCP12 and OsRP1, and its overexpression confers drought tolerance in Arabidopsis
LOC_Os04g24220	68.986	31.913	-1.106	0.00162	Chr4	13860418	13860918	501	*	6.51	7.26	4.88	2.38	0.00316	0.017	Promoter (2-3kb)	7	13863222	13868260	5039	1	LOC_Os04g24220.3	-2304	LOC_Os04g24210.1;LOC_Os04g24220.3;LOC_Os04g24220.2;LOC_Os04g24220.1	LOC_Os04g24210;LOC_Os04g24220;LOC_Os04g24220;LOC_Os04g24220	5716;-2304;-2326;-2331	Os04g0307500	OsWAK32 - OsWAK receptor-like protein kinase, expressed
LOC_Os04g24750	40.362	14.03	-1.52	0.001359	Chr4	14213325	14213825	501	*	5.89	6.77	3.23	3.54	0.000269	0.0023	Distal Intergenic	7	14209573	14210768	1196	1	LOC_Os04g24750.1	3752	LOC_Os04g24750.1	LOC_Os04g24750	0	Os04g0312500	aspartic proteinase nepenthesin precursor, putative, expressed
LOC_Os04g25370	13.789	1.815	-2.927	0.006634	Chr4	14684377	14684877	501	*	4.51	5.36	2.19	3.17	0.00318	0.0171	Distal Intergenic	7	14680107	14681661	1555	1	LOC_Os04g25370.1	4270	LOC_Os04g25370.1	LOC_Os04g25370	0	Os04g0319700	cytokinin-O-glucosyltransferase 2, putative, expressed
LOC_Os04g26870	149.172	37.633	-1.995	3.399e-14	Chr4	15881299	15881799	501	*	4.66	5.38	3.17	2.21	0.0104	0.0416	Distal Intergenic	7	15888815	15893913	5099	1	LOC_Os04g26870.1	-7016	LOC_Os04g26850.2	LOC_Os04g26850	0	Os04g0337500	oxidoreductase, aldo/keto reductase family protein, putative, expressed
LOC_Os04g28300	103.166	65.376	-0.653	0.01578	Chr4	16752936	16753436	501	*	5.85	6.56	4.36	2.21	0.00145	0.00921	Promoter (<=1kb)	7	16753556	16757223	3668	1	LOC_Os04g28300.1	-120	LOC_Os04g28300.1	LOC_Os04g28300	-120	Os04g0351300	Rf1, mitochondrial precursor, putative, expressed
LOC_Os04g30010	19.488	0.596	-4.996	0.0001413	Chr4	17906678	17907178	501	*	5.67	6.62	1.77	4.85	2.66e-09	2.78e-07	Exon (LOC_Os04g30010.1/LOC_Os04g30010, exon 3 of 3)	7	17906097	17909802	3706	2	LOC_Os04g30010.1	2624	LOC_Os04g30000.1;LOC_Os04g30010.1	LOC_Os04g30000;LOC_Os04g30010	2754;0	Os04g0368800	OsWAK45 - OsWAK receptor-like protein kinase, expressed
LOC_Os04g30010	19.488	0.596	-4.996	0.0001413	Chr4	17909295	17909795	501	*	6.99	7.41	6.39	1.03	0.00331	0.0176	Promoter (<=1kb)	7	17906097	17909802	3706	2	LOC_Os04g30010.1	7	LOC_Os04g30010.1;LOC_Os04g30020.1	LOC_Os04g30010;LOC_Os04g30020	0;0	Os04g0368800	OsWAK45 - OsWAK receptor-like protein kinase, expressed
LOC_Os04g30420	201.246	97.939	-1.038	4.222e-08	Chr4	18168694	18169194	501	*	5.63	6.51	2.98	3.53	0.000338	0.00279	Promoter (<=1kb)	7	18168723	18172037	3315	1	LOC_Os04g30420.1	0	LOC_Os04g30420.1;LOC_Os04g30430.1	LOC_Os04g30420;LOC_Os04g30430	0;0	Os04g0372700	dehydrogenase, putative, expressed
LOC_Os04g30490	1231.64	3.926	-8.29	1.328e-88	Chr4	18211319	18211819	501	*	5.84	6.77	2.53	4.23	1.69e-07	4.82e-06	Promoter (1-2kb)	7	18212826	18216756	3931	1	LOC_Os04g30490.1	-1007	LOC_Os04g30490.1	LOC_Os04g30490	0	Os04g0373400	MATE efflux family protein, putative, expressed
LOC_Os04g30920	11.346	1.504	-2.921	0.01465	Chr4	18482532	18483032	501	*	6.15	6.69	5.28	1.41	0.000932	0.00647	Distal Intergenic	7	18476400	18477254	855	2	LOC_Os04g30920.1	-5278				None	expressed protein
LOC_Os04g32090	100.637	60.974	-0.727	0.01349	Chr4	19245120	19245620	501	*	5.37	6.36	-0.14	6.5	6.59e-08	2.44e-06	Exon (LOC_Os04g32090.1/LOC_Os04g32090, exon 1 of 9)	7	19240380	19245971	5592	2	LOC_Os04g32090.1	351	LOC_Os04g32090.1	LOC_Os04g32090	0	Os04g0391000	expressed protein
LOC_Os04g32850	31707.9	20062.5	-0.66	9.637e-22	Chr4	19832184	19832684	501	*	6.35	6.97	5.24	1.73	4.4e-06	6.6e-05	Downstream (2-3kb)	7	19835131	19836301	1171	2	LOC_Os04g32850.3	3617	LOC_Os04g32850.1;LOC_Os04g32850.2;LOC_Os04g32850.3	LOC_Os04g32850;LOC_Os04g32850;LOC_Os04g32850	0;0;0	Os04g0401000	basic proline-rich protein, putative, expressed	Pi21	defense response|blast|blast resistance|resistant|defense|resistance|magnaporthe oryzae	Loss of function of a proline-containing protein confers durable disease resistance in rice|QTL analysis and mapping of pi21 , a recessive gene for field resistance to rice blast in Japanese upland rice|Transcriptome Analysis Highlights Defense and Signaling Pathways Mediated by Rice pi21 Gene with Partial Resistance to Magnaporthe oryzae.
LOC_Os04g32850	31707.9	20062.5	-0.66	9.637e-22	Chr4	19835588	19836088	501	*	6.92	7.4	6.2	1.2	0.00062	0.00464	Exon (LOC_Os04g32850.3/LOC_Os04g32850, exon 1 of 1)	7	19835131	19836301	1171	2	LOC_Os04g32850.3	213	LOC_Os04g32850.1;LOC_Os04g32850.2;LOC_Os04g32850.3	LOC_Os04g32850;LOC_Os04g32850;LOC_Os04g32850	0;0;0	Os04g0401000	basic proline-rich protein, putative, expressed	Pi21	defense response|blast|blast resistance|resistant|defense|resistance|magnaporthe oryzae	Loss of function of a proline-containing protein confers durable disease resistance in rice|QTL analysis and mapping of pi21 , a recessive gene for field resistance to rice blast in Japanese upland rice|Transcriptome Analysis Highlights Defense and Signaling Pathways Mediated by Rice pi21 Gene with Partial Resistance to Magnaporthe oryzae.
LOC_Os04g33060	1833.65	1121.31	-0.71	9.48e-21	Chr4	20015784	20016284	501	*	5.41	6.4	-0.14	6.54	2.99e-08	1.39e-06	Promoter (<=1kb)	7	20015750	20019634	3885	1	LOC_Os04g33060.1	34	LOC_Os04g33050.1;LOC_Os04g33060.1	LOC_Os04g33050;LOC_Os04g33060	5871;0	Os04g0403500	NAD dependent epimerase/dehydratase family protein, putative, expressed
LOC_Os04g33370	76.503	27.61	-1.468	1.598e-05	Chr4	20206101	20206601	501	*	5.83	6.57	4.26	2.31	5.63e-06	8.16e-05	Distal Intergenic	7	20211340	20213320	1981	1	LOC_Os04g33370.1	-4739				Os04g0407900	cytochrome P450, putative, expressed
LOC_Os04g33370	76.503	27.61	-1.468	1.598e-05	Chr4	20211198	20211698	501	*	7.1	7.57	6.41	1.16	0.00104	0.00707	Promoter (<=1kb)	7	20211340	20213320	1981	1	LOC_Os04g33370.1	0	LOC_Os04g33370.1	LOC_Os04g33370	0	Os04g0407900	cytochrome P450, putative, expressed
LOC_Os04g33390	528.722	231.09	-1.191	1.944e-20	Chr4	20167259	20167759	501	*	5.13	5.98	2.83	3.14	0.000131	0.00125	Promoter (1-2kb)	7	20169585	20171246	1662	1	LOC_Os04g33390.1	-1826	LOC_Os04g33390.1	LOC_Os04g33390	0	Os04g0406600	prephenate dehydratase domain containing protein, expressed
LOC_Os04g33450	420.289	145.641	-1.53	7.648e-28	Chr4	20223474	20223974	501	*	6.12	6.62	5.33	1.29	0.00943	0.0389	Promoter (<=1kb)	7	20221230	20223082	1853	2	LOC_Os04g33450.2	-392	LOC_Os04g33450.2;LOC_Os04g33450.3;LOC_Os04g33450.1;LOC_Os04g33440.2;LOC_Os04g33430.1	LOC_Os04g33450;LOC_Os04g33450;LOC_Os04g33450;LOC_Os04g33440;LOC_Os04g33430	0;0;0;2441;3275	Os04g0408600	expressed protein
LOC_Os04g33450	420.289	145.641	-1.53	7.648e-28	Chr4	20222901	20223401	501	*	5.68	6.62	1.97	4.66	1.34e-08	8.05e-07	Promoter (<=1kb)	7	20221230	20223074	1845	2	LOC_Os04g33450.3	0	LOC_Os04g33450.2;LOC_Os04g33450.3;LOC_Os04g33450.1;LOC_Os04g33440.2	LOC_Os04g33450;LOC_Os04g33450;LOC_Os04g33450;LOC_Os04g33440	0;0;0;3014	Os04g0408600	expressed protein
LOC_Os04g33620	4.447	0	-4.692	0.0275	Chr4	20361545	20362045	501	*	6.11	6.6	5.36	1.24	0.00284	0.0156	Downstream (2-3kb)	7	20364171	20364754	584	2	LOC_Os04g33620.1	2709	LOC_Os04g33610.1;LOC_Os04g33620.1	LOC_Os04g33610;LOC_Os04g33620	0;2709	Os04g0412150	expressed protein
LOC_Os04g33640	143.657	65.438	-1.129	6.087e-06	Chr4	20375951	20376451	501	*	6.44	7.04	5.37	1.68	0.000222	0.00196	Exon (LOC_Os04g33640.1/LOC_Os04g33640, exon 2 of 3)	7	20373145	20377957	4813	1	LOC_Os04g33640.2	2806	LOC_Os04g33640.1;LOC_Os04g33640.2	LOC_Os04g33640;LOC_Os04g33640	0;0	Os04g0412300	glycosyl hydrolases family 17, putative, expressed
LOC_Os04g33660	745.697	478.621	-0.643	8.943e-10	Chr4	20387196	20387696	501	*	6.49	6.97	5.76	1.21	0.00292	0.016	Promoter (<=1kb)	7	20387715	20390008	2294	1	LOC_Os04g33660.2	-19	LOC_Os04g33660.2;LOC_Os04g33660.1	LOC_Os04g33660;LOC_Os04g33660	0;0	Os04g0412500	bifunctional monodehydroascorbate reductase and carbonic anhydrasenectarin-3 precursor, putative, expressed
LOC_Os04g33660	745.697	478.621	-0.643	8.943e-10	Chr4	20389335	20389835	501	*	6.18	6.99	4.19	2.8	2.08e-06	3.51e-05	3' UTR	7	20388100	20390008	1909	1	LOC_Os04g33660.1	1235	LOC_Os04g33660.2;LOC_Os04g33660.1;LOC_Os04g33670.1	LOC_Os04g33660;LOC_Os04g33660;LOC_Os04g33670	0;0;-2151	Os04g0412500	bifunctional monodehydroascorbate reductase and carbonic anhydrasenectarin-3 precursor, putative, expressed
LOC_Os04g33770	23.978	2.425	-3.301	3.031e-05	Chr4	20451629	20452129	501	*	5.53	6.12	4.53	1.59	0.00692	0.0309	Distal Intergenic	7	20446867	20451155	4289	1	LOC_Os04g33770.1	4762	LOC_Os04g33770.1	LOC_Os04g33770	0	Os04g0414000	nucleoside-diphosphate-sugar epimerase, putative, expressed
LOC_Os04g33770	23.978	2.425	-3.301	3.031e-05	Chr4	20445753	20446253	501	*	5.07	6.05	-0.14	6.19	3.85e-07	8.89e-06	Promoter (<=1kb)	7	20446867	20451155	4289	1	LOC_Os04g33770.1	-614	LOC_Os04g33760.1;LOC_Os04g33770.1	LOC_Os04g33760;LOC_Os04g33770	2463;0	Os04g0414000	nucleoside-diphosphate-sugar epimerase, putative, expressed
LOC_Os04g33770	23.978	2.425	-3.301	3.031e-05	Chr4	20446746	20447246	501	*	5.34	6.18	3.02	3.16	6.98e-05	0.000721	Promoter (<=1kb)	7	20446867	20451155	4289	1	LOC_Os04g33770.1	0	LOC_Os04g33760.1;LOC_Os04g33770.1	LOC_Os04g33760;LOC_Os04g33770	3456;0	Os04g0414000	nucleoside-diphosphate-sugar epimerase, putative, expressed
LOC_Os04g34420	25.524	7.943	-1.671	0.009916	Chr4	20850576	20851076	501	*	5.56	6.55	-0.14	6.69	5.21e-08	2.05e-06	Downstream (1-2kb)	7	20843256	20845682	2427	1	LOC_Os04g34420.1	7320	LOC_Os04g34440.1	LOC_Os04g34440	0	None	serine/threonine-protein kinase receptor precursor, putative, expressed
LOC_Os04g34976	621.538	267.13	-1.216	1.635e-26	Chr4	21257288	21257788	501	*	4.64	5.62	-0.14	5.76	8.3e-06	0.000114	Promoter (<=1kb)	7	21258335	21262830	4496	1	LOC_Os04g34976.2	-547	LOC_Os04g34976.2	LOC_Os04g34976	-547	Os04g0429100	SET domain containing protein, expressed
LOC_Os04g35030	73.116	0.31	-7.806	1.784e-09	Chr4	21290664	21291164	501	*	6.88	7.46	5.88	1.59	1.61e-05	0.000203	Exon (LOC_Os04g35030.1/LOC_Os04g35030, exon 2 of 8)	7	21288130	21293643	5514	2	LOC_Os04g35030.1	2479	LOC_Os04g35030.1	LOC_Os04g35030	0	Os04g0429600	CSLH3 - cellulose synthase-like family H, expressed
LOC_Os04g35050	6.608	0	-5.305	0.003237	Chr4	21300056	21300556	501	*	6.02	6.79	4.26	2.53	7.39e-06	0.000103	Exon (LOC_Os04g35050.1/LOC_Os04g35050, exon 3 of 3)	7	21299404	21300533	1130	1	LOC_Os04g35050.1	652	LOC_Os04g35050.1	LOC_Os04g35050	0	None	retrotransposon protein, putative, unclassified
LOC_Os04g35080	222.693	136.14	-0.709	5.151e-05	Chr4	21323850	21324350	501	*	5.68	6.57	2.89	3.68	0.000165	0.00152	Exon (LOC_Os04g35080.1/LOC_Os04g35080, exon 1 of 7)	7	21323046	21326956	3911	1	LOC_Os04g35080.1	804	LOC_Os04g35080.1	LOC_Os04g35080	0	Os04g0430000	protein kinase domain containing protein, expressed
LOC_Os04g35560	256.09	97.229	-1.394	4.262e-15	Chr4	21663787	21664287	501	*	5.88	6.87	0.49	6.37	4.86e-11	2.01e-08	Promoter (<=1kb)	7	21662078	21664360	2283	2	LOC_Os04g35560.1	73	LOC_Os04g35550.1;LOC_Os04g35560.1;LOC_Os04g35560.2	LOC_Os04g35550;LOC_Os04g35560;LOC_Os04g35560	0;0;0	Os04g0435500	glutathione S-transferase, putative, expressed	OsTCHQD1
LOC_Os04g35560	256.09	97.229	-1.394	4.262e-15	Chr4	21671263	21671763	501	*	5.96	6.84	3.25	3.59	1.06e-09	1.52e-07	Distal Intergenic	7	21662078	21664360	2283	2	LOC_Os04g35560.2	-6903				Os04g0435500	glutathione S-transferase, putative, expressed	OsTCHQD1
LOC_Os04g36054	1129.06	956.376	-0.636	0.01004	Chr4	22006509	22007009	501	*	5.13	6.11	-0.14	6.26	4.44e-07	9.95e-06	5' UTR	7	22006216	22012023	5808	1	LOC_Os04g36054.1	293	LOC_Os04g36054.1	LOC_Os04g36054	0	Os04g0442000	auxin response factor 9, putative, expressed
LOC_Os04g36070	742.239	87.846	-3.079	7.045e-97	Chr4	22035692	22036192	501	*	6.9	7.44	6.04	1.4	0.00438	0.0219	Distal Intergenic	7	22023832	22027680	3849	2	LOC_Os04g36070.1	-8012				Os04g0442300	OsRR1 type-A response regulator, expressed	OsRR1	auxin|crown|root|resistant|cytokinin|crown root|flower|transcription factor	The auxin responsive AP2/ERF transcription factor CROWN ROOTLESS5 is involved in crown root initiation in rice through the induction of OsRR1, a type-A response regulator of cytokinin signaling|Identification and characterization of cytokinin-signalling gene families in rice
LOC_Os04g36740	11.122	1.452	-2.942	0.01543	Chr4	22194017	22194517	501	*	5.32	6.1	3.5	2.6	0.005	0.0242	Promoter (<=1kb)	7	22192042	22194604	2563	2	LOC_Os04g36740.2	87	LOC_Os04g36730.1;LOC_Os04g36740.1;LOC_Os04g36740.2	LOC_Os04g36730;LOC_Os04g36740;LOC_Os04g36740	5003;0;0	Os04g0445000	potassium channel SKOR, putative, expressed	OsSKOR	root|seed|potassium	Differential gene expression of two outward-rectifying shaker-like potassium channels OsSKOR and OsGORK in rice
LOC_Os04g36740	11.122	1.452	-2.942	0.01543	Chr4	22192249	22192749	501	*	5.12	6.08	1.09	4.99	1.99e-07	5.47e-06	Exon (LOC_Os04g36740.2/LOC_Os04g36740, exon 6 of 8)	7	22192042	22194604	2563	2	LOC_Os04g36740.2	1855	LOC_Os04g36730.1;LOC_Os04g36740.1;LOC_Os04g36740.2	LOC_Os04g36730;LOC_Os04g36740;LOC_Os04g36740	3235;0;0	Os04g0445000	potassium channel SKOR, putative, expressed	OsSKOR	root|seed|potassium	Differential gene expression of two outward-rectifying shaker-like potassium channels OsSKOR and OsGORK in rice
LOC_Os04g36740	11.122	1.452	-2.942	0.01543	Chr4	22197075	22197575	501	*	5.44	6.42	-0.14	6.56	4.54e-08	1.87e-06	Promoter (<=1kb)	7	22192042	22197439	5398	2	LOC_Os04g36740.1	0	LOC_Os04g36740.1;LOC_Os04g36740.2	LOC_Os04g36740;LOC_Os04g36740	0;0	Os04g0445000	potassium channel SKOR, putative, expressed	OsSKOR	root|seed|potassium	Differential gene expression of two outward-rectifying shaker-like potassium channels OsSKOR and OsGORK in rice
LOC_Os04g36800	1555.34	527.777	-1.557	2.455e-67	Chr4	22220846	22221346	501	*	4.8	5.78	-0.14	5.92	2.18e-06	3.66e-05	Promoter (<=1kb)	7	22216909	22221345	4437	2	LOC_Os04g36800.1	0	LOC_Os04g36800.1;LOC_Os04g36800.2;LOC_Os04g36810.1	LOC_Os04g36800;LOC_Os04g36800;LOC_Os04g36810	0;0;0	Os04g0445700	3-oxoacyl-synthase, putative, expressed
LOC_Os04g36820	19.19	6.157	-1.656	0.04972	Chr4	22227783	22228283	501	*	5.91	6.42	5.09	1.34	0.00782	0.0338	Downstream (1-2kb)	7	22229872	22230571	700	2	LOC_Os04g36820.1	2288	LOC_Os04g36810.1;LOC_Os04g36820.1;LOC_Os04g36830.1	LOC_Os04g36810;LOC_Os04g36820;LOC_Os04g36830	0;0;-2962	Os04g0445900	expressed protein
LOC_Os04g37970	45.558	21.395	-1.078	0.01849	Chr4	22595139	22595639	501	*	5.65	6.38	4.08	2.3	0.0017	0.0104	Exon (LOC_Os04g37970.1/LOC_Os04g37970, exon 2 of 3)	7	22594108	22595839	1732	1	LOC_Os04g37970.1	1031	LOC_Os04g37960.1;LOC_Os04g37970.1;LOC_Os04g37980.1	LOC_Os04g37960;LOC_Os04g37970;LOC_Os04g37980	11683;0;0	Os04g0452600	transporter family protein, putative, expressed
LOC_Os04g37990	333.374	204.895	-0.699	8.933e-05	Chr4	22611791	22612291	501	*	5.52	6.51	-0.14	6.65	1.75e-08	9.6e-07	Promoter (<=1kb)	7	22611843	22620016	8174	1	LOC_Os04g37990.1	0	LOC_Os04g37990.1	LOC_Os04g37990	0	Os04g0453200	transporter family protein, putative, expressed
LOC_Os04g38026	623.489	387.176	-0.685	2.969e-08	Chr4	22639086	22639586	501	*	6.09	6.7	4.99	1.71	6.33e-05	0.000664	Distal Intergenic	7	22627207	22633284	6078	2	LOC_Os04g38026.1	-5802				Os04g0453233	transporter family protein, putative, expressed
LOC_Os04g38042	17.82	4.849	-1.883	0.01272	Chr4	22647799	22648299	501	*	6.07	6.62	5.16	1.45	0.00102	0.00695	Promoter (<=1kb)	7	22645052	22648129	3078	2	LOC_Os04g38042.1	0	LOC_Os04g38042.1;LOC_Os04g38060.1	LOC_Os04g38042;LOC_Os04g38060	0;0	Os04g0453500	retrotransposon protein, putative, unclassified, expressed
LOC_Os04g38400	6.681	0.59	-3.491	0.04508	Chr4	22834834	22835334	501	*	4.88	5.7	2.79	2.91	0.0104	0.0417	Exon (LOC_Os04g38400.1/LOC_Os04g38400, exon 1 of 1)	7	22834019	22835356	1338	1	LOC_Os04g38400.1	815	LOC_Os04g38400.1;LOC_Os04g38410.1;LOC_Os04g38420.1	LOC_Os04g38400;LOC_Os04g38410;LOC_Os04g38420	0;2260;0	Os04g0456900	ethylene-insensitive 3, putative, expressed
LOC_Os04g38530	459.024	211.448	-1.118	2.216e-17	Chr4	22892093	22892593	501	*	6.71	7.16	6.06	1.1	0.00271	0.015	Promoter (1-2kb)	7	22893765	22898657	4893	1	LOC_Os04g38530.1	-1172	LOC_Os04g38525.1;LOC_Os04g38520.1;LOC_Os04g38530.1	LOC_Os04g38525;LOC_Os04g38520;LOC_Os04g38530	0;0;0	Os04g0458300	aldose 1-epimerase, putative, expressed
LOC_Os04g38530	459.024	211.448	-1.118	2.216e-17	Chr4	22897781	22898281	501	*	7.22	7.68	6.54	1.14	0.00243	0.0138	Exon (LOC_Os04g38530.1/LOC_Os04g38530, exon 5 of 5)	7	22893765	22898657	4893	1	LOC_Os04g38530.1	4016	LOC_Os04g38530.1	LOC_Os04g38530	0	Os04g0458300	aldose 1-epimerase, putative, expressed
LOC_Os04g38680	2765.92	1816.91	-0.605	1.16e-17	Chr4	22977550	22978050	501	*	5.56	6.24	4.23	2.01	0.00261	0.0146	Promoter (<=1kb)	7	22977814	22980352	2539	1	LOC_Os04g38680.1	0	LOC_Os04g38680.1	LOC_Os04g38680	0	Os04g0460300	transmembrane amino acid transporter protein, putative, expressed
LOC_Os04g38680	2765.92	1816.91	-0.605	1.16e-17	Chr4	22978292	22978792	501	*	5.29	6.27	-0.14	6.41	1.63e-07	4.68e-06	Exon (LOC_Os04g38680.1/LOC_Os04g38680, exon 2 of 3)	7	22977814	22980352	2539	1	LOC_Os04g38680.1	478	LOC_Os04g38680.1	LOC_Os04g38680	0	Os04g0460300	transmembrane amino acid transporter protein, putative, expressed
LOC_Os04g38914	617.957	370.152	-0.741	9.567e-12	Chr4	23125629	23126129	501	*	5.05	6.03	-0.14	6.17	4.64e-07	1.03e-05	Promoter (<=1kb)	7	23125233	23126052	820	2	LOC_Os04g38914.1	0	LOC_Os04g38910.1;LOC_Os04g38914.1;LOC_Os04g38920.1	LOC_Os04g38910;LOC_Os04g38914;LOC_Os04g38920	0;0;0	Os04g0463100	expressed protein
LOC_Os04g39150	14.378	0.308	-5.47	0.0003766	Chr4	23278783	23279283	501	*	6.51	7.12	5.45	1.66	0.00598	0.0277	3' UTR	7	23278471	23279498	1028	1	LOC_Os04g39150.1	312	LOC_Os04g39140.1;LOC_Os04g39150.1	LOC_Os04g39140;LOC_Os04g39150	0;0	Os04g0465600	pathogenesis-related Bet v I family protein, putative, expressed
LOC_Os04g39190	1338.6	868.265	-0.622	5.56e-13	Chr4	23310325	23310825	501	*	6.42	6.91	5.68	1.23	0.00808	0.0347	Exon (LOC_Os04g39190.1/LOC_Os04g39190, exon 1 of 5)	7	23305691	23311347	5657	2	LOC_Os04g39190.1	522	LOC_Os04g39190.1;LOC_Os04g39200.1	LOC_Os04g39190;LOC_Os04g39200	0;1746	Os04g0466100	cell division protease ftsH homolog 4, putative, expressed
LOC_Os04g39489	1192.91	582.234	-1.036	6.677e-30	Chr4	23522556	23523056	501	*	6.52	7.19	5.24	1.95	1.44e-06	2.59e-05	Promoter (<=1kb)	7	23512378	23523092	10715	2	LOC_Os04g39489.1	36	LOC_Os04g39489.1;LOC_Os04g39489.2;LOC_Os04g39510.1	LOC_Os04g39489;LOC_Os04g39489;LOC_Os04g39510	0;0;-1139	Os04g0470700	amino acid transporter, putative, expressed
LOC_Os04g39489	1192.91	582.234	-1.036	6.677e-30	Chr4	23519669	23520169	501	*	5.86	6.44	4.87	1.57	0.00122	0.00804	Exon (LOC_Os04g39489.1/LOC_Os04g39489, exon 3 of 7)	7	23512378	23523092	10715	2	LOC_Os04g39489.1	2923	LOC_Os04g39489.1;LOC_Os04g39489.2	LOC_Os04g39489;LOC_Os04g39489	0;0	Os04g0470700	amino acid transporter, putative, expressed
LOC_Os04g40390	54.824	13.545	-2.029	3.356e-06	Chr4	24007382	24007882	501	*	6.58	7.15	5.63	1.52	0.00681	0.0305	Promoter (<=1kb)	7	24007307	24008008	702	1	LOC_Os04g40390.1	75	LOC_Os04g40380.1;LOC_Os04g40390.1	LOC_Os04g40380;LOC_Os04g40390	-1754;0	None	expressed protein
LOC_Os04g40470	59.309	13.442	-2.134	1.149e-07	Chr4	24050566	24051066	501	*	5.69	6.37	4.35	2.02	0.000978	0.00674	Promoter (<=1kb)	7	24049070	24051142	2073	2	LOC_Os04g40470.1	76	LOC_Os04g40470.1;LOC_Os04g40475.1	LOC_Os04g40470;LOC_Os04g40475	0;3410	Os04g0480700	cytochrome P450, putative, expressed
LOC_Os04g41400	76.981	27.295	-1.491	2.678e-05	Chr4	24547912	24548412	501	*	5.13	6.11	-0.14	6.25	2.67e-07	6.79e-06	Exon (LOC_Os04g41400.1/LOC_Os04g41400, exon 3 of 5)	7	24546341	24549172	2832	2	LOC_Os04g41400.1	760	LOC_Os04g41380.1;LOC_Os04g41390.1;LOC_Os04g41400.1;LOC_Os04g41410.1	LOC_Os04g41380;LOC_Os04g41390;LOC_Os04g41400;LOC_Os04g41410	0;0;0;4988	Os04g0491200	peptide transporter PTR2, putative, expressed
LOC_Os04g41540	224.146	121.846	-0.886	2.769e-06	Chr4	24640460	24640960	501	*	6.38	6.96	5.38	1.57	0.0116	0.0451	Promoter (<=1kb)	7	24640382	24641575	1194	1	LOC_Os04g41540.1	78	LOC_Os04g41540.1	LOC_Os04g41540	0	Os04g0492800	OsCML22 - Calmodulin-related calcium sensor protein, expressed
LOC_Os04g41800	96.408	44.438	-1.119	0.0001002	Chr4	24761151	24761651	501	*	6.59	7.18	5.58	1.59	9.47e-06	0.000128	Promoter (<=1kb)	7	24761107	24761707	601	1	LOC_Os04g41800.1	44	LOC_Os04g41790.1;LOC_Os04g41800.1	LOC_Os04g41790;LOC_Os04g41800	-1033;0	Os04g0495300	expressed protein
LOC_Os04g42310	209.168	132.69	-0.658	0.0005585	Chr4	25036189	25036689	501	*	5.96	6.46	5.19	1.26	0.0114	0.0447	Promoter (<=1kb)	7	25034970	25036582	1613	2	LOC_Os04g42310.1	0	LOC_Os04g42310.1;LOC_Os04g42320.1	LOC_Os04g42310;LOC_Os04g42320	0;0	Os04g0501500	B4-BTB3 - Bric-a-Brac, Tramtrack, Broad Complex BTB domain with B4 subfamily conserved sequence, expressed
LOC_Os04g42580	442.342	290.204	-0.611	1.465e-06	Chr4	25185906	25186406	501	*	6.39	6.87	5.67	1.19	0.00418	0.0211	Promoter (1-2kb)	7	25187851	25192745	4895	1	LOC_Os04g42580.1	-1445	LOC_Os04g42570.1;LOC_Os04g42580.1	LOC_Os04g42570;LOC_Os04g42580	0;0	Os04g0504600	carboxyvinyl-carboxyphosphonate phosphorylmutase, putative, expressed
LOC_Os04g43710	88.388	22.49	-1.975	5.286e-09	Chr4	25870916	25871416	501	*	5.55	6.36	3.52	2.84	0.00733	0.0323	Downstream (1-2kb)	7	25867807	25869189	1383	1	LOC_Os04g43710.1	3109	LOC_Os04g43710.1;LOC_Os04g43720.1	LOC_Os04g43710;LOC_Os04g43720	3109;6998	Os04g0517500	CAMK_CAMK_like.3 - CAMK includes calcium/calmodulin depedent protein kinases, expressed
LOC_Os04g43800	196.964	43.865	-2.168	2.669e-23	Chr4	25928970	25929470	501	*	6.05	6.73	4.73	2	0.00132	0.00855	Exon (LOC_Os04g43800.1/LOC_Os04g43800, exon 1 of 2)	7	25926988	25929732	2745	2	LOC_Os04g43800.1	262	LOC_Os04g43800.1	LOC_Os04g43800	0	Os04g0518400	phenylalanine ammonia-lyase, putative, expressed	OsPAL6	transcription factor	An R2R3 MYB transcription factor confers brown planthopper resistance by regulating the phenylalanine ammonia-lyase pathway in rice.
LOC_Os04g43800	196.964	43.865	-2.168	2.669e-23	Chr4	25927318	25927818	501	*	5.61	6.59	-0.14	6.73	1.56e-08	8.88e-07	3' UTR	7	25926988	25929732	2745	2	LOC_Os04g43800.1	1914	LOC_Os04g43790.1;LOC_Os04g43800.1	LOC_Os04g43790;LOC_Os04g43800	3367;0	Os04g0518400	phenylalanine ammonia-lyase, putative, expressed	OsPAL6	transcription factor	An R2R3 MYB transcription factor confers brown planthopper resistance by regulating the phenylalanine ammonia-lyase pathway in rice.
LOC_Os04g44224	9.802	0.305	-4.932	0.003049	Chr4	26190553	26191053	501	*	6.86	7.42	5.94	1.48	4.68e-06	6.95e-05	Distal Intergenic	7	26184978	26186908	1931	1	LOC_Os04g44224.1	5575				None	brain acid soluble protein 1, putative, expressed
LOC_Os04g44224	9.802	0.305	-4.932	0.003049	Chr4	26188104	26188604	501	*	6.48	6.91	5.86	1.05	0.00316	0.017	Distal Intergenic	7	26184978	26186908	1931	1	LOC_Os04g44224.1	3126	LOC_Os04g44224.1	LOC_Os04g44224	3126	None	brain acid soluble protein 1, putative, expressed
LOC_Os04g44500	75.026	27.796	-1.434	1.274e-05	Chr4	26343327	26343827	501	*	5.43	6.42	-0.14	6.56	2.79e-08	1.32e-06	Promoter (<=1kb)	7	26342443	26343781	1339	2	LOC_Os04g44500.1	0	LOC_Os04g44500.1	LOC_Os04g44500	0	Os04g0526800	GEM, putative, expressed
LOC_Os04g44560	474.746	266.245	-0.835	6.854e-12	Chr4	26375713	26376213	501	*	4.61	5.58	-0.14	5.72	2.12e-05	0.000258	Promoter (<=1kb)	7	26375704	26380073	4370	1	LOC_Os04g44560.1	9	LOC_Os04g44550.2;LOC_Os04g44550.1;LOC_Os04g44560.1	LOC_Os04g44550;LOC_Os04g44550;LOC_Os04g44560	3688;3667;0	Os04g0527800	expressed protein
LOC_Os04g44610	966.129	575.721	-0.745	5.926e-13	Chr4	26398148	26398648	501	*	7.16	7.69	6.29	1.41	9.63e-06	0.000129	3' UTR	7	26395912	26401662	5751	1	LOC_Os04g44610.1	2236	LOC_Os04g44610.1;LOC_Os04g44620.1	LOC_Os04g44610;LOC_Os04g44620	0;0	Os04g0528300	white-brown complex homolog protein 11, putative, expressed	OsABCG9	growth|transporter|cutin|ABC transporter	OsABCG9 Is an Important ABC Transporter of Cuticular Wax Deposition in Rice.
LOC_Os04g45090	671.469	415.999	-0.693	2.327e-10	Chr4	26674519	26675019	501	*	5.24	6.19	1.27	4.93	1.65e-07	4.73e-06	3' UTR	7	26674351	26676044	1694	2	LOC_Os04g45090.1	1025	LOC_Os04g45080.1;LOC_Os04g45090.2;LOC_Os04g45090.1;LOC_Os04g45100.1	LOC_Os04g45080;LOC_Os04g45090;LOC_Os04g45090;LOC_Os04g45100	-2535;0;0;0	Os04g0533500	cytochrome b561, putative, expressed
LOC_Os04g45210	1648.83	1065.52	-0.629	1.142e-12	Chr4	26720093	26720593	501	*	6.59	7.25	5.32	1.93	2.21e-06	3.7e-05	Promoter (<=1kb)	7	26720072	26721360	1289	1	LOC_Os04g45210.1	21	LOC_Os04g45200.1;LOC_Os04g45200.2;LOC_Os04g45210.1;LOC_Os04g45220.1	LOC_Os04g45200;LOC_Os04g45200;LOC_Os04g45210;LOC_Os04g45220	0;0;0;2027	Os04g0534600	peroxisomal biogenesis factor 11, putative, expressed
LOC_Os04g45520	126.368	59.457	-1.086	0.000221	Chr4	26932190	26932690	501	*	6.44	7.07	5.3	1.77	0.00974	0.0398	Promoter (<=1kb)	7	26931453	26932639	1187	2	LOC_Os04g45520.1	0	LOC_Os04g45520.1	LOC_Os04g45520	0	Os04g0538400	integral membrane protein, putative, expressed
LOC_Os04g45821	47.141	15.813	-1.58	0.0007561	Chr4	27128787	27129287	501	*	5.1	6.08	-0.14	6.22	1.43e-06	2.58e-05	Distal Intergenic	7	27133034	27135595	2562	1	LOC_Os04g45821.1	-3747				Os04g0541900	expressed protein
LOC_Os04g45821	47.141	15.813	-1.58	0.0007561	Chr4	27130873	27131373	501	*	6.75	7.22	6.05	1.17	0.0115	0.0449	Promoter (1-2kb)	7	27133034	27135595	2562	1	LOC_Os04g45821.1	-1661	LOC_Os04g45821.1	LOC_Os04g45821	-1661	Os04g0541900	expressed protein
LOC_Os04g46110	18.801	3.32	-2.487	0.00143	Chr4	27328046	27328546	501	*	5.74	6.5	4.04	2.45	6.3e-06	8.97e-05	Promoter (<=1kb)	7	27326622	27327503	882	2	LOC_Os04g46110.1	-543	LOC_Os04g46110.1;LOC_Os04g46120.1	LOC_Os04g46110;LOC_Os04g46120	0;0	Os04g0545300	fibroin heavy chain precursor, putative, expressed
LOC_Os04g46190	425.396	210.238	-1.02	1.481e-12	Chr4	27356953	27357453	501	*	5.97	6.84	3.45	3.39	0.00103	0.00701	Promoter (<=1kb)	7	27358198	27361232	3035	1	LOC_Os04g46190.1	-745	LOC_Os04g46180.2;LOC_Os04g46180.1;LOC_Os04g46190.1;LOC_Os04g46190.2	LOC_Os04g46180;LOC_Os04g46180;LOC_Os04g46190;LOC_Os04g46190	0;0;0;0	Os04g0546400	ubiquitin carboxyl-terminal hydrolase, family 1, putative, expressed
LOC_Os04g46320	40.95	16.93	-1.282	0.007912	Chr4	27462930	27463430	501	*	5.53	6.47	1.97	4.51	2.08e-07	5.66e-06	Promoter (<=1kb)	7	27460827	27463489	2663	2	LOC_Os04g46320.1	59	LOC_Os04g46310.2;LOC_Os04g46320.1	LOC_Os04g46310;LOC_Os04g46320	0;0	Os04g0548400	inactive receptor kinase At2g26730 precursor, putative, expressed
LOC_Os04g46350	62.405	37.837	-0.717	0.04187	Chr4	27477864	27478364	501	*	6.74	7.22	6.02	1.2	0.00885	0.0371	3' UTR	7	27477579	27479717	2139	2	LOC_Os04g46350.1	1353	LOC_Os04g46350.1	LOC_Os04g46350	0	Os04g0548700	homeobox associated leucine zipper, putative, expressed
LOC_Os04g46730	216.251	114.423	-0.923	3.265e-06	Chr4	27702762	27703262	501	*	4.59	5.52	1.27	4.25	3.86e-05	0.000433	Promoter (<=1kb)	7	27700859	27702768	1910	2	LOC_Os04g46730.1	0	LOC_Os04g46730.4;LOC_Os04g46730.1;LOC_Os04g46730.2;LOC_Os04g46730.3	LOC_Os04g46730;LOC_Os04g46730;LOC_Os04g46730;LOC_Os04g46730	0;0;-87;-106	Os04g0553300	thioesterase family protein, putative, expressed
LOC_Os04g46990	1591.43	974.44	-0.71	4.08e-17	Chr4	27853782	27854282	501	*	6.79	7.45	5.52	1.93	0.00052	0.004	Exon (LOC_Os04g46990.1/LOC_Os04g46990, exon 1 of 1)	7	27853301	27854963	1663	2	LOC_Os04g46990.1	681	LOC_Os04g46990.1	LOC_Os04g46990	0	Os04g0556600	cis-zeatin O-glucosyltransferase, putative, expressed	cZOGT2	shoot|crown|senescence|leaf|crown root|root	Cytokinin activity of cis-zeatin and phenotypic alterations induced by overexpression of putative cis-Zeatin-O-glucosyltransferase in rice
LOC_Os04g47220	12976.8	8460.31	-0.617	6.369e-25	Chr4	28048660	28049160	501	*	5.07	6.05	-0.14	6.19	4.48e-07	9.98e-06	Downstream (<1kb)	7	28046537	28048542	2006	1	LOC_Os04g47220.1	2123	LOC_Os04g47220.1;LOC_Os04g47240.1;LOC_Os04g47240.3;LOC_Os04g47240.2	LOC_Os04g47220;LOC_Os04g47240;LOC_Os04g47240;LOC_Os04g47240	2123;7946;7774;7728	Os04g0559700	aquaporin protein, putative, expressed	OsPIP1;2	arsenite|seed|root|shoot|leaf|growth|grain|photosynthesis|grain yield|yield|phloem|plasma membrane|sucrose	Members of rice plasma membrane intrinsic proteins subfamily are involved in arsenite permeability and tolerance in plants|The role of water channel proteins and nitric oxide signaling in rice seed germination|Overexpression of rice aquaporin OsPIP1;2 improves yield by enhancing mesophyll CO2 conductance and phloem sucrose transport.
LOC_Os04g47480	78.956	34.775	-1.181	0.0002691	Chr4	28171363	28171863	501	*	5.48	6.46	-0.14	6.6	2.25e-08	1.13e-06	Exon (LOC_Os04g47480.1/LOC_Os04g47480, exon 1 of 5)	7	28170285	28174275	3991	1	LOC_Os04g47480.1	1078	LOC_Os04g47480.1	LOC_Os04g47480	0	Os04g0562800	DUF630/DUF632 domains containing protein, putative, expressed
LOC_Os04g47520	295.255	148.336	-0.996	2.247e-10	Chr4	28188172	28188672	501	*	4.92	5.9	-0.14	6.04	2.57e-06	4.2e-05	Promoter (2-3kb)	7	28181772	28185366	3595	2	LOC_Os04g47520.2	-2806	LOC_Os04g47520.1;LOC_Os04g47520.2	LOC_Os04g47520;LOC_Os04g47520	0;0	Os04g0563000	growth regulator related protein, putative, expressed
LOC_Os04g48230	929.404	304.307	-1.611	4.687e-57	Chr4	28726863	28727363	501	*	6.77	7.43	5.52	1.9	0.00118	0.00781	Exon (LOC_Os04g48230.1/LOC_Os04g48230, exon 1 of 8)	7	28722495	28727647	5153	2	LOC_Os04g48230.1	284	LOC_Os04g48230.1;LOC_Os04g48230.2	LOC_Os04g48230;LOC_Os04g48230	0;0	Os04g0570800	dehydration response related protein, putative, expressed
LOC_Os04g48380	222.593	130.865	-0.773	0.0006537	Chr4	28855078	28855578	501	*	5.23	6.2	0.39	5.8	1.22e-07	3.78e-06	Distal Intergenic	7	28854056	28854955	900	1	LOC_Os04g48380.1	1022	LOC_Os04g48380.1	LOC_Os04g48380	0	Os04g0572800	lysM domain containing protein, putative, expressed
LOC_Os04g48380	222.593	130.865	-0.773	0.0006537	Chr4	28854059	28854559	501	*	6.24	6.77	5.39	1.39	0.00223	0.0129	Promoter (<=1kb)	7	28854056	28854955	900	1	LOC_Os04g48380.1	3	LOC_Os04g48375.1;LOC_Os04g48380.1	LOC_Os04g48375;LOC_Os04g48380	4792;0	Os04g0572800	lysM domain containing protein, putative, expressed
LOC_Os04g48380	222.593	130.865	-0.773	0.0006537	Chr4	28857898	28858398	501	*	5.63	6.6	1.09	5.51	2.24e-10	5.33e-08	Distal Intergenic	7	28854056	28854955	900	1	LOC_Os04g48380.1	3842	LOC_Os04g48380.1	LOC_Os04g48380	0	Os04g0572800	lysM domain containing protein, putative, expressed
LOC_Os04g48830	36.639	6.706	-2.456	5.171e-06	Chr4	29123168	29123668	501	*	5.63	6.46	3.46	3	0.000216	0.00191	Downstream (<1kb)	7	29121699	29123167	1469	1	LOC_Os04g48830.1	1469	LOC_Os04g48830.1;LOC_Os04g48840.1	LOC_Os04g48830;LOC_Os04g48840	0;3316	Os04g0577700	DUF623 domain containing protein, expressed
LOC_Os04g48870	38.69	0.911	-5.408	5.893e-08	Chr4	29144145	29144645	501	*	6.38	6.86	5.66	1.2	0.00365	0.019	Distal Intergenic	7	29152969	29153960	992	1	LOC_Os04g48870.1	-8324				Os04g0578300	nitrilase-associated protein, putative, expressed
LOC_Os04g48870	38.69	0.911	-5.408	5.893e-08	Chr4	29144774	29145274	501	*	6.34	6.8	5.65	1.15	0.00328	0.0175	Distal Intergenic	7	29152969	29153960	992	1	LOC_Os04g48870.1	-7695				Os04g0578300	nitrilase-associated protein, putative, expressed
LOC_Os04g48870	38.69	0.911	-5.408	5.893e-08	Chr4	29149154	29149654	501	*	5.69	6.42	4.09	2.34	6.55e-05	0.000683	Distal Intergenic	7	29152969	29153960	992	1	LOC_Os04g48870.1	-3315				Os04g0578300	nitrilase-associated protein, putative, expressed
LOC_Os04g48880	291.607	140.156	-1.053	1.568e-10	Chr4	29157489	29157989	501	*	5.71	6.66	1.97	4.69	3.95e-08	1.7e-06	Exon (LOC_Os04g48880.1/LOC_Os04g48880, exon 1 of 6)	7	29157213	29159281	2069	1	LOC_Os04g48880.1	276	LOC_Os04g48880.1;LOC_Os04g48890.1	LOC_Os04g48880;LOC_Os04g48890	0;0	Os04g0578400	fatty acid hydroxylase, putative, expressed
LOC_Os04g49210	72.022	23.91	-1.585	7.579e-06	Chr4	29345025	29345525	501	*	6.13	7.05	3.07	3.97	6.97e-06	9.75e-05	Distal Intergenic	7	29338950	29341166	2217	2	LOC_Os04g49210.1	-3859				Os04g0581100	naringenin,2-oxoglutarate 3-dioxygenase, putative, expressed
LOC_Os04g49440	216.228	19.361	-3.486	3.129e-42	Chr4	29499344	29499844	501	*	6.16	7.15	-0.14	7.29	7.92e-11	2.73e-08	Promoter (<=1kb)	7	29499367	29500598	1232	1	LOC_Os04g49440.1	0	LOC_Os04g49430.1;LOC_Os04g49440.3;LOC_Os04g49440.1;LOC_Os04g49450.1;LOC_Os04g49450.2	LOC_Os04g49430;LOC_Os04g49440;LOC_Os04g49440;LOC_Os04g49450;LOC_Os04g49450	0;0;0;3931;3931	Os04g0583800	RNA recognition motif containing protein, putative, expressed
LOC_Os04g49550	444.005	265.208	-0.745	2.367e-08	Chr4	29552348	29552848	501	*	5.69	6.51	3.61	2.9	0.00182	0.011	3' UTR	7	29551989	29553107	1119	2	LOC_Os04g49550.1	259	LOC_Os04g49550.1	LOC_Os04g49550	0	Os04g0585000	RING-H2 finger protein ATL2A, putative, expressed
LOC_Os04g49550	444.005	265.208	-0.745	2.367e-08	Chr4	29555097	29555597	501	*	6.04	6.98	2.43	4.55	3e-09	3e-07	Promoter (1-2kb)	7	29551989	29553107	1119	2	LOC_Os04g49550.1	-1990	LOC_Os04g49550.1;LOC_Os04g49560.1	LOC_Os04g49550;LOC_Os04g49560	0;7649	Os04g0585000	RING-H2 finger protein ATL2A, putative, expressed
LOC_Os04g49570	4113.2	2678.71	-0.618	6.085e-20	Chr4	29566950	29567450	501	*	5.11	5.86	3.49	2.37	0.000866	0.0061	Exon (LOC_Os04g49570.1/LOC_Os04g49570, exon 4 of 6)	7	29565558	29570115	4558	2	LOC_Os04g49570.1	2665	LOC_Os04g49570.2;LOC_Os04g49570.1	LOC_Os04g49570;LOC_Os04g49570	0;0	Os04g0585200	glutamate receptor, putative, expressed	GLR3.1	root apical meristem|cell division|seedling	A rice glutamate receptor-like gene is critical for the division and survival of individual cells in the root apical meristem.
LOC_Os04g49610	300.858	200.996	-0.586	0.0003388	Chr4	29586972	29587472	501	*	4.93	5.91	-0.14	6.05	9.75e-07	1.87e-05	Promoter (1-2kb)	7	29583835	29585675	1841	2	LOC_Os04g49610.2	-1297	LOC_Os04g49610.1;LOC_Os04g49610.2;LOC_Os04g49620.1	LOC_Os04g49610;LOC_Os04g49610;LOC_Os04g49620	-1297;-1297;3043	Os04g0585600	expressed protein
LOC_Os04g49650	20.146	1.45	-3.757	9.397e-05	Chr4	29604092	29604592	501	*	4.95	5.88	1.56	4.32	1e-05	0.000134	Downstream (1-2kb)	7	29605672	29607165	1494	2	LOC_Os04g49650.1	2573	LOC_Os04g49650.1;LOC_Os04g49650.2	LOC_Os04g49650;LOC_Os04g49650	0;0	Os04g0585900	DUF581 domain containing protein, expressed
LOC_Os04g49890	447.785	233.378	-0.938	1.713e-09	Chr4	29742492	29742992	501	*	4.89	5.87	-0.14	6.01	1.43e-06	2.58e-05	5' UTR	7	29742311	29750237	7927	1	LOC_Os04g49890.1	181	LOC_Os04g49880.1;LOC_Os04g49890.1	LOC_Os04g49880;LOC_Os04g49890	-2160;0	None	multidrug resistance-associated protein, putative, expressed
LOC_Os04g50780	88.201	57.747	-0.61	0.03862	Chr4	30044620	30045120	501	*	5.59	6.32	4	2.32	3.81e-05	0.000429	Promoter (<=1kb)	7	30044812	30045233	422	1	LOC_Os04g50780.1	0	LOC_Os04g50780.1;LOC_Os04g50790.1	LOC_Os04g50780;LOC_Os04g50790	0;5363	None	expressed protein
LOC_Os04g50870	175.588	76.543	-1.193	1.005e-08	Chr4	30089924	30090424	501	*	5.47	6.29	3.42	2.87	0.0069	0.0308	5' UTR	7	30085471	30093459	7989	2	LOC_Os04g50870.1	3035	LOC_Os04g50870.1	LOC_Os04g50870	0	Os04g0596500	elongation factor Tu, putative, expressed
LOC_Os04g51570	71.388	39.442	-0.854	0.0124	Chr4	30553286	30553786	501	*	6.3	6.84	5.42	1.42	0.00428	0.0215	3' UTR	7	30550961	30552136	1176	1	LOC_Os04g51570.1	2325	LOC_Os04g51570.1;LOC_Os04g51580.1;LOC_Os04g51580.2	LOC_Os04g51570;LOC_Os04g51580;LOC_Os04g51580	0;0;0	Os04g0605200	tyrosine phosphatase, putative, expressed
LOC_Os04g52280	51.377	23.543	-1.119	0.006879	Chr4	31069480	31069980	501	*	5.08	6.01	1.56	4.45	8.23e-06	0.000113	Promoter (<=1kb)	7	31069545	31075601	6057	1	LOC_Os04g52280.1	0	LOC_Os04g52270.1;LOC_Os04g52270.2;LOC_Os04g52280.1	LOC_Os04g52270;LOC_Os04g52270;LOC_Os04g52280	-606;-606;0	Os04g0612700	dehydrogenase, putative, expressed	FC1|OsCAD7	tiller|shoot|crown root|culm|height|cytokinin|branching|strigolactone|cell wall|panicle|meristem|shoot apical meristem|vascular bundle|growth|tillering|crown|root	FINE CULM1 (FC1) works downstream of strigolactones to inhibit the outgrowth of axillary buds in rice|FLEXIBLE CULM 1 encoding a cinnamyl-alcohol dehydrogenase controls culm mechanical strength in rice
LOC_Os04g52280	51.377	23.543	-1.119	0.006879	Chr4	31072132	31072632	501	*	6.02	6.51	5.29	1.22	0.0129	0.0489	Exon (LOC_Os04g52280.1/LOC_Os04g52280, exon 3 of 5)	7	31069545	31075601	6057	1	LOC_Os04g52280.1	2587	LOC_Os04g52280.1;LOC_Os04g52290.1	LOC_Os04g52280;LOC_Os04g52290	0;0	Os04g0612700	dehydrogenase, putative, expressed	FC1|OsCAD7	tiller|shoot|crown root|culm|height|cytokinin|branching|strigolactone|cell wall|panicle|meristem|shoot apical meristem|vascular bundle|growth|tillering|crown|root	FINE CULM1 (FC1) works downstream of strigolactones to inhibit the outgrowth of axillary buds in rice|FLEXIBLE CULM 1 encoding a cinnamyl-alcohol dehydrogenase controls culm mechanical strength in rice
LOC_Os04g53050	125.178	5.267	-4.595	4.537e-25	Chr4	31599937	31600437	501	*	5.6	6.53	2.19	4.34	2.34e-07	6.18e-06	Promoter (<=1kb)	7	31600121	31604201	4081	1	LOC_Os04g53050.1	0	LOC_Os04g53040.1;LOC_Os04g53050.1	LOC_Os04g53040;LOC_Os04g53050	13352;0	None	disease resistance RPP13-like protein 1, putative, expressed	PiPR1	blast disease|blast resistance	Genome-wide association study identifies an NLR gene that confers partial resistance to Magnaporthe oryzae in rice.
LOC_Os04g53120	251.344	26.008	-3.27	7.008e-42	Chr4	31637980	31638480	501	*	5.58	6.57	-0.14	6.71	1.09e-08	6.97e-07	Promoter (<=1kb)	7	31638099	31644795	6697	1	LOC_Os04g53120.1	0	LOC_Os04g53120.1	LOC_Os04g53120	0	None	NB-ARC domain containing protein, expressed	Xa1	bacterial blight|blight|disease|resistance	Expression of Xa1, a bacterial blight-resistance gene in rice, is induced by bacterial inoculation|Interfering TAL effectors of Xanthomonas oryzae neutralize R-gene-mediated plant disease resistance.
LOC_Os04g53760	620.681	290.76	-1.092	4.093e-22	Chr4	32041050	32041550	501	*	6.52	6.98	5.85	1.14	0.00376	0.0195	Promoter (1-2kb)	7	32033885	32039122	5238	2	LOC_Os04g53760.2	-1928	LOC_Os04g53760.1;LOC_Os04g53760.2;LOC_Os04g53770.1	LOC_Os04g53760;LOC_Os04g53760;LOC_Os04g53770	0;0;0	Os04g0629700	kinesin motor domain containing protein, putative, expressed
LOC_Os04g53800	91.248	28.394	-1.677	3.678e-08	Chr4	32061001	32061501	501	*	6.29	6.84	5.39	1.45	0.00173	0.0106	Exon (LOC_Os04g53800.1/LOC_Os04g53800, exon 3 of 6)	7	32059521	32062391	2871	1	LOC_Os04g53800.1	1480	LOC_Os04g53800.1;LOC_Os04g53810.1	LOC_Os04g53800;LOC_Os04g53810	0;0	Os04g0630300	leucoanthocyanidin reductase, putative, expressed
LOC_Os04g53810	2440.26	628.174	-1.958	2.156e-127	Chr4	32063676	32064577	902	*	6.4	7.11	4.98	2.13	3.59e-05	0.000408	Promoter (<=1kb)	7	32063705	32065859	2155	1	LOC_Os04g53810.1	0	LOC_Os04g53800.1;LOC_Os04g53810.1	LOC_Os04g53800;LOC_Os04g53810	0;0	Os04g0630400	leucoanthocyanidin reductase, putative, expressed
LOC_Os04g53930	167.561	98.192	-0.764	0.0007994	Chr4	32137309	32137809	501	*	6.03	6.72	4.66	2.06	0.00212	0.0124	Promoter (<=1kb)	7	32137818	32141183	3366	1	LOC_Os04g53930.1	-9	LOC_Os04g53920.1;LOC_Os04g53930.1;LOC_Os04g53930.2	LOC_Os04g53920;LOC_Os04g53930;LOC_Os04g53930	0;0;0	Os04g0631100	organic cation transporter protein, putative, expressed
LOC_Os04g53998	149.094	95.824	-0.635	0.00432	Chr4	32181519	32182019	501	*	6.35	6.86	5.55	1.31	0.0043	0.0216	Exon (LOC_Os04g53998.1/LOC_Os04g53998, exon 1 of 7)	7	32178133	32182246	4114	2	LOC_Os04g53998.1	227	LOC_Os04g53998.1;LOC_Os04g53996.1	LOC_Os04g53998;LOC_Os04g53996	0;2532	Os04g0632100	kinase, putative, expressed
LOC_Os04g54010	76.253	10.988	-2.792	2.763e-11	Chr4	32196331	32196831	501	*	6.6	7.22	5.49	1.73	0.000332	0.00274	Promoter (<=1kb)	7	32193893	32196603	2711	2	LOC_Os04g54010.1	0	LOC_Os04g54010.1;LOC_Os04g54020.1	LOC_Os04g54010;LOC_Os04g54020	0;0	Os04g0632600	serine/threonine-protein kinase receptor precursor, putative, expressed
LOC_Os04g54560	225.551	149.106	-0.594	0.0007358	Chr4	32449421	32449921	501	*	5.81	6.65	3.51	3.14	0.0025	0.0141	Exon (LOC_Os04g54560.1/LOC_Os04g54560, exon 1 of 2)	7	32448490	32450325	1836	2	LOC_Os04g54560.1	404	LOC_Os04g54560.1;LOC_Os04g54564.1	LOC_Os04g54560;LOC_Os04g54564	0;0	Os04g0638100	transferase family protein, putative, expressed
LOC_Os04g54800	594.944	318.175	-0.905	1.991e-14	Chr4	32585197	32585697	501	*	5.17	6.09	1.98	4.11	3.79e-07	8.79e-06	Promoter (<=1kb)	7	32582126	32585724	3599	2	LOC_Os04g54800.3	27	LOC_Os04g54800.3;LOC_Os04g54800.1;LOC_Os04g54800.2	LOC_Os04g54800;LOC_Os04g54800;LOC_Os04g54800	0;0;0	Os04g0640600	shikimate kinase, putative, expressed	OsSK3	panicle	Identification of three shikimate kinase genes in rice: characterization of their differential expression during panicle development and of the enzymatic activities of the encoded proteins
LOC_Os04g54810	508.864	124.618	-2.029	2.976e-46	Chr4	32593001	32593501	501	*	6.41	7.03	5.29	1.73	0.000664	0.0049	Exon (LOC_Os04g54810.1/LOC_Os04g54810, exon 2 of 7)	7	32588940	32595893	6954	2	LOC_Os04g54810.1	2392	LOC_Os04g54810.1	LOC_Os04g54810	0	Os04g0640700	beta-D-xylosidase, putative, expressed
LOC_Os04g54810	508.864	124.618	-2.029	2.976e-46	Chr4	32595473	32595973	501	*	6.21	6.85	5.02	1.82	7.43e-05	0.000763	Promoter (<=1kb)	7	32588940	32595893	6954	2	LOC_Os04g54810.1	0	LOC_Os04g54810.1	LOC_Os04g54810	0	Os04g0640700	beta-D-xylosidase, putative, expressed
LOC_Os04g55670	487.668	185.224	-1.396	4.761e-28	Chr4	33138955	33139455	501	*	5.95	6.94	-0.14	7.08	2.49e-10	5.62e-08	Exon (LOC_Os04g55670.1/LOC_Os04g55670, exon 1 of 3)	7	33137071	33140263	3193	2	LOC_Os04g55670.1	808	LOC_Os04g55670.1	LOC_Os04g55670	0	Os04g0650300	glycosyltransferase family 43 protein, putative, expressed
LOC_Os04g57720	569.069	362.885	-0.649	1.658e-07	Chr4	34381489	34381989	501	*	6.05	6.58	5.22	1.36	0.0113	0.0443	Downstream (1-2kb)	7	34375978	34377357	1380	1	LOC_Os04g57720.1	5511	LOC_Os04g57730.1	LOC_Os04g57730	5908	Os04g0673300	OsRR6 type-A response regulator, expressed	OsRR6	salinity|root|seedling|dwarf|cytokinin|abiotic stress|temperature|shoot|panicle	Molecular characterization and differential expression of cytokinin-responsive type-A response regulators in rice (Oryza sativa)|Overexpression of a type-A response regulator alters rice morphology and cytokinin metabolism
LOC_Os04g57720	569.069	362.885	-0.649	1.658e-07	Chr4	34369296	34369796	501	*	5.55	6.33	3.71	2.62	3.57e-05	0.000406	Distal Intergenic	7	34375978	34377357	1380	1	LOC_Os04g57720.1	-6182				Os04g0673300	OsRR6 type-A response regulator, expressed	OsRR6	salinity|root|seedling|dwarf|cytokinin|abiotic stress|temperature|shoot|panicle	Molecular characterization and differential expression of cytokinin-responsive type-A response regulators in rice (Oryza sativa)|Overexpression of a type-A response regulator alters rice morphology and cytokinin metabolism
LOC_Os04g58840	12.727	3.037	-2.089	0.0367	Chr4	34998258	34998758	501	*	5.38	6.31	2.14	4.17	5.11e-06	7.49e-05	3' UTR	7	34997071	34999168	2098	1	LOC_Os04g58840.1	1187	LOC_Os04g58840.1;LOC_Os04g58850.1	LOC_Os04g58840;LOC_Os04g58850	0;0	Os04g0685200	Eukaryotic aspartyl protease domain containing protein, expressed
LOC_Os04g58860	41.193	16.213	-1.339	0.004203	Chr4	35011449	35011949	501	*	7	7.58	6.02	1.56	0.0005	0.00387	Exon (LOC_Os04g58860.1/LOC_Os04g58860, exon 1 of 1)	7	35010940	35012452	1513	2	LOC_Os04g58860.1	503	LOC_Os04g58860.1	LOC_Os04g58860	0	Os04g0685400	harpin-induced protein 1 domain containing protein, expressed	OsNDR1
LOC_Os04g59330	186.823	101.111	-0.878	4.133e-05	Chr4	35277841	35278341	501	*	6.47	6.92	5.81	1.11	0.00359	0.0188	5' UTR	7	35277603	35279154	1552	1	LOC_Os04g59330.1	238	LOC_Os04g59320.1;LOC_Os04g59330.1;LOC_Os04g59340.1	LOC_Os04g59320;LOC_Os04g59330;LOC_Os04g59340	0;0;0	Os04g0689500	expressed protein
LOC_Os04g59330	186.823	101.111	-0.878	4.133e-05	Chr4	35275879	35276379	501	*	4.97	5.95	-0.14	6.09	8.16e-07	1.61e-05	Promoter (1-2kb)	7	35277603	35279154	1552	1	LOC_Os04g59330.1	-1224	LOC_Os04g59320.1;LOC_Os04g59330.1	LOC_Os04g59320;LOC_Os04g59330	0;0	Os04g0689500	expressed protein
LOC_Os04g59440	225.949	77.234	-1.551	1.795e-15	Chr4	35337384	35337884	501	*	5.68	6.54	3.31	3.23	0.00225	0.013	Exon (LOC_Os04g59440.1/LOC_Os04g59440, exon 1 of 1)	7	35337067	35338192	1126	1	LOC_Os04g59440.1	317	LOC_Os04g59440.1	LOC_Os04g59440	0	Os04g0690800	chlorophyll A-B binding protein, putative, expressed	psbS2
LOC_Os04g59440	225.949	77.234	-1.551	1.795e-15	Chr4	35338791	35339291	501	*	4.76	5.74	-0.14	5.88	4.23e-06	6.38e-05	Distal Intergenic	7	35337067	35338192	1126	1	LOC_Os04g59440.1	1724	LOC_Os04g59440.1	LOC_Os04g59440	0	Os04g0690800	chlorophyll A-B binding protein, putative, expressed	psbS2
LOC_Os04g59494	10193.6	5358.87	-0.928	6.615e-48	Chr4	35369052	35369552	501	*	4.78	5.61	2.56	3.05	0.0099	0.0403	Promoter (<=1kb)	7	35369083	35381254	12172	1	LOC_Os04g59494.4	0	LOC_Os04g59494.4;LOC_Os04g59494.1;LOC_Os04g59494.2	LOC_Os04g59494;LOC_Os04g59494;LOC_Os04g59494	0;0;0	Os04g0691500	transportin-2, putative, expressed
LOC_Os04g59520	797.517	485.616	-0.714	7.017e-11	Chr4	35399701	35400201	501	*	6.65	7.15	5.88	1.27	0.000223	0.00196	Exon (LOC_Os04g59520.1/LOC_Os04g59520, exon 1 of 1)	7	35398604	35402604	4001	1	LOC_Os04g59520.1	1097	LOC_Os04g59520.1	LOC_Os04g59520	0	Os04g0691800	anthranilate phosphoribosyltransferase, putative, expressed
LOC_Os05g02230	87.098	46.297	-0.907	0.003686	Chr5	706964	707464	501	*	6.13	6.76	5.01	1.74	0.00203	0.012	Exon (LOC_Os05g02230.1/LOC_Os05g02230, exon 2 of 2)	8	706799	707862	1064	1	LOC_Os05g02230.1	165	LOC_Os05g02220.5;LOC_Os05g02220.1;LOC_Os05g02220.2;LOC_Os05g02220.3;LOC_Os05g02220.4;LOC_Os05g02230.1	LOC_Os05g02220;LOC_Os05g02220;LOC_Os05g02220;LOC_Os05g02220;LOC_Os05g02220;LOC_Os05g02230	7961;5478;5478;5477;4460;0	Os05g0113100	expressed protein
LOC_Os05g03610	245.476	162.225	-0.598	0.0003948	Chr5	1539117	1539617	501	*	5.75	6.59	3.45	3.14	0.0037	0.0192	Exon (LOC_Os05g03610.1/LOC_Os05g03610, exon 4 of 8)	8	1535708	1541571	5864	1	LOC_Os05g03610.1	3409	LOC_Os05g03610.1	LOC_Os05g03610	0	Os05g0127200	phospholipase C, putative, expressed	OsPLC4	growth|seedling|salinity|salt|salt stress|stress|stress response	Phosphatidylinositol-hydrolyzing phospholipase C4 modulates rice response to salt and drought.
LOC_Os05g04120	582.653	247.766	-1.23	9.451e-23	Chr5	1846425	1846925	501	*	5.17	6.15	-0.14	6.29	3.1e-07	7.58e-06	Exon (LOC_Os05g04120.1/LOC_Os05g04120, exon 8 of 10)	8	1846097	1848754	2658	2	LOC_Os05g04120.1	1829	LOC_Os05g04100.1;LOC_Os05g04110.1;LOC_Os05g04120.1;LOC_Os05g04130.1	LOC_Os05g04100;LOC_Os05g04110;LOC_Os05g04120;LOC_Os05g04130	0;-1872;0;-2274	Os05g0131500	ferroportin1 domain containing protein, expressed
LOC_Os05g06340	1925.86	1198.24	-0.686	6.706e-18	Chr5	3250605	3251105	501	*	4.73	5.56	2.53	3.03	0.00495	0.024	3' UTR	8	3245204	3247503	2300	2	LOC_Os05g06340.1	-3102	LOC_Os05g06350.1	LOC_Os05g06350	0	Os05g0155400	GATA zinc finger domain containing protein, expressed
LOC_Os05g06710	585.329	366.02	-0.677	1.268e-08	Chr5	3496307	3496807	501	*	4.71	5.68	-0.14	5.82	7.81e-06	0.000108	Promoter (<=1kb)	8	3492616	3496759	4144	2	LOC_Os05g06710.1	0	LOC_Os05g06710.1;LOC_Os05g06720.1;LOC_Os05g06720.2;LOC_Os05g06720.3	LOC_Os05g06710;LOC_Os05g06720;LOC_Os05g06720;LOC_Os05g06720	0;4019;4019;4019	Os05g0159200	GDSL-like lipase/acylhydrolase, putative, expressed
LOC_Os05g07140	73.412	37.197	-0.973	0.002673	Chr5	3772505	3773005	501	*	6.58	7.14	5.65	1.49	0.00095	0.00658	Exon (LOC_Os05g07140.1/LOC_Os05g07140, exon 1 of 1)	8	3772400	3773192	793	1	LOC_Os05g07140.1	105	LOC_Os05g07130.1;LOC_Os05g07130.2;LOC_Os05g07140.1	LOC_Os05g07130;LOC_Os05g07130;LOC_Os05g07140	0;0;0	Os05g0164200	zinc finger, C3HC4 type domain containing protein, expressed
LOC_Os05g07560	84.517	51.699	-0.721	0.03541	Chr5	4046457	4046957	501	*	7.04	7.51	6.34	1.17	0.011	0.0435	3' UTR	8	4043730	4048020	4291	1	LOC_Os05g07560.1	2727	LOC_Os05g07550.1;LOC_Os05g07560.1	LOC_Os05g07550;LOC_Os05g07560	-2832;0	Os05g0167300	expressed protein
LOC_Os05g07560	84.517	51.699	-0.721	0.03541	Chr5	4048088	4048588	501	*	5.86	6.64	4.03	2.61	3.48e-07	8.25e-06	Distal Intergenic	8	4043730	4048020	4291	1	LOC_Os05g07560.1	4358	LOC_Os05g07560.1	LOC_Os05g07560	0	Os05g0167300	expressed protein
LOC_Os05g07890	225.383	115.408	-0.966	2.344e-07	Chr5	4262749	4263249	501	*	6.43	6.98	5.53	1.45	0.00159	0.00993	Exon (LOC_Os05g07890.1/LOC_Os05g07890, exon 1 of 2)	8	4262641	4263514	874	1	LOC_Os05g07890.1	108	LOC_Os05g07880.1;LOC_Os05g07880.2;LOC_Os05g07890.1	LOC_Os05g07880;LOC_Os05g07880;LOC_Os05g07890	0;0;0	Os05g0171200	embryo-specific 3, putative, expressed
LOC_Os05g09724	1798.01	668.843	-1.426	2.598e-79	Chr5	5510026	5510526	501	*	7.03	7.52	6.28	1.23	0.000199	0.00178	Promoter (<=1kb)	8	5508396	5510290	1895	2	LOC_Os05g09724.1	0	LOC_Os05g09724.1;LOC_Os05g09728.1	LOC_Os05g09724;LOC_Os05g09728	0;0	Os05g0189900	HAD superfamily phosphatase, putative, expressed
LOC_Os05g10210	600.255	142.546	-2.071	2.336e-54	Chr5	5548651	5549577	927	*	7.06	7.6	6.19	1.4	1.11e-05	0.000146	Distal Intergenic	8	5553628	5554934	1307	2	LOC_Os05g10210.1	5357				Os05g0190500	HAD superfamily phosphatase, putative, expressed
LOC_Os05g11010	150.418	74.79	-1.013	6.908e-06	Chr5	6165437	6165937	501	*	6.59	7.25	5.33	1.91	2.26e-05	0.000273	Exon (LOC_Os05g11010.1/LOC_Os05g11010, exon 1 of 1)	8	6164997	6166289	1293	2	LOC_Os05g11010.1	352	LOC_Os05g11010.1	LOC_Os05g11010	0	Os05g0199100	harpin-induced protein 1 domain containing protein, expressed
LOC_Os05g12130	85.385	47.139	-0.852	0.003813	Chr5	6935683	6936183	501	*	5.55	6.18	4.41	1.77	0.00162	0.01	Exon (LOC_Os05g12130.1/LOC_Os05g12130, exon 1 of 1)	8	6933857	6936591	2735	1	LOC_Os05g12130.1	1826	LOC_Os05g12130.1;LOC_Os05g12140.1;LOC_Os05g12140.2	LOC_Os05g12130;LOC_Os05g12140;LOC_Os05g12140	0;3588;3588	Os05g0212100	EMB2261, putative, expressed
LOC_Os05g12130	85.385	47.139	-0.852	0.003813	Chr5	6934005	6934505	501	*	5.33	6.29	1.09	5.2	4.73e-08	1.91e-06	Exon (LOC_Os05g12130.1/LOC_Os05g12130, exon 1 of 1)	8	6933857	6936591	2735	1	LOC_Os05g12130.1	148	LOC_Os05g12130.1;LOC_Os05g12140.1;LOC_Os05g12140.2	LOC_Os05g12130;LOC_Os05g12140;LOC_Os05g12140	0;5266;5266	Os05g0212100	EMB2261, putative, expressed
LOC_Os05g13620	25.266	9.421	-1.438	0.01955	Chr5	7550137	7550637	501	*	6.65	7.08	6.02	1.06	0.00905	0.0377	Promoter (1-2kb)	8	7552496	7553896	1401	1	LOC_Os05g13620.1	-1859	LOC_Os05g13610.1;LOC_Os05g13620.1	LOC_Os05g13610;LOC_Os05g13620	6066;0	Os05g0223200	RNA recognition motif containing protein, putative, expressed
LOC_Os05g13860	349.485	202.028	-0.791	5.883e-08	Chr5	7704918	7705418	501	*	7.1	7.62	6.27	1.35	0.000222	0.00196	Promoter (<=1kb)	8	7705502	7708006	2505	1	LOC_Os05g13860.1	-84	LOC_Os05g13860.1	LOC_Os05g13860	0	Os05g0226300	expressed protein
LOC_Os05g13900	14.163	3.262	-2.098	0.02236	Chr5	7722778	7723278	501	*	6.47	6.9	5.85	1.05	0.0129	0.049	Promoter (<=1kb)	8	7721628	7723149	1522	2	LOC_Os05g13900.1	0	LOC_Os05g13900.1	LOC_Os05g13900	0	Os05g0226900	retrotransposon protein, putative, unclassified, expressed	OsPRP|RePRP1.1	seedling|shoot|root|jasmonate|submergence|growth	Isolation and characterization of a gene for a repetitive proline rich protein (OsPRP) down-regulated during submergence in rice (Oryza sativa)
LOC_Os05g13940	28459.9	11814.7	-1.268	3.958e-142	Chr5	7748629	7749129	501	*	5.5	6.17	4.21	1.96	0.000544	0.00415	Promoter (<=1kb)	8	7746396	7748295	1900	2	LOC_Os05g13940.1	-334	LOC_Os05g13940.1	LOC_Os05g13940	-334	Os05g0227600	retrotransposon protein, putative, unclassified, expressed	RePRP1.2
LOC_Os05g15770	13580.1	7015.44	-0.953	2.692e-76	Chr5	8903117	8903617	501	*	6.7	7.29	5.68	1.61	6e-05	0.000635	Exon (LOC_Os05g15770.1/LOC_Os05g15770, exon 1 of 1)	8	8902479	8903793	1315	2	LOC_Os05g15770.1	176	LOC_Os05g15770.1;LOC_Os05g15780.1	LOC_Os05g15770;LOC_Os05g15780	0;3162	Os05g0247100	glycosyl hydrolase, putative, expressed	OsHI-XIP	growth|resistance|development|brown planthopper	Overexpression of a Xylanase Inhibitor Gene, OsHI-XIP, Enhances Resistance in Rice to Herbivores
LOC_Os05g16300	31.347	8.825	-1.836	0.0009716	Chr5	9233253	9233753	501	*	6.83	7.29	6.15	1.13	0.0104	0.0416	Exon (LOC_Os05g16300.1/LOC_Os05g16300, exon 1 of 2)	8	9232254	9234349	2096	2	LOC_Os05g16300.1	596	LOC_Os05g16300.1	LOC_Os05g16300	0	Os05g0252100	expressed protein
LOC_Os05g18604	554.241	339.635	-0.705	6.805e-10	Chr5	10788921	10789421	501	*	6.59	7.15	5.66	1.5	1.6e-05	0.000202	Exon (LOC_Os05g18604.2/LOC_Os05g18604, exon 5 of 10)	8	10774611	10790744	16134	2	LOC_Os05g18604.3	1323	LOC_Os05g18604.2;LOC_Os05g18604.3;LOC_Os05g18604.1;LOC_Os05g18604.4;LOC_Os05g18604.6;LOC_Os05g18604.5	LOC_Os05g18604;LOC_Os05g18604;LOC_Os05g18604;LOC_Os05g18604;LOC_Os05g18604;LOC_Os05g18604	0;0;0;0;0;0	Os05g0268500	OsSCP28 - Putative Serine Carboxypeptidase homologue, expressed
LOC_Os05g19010	83.766	46.518	-0.845	0.006391	Chr5	11030256	11030756	501	*	6.04	6.95	3.07	3.88	2.89e-05	0.000338	Distal Intergenic	8	11029122	11030058	937	1	LOC_Os05g19010.1	1134	LOC_Os05g19000.1;LOC_Os05g19010.1;LOC_Os05g19020.1	LOC_Os05g19000;LOC_Os05g19010;LOC_Os05g19020	0;0;-2818	Os05g0272400	expressed protein
LOC_Os05g26840	489.043	304.163	-0.685	1.484e-08	Chr5	15571445	15571945	501	*	4.86	5.75	2.14	3.61	0.000707	0.00517	Downstream (2-3kb)	8	15574252	15576162	1911	2	LOC_Os05g26840.1	4217	LOC_Os05g26840.1	LOC_Os05g26840	0	Os05g0332600	permease domain containing protein, putative, expressed
LOC_Os05g26840	489.043	304.163	-0.685	1.484e-08	Chr5	15575289	15575789	501	*	6.5	7.15	5.27	1.88	0.00214	0.0125	Exon (LOC_Os05g26840.1/LOC_Os05g26840, exon 1 of 1)	8	15574252	15576162	1911	2	LOC_Os05g26840.1	373	LOC_Os05g26840.1	LOC_Os05g26840	0	Os05g0332600	permease domain containing protein, putative, expressed
LOC_Os05g27000	25.245	2.138	-3.569	2.15e-05	Chr5	15698948	15699448	501	*	7.07	7.5	6.44	1.07	0.00338	0.0179	Exon (LOC_Os05g27000.1/LOC_Os05g27000, exon 1 of 2)	8	15698625	15700879	2255	1	LOC_Os05g27000.1	323	LOC_Os05g27000.1	LOC_Os05g27000	0	Os05g0335500	expressed protein
LOC_Os05g29860	1312.36	655.159	-1.002	1.031e-32	Chr5	17281351	17281851	501	*	5.36	6.17	3.37	2.8	0.00848	0.036	Promoter (<=1kb)	8	17276738	17280614	3877	2	LOC_Os05g29860.3	-737	LOC_Os05g29860.1;LOC_Os05g29860.2;LOC_Os05g29860.3;LOC_Os05g29870.1	LOC_Os05g29860;LOC_Os05g29860;LOC_Os05g29860;LOC_Os05g29870	-737;-737;-737;-1722	Os05g0361900	mitochondrial carrier protein, putative, expressed
LOC_Os05g30010	99.672	60.428	-0.728	0.007699	Chr5	17370606	17371106	501	*	5.88	6.43	4.97	1.46	0.00326	0.0174	Promoter (1-2kb)	8	17361511	17368926	7416	2	LOC_Os05g30010.1	-1680	LOC_Os05g30010.1	LOC_Os05g30010	-1680	Os05g0363500	WD domain, G-beta repeat domain containing protein, expressed
LOC_Os05g31750	3114.25	1357.78	-1.199	2.004e-69	Chr5	18495244	18495744	501	*	5.26	6.25	-0.14	6.39	2.26e-07	6e-06	Exon (LOC_Os05g31750.1/LOC_Os05g31750, exon 2 of 5)	8	18494331	18496597	2267	2	LOC_Os05g31750.1	853	LOC_Os05g31750.1	LOC_Os05g31750	0	Os05g0382600	annexin, putative, expressed
LOC_Os05g31910	75.551	46.69	-0.695	0.02944	Chr5	18576016	18576516	501	*	6.38	7	5.27	1.73	0.000964	0.00666	3' UTR	8	18575666	18578838	3173	2	LOC_Os05g31910.1	2322	LOC_Os05g31910.1;LOC_Os05g31910.2	LOC_Os05g31910;LOC_Os05g31910	0;0	Os05g0384600	white-brown complex homolog protein 16, putative, expressed
LOC_Os05g31910	75.551	46.69	-0.695	0.02944	Chr5	18585144	18585644	501	*	6.06	6.86	4.1	2.76	1.64e-07	4.7e-06	Downstream (1-2kb)	8	18575666	18578864	3199	2	LOC_Os05g31910.2	-6280	LOC_Os05g31920.1;LOC_Os05g31920.2	LOC_Os05g31920;LOC_Os05g31920	9799;9799	Os05g0384600	white-brown complex homolog protein 16, putative, expressed
LOC_Os05g32820	4042.01	2190.86	-0.883	7.309e-25	Chr5	19222590	19223090	501	*	6.1	6.78	4.79	1.99	0.00129	0.00842	Exon (LOC_Os05g32820.1/LOC_Os05g32820, exon 1 of 1)	8	19222115	19224440	2326	2	LOC_Os05g32820.1	1350	LOC_Os05g32820.1	LOC_Os05g32820	0	Os05g0395000	peptide-N4-asparagine amidase A, putative, expressed
LOC_Os05g33090	569.968	332.827	-0.78	5.443e-10	Chr5	19402443	19402943	501	*	7.03	7.58	6.14	1.44	0.00034	0.00281	Promoter (2-3kb)	8	19405305	19406797	1493	1	LOC_Os05g33090.1	-2362	LOC_Os05g33080.1;LOC_Os05g33090.1	LOC_Os05g33080;LOC_Os05g33090	0;0	None	expressed protein
LOC_Os05g33320	98.09	62.581	-0.645	0.02446	Chr5	19532555	19533055	501	*	4.99	5.9	1.97	3.94	0.00016	0.00148	Exon (LOC_Os05g33320.1/LOC_Os05g33320, exon 1 of 2)	8	19531187	19533381	2195	2	LOC_Os05g33320.1	326	LOC_Os05g33320.1	LOC_Os05g33320	0	None	expressed protein
LOC_Os05g33840	16842.3	8923.73	-0.916	2.561e-43	Chr5	19959577	19960077	501	*	6.83	7.36	6	1.36	0.00622	0.0285	Intron (LOC_Os05g33840.1/LOC_Os05g33840, intron 4 of 8)	8	19957139	19963120	5982	2	LOC_Os05g33840.1	3043	LOC_Os05g33840.1	LOC_Os05g33840	0	Os05g0408900	transketolase, putative, expressed	CLA1|OsDXS1|OsDXS2
LOC_Os05g33900	444.225	177.578	-1.32	4.715e-22	Chr5	19999249	19999749	501	*	6.55	7.34	4.67	2.67	3.43e-07	8.15e-06	Promoter (<=1kb)	8	19997533	19999567	2035	2	LOC_Os05g33900.1	0	LOC_Os05g33900.1;LOC_Os05g33910.1	LOC_Os05g33900;LOC_Os05g33910	0;0	Os05g0409500	auxin-induced protein 5NG4, putative, expressed
LOC_Os05g34150	5.213	0.308	-3.986	0.04097	Chr5	20194055	20194555	501	*	6.37	6.79	5.77	1.02	0.00856	0.0362	Promoter (<=1kb)	8	20192361	20193786	1426	2	LOC_Os05g34150.1	-269	LOC_Os05g34150.1;LOC_Os05g34160.1	LOC_Os05g34150;LOC_Os05g34160	0;0	Os05g0412800	glutathione S-transferase, putative, expressed
LOC_Os05g34170	390.661	227.768	-0.778	7.748e-08	Chr5	20204722	20205222	501	*	5.18	6.16	-0.14	6.3	5.84e-07	1.23e-05	Exon (LOC_Os05g34170.2/LOC_Os05g34170, exon 2 of 4)	8	20204127	20207554	3428	1	LOC_Os05g34170.3	595	LOC_Os05g34170.2;LOC_Os05g34170.3	LOC_Os05g34170;LOC_Os05g34170	0;0	Os05g0413200	tubulin/FtsZ domain containing protein, putative, expressed
LOC_Os05g35290	111.85	25.893	-2.104	1.479e-10	Chr5	20954212	20954712	501	*	6.24	6.77	5.4	1.36	0.00856	0.0362	Exon (LOC_Os05g35290.1/LOC_Os05g35290, exon 1 of 1)	8	20953410	20955923	2514	2	LOC_Os05g35290.1	1211	LOC_Os05g35274.2;LOC_Os05g35274.5;LOC_Os05g35290.1	LOC_Os05g35274;LOC_Os05g35274;LOC_Os05g35290	-2843;-2835;0	Os05g0427400	phenylalanine ammonia-lyase, putative, expressed
LOC_Os05g38219	7.65	0.922	-3.065	0.03591	Chr5	22406416	22406916	501	*	5.52	6.38	3.07	3.31	0.00159	0.00991	Promoter (<=1kb)	8	22406439	22410427	3989	1	LOC_Os05g38219.2	0	LOC_Os05g38190.2;LOC_Os05g38210.1;LOC_Os05g38219.2;LOC_Os05g38219.1;LOC_Os05g38230.1;LOC_Os05g38230.3;LOC_Os05g38230.2	LOC_Os05g38190;LOC_Os05g38210;LOC_Os05g38219;LOC_Os05g38219;LOC_Os05g38230;LOC_Os05g38230;LOC_Os05g38230	8527;-189;0;0;0;0;0	Os05g0456100	expressed protein
LOC_Os05g38350	51.582	18.224	-1.502	0.0001549	Chr5	22483570	22484070	501	*	6.7	7.19	5.95	1.24	0.000359	0.00294	Exon (LOC_Os05g38350.1/LOC_Os05g38350, exon 2 of 2)	8	22481303	22484545	3243	1	LOC_Os05g38350.1	2267	LOC_Os05g38350.1	LOC_Os05g38350	0	Os05g0457800	glycerol-3-phosphate acyltransferase 8, putative, expressed
LOC_Os05g38470	29.085	8.303	-1.824	0.002531	Chr5	22569256	22569756	501	*	6.07	6.92	3.71	3.21	1.85e-09	2.2e-07	Exon (LOC_Os05g38470.2/LOC_Os05g38470, exon 4 of 4)	8	22568049	22570970	2922	1	LOC_Os05g38470.1	1207	LOC_Os05g38470.2;LOC_Os05g38470.1	LOC_Os05g38470;LOC_Os05g38470	0;0	Os05g0459200	expressed protein
LOC_Os05g39350	481.374	199.998	-1.265	5.649e-24	Chr5	23083157	23083657	501	*	7.1	7.76	5.84	1.92	1.81e-06	3.14e-05	Exon (LOC_Os05g39350.1/LOC_Os05g39350, exon 1 of 3)	8	23080869	23083761	2893	2	LOC_Os05g39350.1	104	LOC_Os05g39340.1;LOC_Os05g39350.1	LOC_Os05g39340;LOC_Os05g39350	4493;0	Os05g0470000	PMR5, putative, expressed
LOC_Os05g39990	461.519	177.679	-1.378	3.269e-25	Chr5	23494848	23495348	501	*	6.61	7.21	5.55	1.66	0.00832	0.0354	Downstream (<1kb)	8	23495606	23497572	1967	2	LOC_Os05g39990.1	2224	LOC_Os05g39990.1	LOC_Os05g39990	0	Os05g0477600	expansin precursor, putative, expressed
LOC_Os05g40000	84.184	34.589	-1.279	8.36e-05	Chr5	23504272	23504772	501	*	6.48	7.07	5.47	1.6	6.59e-05	0.000686	Promoter (<=1kb)	8	23502667	23504193	1527	2	LOC_Os05g40000.1	-79	LOC_Os05g40000.1	LOC_Os05g40000	-79	Os05g0477800	expressed protein
LOC_Os05g40200	116.322	56.443	-1.045	0.0001068	Chr5	23610412	23610912	501	*	5.52	6.47	1.54	4.93	7.75e-09	5.6e-07	Promoter (<=1kb)	8	23605419	23611006	5588	2	LOC_Os05g40200.1	94	LOC_Os05g40200.1	LOC_Os05g40200	0	Os05g0480400	inactive receptor kinase At2g26730 precursor, putative, expressed
LOC_Os05g41630	64.237	37.516	-0.78	0.03653	Chr5	24377327	24377827	501	*	6.28	6.97	4.88	2.09	2.87e-07	7.17e-06	Promoter (<=1kb)	8	24376912	24377903	992	2	LOC_Os05g41630.1	76	LOC_Os05g41610.1;LOC_Os05g41620.1;LOC_Os05g41630.1;LOC_Os05g41640.1;LOC_Os05g41640.3;LOC_Os05g41640.2	LOC_Os05g41610;LOC_Os05g41620;LOC_Os05g41630;LOC_Os05g41640;LOC_Os05g41640;LOC_Os05g41640	0;2352;0;3935;3935;3935	Os05g0496100	translation initiation factor eIF3 subunit, putative, expressed
LOC_Os05g42110	119.012	76.652	-0.643	0.01798	Chr5	24626478	24626978	501	*	5.25	6.2	1.27	4.93	4.05e-07	9.24e-06	Promoter (<=1kb)	8	24626346	24626852	507	2	LOC_Os05g42110.1	0	LOC_Os05g42100.1;LOC_Os05g42110.1;LOC_Os05g42120.1	LOC_Os05g42100;LOC_Os05g42110;LOC_Os05g42120	0;0;-243	Os05g0500450	allyl alcohol dehydrogenase, putative, expressed
LOC_Os05g42130	541.277	204.761	-1.404	1.202e-24	Chr5	24631048	24631548	501	*	5.35	6.16	3.34	2.82	0.00259	0.0145	Promoter (<=1kb)	8	24631172	24632715	1544	1	LOC_Os05g42130.1	0	LOC_Os05g42120.1;LOC_Os05g42130.1;LOC_Os05g42140.1	LOC_Os05g42120;LOC_Os05g42130;LOC_Os05g42140	3827;0;-1473	Os05g0500600	MONOCULM 1, putative, expressed
LOC_Os05g42140	25.536	9.545	-1.433	0.02889	Chr5	24638490	24638990	501	*	5.79	6.39	4.74	1.65	0.00111	0.00745	Distal Intergenic	8	24633021	24633940	920	1	LOC_Os05g42140.1	5469				Os05g0500700	methyltransferase domain containing protein, expressed
LOC_Os05g42190	47.65	11.897	-2.006	9.21e-06	Chr5	24669927	24670427	501	*	5.5	6.35	3.16	3.19	2.53e-05	0.000301	Exon (LOC_Os05g42190.1/LOC_Os05g42190, exon 3 of 3)	8	24669652	24673135	3484	2	LOC_Os05g42190.1	2708	LOC_Os05g42190.1	LOC_Os05g42190	0	Os05g0501300	NADPH-dependent FMN reductase domain containing protein, expressed
LOC_Os05g42340	33.766	15.424	-1.152	0.02375	Chr5	24774706	24775206	501	*	5.85	6.61	4.13	2.48	1.39e-05	0.000178	Promoter (<=1kb)	8	24774717	24775631	915	1	LOC_Os05g42340.1	0	LOC_Os05g42340.1;LOC_Os05g42350.1	LOC_Os05g42340;LOC_Os05g42350	0;6846	Os05g0503100	ubiquitin E3 ligase ICP0, putative, expressed
LOC_Os05g43880	25.097	0.926	-4.789	8.521e-06	Chr5	25515132	25515632	501	*	6.58	7.31	5.06	2.25	5.94e-06	8.53e-05	Exon (LOC_Os05g43880.1/LOC_Os05g43880, exon 2 of 2)	8	25515053	25516204	1152	2	LOC_Os05g43880.1	572	LOC_Os05g43880.1	LOC_Os05g43880	0	Os05g0514600	gibberellin 2-beta-dioxygenase, putative, expressed	SBI	resistance|yield|culm|lodging|lodging resistance|breeding|height	Shortened Basal Internodes Encodes a Gibberellin 2-Oxidase and Contributes to Lodging Resistance in Rice.
LOC_Os05g44210	917.883	597.886	-0.62	7.325e-11	Chr5	25705535	25706035	501	*	6.88	7.45	5.91	1.53	0.000981	0.00675	Distal Intergenic	8	25713720	25720299	6580	1	LOC_Os05g44210.1	-7685				Os05g0518600	trehalose-6-phosphate synthase, putative, expressed	OsTPS1	seedling|salinity|drought|abiotic stress|cold stress|salt|transcription factor	Overexpression of the trehalose-6-phosphate synthase gene OsTPS1 enhances abiotic stress tolerance in rice|Characterization of a drought-responsive gene, OsTPS1, identified by the T-DNA gene-trap system in rice
LOC_Os05g44330	1010.98	530.977	-0.928	3.654e-25	Chr5	25797708	25798208	501	*	5.56	6.5	2.06	4.44	4.05e-07	9.24e-06	Exon (LOC_Os05g44330.3/LOC_Os05g44330, exon 2 of 7)	8	25796297	25803236	6940	1	LOC_Os05g44330.5	1411	LOC_Os05g44330.3;LOC_Os05g44330.4;LOC_Os05g44330.1;LOC_Os05g44330.2;LOC_Os05g44330.5	LOC_Os05g44330;LOC_Os05g44330;LOC_Os05g44330;LOC_Os05g44330;LOC_Os05g44330	0;0;0;0;0	Os05g0519600	DJ-1 family protein, putative, expressed
LOC_Os05g44610	200.79	96.182	-1.063	1.442e-08	Chr5	25951694	25952194	501	*	5.94	6.48	5.07	1.41	0.0109	0.0432	Promoter (<=1kb)	8	25952719	25955835	3117	1	LOC_Os05g44610.1	-525	LOC_Os05g44600.1;LOC_Os05g44610.1;LOC_Os05g44610.4	LOC_Os05g44600;LOC_Os05g44610;LOC_Os05g44610	0;-525;-525	Os05g0521700	expressed protein
LOC_Os05g45080	197.266	115.639	-0.769	0.0001425	Chr5	26193353	26193853	501	*	5.47	6.45	-0.14	6.59	2.05e-08	1.06e-06	Exon (LOC_Os05g45080.1/LOC_Os05g45080, exon 1 of 1)	8	26192929	26194777	1849	1	LOC_Os05g45080.1	424	LOC_Os05g45070.1;LOC_Os05g45080.1;LOC_Os05g45090.1	LOC_Os05g45070;LOC_Os05g45080;LOC_Os05g45090	0;0;0	Os05g0526800	anthocyanidin 5,3-O-glucosyltransferase, putative, expressed
LOC_Os05g45150	9.399	1.466	-2.649	0.03543	Chr5	26215642	26216142	501	*	6.31	6.85	5.42	1.43	0.00269	0.015	Exon (LOC_Os05g45150.1/LOC_Os05g45150, exon 3 of 3)	8	26215283	26218140	2858	2	LOC_Os05g45150.1	1998	LOC_Os05g45150.1;LOC_Os05g45160.1	LOC_Os05g45150;LOC_Os05g45160	0;-2407	Os05g0527600	anthocyanidin 5,3-O-glucosyltransferase, putative, expressed
LOC_Os05g45930	88.778	38.886	-1.186	0.000146	Chr5	26614229	26614729	501	*	5.84	6.43	4.84	1.58	0.00162	0.01	Promoter (1-2kb)	8	26616540	26620925	4386	1	LOC_Os05g45930.1	-1811	LOC_Os05g45920.1;LOC_Os05g45930.1;LOC_Os05g45930.2	LOC_Os05g45920;LOC_Os05g45930;LOC_Os05g45930	5945;-1811;-1811	Os05g0535900	IQ calmodulin-binding motif family protein, putative, expressed
LOC_Os05g46340	2392.98	1343.58	-0.832	5.081e-29	Chr5	26858949	26859449	501	*	6.58	7.13	5.7	1.42	0.00457	0.0226	Exon (LOC_Os05g46340.1/LOC_Os05g46340, exon 1 of 1)	8	26858364	26860249	1886	2	LOC_Os05g46340.1	800	LOC_Os05g46330.1;LOC_Os05g46340.1	LOC_Os05g46330;LOC_Os05g46340	9142;0	Os05g0540900	expressed protein
LOC_Os05g46610	66.524	9.953	-2.739	1.906e-11	Chr5	26988283	26988783	501	*	5.05	6.03	-0.14	6.17	3.01e-06	4.79e-05	Exon (LOC_Os05g46610.1/LOC_Os05g46610, exon 3 of 3)	8	26987334	26989077	1744	1	LOC_Os05g46610.1	949	LOC_Os05g46610.1;LOC_Os05g46620.1	LOC_Os05g46610;LOC_Os05g46620	0;6378	Os05g0543600	myb-like DNA-binding domain containing protein, putative, expressed
LOC_Os05g47510	69.323	40.115	-0.778	0.0229	Chr5	27219579	27220079	501	*	6.04	6.89	3.69	3.2	0.00194	0.0115	Exon (LOC_Os05g47510.1/LOC_Os05g47510, exon 1 of 1)	8	27219015	27220337	1323	1	LOC_Os05g47510.1	564	LOC_Os05g47500.1;LOC_Os05g47510.1;LOC_Os05g47520.1	LOC_Os05g47500;LOC_Os05g47510;LOC_Os05g47520	7666;0;3564	Os05g0548600	pentatricopeptide, putative, expressed
LOC_Os05g48270	336.578	99.147	-1.763	1.032e-28	Chr5	27666036	27666536	501	*	5.34	6.32	-0.14	6.46	5.61e-08	2.16e-06	Promoter (<=1kb)	8	27666326	27669442	3117	1	LOC_Os05g48270.1	0	LOC_Os05g48260.1;LOC_Os05g48270.1	LOC_Os05g48260;LOC_Os05g48270	0;0	Os05g0556400	auxin-responsive protein, putative, expressed
LOC_Os05g48270	336.578	99.147	-1.763	1.032e-28	Chr5	27668645	27669145	501	*	5.71	6.66	1.77	4.89	3.35e-09	3.23e-07	3' UTR	8	27666326	27669442	3117	1	LOC_Os05g48270.1	2319	LOC_Os05g48270.1	LOC_Os05g48270	0	Os05g0556400	auxin-responsive protein, putative, expressed
LOC_Os05g48850	101.281	36.13	-1.49	1.147e-07	Chr5	28003955	28004455	501	*	5.87	6.86	0.49	6.36	1.67e-10	4.39e-08	Exon (LOC_Os05g48850.1/LOC_Os05g48850, exon 2 of 3)	8	28003165	28005001	1837	1	LOC_Os05g48850.1	790	LOC_Os05g48850.1;LOC_Os05g48855.1	LOC_Os05g48850;LOC_Os05g48855	0;0	Os05g0563000	no apical meristem protein, putative, expressed	OsSND2	transcription factor|cellulose|biomass|biomass production	OsSND2, a NAC family transcription factor, is involved in secondary cell wall biosynthesis through regulating MYBs expression in rice.
LOC_Os05g49320	1409.85	586.708	-1.265	5.547e-24	Chr5	28299706	28300206	501	*	5.92	6.68	4.22	2.47	0.000228	0.002	Promoter (<=1kb)	8	28299340	28300084	745	2	LOC_Os05g49320.1	0	LOC_Os05g49310.1;LOC_Os05g49320.1;LOC_Os05g49330.1	LOC_Os05g49310;LOC_Os05g49320;LOC_Os05g49330	0;0;-929	Os05g0568300	ribosomal protein L7/L12 C-terminal domain containing protein, expressed
LOC_Os05g50380	78.192	45.737	-0.779	0.01335	Chr5	28871954	28872454	501	*	4.69	5.66	-0.14	5.81	4.54e-06	6.79e-05	3' UTR	8	28871794	28876879	5086	2	LOC_Os05g50380.2	4425	LOC_Os05g50370.1;LOC_Os05g50380.2;LOC_Os05g50380.1	LOC_Os05g50370;LOC_Os05g50380;LOC_Os05g50380	7902;0;0	Os05g0580000	glucose-1-phosphate adenylyltransferase large subunit, chloroplast precursor, putative, expressed	OsAPL3	starch|seed development| ABA |seed	Gene expression of ADP-glucose pyrophosphorylase and starch contents in rice cultured cells are cooperatively regulated by sucrose and ABA
LOC_Os05g50510	237.52	156.013	-0.603	0.0009066	Chr5	28967776	28968276	501	*	6.61	7.21	5.55	1.66	0.0103	0.0415	Promoter (1-2kb)	8	28960225	28965956	5732	2	LOC_Os05g50510.1	-1820	LOC_Os05g50510.1	LOC_Os05g50510	-1820	Os05g0582100	CAS1 domain-containing protein 1 precursor, putative, expressed
LOC_Os05g50600	475.431	262.626	-0.851	4.99e-09	Chr5	29006483	29006983	501	*	6.2	6.79	5.18	1.61	0.0017	0.0105	Downstream (2-3kb)	8	29004107	29005849	1743	1	LOC_Os05g50600.1	2376	LOC_Os05g50600.1;LOC_Os05g50610.1	LOC_Os05g50600;LOC_Os05g50610	0;0	Os05g0582800	OsSCP31 - Putative Serine Carboxypeptidase homologue, expressed
LOC_Os05g50750	171.675	56.394	-1.606	4.693e-13	Chr5	29093608	29094108	501	*	5.67	6.33	4.43	1.9	0.00256	0.0144	3' UTR	8	29093561	29098272	4712	2	LOC_Os05g50750.3	4164	LOC_Os05g50740.1;LOC_Os05g50750.1;LOC_Os05g50750.2;LOC_Os05g50750.3	LOC_Os05g50740;LOC_Os05g50750;LOC_Os05g50750;LOC_Os05g50750	9641;0;0;0	Os05g0584600	AAA family ATPase, putative, expressed
LOC_Os05g50750	171.675	56.394	-1.606	4.693e-13	Chr5	29098422	29098922	501	*	4.8	5.78	-0.14	5.92	2.21e-06	3.69e-05	Promoter (<=1kb)	8	29093548	29098856	5309	2	LOC_Os05g50750.1	0	LOC_Os05g50750.1;LOC_Os05g50750.2;LOC_Os05g50750.3	LOC_Os05g50750;LOC_Os05g50750;LOC_Os05g50750	0;0;0	Os05g0584600	AAA family ATPase, putative, expressed
LOC_Os05g50800	144.262	35.443	-2.032	2.985e-13	Chr5	29137442	29137942	501	*	4.86	5.84	-0.14	5.98	1.77e-06	3.08e-05	Promoter (<=1kb)	8	29137463	29140249	2787	1	LOC_Os05g50800.1	0	LOC_Os05g50790.1;LOC_Os05g50800.1;LOC_Os05g50800.2;LOC_Os05g50810.1;LOC_Os05g50810.2	LOC_Os05g50790;LOC_Os05g50800;LOC_Os05g50800;LOC_Os05g50810;LOC_Os05g50810	0;0;0;0;0	Os05g0585400	expressed protein
LOC_Os05g50830	79.593	41.935	-0.927	0.00266	Chr5	29154620	29155120	501	*	6.3	6.85	5.39	1.46	0.00324	0.0173	Promoter (<=1kb)	8	29154625	29157437	2813	1	LOC_Os05g50830.1	0	LOC_Os05g50820.1;LOC_Os05g50830.1;LOC_Os05g50830.2;LOC_Os05g50840.1;LOC_Os05g50840.2	LOC_Os05g50820;LOC_Os05g50830;LOC_Os05g50830;LOC_Os05g50840;LOC_Os05g50840	-2348;0;0;0;0	Os05g0585800	protein kinase family protein, putative, expressed
LOC_Os05g50830	79.593	41.935	-0.927	0.00266	Chr5	29155873	29156373	501	*	6.25	7.02	4.52	2.5	0.00253	0.0142	3' UTR	8	29154625	29157437	2813	1	LOC_Os05g50830.2	1248	LOC_Os05g50830.1;LOC_Os05g50830.2;LOC_Os05g50840.1;LOC_Os05g50840.2	LOC_Os05g50830;LOC_Os05g50830;LOC_Os05g50840;LOC_Os05g50840	0;0;0;0	Os05g0585800	protein kinase family protein, putative, expressed
LOC_Os05g51190	75.226	29.089	-1.369	2.73e-05	Chr5	29364359	29364859	501	*	5.11	6.09	-0.14	6.23	4e-07	9.14e-06	Promoter (<=1kb)	8	29359911	29364695	4785	2	LOC_Os05g51190.4	0	LOC_Os05g51190.5;LOC_Os05g51190.3;LOC_Os05g51190.4;LOC_Os05g51190.2;LOC_Os05g51200.1	LOC_Os05g51190;LOC_Os05g51190;LOC_Os05g51190;LOC_Os05g51190;LOC_Os05g51200	0;0;0;0;6476	Os05g0589700	protein kinase family protein, putative, expressed
LOC_Os05g51190	75.226	29.089	-1.369	2.73e-05	Chr5	29362103	29362603	501	*	4.83	5.7	2.33	3.37	4.99e-05	0.000541	Exon (LOC_Os05g51190.5/LOC_Os05g51190, exon 5 of 8)	8	29359911	29364121	4211	2	LOC_Os05g51190.5	1518	LOC_Os05g51180.1;LOC_Os05g51190.5;LOC_Os05g51190.3;LOC_Os05g51190.4;LOC_Os05g51190.2	LOC_Os05g51180;LOC_Os05g51190;LOC_Os05g51190;LOC_Os05g51190;LOC_Os05g51190	6130;0;0;0;0	Os05g0589700	protein kinase family protein, putative, expressed
LOC_Os05g51240	879.977	300.45	-1.552	2.686e-44	Chr5	29386288	29386788	501	*	6.11	7.07	1.74	5.33	2.61e-12	2.65e-09	3' UTR	8	29385916	29388154	2239	2	LOC_Os05g51240.1	1366	LOC_Os05g51230.1;LOC_Os05g51240.1	LOC_Os05g51230;LOC_Os05g51240	0;0	Os05g0590300	hydrolase, alpha/beta fold family domain containing protein, expressed
LOC_Os05g51240	879.977	300.45	-1.552	2.686e-44	Chr5	29387676	29388176	501	*	6.65	7.1	5.98	1.13	0.00217	0.0126	Promoter (<=1kb)	8	29385916	29388154	2239	2	LOC_Os05g51240.1	0	LOC_Os05g51240.1	LOC_Os05g51240	0	Os05g0590300	hydrolase, alpha/beta fold family domain containing protein, expressed
LOC_Os05g51240	879.977	300.45	-1.552	2.686e-44	Chr5	29385187	29385687	501	*	6.31	6.86	5.41	1.45	0.00716	0.0317	Downstream (<1kb)	8	29385916	29388154	2239	2	LOC_Os05g51240.1	2467	LOC_Os05g51230.1;LOC_Os05g51240.1	LOC_Os05g51230;LOC_Os05g51240	0;0	Os05g0590300	hydrolase, alpha/beta fold family domain containing protein, expressed
LOC_Os06g01250	2954.79	1320.28	-1.163	2.461e-64	Chr6	164493	164993	501	*	6	6.9	3.07	3.83	2.58e-05	0.000306	3' UTR	9	163205	165539	2335	1	LOC_Os06g01250.1	1288	LOC_Os06g01240.1;LOC_Os06g01250.1;LOC_Os06g01260.1	LOC_Os06g01240;LOC_Os06g01250;LOC_Os06g01260	-2498;0;-2371	Os06g0102100	cytochrome P450, putative, expressed	CYP93G2
LOC_Os06g01934	955.509	540.15	-0.825	8.563e-16	Chr6	523273	523773	501	*	6.15	6.79	4.97	1.82	0.00331	0.0176	Exon (LOC_Os06g01934.1/LOC_Os06g01934, exon 1 of 4)	9	523053	530057	7005	1	LOC_Os06g01934.1	220	LOC_Os06g01934.1	LOC_Os06g01934	0	Os06g0108900	homeobox domain containing protein, expressed
LOC_Os06g01990	94.178	31.953	-1.566	3.045e-06	Chr6	555577	556077	501	*	5.75	6.44	4.34	2.1	0.0123	0.0471	3' UTR	9	555518	556547	1030	2	LOC_Os06g01990.1	470	LOC_Os06g01980.1;LOC_Os06g01990.1	LOC_Os06g01980;LOC_Os06g01990	0;0	Os06g0109500	phosphoglycolate phosphatase, plasmid, putative, expressed
LOC_Os06g03800	798.501	378.566	-1.078	2.044e-24	Chr6	1520734	1521234	501	*	4.93	5.76	2.74	3.02	0.00204	0.0121	Promoter (<=1kb)	9	1520743	1526081	5339	1	LOC_Os06g03800.1	0	LOC_Os06g03800.1;LOC_Os06g03800.2	LOC_Os06g03800;LOC_Os06g03800	0;0	Os06g0128600	pollen ankyrin, putative, expressed
LOC_Os06g03830	392.631	160.412	-1.293	3.968e-20	Chr6	1538977	1539477	501	*	5.11	6.09	-0.14	6.23	2.94e-07	7.29e-06	Promoter (<=1kb)	9	1539028	1542212	3185	1	LOC_Os06g03830.1	0	LOC_Os06g03830.1;LOC_Os06g03830.2	LOC_Os06g03830;LOC_Os06g03830	0;0	Os06g0129100	retinol dehydrogenase, putative, expressed
LOC_Os06g03890	46.583	21.543	-1.105	0.02164	Chr6	1565583	1566083	501	*	6.06	6.76	4.66	2.1	0.0106	0.0423	Promoter (<=1kb)	9	1565577	1566225	649	1	LOC_Os06g03890.1	6	LOC_Os06g03880.1;LOC_Os06g03890.1	LOC_Os06g03880;LOC_Os06g03890	-392;0	Os06g0129600	alpha-L-fucosidase 3 precursor, putative, expressed	OsGLIP1	leaf|resistance|defense|disease|salicylic acid|disease resistance|immunity|immune response|pathogen	GDSL lipases modulate immunity through lipid homeostasis in rice.
LOC_Os06g03900	51.113	21.05	-1.28	0.0016	Chr6	1573317	1573817	501	*	5.71	6.69	1.09	5.59	1.09e-10	3.42e-08	3' UTR	9	1572422	1574148	1727	1	LOC_Os06g03900.1	895	LOC_Os06g03900.1;LOC_Os06g03910.1	LOC_Os06g03900;LOC_Os06g03910	0;0	None	esterase precursor, putative, expressed	OsGLIP1	leaf|resistance|defense|disease|salicylic acid|disease resistance|immunity|immune response|pathogen	GDSL lipases modulate immunity through lipid homeostasis in rice.
LOC_Os06g04070	4149.58	2159.21	-0.941	1.854e-28	Chr6	1677691	1678191	501	*	5.87	6.84	0.78	6.06	5.01e-12	4.16e-09	Promoter (<=1kb)	9	1674045	1677406	3362	2	LOC_Os06g04070.1	-285	LOC_Os06g04070.1	LOC_Os06g04070	0	Os06g0131300	pyridoxal-dependent decarboxylase protein, putative, expressed	OsADC1	seedling|chilling	Molecular cloning and characterization of an arginine decarboxylase gene up-regulated by chilling stress in rice seedlings
LOC_Os06g04070	4149.58	2159.21	-0.941	1.854e-28	Chr6	1680019	1680519	501	*	5.48	6.07	4.45	1.62	0.00435	0.0218	Promoter (2-3kb)	9	1674045	1677406	3362	2	LOC_Os06g04070.1	-2613	LOC_Os06g04070.1	LOC_Os06g04070	0	Os06g0131300	pyridoxal-dependent decarboxylase protein, putative, expressed	OsADC1	seedling|chilling	Molecular cloning and characterization of an arginine decarboxylase gene up-regulated by chilling stress in rice seedlings
LOC_Os06g04070	4149.58	2159.21	-0.941	1.854e-28	Chr6	1676339	1676839	501	*	4.98	5.8	2.89	2.92	0.00919	0.0381	5' UTR	9	1674045	1677406	3362	2	LOC_Os06g04070.1	567	LOC_Os06g04070.1	LOC_Os06g04070	0	Os06g0131300	pyridoxal-dependent decarboxylase protein, putative, expressed	OsADC1	seedling|chilling	Molecular cloning and characterization of an arginine decarboxylase gene up-regulated by chilling stress in rice seedlings
LOC_Os06g04090	125.949	20.394	-2.635	3.504e-19	Chr6	1700058	1700558	501	*	5.87	6.53	4.61	1.92	0.00204	0.0121	Exon (LOC_Os06g04090.1/LOC_Os06g04090, exon 3 of 3)	9	1699371	1702859	3489	2	LOC_Os06g04090.1	2301	LOC_Os06g04090.1	LOC_Os06g04090	0	Os06g0131700	no apical meristem protein, putative, expressed	OsSWN1	lignin	Change in lignin structure, but not in lignin content, in transgenic poplar overexpressing the rice master regulator of secondary cell wall biosynthesis.
LOC_Os06g04150	4803.62	2801.22	-0.779	1.119e-19	Chr6	1737875	1738375	501	*	4.85	5.73	2.19	3.54	0.000473	0.0037	Promoter (2-3kb)	9	1733935	1735135	1201	2	LOC_Os06g04150.1	-2740	LOC_Os06g04150.1;LOC_Os06g04169.2;LOC_Os06g04169.1	LOC_Os06g04150;LOC_Os06g04169;LOC_Os06g04169	-2740;0;0	Os06g0132400	magnesium-protoporphyrin O-methyltransferase, putative, expressed	YGL18	leaf|growth|map-based cloning|plant growth	Impaired Magnesium Protoporphyrin IX Methyltransferase (ChlM) Impedes Chlorophyll Synthesis and Plant Growth in Rice.
LOC_Os06g04250	82.8	42.485	-0.963	0.007074	Chr6	1789887	1790387	501	*	5.24	5.98	3.63	2.35	0.00477	0.0234	Promoter (<=1kb)	9	1789836	1791394	1559	1	LOC_Os06g04250.1	51	LOC_Os06g04250.1	LOC_Os06g04250	0	Os06g0133600	phosphate-induced protein 1 conserved region domain containing protein, expressed
LOC_Os06g04920	4087.4	1324.2	-1.627	1.003e-77	Chr6	2169320	2169820	501	*	5.77	6.36	4.76	1.6	0.00258	0.0144	Promoter (<=1kb)	9	2162622	2169683	7062	2	LOC_Os06g04920.2	0	LOC_Os06g04920.2;LOC_Os06g04920.1;LOC_Os06g04930.1	LOC_Os06g04920;LOC_Os06g04920;LOC_Os06g04930	0;0;0	Os06g0141200	zinc finger family protein, putative, expressed	OsZFP1|SRZ3	ABA |salt	Transgenic analysis of a salt-inhibited OsZFP1 gene from rice
LOC_Os06g05930	770.463	239.605	-1.684	2.816e-45	Chr6	2717971	2718471	501	*	6.41	6.97	5.5	1.47	0.00124	0.00814	Promoter (2-3kb)	9	2714450	2715133	684	2	LOC_Os06g05930.1	-2838	LOC_Os06g05930.1;LOC_Os06g05940.1	LOC_Os06g05930;LOC_Os06g05940	-2838;0	Os06g0152600	expressed protein
LOC_Os06g07790	197.637	47.359	-2.063	1.425e-21	Chr6	3783329	3783829	501	*	5.26	5.97	3.83	2.14	0.00379	0.0196	Intron (LOC_Os06g07790.1/LOC_Os06g07790, intron 4 of 6)	9	3779653	3785951	6299	1	LOC_Os06g07790.1	3676	LOC_Os06g07790.1	LOC_Os06g07790	0	Os06g0174800	retrotransposon protein, putative, unclassified, expressed
LOC_Os06g08120	141.932	62.882	-1.174	1.433e-06	Chr6	3941967	3942467	501	*	5.76	6.75	-0.14	6.89	2.05e-09	2.36e-07	Exon (LOC_Os06g08120.1/LOC_Os06g08120, exon 1 of 1)	9	3941687	3943447	1761	1	LOC_Os06g08120.1	280	LOC_Os06g08120.1	LOC_Os06g08120	0	Os06g0179500	plant protein of unknown function domain containing protein, expressed
LOC_Os06g08350	5.978	0.272	-4.208	0.02421	Chr6	4053848	4054348	501	*	5.43	6.29	2.98	3.31	0.00138	0.00883	Distal Intergenic	9	4051268	4052804	1537	1	LOC_Os06g08350.1	2580	LOC_Os06g08350.1	LOC_Os06g08350	0	Os06g0181800	expressed protein
LOC_Os06g08600	32.513	5.637	-2.513	1.948e-05	Chr6	4276538	4277038	501	*	6.71	7.19	5.98	1.21	0.00149	0.00942	Exon (LOC_Os06g08600.1/LOC_Os06g08600, exon 1 of 1)	9	4276289	4277140	852	1	LOC_Os06g08600.1	249	LOC_Os06g08600.1	LOC_Os06g08600	0	Os06g0185100	versicolorin reductase, putative, expressed
LOC_Os06g08830	1029.11	683.619	-0.592	1.807e-09	Chr6	4419653	4420153	501	*	6.11	7.04	2.81	4.22	1.33e-10	3.86e-08	Exon (LOC_Os06g08830.1/LOC_Os06g08830, exon 1 of 1)	9	4418692	4420382	1691	2	LOC_Os06g08830.1	229	LOC_Os06g08830.1	LOC_Os06g08830	0	Os06g0187500	UDP-glucoronosyl and UDP-glucosyl transferase, putative, expressed
LOC_Os06g10109	156.683	20.63	-2.927	3.474e-25	Chr6	5159969	5160469	501	*	5.37	6.2	3.23	2.97	0.0083	0.0354	Intron (LOC_Os06g10109.1/LOC_Os06g10109, intron 1 of 1)	9	5158179	5165171	6993	1	LOC_Os06g10109.1	1790	LOC_Os06g10109.1	LOC_Os06g10109	0	Os06g0202300	expressed protein
LOC_Os06g10170	53.842	25.471	-1.074	0.00613	Chr6	5209038	5209538	501	*	6.74	7.25	5.95	1.3	0.00238	0.0136	3' UTR	9	5208681	5212330	3650	2	LOC_Os06g10170.1	2792	LOC_Os06g10170.1;LOC_Os06g10170.2	LOC_Os06g10170;LOC_Os06g10170	0;0	Os06g0203200	flavin-containing monooxygenase family protein, putative, expressed
LOC_Os06g10170	53.842	25.471	-1.074	0.00613	Chr6	5211043	5211543	501	*	5.58	6.38	3.63	2.75	3.97e-06	6.03e-05	Exon (LOC_Os06g10170.1/LOC_Os06g10170, exon 2 of 5)	9	5208681	5212330	3650	2	LOC_Os06g10170.1	787	LOC_Os06g10170.1;LOC_Os06g10170.2;LOC_Os06g10180.1	LOC_Os06g10170;LOC_Os06g10170;LOC_Os06g10180	0;0;0	Os06g0203200	flavin-containing monooxygenase family protein, putative, expressed
LOC_Os06g10230	58.019	24.976	-1.218	0.001224	Chr6	5251200	5251700	501	*	5.83	6.59	4.13	2.46	1.22e-06	2.26e-05	5' UTR	9	5244239	5251843	7605	2	LOC_Os06g10230.1	143	LOC_Os06g10230.1;LOC_Os06g10240.1	LOC_Os06g10230;LOC_Os06g10240	0;0	Os06g0203800	receptor-like protein kinase 5 precursor, putative, expressed	OsER1	growth|panicle|cell proliferation|panicle size|plant stature	Phylogenetic and CRISPR/Cas9 Studies in Deciphering the Evolutionary Trajectory and Phenotypic Impacts of Rice ERECTA Genes.
LOC_Os06g10480	102.016	59.371	-0.78	0.006071	Chr6	5398864	5399364	501	*	6.06	6.78	4.6	2.17	4.49e-05	0.000493	Intron (LOC_Os06g10480.1/LOC_Os06g10480, intron 8 of 21)	9	5393251	5406651	13401	1	LOC_Os06g10480.1	5613	LOC_Os06g10480.1	LOC_Os06g10480	0	Os06g0206700	expressed protein
LOC_Os06g10670	36.647	6.46	-2.482	9.271e-06	Chr6	5567452	5567952	501	*	5.18	5.99	3.2	2.79	5.62e-05	0.000598	Promoter (1-2kb)	9	5569910	5571471	1562	1	LOC_Os06g10670.1	-1958	LOC_Os06g10670.1	LOC_Os06g10670	0	Os06g0209100	aspartic proteinase nepenthesin-1 precursor, putative, expressed
LOC_Os06g10750	89.677	52.182	-0.778	0.01139	Chr6	5613776	5614276	501	*	6.25	6.85	5.2	1.66	0.000405	0.00326	Promoter (<=1kb)	9	5613999	5617153	3155	1	LOC_Os06g10750.1	0	LOC_Os06g10740.1;LOC_Os06g10750.1	LOC_Os06g10740;LOC_Os06g10750	0;0	Os06g0210000	integral membrane protein DUF6 containing protein, expressed
LOC_Os06g10910	8.835	0.63	-3.854	0.01414	Chr6	5703976	5704476	501	*	6.66	7.17	5.87	1.3	0.00927	0.0384	Exon (LOC_Os06g10910.1/LOC_Os06g10910, exon 2 of 2)	9	5701639	5704991	3353	1	LOC_Os06g10910.1	2337	LOC_Os06g10910.1;LOC_Os06g10920.1	LOC_Os06g10910;LOC_Os06g10920	0;0	Os06g0211600	xyloglucan fucosyltransferase, putative, expressed
LOC_Os06g11135	787.929	491.201	-0.683	7.307e-11	Chr6	5837869	5838369	501	*	6.18	6.81	5.02	1.8	0.00098	0.00674	Exon (LOC_Os06g11135.1/LOC_Os06g11135, exon 1 of 1)	9	5837564	5838523	960	2	LOC_Os06g11135.1	154	LOC_Os06g11130.1;LOC_Os06g11135.1;LOC_Os06g11140.1	LOC_Os06g11130;LOC_Os06g11135;LOC_Os06g11140	0;0;6181	Os06g0214850	gibberellin receptor GID1L2, putative, expressed
LOC_Os06g11320	117.375	76.789	-0.615	0.02807	Chr6	5941125	5941625	501	*	5.83	6.6	4.08	2.52	7.37e-07	1.48e-05	Promoter (1-2kb)	9	5933788	5939645	5858	2	LOC_Os06g11320.1	-1480	LOC_Os06g11320.1;LOC_Os06g11320.2	LOC_Os06g11320;LOC_Os06g11320	0;0	Os06g0216800	peptidyl-prolyl cis-trans isomerase CYP40, putative, expressed
LOC_Os06g11490	267.9	7.656	-5.142	2.155e-51	Chr6	6086575	6087075	501	*	5.71	6.4	4.3	2.1	0.00131	0.0085	Promoter (<=1kb)	9	6086798	6088248	1451	1	LOC_Os06g11490.1	0	LOC_Os06g11490.1;LOC_Os06g11500.1	LOC_Os06g11490;LOC_Os06g11500	0;0	Os06g0218600	plastocyanin-like domain containing protein, putative, expressed
LOC_Os06g11600	71.18	39.63	-0.861	0.01562	Chr6	6146506	6147006	501	*	4.81	5.79	-0.14	5.93	2.76e-06	4.43e-05	Promoter (<=1kb)	9	6146721	6150348	3628	1	LOC_Os06g11600.2	0	LOC_Os06g11590.1;LOC_Os06g11600.2;LOC_Os06g11600.3	LOC_Os06g11590;LOC_Os06g11600;LOC_Os06g11600	0;0;0	Os06g0219400	growth regulator related protein, putative, expressed
LOC_Os06g12210	34.497	7.798	-2.146	7.671e-05	Chr6	6549023	6549523	501	*	6.92	7.36	6.29	1.06	0.000668	0.00493	Distal Intergenic	9	6556802	6557319	518	1	LOC_Os06g12210.1	-7279				Os06g0226500	helix-loop-helix DNA-binding domain containing protein, expressed	BU1|OsbHLH174	BR signaling|grain|brassinosteroid|grain size| BR |lamina|erect	BRASSINOSTEROID UPREGULATED1, encoding a helix-loop-helix protein, is a novel gene involved in brassinosteroid signaling and controls bending of the lamina joint in rice|H3K36 methylation is critical for brassinosteroid-regulated plant growth and development in rice
LOC_Os06g12539	550.832	338.1	-0.699	1.985e-07	Chr6	6796798	6797298	501	*	7.03	7.54	6.21	1.33	0.000336	0.00278	3' UTR	9	6796598	6798469	1872	1	LOC_Os06g12539.1	200	LOC_Os06g12530.1;LOC_Os06g12539.1	LOC_Os06g12530;LOC_Os06g12539	2648;0	Os06g0231350	expressed protein
LOC_Os06g13000	317.572	206.397	-0.622	3.979e-05	Chr6	7122717	7123217	501	*	5.43	6.39	1.34	5.05	6.52e-09	4.93e-07	Promoter (<=1kb)	9	7121120	7123026	1907	2	LOC_Os06g13000.1	0	LOC_Os06g12990.1;LOC_Os06g13000.1;LOC_Os06g13010.1	LOC_Os06g12990;LOC_Os06g13000;LOC_Os06g13010	3888;0;-2449	Os06g0237000	ankyrin repeat domain-containing protein, chloroplast precursor, putative, expressed
LOC_Os06g13830	23.628	7.093	-1.746	0.0121	Chr6	7671686	7672186	501	*	6.27	6.85	5.26	1.59	0.00147	0.0093	Exon (LOC_Os06g13830.1/LOC_Os06g13830, exon 5 of 5)	9	7671255	7674778	3524	2	LOC_Os06g13830.1	2592	LOC_Os06g13820.2;LOC_Os06g13820.1;LOC_Os06g13830.1	LOC_Os06g13820;LOC_Os06g13820;LOC_Os06g13830	0;0;0	Os06g0247900	endoglucanase, putative, expressed
LOC_Os06g13830	23.628	7.093	-1.746	0.0121	Chr6	7673134	7673634	501	*	5.08	6.06	-0.14	6.2	3.64e-07	8.55e-06	5' UTR	9	7671255	7674778	3524	2	LOC_Os06g13830.1	1144	LOC_Os06g13830.1	LOC_Os06g13830	0	Os06g0247900	endoglucanase, putative, expressed
LOC_Os06g13870	136.869	57.537	-1.244	1.819e-07	Chr6	7709832	7710332	501	*	5.46	6.19	3.91	2.28	0.0105	0.0419	Exon (LOC_Os06g13870.1/LOC_Os06g13870, exon 1 of 1)	9	7709065	7710506	1442	1	LOC_Os06g13870.1	767	LOC_Os06g13870.1	LOC_Os06g13870	0	Os06g0248500	U-box protein CMPG1, putative, expressed
LOC_Os06g14324	2854.49	1825.48	-0.646	1.622e-18	Chr6	7990550	7991050	501	*	4.99	5.75	3.31	2.44	0.00249	0.0141	Promoter (<=1kb)	9	7983955	7990958	7004	2	LOC_Os06g14324.1	0	LOC_Os06g14324.2;LOC_Os06g14324.1;LOC_Os06g14340.1	LOC_Os06g14324;LOC_Os06g14324;LOC_Os06g14340	0;0;0	Os06g0254300	caleosin related protein, putative, expressed
LOC_Os06g15680	238.403	144.592	-0.717	3.23e-05	Chr6	8876188	8876688	501	*	6.38	6.89	5.6	1.29	0.00071	0.00519	Exon (LOC_Os06g15680.1/LOC_Os06g15680, exon 2 of 2)	9	8876051	8877757	1707	2	LOC_Os06g15680.1	1069	LOC_Os06g15670.1;LOC_Os06g15680.1	LOC_Os06g15670;LOC_Os06g15680	3704;0	Os06g0267400	cytochrome P450 71A6, putative, expressed
LOC_Os06g15910	153.373	71.552	-1.107	1.68e-06	Chr6	9043592	9044092	501	*	6.03	6.51	5.31	1.19	0.00537	0.0255	Distal Intergenic	9	9033862	9037775	3914	2	LOC_Os06g15910.1	-5817				Os06g0270200	potassium transporter, putative, expressed
LOC_Os06g16420	1443.62	938.221	-0.621	4.839e-15	Chr6	9384631	9385131	501	*	5.92	6.87	1.97	4.9	3.64e-10	7.53e-08	Distal Intergenic	9	9396130	9399130	3001	1	LOC_Os06g16420.1	-10999				Os06g0275800	amino acid transporter, putative, expressed
LOC_Os06g18670	1974.23	249.298	-2.985	4.403e-240	Chr6	10589109	10589609	501	*	6.67	7.43	4.93	2.5	3.88e-05	0.000436	Exon (LOC_Os06g18670.1/LOC_Os06g18670, exon 1 of 1)	9	10588145	10589939	1795	2	LOC_Os06g18670.1	330	LOC_Os06g18670.1	LOC_Os06g18670	0	Os06g0289900	anthocyanidin 3-O-glucosyltransferase, putative, expressed
LOC_Os06g19070	701.443	442.604	-0.665	1.931e-09	Chr6	10844950	10845450	501	*	6.07	6.76	4.69	2.07	0.00296	0.0162	Exon (LOC_Os06g19070.1/LOC_Os06g19070, exon 1 of 2)	9	10843920	10846020	2101	2	LOC_Os06g19070.1	570	LOC_Os06g19070.1	LOC_Os06g19070	0	Os06g0294600	cytochrome P450, putative, expressed
LOC_Os06g21410	101.542	44.755	-1.182	9.206e-05	Chr6	12362884	12363384	501	*	6.12	6.65	5.27	1.38	0.00291	0.0159	Distal Intergenic	9	12366594	12368160	1567	1	LOC_Os06g21410.1	-3210				Os06g0319133	arabinogalactan peptide 23 precursor, putative, expressed	OSIAGP	growth|seedling|pollen|cell elongation|inflorescence|root|shoot	Characterization of a pollen-preferential gene OSIAGP from rice (Oryza sativa L. subspecies indica) coding for an arabinogalactan protein homologue, and analysis of its promoter activity during pollen development and pollen tube growth
LOC_Os06g21410	101.542	44.755	-1.182	9.206e-05	Chr6	12360492	12360992	501	*	6	6.59	5	1.59	0.00345	0.0182	Distal Intergenic	9	12366594	12368160	1567	1	LOC_Os06g21410.1	-5602	LOC_Os06g21390.1;LOC_Os06g21390.4;LOC_Os06g21390.3	LOC_Os06g21390;LOC_Os06g21390;LOC_Os06g21390	0;0;0	Os06g0319133	arabinogalactan peptide 23 precursor, putative, expressed	OSIAGP	growth|seedling|pollen|cell elongation|inflorescence|root|shoot	Characterization of a pollen-preferential gene OSIAGP from rice (Oryza sativa L. subspecies indica) coding for an arabinogalactan protein homologue, and analysis of its promoter activity during pollen development and pollen tube growth
LOC_Os06g21410	101.542	44.755	-1.182	9.206e-05	Chr6	12359628	12360128	501	*	5.04	6	0.93	5.07	1.89e-06	3.25e-05	Distal Intergenic	9	12366594	12368160	1567	1	LOC_Os06g21410.1	-6466	LOC_Os06g21390.2;LOC_Os06g21390.1;LOC_Os06g21390.4;LOC_Os06g21390.3	LOC_Os06g21390;LOC_Os06g21390;LOC_Os06g21390;LOC_Os06g21390	0;0;0;0	Os06g0319133	arabinogalactan peptide 23 precursor, putative, expressed	OSIAGP	growth|seedling|pollen|cell elongation|inflorescence|root|shoot	Characterization of a pollen-preferential gene OSIAGP from rice (Oryza sativa L. subspecies indica) coding for an arabinogalactan protein homologue, and analysis of its promoter activity during pollen development and pollen tube growth
LOC_Os06g21530	682.983	427.011	-0.679	4.769e-09	Chr6	12426265	12426765	501	*	6.05	6.9	3.69	3.21	0.00138	0.00884	Promoter (<=1kb)	9	12426184	12426831	648	2	LOC_Os06g21530.1	66	LOC_Os06g21516.1;LOC_Os06g21530.1	LOC_Os06g21516;LOC_Os06g21530	-772;0	Os06g0319800	expressed protein
LOC_Os06g22290	7.939	0	-5.558	0.001076	Chr6	12933273	12933773	501	*	6.53	7.01	5.82	1.19	0.00477	0.0234	Exon (LOC_Os06g22290.1/LOC_Os06g22290, exon 2 of 2)	9	12931779	12934695	2917	1	LOC_Os06g22290.1	1494	LOC_Os06g22290.1	LOC_Os06g22290	0	Os06g0328400	legume lectins beta domain containing protein, expressed
LOC_Os06g24040	283.698	34.317	-3.047	1.55e-49	Chr6	14042990	14043490	501	*	6.7	7.27	5.74	1.54	0.00145	0.00921	Promoter (2-3kb)	9	14046149	14046819	671	1	LOC_Os06g24040.1	-2659	LOC_Os06g24040.1	LOC_Os06g24040	0	None	expressed protein
LOC_Os06g28630	1168.14	238.916	-2.293	1.383e-87	Chr6	16292399	16292899	501	*	5.7	6.45	4.05	2.4	1.73e-05	0.000216	Distal Intergenic	9	16302034	16305078	3045	1	LOC_Os06g28630.1	-9135				Os06g0480500	expressed protein
LOC_Os06g28820	89.432	42.03	-1.085	0.001222	Chr6	16424703	16425203	501	*	4.57	5.55	-0.14	5.69	9.44e-06	0.000127	Intron (LOC_Os06g28820.1/LOC_Os06g28820, intron 1 of 12)	9	16400699	16432410	31712	2	LOC_Os06g28820.1	7207	LOC_Os06g28820.1	LOC_Os06g28820	0	Os06g0483200	cycloartenol synthase, putative, expressed
LOC_Os06g35160	620.107	355.563	-0.803	1.072e-13	Chr6	20490926	20491426	501	*	6.03	6.56	5.19	1.37	0.00543	0.0257	Exon (LOC_Os06g35160.1/LOC_Os06g35160, exon 1 of 1)	9	20490195	20492274	2080	2	LOC_Os06g35160.1	848	LOC_Os06g35160.1	LOC_Os06g35160	0	Os06g0543400	CAMK_KIN1/SNF1/Nim1_like.26 - CAMK includes calcium/calmodulin depedent protein kinases, expressed
LOC_Os06g35410	286.079	136.288	-1.072	5.72e-11	Chr6	20635921	20636421	501	*	6.87	7.4	6.01	1.38	0.00888	0.0372	Exon (LOC_Os06g35410.1/LOC_Os06g35410, exon 8 of 10)	9	20635347	20639704	4358	2	LOC_Os06g35410.1	3283	LOC_Os06g35410.1	LOC_Os06g35410	0	Os06g0545900	growth regulator related protein, putative, expressed
LOC_Os06g36040	96.6	59.587	-0.7	0.01141	Chr6	21063242	21063742	501	*	6.27	6.88	5.2	1.68	0.000513	0.00395	Exon (LOC_Os06g36040.1/LOC_Os06g36040, exon 1 of 1)	9	21063302	21063943	642	2	LOC_Os06g36040.1	201	LOC_Os06g36030.1;LOC_Os06g36040.1;LOC_Os06g36050.1	LOC_Os06g36030;LOC_Os06g36040;LOC_Os06g36050	0;0;0	Os06g0554200	expressed protein
LOC_Os06g36480	74.397	28.737	-1.38	4.101e-05	Chr6	21421365	21421865	501	*	5.69	6.3	4.59	1.71	0.00345	0.0182	5' UTR	9	21414174	21421990	7817	2	LOC_Os06g36480.1	125	LOC_Os06g36480.1	LOC_Os06g36480	0	Os06g0560300	no apical meristem protein, putative, expressed
LOC_Os06g37490	71.445	33.965	-1.072	0.0009567	Chr6	22187029	22187529	501	*	6.91	7.34	6.3	1.05	0.00668	0.0301	Distal Intergenic	9	22183476	22183721	246	2	LOC_Os06g37490.1	-3308				None	expressed protein
LOC_Os06g38960	165.033	54.639	-1.598	8.309e-13	Chr6	23117287	23117787	501	*	5.25	6.23	-0.14	6.37	1.64e-07	4.7e-06	Promoter (1-2kb)	9	23119058	23122451	3394	1	LOC_Os06g38960.1	-1271	LOC_Os06g38960.1;LOC_Os06g38960.2	LOC_Os06g38960;LOC_Os06g38960	-1271;-1272	Os06g0589500	expressed protein
LOC_Os06g39390	77.666	2.656	-4.843	3.645e-16	Chr6	23380844	23381344	501	*	6.24	6.91	4.95	1.96	0.00683	0.0306	Promoter (<=1kb)	9	23379156	23381415	2260	2	LOC_Os06g39390.1	71	LOC_Os06g39390.1;LOC_Os06g39400.1	LOC_Os06g39390;LOC_Os06g39400	0;7043	Os06g0594600	transferase family protein, putative, expressed	OsAt10	leaf|yield|vegetative|biomass|cell wall	Overexpression of a BAHD acyltransferase, OsAt10, alters rice cell wall hydroxycinnamic acid content and saccharification|Overexpression of a rice BAHD acyltransferase gene in switchgrass (Panicum virgatum L.) enhances saccharification.
LOC_Os06g39880	39.334	16.22	-1.277	0.006378	Chr6	23701884	23702384	501	*	5.64	6.25	4.58	1.66	0.00391	0.0201	Promoter (2-3kb)	9	23704714	23707248	2535	1	LOC_Os06g39880.1	-2330	LOC_Os06g39880.1	LOC_Os06g39880	-2330	Os06g0600400	cytochrome P450 72A1, putative, expressed	CYP734A4	BR catabolism	Genome-Wide Study of KNOX Regulatory Network Reveals Brassinosteroid Catabolic Genes Important for Shoot Meristem Function in Rice
LOC_Os06g40170	238.09	64.958	-1.876	1.286e-15	Chr6	23909125	23909625	501	*	5.22	6.2	-0.14	6.34	2.72e-07	6.88e-06	3' UTR	9	23908918	23913797	4880	2	LOC_Os06g40170.1	4172	LOC_Os06g40170.1	LOC_Os06g40170	0	Os06g0604200	phospholipase D, putative, expressed	OsPLDalpha4
LOC_Os06g40190	448.126	260.936	-0.781	1.412e-09	Chr6	23926673	23927173	501	*	5.87	6.45	4.9	1.55	0.00112	0.0075	Promoter (1-2kb)	9	23928702	23932372	3671	1	LOC_Os06g40190.1	-1529	LOC_Os06g40180.1;LOC_Os06g40190.1	LOC_Os06g40180;LOC_Os06g40190	0;0	Os06g0604400	phospholipase D, putative, expressed
LOC_Os06g40190	448.126	260.936	-0.781	1.412e-09	Chr6	23931330	23931830	501	*	4.3	5.27	-0.14	5.41	6.64e-05	0.000691	3' UTR	9	23928702	23932372	3671	1	LOC_Os06g40190.1	2628	LOC_Os06g40190.1	LOC_Os06g40190	0	Os06g0604400	phospholipase D, putative, expressed
LOC_Os06g40850	81.455	29.528	-1.461	8.519e-06	Chr6	24365238	24365738	501	*	5.42	6.4	-0.14	6.54	2.89e-08	1.35e-06	Exon (LOC_Os06g40850.1/LOC_Os06g40850, exon 2 of 5)	9	24363116	24366495	3380	2	LOC_Os06g40850.1	757	LOC_Os06g40840.1;LOC_Os06g40850.1	LOC_Os06g40840;LOC_Os06g40850	0;0	Os06g0611050	IQ calmodulin-binding motif family protein, putative, expressed
LOC_Os06g40850	81.455	29.528	-1.461	8.519e-06	Chr6	24364264	24364764	501	*	5.39	6.37	-0.14	6.51	7.39e-08	2.64e-06	Exon (LOC_Os06g40850.1/LOC_Os06g40850, exon 4 of 5)	9	24363116	24366495	3380	2	LOC_Os06g40850.1	1731	LOC_Os06g40840.1;LOC_Os06g40850.1	LOC_Os06g40840;LOC_Os06g40850	0;0	Os06g0611050	IQ calmodulin-binding motif family protein, putative, expressed
LOC_Os06g41020	245.208	132.486	-0.885	4.153e-07	Chr6	24500505	24501005	501	*	5.54	6.35	3.45	2.91	0.00763	0.0332	Promoter (<=1kb)	9	24495060	24500971	5912	2	LOC_Os06g41020.1	0	LOC_Os06g41020.1;LOC_Os06g41030.1	LOC_Os06g41020;LOC_Os06g41030	0;0	Os06g0612900	DUF1680 domain containing protein, putative, expressed
LOC_Os06g41910	23.133	4.41	-2.357	0.001539	Chr6	25146426	25146926	501	*	5.5	6.37	3.04	3.32	0.0012	0.00795	Exon (LOC_Os06g41910.1/LOC_Os06g41910, exon 1 of 2)	9	25145626	25148023	2398	1	LOC_Os06g41910.1	800	LOC_Os06g41910.1	LOC_Os06g41910	0	Os06g0624700	expressed protein
LOC_Os06g42164	25.253	10.357	-1.281	0.04467	Chr6	25315649	25316149	501	*	5.21	6.19	-0.14	6.33	1.44e-07	4.29e-06	Promoter (<=1kb)	9	25315703	25316474	772	1	LOC_Os06g42164.1	0	LOC_Os06g42164.1;LOC_Os06g42170.1	LOC_Os06g42164;LOC_Os06g42170	0;-1460	Os06g0627100	expressed protein
LOC_Os06g42560	1130.43	629.348	-0.844	3.773e-23	Chr6	25593945	25594445	501	*	5.5	6.28	3.68	2.59	0.000507	0.00392	Promoter (<=1kb)	9	25590233	25594488	4256	2	LOC_Os06g42560.1	43	LOC_Os06g42560.1;LOC_Os06g42560.2;LOC_Os06g42560.3;LOC_Os06g42560.4	LOC_Os06g42560;LOC_Os06g42560;LOC_Os06g42560;LOC_Os06g42560	0;0;0;0	Os06g0632200	tryptophan synthase beta chain 2, putative, expressed
LOC_Os06g43130	446.856	297.274	-0.587	6.789e-06	Chr6	25930211	25930711	501	*	5.11	6.02	1.97	4.06	6.89e-05	0.000713	Promoter (<=1kb)	9	25928014	25930634	2621	2	LOC_Os06g43130.1	0	LOC_Os06g43130.1;LOC_Os06g43140.1	LOC_Os06g43130;LOC_Os06g43140	0;0	Os06g0638100	tic21, putative, expressed
LOC_Os06g43170	247.973	137.686	-0.846	1.035e-06	Chr6	25946390	25946890	501	*	6.49	7.12	5.33	1.8	0.00115	0.00768	3' UTR	9	25945635	25949545	3911	2	LOC_Os06g43170.1	2655	LOC_Os06g43160.1;LOC_Os06g43170.1	LOC_Os06g43160;LOC_Os06g43170	4750;0	Os06g0638500	transposon protein, putative, unclassified, expressed
LOC_Os06g43170	247.973	137.686	-0.846	1.035e-06	Chr6	25949938	25950438	501	*	5.37	6.35	-0.14	6.49	5.56e-08	2.15e-06	Promoter (<=1kb)	9	25945635	25949545	3911	2	LOC_Os06g43170.1	-393	LOC_Os06g43170.1	LOC_Os06g43170	0	Os06g0638500	transposon protein, putative, unclassified, expressed
LOC_Os06g43170	247.973	137.686	-0.846	1.035e-06	Chr6	25948168	25949125	958	*	6.74	7.27	5.88	1.39	0.00362	0.0189	Exon (LOC_Os06g43170.1/LOC_Os06g43170, exon 1 of 2)	9	25945635	25949545	3911	2	LOC_Os06g43170.1	420	LOC_Os06g43170.1	LOC_Os06g43170	0	Os06g0638500	transposon protein, putative, unclassified, expressed
LOC_Os06g43370	462.689	261.451	-0.823	1.559e-09	Chr6	26073299	26073799	501	*	6.73	7.21	6.01	1.2	0.00554	0.0261	Exon (LOC_Os06g43370.1/LOC_Os06g43370, exon 2 of 2)	9	26072378	26074146	1769	1	LOC_Os06g43370.1	921	LOC_Os06g43370.1	LOC_Os06g43370	0	Os06g0640800	cytochrome P450, putative, expressed
LOC_Os06g43370	462.689	261.451	-0.823	1.559e-09	Chr6	26070994	26071494	501	*	6.2	6.63	5.58	1.05	0.0128	0.0485	Promoter (<=1kb)	9	26072378	26074146	1769	1	LOC_Os06g43370.1	-884	LOC_Os06g43360.1;LOC_Os06g43370.1	LOC_Os06g43360;LOC_Os06g43370	0;0	Os06g0640800	cytochrome P450, putative, expressed
LOC_Os06g43384	46.815	23.11	-1.019	0.0168	Chr6	26080746	26081246	501	*	6.29	7.07	4.51	2.56	4.99e-08	1.98e-06	Promoter (1-2kb)	9	26082406	26087091	4686	1	LOC_Os06g43384.1	-1160	LOC_Os06g43384.1	LOC_Os06g43384	0	Os06g0641200	cytochrome P450, putative, expressed
LOC_Os06g43620	270.694	134.125	-1.017	8.862e-08	Chr6	26235492	26235992	501	*	6.15	7.04	3.45	3.59	0.000125	0.0012	Exon (LOC_Os06g43620.1/LOC_Os06g43620, exon 4 of 4)	9	26234932	26238270	3339	2	LOC_Os06g43620.1	2278	LOC_Os06g43610.1;LOC_Os06g43620.1	LOC_Os06g43610;LOC_Os06g43620	0;0	Os06g0643700	haemolysin-III, putative, expressed
LOC_Os06g44540	64.337	26.805	-1.259	0.000572	Chr6	26900994	26901958	965	*	6.63	7.18	5.71	1.47	0.000118	0.00114	Promoter (2-3kb)	9	26904391	26908175	3785	1	LOC_Os06g44540.1	-2433	LOC_Os06g44540.1	LOC_Os06g44540	0	Os06g0656000	HOTHEAD precursor, putative, expressed
LOC_Os06g45184	15.767	2.281	-2.894	0.001697	Chr6	27322426	27322926	501	*	6.17	6.86	4.83	2.03	1.43e-05	0.000183	Promoter (<=1kb)	9	27319471	27322662	3192	2	LOC_Os06g45184.1	0	LOC_Os06g45184.1;LOC_Os06g45184.2;LOC_Os06g45184.3;LOC_Os06g45184.4;LOC_Os06g45184.5;LOC_Os06g45190.1	LOC_Os06g45184;LOC_Os06g45184;LOC_Os06g45184;LOC_Os06g45184;LOC_Os06g45184;LOC_Os06g45190	0;0;0;0;0;1485	Os06g0662550	retrotransposon protein, putative, Ty3-gypsy subclass, expressed
LOC_Os06g45950	21.885	6.243	-1.805	0.007529	Chr6	27827920	27828420	501	*	6.02	6.59	5.07	1.52	0.00154	0.00967	Downstream (1-2kb)	9	27830246	27831317	1072	2	LOC_Os06g45950.1	2897	LOC_Os06g45940.1;LOC_Os06g45940.2;LOC_Os06g45950.1	LOC_Os06g45940;LOC_Os06g45940;LOC_Os06g45950	0;0;0	Os06g0671150	OsSAUR25 - Auxin-responsive SAUR gene family member, expressed
LOC_Os06g45990	145.376	80.853	-0.847	0.0001758	Chr6	27876879	27877379	501	*	4.86	5.84	-0.14	5.98	1.52e-06	2.71e-05	3' UTR	9	27875114	27878503	3390	1	LOC_Os06g45990.1	1765	LOC_Os06g45980.1;LOC_Os06g45990.2;LOC_Os06g45990.1;LOC_Os06g46000.1	LOC_Os06g45980;LOC_Os06g45990;LOC_Os06g45990;LOC_Os06g46000	10138;0;0;2766	Os06g0671800	patellin-5, putative, expressed
LOC_Os06g46284	923.912	491.529	-0.911	6.323e-22	Chr6	28045980	28046480	501	*	5.92	6.4	5.19	1.21	0.0119	0.046	Exon (LOC_Os06g46284.1/LOC_Os06g46284, exon 5 of 5)	9	28045147	28054331	9185	2	LOC_Os06g46284.1	7851	LOC_Os06g46284.1;LOC_Os06g46284.2	LOC_Os06g46284;LOC_Os06g46284	0;0	Os06g0675700	glycosyl hydrolase, family 31, putative, expressed
LOC_Os06g46500	41.124	20.606	-0.996	0.0393	Chr6	28240370	28240870	501	*	6.57	7.17	5.52	1.65	4.74e-05	0.000518	Promoter (1-2kb)	9	28234421	28238461	4041	2	LOC_Os06g46500.1	-1909	LOC_Os06g46500.1;LOC_Os06g46510.1	LOC_Os06g46500;LOC_Os06g46510	-1909;-2307	Os06g0678800	monocopper oxidase, putative, expressed
LOC_Os06g46799	3895.49	2180.05	-0.837	1.337e-43	Chr6	28414211	28414711	501	*	5.74	6.62	3.07	3.55	0.000268	0.0023	Exon (LOC_Os06g46799.1/LOC_Os06g46799, exon 1 of 4)	9	28414030	28425514	11485	1	LOC_Os06g46799.1	181	LOC_Os06g46799.1	LOC_Os06g46799	0	Os06g0681600	peroxidase precursor, putative, expressed
LOC_Os06g47820	84.85	54.372	-0.643	0.03838	Chr6	28941781	28942281	501	*	5.43	6.26	3.23	3.02	0.00532	0.0254	Exon (LOC_Os06g47820.1/LOC_Os06g47820, exon 1 of 6)	9	28941271	28943704	2434	1	LOC_Os06g47820.1	510	LOC_Os06g47810.1;LOC_Os06g47820.1	LOC_Os06g47810;LOC_Os06g47820	-2324;0	Os06g0693200	protein kinase domain containing protein, expressed	OsRRK1	leaf|development|defense|insect|breeding|erect	Overexpression of OsRRK1 Changes Leaf Morphology and Defense to Insect in Rice.
LOC_Os06g47820	84.85	54.372	-0.643	0.03838	Chr6	28942738	28943238	501	*	5.72	6.39	4.45	1.94	0.000275	0.00235	Exon (LOC_Os06g47820.1/LOC_Os06g47820, exon 4 of 6)	9	28941271	28943704	2434	1	LOC_Os06g47820.1	1467	LOC_Os06g47820.1	LOC_Os06g47820	0	Os06g0693200	protein kinase domain containing protein, expressed	OsRRK1	leaf|development|defense|insect|breeding|erect	Overexpression of OsRRK1 Changes Leaf Morphology and Defense to Insect in Rice.
LOC_Os06g48180	714.599	435.538	-0.715	1.863e-10	Chr6	29144814	29145314	501	*	6.85	7.41	5.92	1.49	0.00129	0.00838	Promoter (<=1kb)	9	29144888	29146562	1675	1	LOC_Os06g48180.1	0	LOC_Os06g48180.1;LOC_Os06g48180.2;LOC_Os06g48190.1	LOC_Os06g48180;LOC_Os06g48180;LOC_Os06g48190	0;0;-2065	Os06g0696600	glycosyl hydrolases family 16, putative, expressed
LOC_Os06g48320	99.293	58.038	-0.773	0.004939	Chr6	29223016	29223516	501	*	5.53	6.11	4.55	1.56	0.00589	0.0274	Distal Intergenic	9	29217410	29219166	1757	2	LOC_Os06g48320.2	-3850				Os06g0698500	EDR2, putative, expressed
LOC_Os06g48850	10.948	0.882	-3.594	0.006058	Chr6	29577919	29578419	501	*	5.79	6.49	4.38	2.11	0.000754	0.00545	Promoter (<=1kb)	9	29577974	29578378	405	1	LOC_Os06g48850.1	0	LOC_Os06g48850.1;LOC_Os06g48860.1	LOC_Os06g48850;LOC_Os06g48860	0;2479	Os06g0701900	OsSAUR27 - Auxin-responsive SAUR gene family member, expressed
LOC_Os06g49170	5.974	0	-5.122	0.00748	Chr6	29794497	29794997	501	*	7.22	7.7	6.51	1.2	0.00605	0.0279	Exon (LOC_Os06g49170.1/LOC_Os06g49170, exon 1 of 3)	9	29791163	29795253	4091	2	LOC_Os06g49170.1	256	LOC_Os06g49170.1	LOC_Os06g49170	0	Os06g0705200	OsWAK64 - OsWAK receptor-like protein kinase, expressed
LOC_Os06g49880	244.317	129.509	-0.917	7.216e-08	Chr6	30196373	30196873	501	*	6.96	7.41	6.32	1.09	0.00645	0.0293	Exon (LOC_Os06g49880.1/LOC_Os06g49880, exon 1 of 2)	9	30196097	30197605	1509	1	LOC_Os06g49880.2	276	LOC_Os06g49880.1;LOC_Os06g49880.2	LOC_Os06g49880;LOC_Os06g49880	0;0	Os06g0713000	B-box zinc finger family protein, putative, expressed
LOC_Os06g50390	169.754	106.282	-0.675	0.001047	Chr6	30509506	30510006	501	*	6.37	7.04	5.08	1.96	0.00162	0.01	Promoter (<=1kb)	9	30509418	30512323	2906	1	LOC_Os06g50390.1	88	LOC_Os06g50390.1	LOC_Os06g50390	0	Os06g0717900	eukaryotic aspartyl protease domain containing protein, expressed
LOC_Os06g51200	74.987	21.785	-1.786	3.566e-07	Chr6	30971482	30971982	501	*	4.45	5.42	-0.14	5.56	2.18e-05	0.000265	Intron (LOC_Os06g51190.1/LOC_Os06g51190, intron 9 of 9)	9	30976066	30981070	5005	1	LOC_Os06g51200.1	-4084	LOC_Os06g51190.1	LOC_Os06g51190	0	Os06g0727800	lysine ketoglutarate reductase trans-splicing related 1, putative, expressed
LOC_Os07g01310	340.544	225.855	-0.589	8.693e-05	Chr7	191398	191898	501	*	4.73	5.61	2.14	3.47	0.00105	0.00714	5' UTR	10	191044	197084	6041	1	LOC_Os07g01310.1	354	LOC_Os07g01310.1	LOC_Os07g01310	0	Os07g0103100	glutamate receptor, putative, expressed
LOC_Os07g01520	18.731	6.978	-1.419	0.04586	Chr7	327060	327560	501	*	6.92	7.48	5.97	1.51	0.00274	0.0152	Exon (LOC_Os07g01520.1/LOC_Os07g01520, exon 1 of 1)	10	326737	329301	2565	1	LOC_Os07g01520.1	323	LOC_Os07g01520.1	LOC_Os07g01520	0	Os07g0105800	expressed protein
LOC_Os07g01600	684.617	190.881	-1.842	2.828e-57	Chr7	373141	373641	501	*	5.6	6.48	2.95	3.53	1.64e-05	0.000206	Promoter (<=1kb)	10	373732	375712	1981	1	LOC_Os07g01600.1	-91	LOC_Os07g01600.1;LOC_Os07g01610.1	LOC_Os07g01600;LOC_Os07g01610	0;4675	Os07g0106700	dirigent, putative, expressed
LOC_Os07g01600	684.617	190.881	-1.842	2.828e-57	Chr7	374001	374501	501	*	6.54	7.03	5.81	1.22	0.00628	0.0287	3' UTR	10	373732	375712	1981	1	LOC_Os07g01600.1	269	LOC_Os07g01600.1;LOC_Os07g01610.1	LOC_Os07g01600;LOC_Os07g01610	0;3815	Os07g0106700	dirigent, putative, expressed
LOC_Os07g02100	952.641	624.572	-0.61	1.011e-09	Chr7	665189	665689	501	*	5.79	6.6	3.8	2.8	0.0113	0.0443	Exon (LOC_Os07g02100.2/LOC_Os07g02100, exon 1 of 1)	10	664612	667146	2535	1	LOC_Os07g02100.1	577	LOC_Os07g02090.1;LOC_Os07g02100.2;LOC_Os07g02100.1;LOC_Os07g02110.1	LOC_Os07g02090;LOC_Os07g02100;LOC_Os07g02100;LOC_Os07g02110	6416;0;0;-2055	Os07g0111700	flavin-containing monooxygenase family protein, putative, expressed
LOC_Os07g02360	86.678	46.114	-0.898	0.005655	Chr7	809543	810043	501	*	5.72	6.5	3.86	2.64	2.57e-06	4.2e-05	Promoter (<=1kb)	10	809697	812714	3018	1	LOC_Os07g02360.1	0	LOC_Os07g02360.1	LOC_Os07g02360	0	Os07g0114500	expressed protein
LOC_Os07g02360	86.678	46.114	-0.898	0.005655	Chr7	807764	808264	501	*	5.63	6.37	4.06	2.31	0.000162	0.0015	Promoter (1-2kb)	10	809697	812714	3018	1	LOC_Os07g02360.1	-1433	LOC_Os07g02350.1;LOC_Os07g02360.1	LOC_Os07g02350;LOC_Os07g02360	-2577;0	Os07g0114500	expressed protein
LOC_Os07g04180	3310.22	1990.58	-0.734	2.233e-27	Chr7	1794174	1794674	501	*	5.98	6.73	4.33	2.4	2.42e-05	0.00029	Promoter (<=1kb)	10	1788581	1794319	5739	2	LOC_Os07g04180.2	0	LOC_Os07g04180.2;LOC_Os07g04180.1	LOC_Os07g04180;LOC_Os07g04180	0;0	Os07g0134000	amino acid transporter, putative, expressed
LOC_Os07g04190	110.184	71.678	-0.616	0.02699	Chr7	1815021	1815521	501	*	6.04	6.89	3.63	3.26	0.00124	0.00814	Exon (LOC_Os07g04190.1/LOC_Os07g04190, exon 1 of 2)	10	1812193	1816108	3916	2	LOC_Os07g04190.1	587	LOC_Os07g04190.1	LOC_Os07g04190	0	Os07g0134200	receptor protein kinase CLAVATA1 precursor, putative, expressed
LOC_Os07g04310	51.769	7.323	-2.828	3.558e-09	Chr7	1902741	1903241	501	*	7.07	7.66	6.05	1.61	2.86e-07	7.15e-06	Exon (LOC_Os07g04310.1/LOC_Os07g04310, exon 3 of 3)	10	1903120	1905581	2462	2	LOC_Os07g04310.1	2340	LOC_Os07g04310.1	LOC_Os07g04310	0	None	expressed protein
LOC_Os07g05700	207.421	87.21	-1.254	1.188e-10	Chr7	2723179	2723679	501	*	7.42	7.93	6.63	1.3	9.52e-05	0.000946	Promoter (<=1kb)	10	2722024	2723459	1436	2	LOC_Os07g05700.1	0	LOC_Os07g05700.1	LOC_Os07g05700	0	Os07g0151800	expressed protein
LOC_Os07g06840	1683.58	1047.9	-0.686	3.362e-12	Chr7	3342516	3343016	501	*	6.25	6.83	5.29	1.54	0.00467	0.023	3' UTR	10	3342150	3343596	1447	2	LOC_Os07g06840.1	580	LOC_Os07g06834.1;LOC_Os07g06840.1;LOC_Os07g06850.1	LOC_Os07g06834;LOC_Os07g06840;LOC_Os07g06850	3132;0;0	Os07g0162500	gibberellin receptor GID1L2, putative, expressed
LOC_Os07g06990	1340.97	800.222	-0.747	3.252e-14	Chr7	3445149	3445649	501	*	4.6	5.41	2.53	2.88	0.00901	0.0376	3' UTR	10	3444957	3446867	1911	1	LOC_Os07g06990.2	192	LOC_Os07g06980.1;LOC_Os07g06980.2;LOC_Os07g06990.1;LOC_Os07g06990.2;LOC_Os07g07000.1	LOC_Os07g06980;LOC_Os07g06980;LOC_Os07g06990;LOC_Os07g06990;LOC_Os07g07000	-358;-358;0;0;0	Os07g0164200	expressed protein
LOC_Os07g07070	80.612	25.002	-1.687	2.605e-07	Chr7	3486347	3486847	501	*	6.36	6.83	5.64	1.19	0.0102	0.041	3' UTR	10	3485498	3489389	3892	2	LOC_Os07g07070.1	2542	LOC_Os07g07060.1;LOC_Os07g07070.1	LOC_Os07g07060;LOC_Os07g07070	0;0	Os07g0165100	anthranilate phosphoribosyltransferase, putative, expressed
LOC_Os07g07230	165.589	62.287	-1.411	5.805e-11	Chr7	3584954	3585454	501	*	5.21	6.2	-0.14	6.34	6.68e-07	1.37e-05	Exon (LOC_Os07g07230.2/LOC_Os07g07230, exon 2 of 9)	10	3583270	3588394	5125	1	LOC_Os07g07230.1	1684	LOC_Os07g07230.2;LOC_Os07g07230.1;LOC_Os07g07240.1;LOC_Os07g07240.2	LOC_Os07g07230;LOC_Os07g07230;LOC_Os07g07240;LOC_Os07g07240	0;0;8439;8439	Os07g0166700	protein kinase, putative, expressed
LOC_Os07g07320	1188.66	749.972	-0.665	1.36e-14	Chr7	3662523	3663023	501	*	6.35	6.98	5.18	1.8	0.00163	0.0101	Exon (LOC_Os07g07320.1/LOC_Os07g07320, exon 1 of 1)	10	3662374	3663408	1035	1	LOC_Os07g07320.1	149	LOC_Os07g07320.1	LOC_Os07g07320	0	Os07g0168300	glutathione S-transferase, putative, expressed
LOC_Os07g07320	1188.66	749.972	-0.665	1.36e-14	Chr7	3664090	3665079	990	*	6.11	7.08	1.77	5.31	5.01e-13	8.97e-10	Distal Intergenic	10	3662374	3663408	1035	1	LOC_Os07g07320.1	1716	LOC_Os07g07320.1	LOC_Os07g07320	0	Os07g0168300	glutathione S-transferase, putative, expressed
LOC_Os07g07340	1114.23	605.949	-0.877	5.752e-19	Chr7	3671322	3671822	501	*	6.13	7.06	2.68	4.38	2.85e-08	1.34e-06	Exon (LOC_Os07g07340.1/LOC_Os07g07340, exon 2 of 2)	10	3668836	3672256	3421	1	LOC_Os07g07340.1	2486	LOC_Os07g07340.1	LOC_Os07g07340	0	Os07g0168600	glucan endo-1,3-beta-glucosidase precursor, putative, expressed
LOC_Os07g09190	851.949	530.693	-0.682	3.17e-11	Chr7	4821566	4822066	501	*	6.36	7.03	5.07	1.95	0.001	0.00687	Exon (LOC_Os07g09190.1/LOC_Os07g09190, exon 2 of 4)	10	4821207	4824667	3461	1	LOC_Os07g09190.1	359	LOC_Os07g09190.1	LOC_Os07g09190	0	Os07g0190000	transketolase, putative, expressed	OsDXS|OsDXS3
LOC_Os07g10850	64.839	11.92	-2.432	5.398e-09	Chr7	5919570	5920070	501	*	6.77	7.21	6.13	1.08	0.000853	0.00602	5' UTR	10	5911829	5924366	12538	2	LOC_Os07g10850.1	4296	LOC_Os07g10850.1	LOC_Os07g10850	0	None	retrotransposon protein, putative, unclassified, expressed
LOC_Os07g14600	39.075	16.697	-1.224	0.01143	Chr7	8331339	8331839	501	*	6.61	7.12	5.83	1.28	0.00934	0.0386	Promoter (2-3kb)	10	8326643	8329267	2625	2	LOC_Os07g14600.1	-2072	LOC_Os07g14600.1;LOC_Os07g14610.1	LOC_Os07g14600;LOC_Os07g14610	0;0	Os07g0249800	hydrolase, putative, expressed
LOC_Os07g14670	8.155	0	-5.602	0.0009473	Chr7	8361315	8361815	501	*	6.11	6.76	4.89	1.87	3.58e-05	0.000407	Promoter (<=1kb)	10	8361065	8361436	372	2	LOC_Os07g14670.1	0	LOC_Os07g14660.1;LOC_Os07g14670.1;LOC_Os07g14680.1	LOC_Os07g14660;LOC_Os07g14670;LOC_Os07g14680	0;0;4749	None	transposon protein, putative, unclassified, expressed
LOC_Os07g17970	214.2	44.021	-2.283	2.164e-24	Chr7	10636923	10637423	501	*	6.42	7.08	5.15	1.93	0.0054	0.0256	Exon (LOC_Os07g17970.2/LOC_Os07g17970, exon 1 of 4)	10	10636445	10643140	6696	1	LOC_Os07g17970.1	478	LOC_Os07g17970.2;LOC_Os07g17970.1	LOC_Os07g17970;LOC_Os07g17970	0;0	Os07g0280200	AMP-binding domain containing protein, expressed
LOC_Os07g17970	214.2	44.021	-2.283	2.164e-24	Chr7	10633258	10633758	501	*	6.22	6.88	4.98	1.89	0.00563	0.0265	Promoter (2-3kb)	10	10636445	10642610	6166	1	LOC_Os07g17970.2	-2687	LOC_Os07g17970.2;LOC_Os07g17970.1	LOC_Os07g17970;LOC_Os07g17970	0;0	Os07g0280200	AMP-binding domain containing protein, expressed
LOC_Os07g23244	489.947	296.412	-0.725	1.205e-09	Chr7	13098804	13099304	501	*	5.56	6.55	-0.14	6.69	1.44e-08	8.4e-07	Exon (LOC_Os07g23244.1/LOC_Os07g23244, exon 1 of 2)	10	13098610	13103790	5181	1	LOC_Os07g23244.1	194	LOC_Os07g23230.1;LOC_Os07g23244.1	LOC_Os07g23230;LOC_Os07g23244	4165;0	Os07g0415200	ribosomal protein L23 family protein, putative, expressed
LOC_Os07g26860	27.3	9.036	-1.591	0.006267	Chr7	15540035	15540535	501	*	5.65	6.63	0.49	6.14	4.7e-10	8.99e-08	Promoter (2-3kb)	10	15542703	15545877	3175	1	LOC_Os07g26860.1	-2168	LOC_Os07g26860.1	LOC_Os07g26860	-2168	None	expressed protein
LOC_Os07g28400	4434.4	2370.81	-0.904	3.619e-07	Chr7	16601607	16602107	501	*	5.02	5.86	2.79	3.07	0.00601	0.0278	Promoter (<=1kb)	10	16599911	16602036	2126	2	LOC_Os07g28400.1	0	LOC_Os07g28400.1;LOC_Os07g28410.1	LOC_Os07g28400;LOC_Os07g28410	0;0	Os07g0467200	CDGSH iron sulfur domain-containing protein 1, putative, expressed
LOC_Os07g29600	588.944	391.766	-0.589	2.501e-07	Chr7	17400013	17400513	501	*	5.91	6.65	4.33	2.32	0.000986	0.00677	Promoter (<=1kb)	10	17400349	17403101	2753	1	LOC_Os07g29600.2	0	LOC_Os07g29600.1;LOC_Os07g29600.2	LOC_Os07g29600;LOC_Os07g29600	0;0	Os07g0479100	zinc finger, C3HC4 type, domain containing protein, expressed
LOC_Os07g29750	102.964	29.065	-1.815	5.725e-09	Chr7	17491829	17492329	501	*	6.93	7.4	6.23	1.17	0.00875	0.0368	Exon (LOC_Os07g29750.1/LOC_Os07g29750, exon 3 of 4)	10	17490699	17493026	2328	1	LOC_Os07g29750.1	1130	LOC_Os07g29750.1	LOC_Os07g29750	0	Os07g0480800	glycosyl hydrolases family 16, putative, expressed
LOC_Os07g29750	102.964	29.065	-1.815	5.725e-09	Chr7	17485946	17486446	501	*	6.2	6.98	4.44	2.54	2.62e-07	6.7e-06	Distal Intergenic	10	17490699	17493026	2328	1	LOC_Os07g29750.1	-4253	LOC_Os07g29740.1	LOC_Os07g29740	5251	Os07g0480800	glycosyl hydrolases family 16, putative, expressed
LOC_Os07g29750	102.964	29.065	-1.815	5.725e-09	Chr7	17490642	17491142	501	*	5.78	6.5	4.27	2.23	0.000168	0.00154	Promoter (<=1kb)	10	17490699	17493026	2328	1	LOC_Os07g29750.1	0	LOC_Os07g29750.1	LOC_Os07g29750	0	Os07g0480800	glycosyl hydrolases family 16, putative, expressed
LOC_Os07g30950	78.779	36.654	-1.097	0.0008332	Chr7	18328968	18329468	501	*	6.37	6.93	5.45	1.48	0.00118	0.00785	Promoter (<=1kb)	10	18328956	18330801	1846	1	LOC_Os07g30950.1	12	LOC_Os07g30950.1;LOC_Os07g30960.1	LOC_Os07g30950;LOC_Os07g30960	0;0	Os07g0491800	hydroxylase, putative, expressed
LOC_Os07g32020	156.364	52.163	-1.587	1.412e-12	Chr7	19045894	19046394	501	*	6.4	6.99	5.36	1.63	0.00215	0.0126	Promoter (<=1kb)	10	19045831	19048232	2402	1	LOC_Os07g32020.1	63	LOC_Os07g32020.1	LOC_Os07g32020	0	Os07g0503500	UDP-glucoronosyl and UDP-glucosyl transferase domain containing protein, expressed
LOC_Os07g32020	156.364	52.163	-1.587	1.412e-12	Chr7	19041881	19042381	501	*	5.35	6.34	-0.14	6.48	4.5e-07	1e-05	Distal Intergenic	10	19045831	19048232	2402	1	LOC_Os07g32020.1	-3450	LOC_Os07g32010.1	LOC_Os07g32010	0	Os07g0503500	UDP-glucoronosyl and UDP-glucosyl transferase domain containing protein, expressed
LOC_Os07g32340	290.662	158.945	-0.869	3.884e-08	Chr7	19227285	19227785	501	*	6.04	6.88	3.73	3.15	0.000632	0.00471	Exon (LOC_Os07g32340.1/LOC_Os07g32340, exon 4 of 6)	10	19223928	19230480	6553	1	LOC_Os07g32340.3	3357	LOC_Os07g32340.1;LOC_Os07g32340.2;LOC_Os07g32340.3	LOC_Os07g32340;LOC_Os07g32340;LOC_Os07g32340	0;0;0	Os07g0506600	retrotransposon protein, putative, unclassified, expressed
LOC_Os07g32340	290.662	158.945	-0.869	3.884e-08	Chr7	19228435	19228935	501	*	5.72	6.54	3.69	2.85	0.00864	0.0365	Exon (LOC_Os07g32340.1/LOC_Os07g32340, exon 5 of 6)	10	19223928	19230480	6553	1	LOC_Os07g32340.3	4507	LOC_Os07g32340.1;LOC_Os07g32340.2;LOC_Os07g32340.3;LOC_Os07g32350.1;LOC_Os07g32350.2	LOC_Os07g32340;LOC_Os07g32340;LOC_Os07g32340;LOC_Os07g32350;LOC_Os07g32350	0;0;0;7109;7109	Os07g0506600	retrotransposon protein, putative, unclassified, expressed
LOC_Os07g32620	621.34	184.342	-1.751	1.456e-36	Chr7	19454624	19455124	501	*	6.68	7.15	5.97	1.18	0.00211	0.0124	3' UTR	10	19454491	19456170	1680	2	LOC_Os07g32620.1	1046	LOC_Os07g32620.1	LOC_Os07g32620	0	Os07g0510400	anthocyanidin 5,3-O-glucosyltransferase, putative, expressed
LOC_Os07g33650	196.058	98.387	-0.992	3.202e-06	Chr7	20109027	20109527	501	*	5.38	6.32	1.54	4.78	2.3e-07	6.1e-06	3' UTR	10	20106812	20109781	2970	1	LOC_Os07g33650.2	2215	LOC_Os07g33650.3;LOC_Os07g33650.1;LOC_Os07g33650.2	LOC_Os07g33650;LOC_Os07g33650;LOC_Os07g33650	0;0;0	Os07g0520600	expressed protein
LOC_Os07g33780	464.897	299.005	-0.638	5.171e-07	Chr7	20205425	20205925	501	*	6.36	7.07	4.91	2.16	6.83e-05	0.000708	Distal Intergenic	10	20214025	20218702	4678	1	LOC_Os07g33780.1	-8100				Os07g0522500	pleiotropic drug resistance protein 5, putative, expressed	OsABCG43|PDR5	shoot|root|transporter	RiceABCG43Is Cd Inducible and Confers Cd Tolerance on Yeast
LOC_Os07g33780	464.897	299.005	-0.638	5.171e-07	Chr7	20207856	20208356	501	*	4.73	5.7	-0.14	5.85	3.68e-06	5.69e-05	Distal Intergenic	10	20214025	20218702	4678	1	LOC_Os07g33780.1	-5669				Os07g0522500	pleiotropic drug resistance protein 5, putative, expressed	OsABCG43|PDR5	shoot|root|transporter	RiceABCG43Is Cd Inducible and Confers Cd Tolerance on Yeast
LOC_Os07g36544	126.137	63.456	-0.996	6.723e-05	Chr7	21849990	21850490	501	*	5.97	6.66	4.59	2.07	0.00515	0.0248	Exon (LOC_Os07g36544.1/LOC_Os07g36544, exon 1 of 6)	10	21846326	21851297	4972	2	LOC_Os07g36544.1	807	LOC_Os07g36544.1;LOC_Os07g36544.2	LOC_Os07g36544;LOC_Os07g36544	0;0	Os07g0550500	serine/threonine-protein kinase receptor precursor, putative, expressed
LOC_Os07g37310	243.18	121.359	-1.006	7.171e-09	Chr7	22350789	22351289	501	*	5.67	6.53	3.24	3.29	0.000779	0.0056	Promoter (2-3kb)	10	22346421	22348417	1997	2	LOC_Os07g37310.1	-2372	LOC_Os07g37310.1;LOC_Os07g37320.1	LOC_Os07g37310;LOC_Os07g37320	0;4517	Os07g0559400	uncharacterized secreted protein, putative, expressed
LOC_Os07g37420	558.572	309.825	-0.857	4.213e-09	Chr7	22416508	22417008	501	*	6.28	6.78	5.49	1.3	0.00722	0.0319	Exon (LOC_Os07g37420.1/LOC_Os07g37420, exon 1 of 1)	10	22416143	22417233	1091	1	LOC_Os07g37420.1	365	LOC_Os07g37410.1;LOC_Os07g37420.1;LOC_Os07g37430.1;LOC_Os07g37440.1	LOC_Os07g37410;LOC_Os07g37420;LOC_Os07g37430;LOC_Os07g37440	0;0;-937;0	Os07g0561500	versicolorin reductase, putative, expressed
LOC_Os07g37810	92.395	49.078	-0.9	0.005408	Chr7	22680977	22681477	501	*	4.71	5.69	-0.14	5.83	3.74e-06	5.76e-05	3' UTR	10	22671412	22676749	5338	2	LOC_Os07g37810.2	-4228	LOC_Os07g37820.1	LOC_Os07g37820	0	Os07g0565400	STRUBBELIG-RECEPTOR FAMILY 1 precursor, putative, expressed
LOC_Os07g38000	745.692	388.901	-0.942	2.805e-15	Chr7	22799785	22800285	501	*	5.8	6.62	3.73	2.89	2.7e-07	6.85e-06	Promoter (<=1kb)	10	22798819	22800192	1374	2	LOC_Os07g38000.2	0	LOC_Os07g37990.1;LOC_Os07g38000.2;LOC_Os07g38000.1;LOC_Os07g38010.1	LOC_Os07g37990;LOC_Os07g38000;LOC_Os07g38000;LOC_Os07g38010	0;0;0;2596	Os07g0567400	cytochrome c, putative, expressed
LOC_Os07g38130	93.529	36.651	-1.352	3.451e-06	Chr7	22876692	22877192	501	*	6.34	6.83	5.58	1.25	0.00883	0.0371	Promoter (<=1kb)	10	22874252	22875707	1456	2	LOC_Os07g38130.1	-985	LOC_Os07g38130.1;LOC_Os07g38140.1	LOC_Os07g38130;LOC_Os07g38140	0;0	Os07g0568700	polygalacturonase inhibitor 1 precursor, putative, expressed	OsFOR1|PGIP	spikelet|lemma|meristem|panicle|palea|stem|stamen|inflorescence|floral|floral organ number|seedling|root	The OsFOR1 gene encodes a polygalacturonase-inhibiting protein (PGIP) that regulates floral organ number in rice
LOC_Os07g38130	93.529	36.651	-1.352	3.451e-06	Chr7	22871648	22872148	501	*	5.34	6.29	1.54	4.75	2.6e-07	6.66e-06	Downstream (2-3kb)	10	22874252	22875707	1456	2	LOC_Os07g38130.1	3559	LOC_Os07g38130.1	LOC_Os07g38130	0	Os07g0568700	polygalacturonase inhibitor 1 precursor, putative, expressed	OsFOR1|PGIP	spikelet|lemma|meristem|panicle|palea|stem|stamen|inflorescence|floral|floral organ number|seedling|root	The OsFOR1 gene encodes a polygalacturonase-inhibiting protein (PGIP) that regulates floral organ number in rice
LOC_Os07g38130	93.529	36.651	-1.352	3.451e-06	Chr7	22874595	22875095	501	*	6.68	7.11	6.06	1.05	0.0067	0.0302	3' UTR	10	22874252	22875707	1456	2	LOC_Os07g38130.1	612	LOC_Os07g38130.1	LOC_Os07g38130	0	Os07g0568700	polygalacturonase inhibitor 1 precursor, putative, expressed	OsFOR1|PGIP	spikelet|lemma|meristem|panicle|palea|stem|stamen|inflorescence|floral|floral organ number|seedling|root	The OsFOR1 gene encodes a polygalacturonase-inhibiting protein (PGIP) that regulates floral organ number in rice
LOC_Os07g38130	93.529	36.651	-1.352	3.451e-06	Chr7	22877201	22877701	501	*	6.13	6.73	5.1	1.62	0.00153	0.00961	Promoter (1-2kb)	10	22874252	22875707	1456	2	LOC_Os07g38130.1	-1494	LOC_Os07g38130.1;LOC_Os07g38140.1;LOC_Os07g38150.1	LOC_Os07g38130;LOC_Os07g38140;LOC_Os07g38150	0;0;4364	Os07g0568700	polygalacturonase inhibitor 1 precursor, putative, expressed	OsFOR1|PGIP	spikelet|lemma|meristem|panicle|palea|stem|stamen|inflorescence|floral|floral organ number|seedling|root	The OsFOR1 gene encodes a polygalacturonase-inhibiting protein (PGIP) that regulates floral organ number in rice
LOC_Os07g38290	44.384	19.593	-1.169	0.009499	Chr7	23001450	23001950	501	*	5.08	5.95	2.56	3.39	0.00157	0.00982	Promoter (<=1kb)	10	22996769	23001763	4995	2	LOC_Os07g38290.1	0	LOC_Os07g38290.1;LOC_Os07g38300.1;LOC_Os07g38300.2;LOC_Os07g38300.5	LOC_Os07g38290;LOC_Os07g38300;LOC_Os07g38300;LOC_Os07g38300	0;-1430;-1430;-1430	Os07g0570550	plastocyanin-like domain containing protein, putative, expressed
LOC_Os07g38310	83.188	49.806	-0.74	0.01232	Chr7	23013580	23014080	501	*	5.45	6.34	2.68	3.66	0.000188	0.0017	Downstream (<1kb)	10	23014944	23015708	765	2	LOC_Os07g38310.1	1628	LOC_Os07g38310.1	LOC_Os07g38310	1628	None	expressed protein
LOC_Os07g38470	86.864	21.859	-1.988	1.497e-09	Chr7	23110159	23110659	501	*	5.26	6.2	1.54	4.66	3.86e-07	8.9e-06	Promoter (<=1kb)	10	23110468	23110791	324	1	LOC_Os07g38470.1	0	LOC_Os07g38460.1;LOC_Os07g38470.1;LOC_Os07g38480.1	LOC_Os07g38460;LOC_Os07g38470;LOC_Os07g38480	3913;0;0	Os07g0572400	expressed protein
LOC_Os07g38790	384.714	225.43	-0.77	1.991e-07	Chr7	23274536	23275036	501	*	6.6	7.24	5.44	1.8	0.000793	0.00568	Exon (LOC_Os07g38790.1/LOC_Os07g38790, exon 2 of 2)	10	23274099	23276580	2482	2	LOC_Os07g38790.1	1544	LOC_Os07g38790.1	LOC_Os07g38790	0	Os07g0575500	beta-hexosaminidase precursor, putative, expressed
LOC_Os07g38950	183.771	101.549	-0.856	9.896e-06	Chr7	23353775	23354275	501	*	6.47	6.98	5.68	1.3	0.00367	0.0191	3' UTR	10	23352953	23354781	1829	1	LOC_Os07g38950.1	822	LOC_Os07g38940.1;LOC_Os07g38950.1	LOC_Os07g38940;LOC_Os07g38950	4353;0	Os07g0577500	expressed protein
LOC_Os07g39980	474.421	287.398	-0.721	9.134e-09	Chr7	23983304	23983804	501	*	5.28	6.05	3.53	2.52	0.000212	0.00188	Promoter (1-2kb)	10	23985274	23989956	4683	1	LOC_Os07g39980.1	-1470	LOC_Os07g39970.1;LOC_Os07g39980.1	LOC_Os07g39970;LOC_Os07g39980	2764;0	Os07g0588800	GA22009-PA, putative, expressed
LOC_Os07g40150	40.285	11.886	-1.762	0.000361	Chr7	24093703	24094203	501	*	6.57	7.14	5.61	1.53	0.000979	0.00674	Distal Intergenic	10	24087320	24089726	2407	2	LOC_Os07g40150.1	-3977				Os07g0591100	expressed protein
LOC_Os07g40150	40.285	11.886	-1.762	0.000361	Chr7	24090454	24090954	501	*	6.2	6.89	4.84	2.04	1.44e-06	2.6e-05	Promoter (<=1kb)	10	24087320	24089726	2407	2	LOC_Os07g40150.1	-728	LOC_Os07g40150.1	LOC_Os07g40150	-728	Os07g0591100	expressed protein
LOC_Os07g41600	47.239	13.88	-1.767	8.34e-05	Chr7	24938915	24939415	501	*	5.34	6.19	3.04	3.15	7.56e-05	0.000774	Promoter (1-2kb)	10	24934262	24937069	2808	2	LOC_Os07g41600.3	-1846	LOC_Os07g41600.1;LOC_Os07g41600.2;LOC_Os07g41600.3	LOC_Os07g41600;LOC_Os07g41600;LOC_Os07g41600	-1846;-1846;-1846	Os07g0606900	proline-rich protein, putative, expressed
LOC_Os07g42250	518.326	308.771	-0.746	2.815e-10	Chr7	25289360	25289860	501	*	6.25	6.8	5.35	1.45	0.000689	0.00506	3' UTR	10	25287511	25290131	2621	1	LOC_Os07g42250.1	1849	LOC_Os07g42250.1;LOC_Os07g42260.1;LOC_Os07g42260.2	LOC_Os07g42250;LOC_Os07g42260;LOC_Os07g42260	0;0;3933	Os07g0614000	strictosidine synthase, putative, expressed
LOC_Os07g42970	143.829	83.479	-0.786	0.0004668	Chr7	25743166	25743666	501	*	6.36	6.87	5.57	1.3	0.00771	0.0334	Exon (LOC_Os07g42970.1/LOC_Os07g42970, exon 3 of 6)	10	25741014	25744880	3867	1	LOC_Os07g42970.1	2152	LOC_Os07g42970.1	LOC_Os07g42970	0	None	UDP-glucoronosyl and UDP-glucosyl transferase domain containing protein, expressed
LOC_Os07g43070	140.621	74.021	-0.924	4.869e-05	Chr7	25807162	25807662	501	*	4.44	5.39	0.49	4.9	3.95e-05	0.000443	Promoter (<=1kb)	10	25804317	25807753	3437	2	LOC_Os07g43070.1	91	LOC_Os07g43070.1	LOC_Os07g43070	0	Os07g0623600	expressed protein
LOC_Os07g43700	1770.84	960.977	-0.883	2.691e-28	Chr7	26154888	26155388	501	*	4.95	5.93	-0.14	6.07	1.06e-06	2e-05	5' UTR	10	26153825	26155933	2109	2	LOC_Os07g43700.2	545	LOC_Os07g43690.1;LOC_Os07g43700.2;LOC_Os07g43700.1;LOC_Os07g43710.1	LOC_Os07g43690;LOC_Os07g43700;LOC_Os07g43700;LOC_Os07g43710	0;0;0;-2962	Os07g0630800	lactate/malate dehydrogenase, putative, expressed
LOC_Os07g45080	534.524	290.115	-0.885	6.29e-12	Chr7	26911468	26911968	501	*	5.42	6.24	3.31	2.93	0.00738	0.0324	Promoter (<=1kb)	10	26911517	26912446	930	1	LOC_Os07g45080.1	0	LOC_Os07g45074.1;LOC_Os07g45080.1;LOC_Os07g45090.1	LOC_Os07g45074;LOC_Os07g45080;LOC_Os07g45090	-2923;0;-1496	Os07g0645300	expressed protein
LOC_Os07g45100	180.798	100.609	-0.842	8.92e-05	Chr7	26923263	26923763	501	*	6.45	7.26	4.46	2.79	6.5e-08	2.41e-06	Exon (LOC_Os07g45100.1/LOC_Os07g45100, exon 1 of 5)	10	26918373	26923890	5518	2	LOC_Os07g45100.1	127	LOC_Os07g45100.1;LOC_Os07g45110.1	LOC_Os07g45100;LOC_Os07g45110	0;-1487	Os07g0645500	endonuclease/exonuclease/phosphatase family domain containing protein, expressed
LOC_Os07g46190	41.379	12.084	-1.773	0.0002214	Chr7	27570988	27571488	501	*	6.39	7.19	4.45	2.73	1.36e-08	8.11e-07	3' UTR	10	27569369	27571494	2126	1	LOC_Os07g46190.1	1619	LOC_Os07g46190.1;LOC_Os07g46200.1	LOC_Os07g46190;LOC_Os07g46200	0;2923	Os07g0655600	pectinesterase, putative, expressed
LOC_Os07g46630	280.48	150.443	-0.899	1.884e-08	Chr7	27868384	27868884	501	*	4.95	5.92	-0.14	6.06	1.08e-06	2.03e-05	3' UTR	10	27865026	27868232	3207	1	LOC_Os07g46630.1	3358	LOC_Os07g46630.1;LOC_Os07g46640.1;LOC_Os07g46640.2	LOC_Os07g46630;LOC_Os07g46640;LOC_Os07g46640	3358;0;0	Os07g0661000	AMP deaminase, putative, expressed
LOC_Os07g46670	1069.22	639.258	-0.744	8.563e-16	Chr7	27890573	27891073	501	*	6.4	7.26	3.98	3.28	8e-14	2.71e-10	3' UTR	10	27889413	27891316	1904	2	LOC_Os07g46670.2	243	LOC_Os07g46660.1;LOC_Os07g46660.2;LOC_Os07g46670.2;LOC_Os07g46670.3	LOC_Os07g46660;LOC_Os07g46660;LOC_Os07g46670;LOC_Os07g46670	7021;7021;0;0	Os07g0661400	early response to dehydration 15, putative, expressed
LOC_Os07g46800	91.935	37.786	-1.287	1.13e-05	Chr7	27969777	27970277	501	*	5.49	6.48	-0.14	6.62	1.49e-08	8.61e-07	Promoter (<=1kb)	10	27969690	27970310	621	2	LOC_Os07g46800.1	33	LOC_Os07g46790.1;LOC_Os07g46800.1	LOC_Os07g46790;LOC_Os07g46800	9337;0	Os07g0663000	expressed protein
LOC_Os07g46846	351.509	139.567	-1.335	1.683e-19	Chr7	28003295	28003795	501	*	5.59	6.54	1.77	4.77	3.89e-06	5.94e-05	Exon (LOC_Os07g46846.1/LOC_Os07g46846, exon 3 of 3)	10	28002587	28004412	1826	1	LOC_Os07g46846.1	708	LOC_Os07g46846.1;LOC_Os07g46852.4;LOC_Os07g46852.3;LOC_Os07g46852.1;LOC_Os07g46852.2	LOC_Os07g46846;LOC_Os07g46852;LOC_Os07g46852;LOC_Os07g46852;LOC_Os07g46852	0;0;0;0;0	Os07g0663700	sex determination protein tasselseed-2, putative, expressed
LOC_Os07g48040	3061.57	1822.7	-0.747	1.542e-32	Chr7	28685106	28685606	501	*	5.2	6.06	2.77	3.29	0.000462	0.00363	3' UTR	10	28684118	28685863	1746	1	LOC_Os07g48040.1	988	LOC_Os07g48040.1;LOC_Os07g48050.1	LOC_Os07g48040;LOC_Os07g48050	0;0	Os07g0677400	peroxidase precursor, putative, expressed	POX5.1|prx113
LOC_Os07g49114	75.973	31.974	-1.249	0.0002667	Chr7	29404562	29405062	501	*	5.12	6.1	-0.14	6.24	4.26e-07	9.59e-06	5' UTR	10	29404417	29405293	877	1	LOC_Os07g49114.1	145	LOC_Os07g49110.1;LOC_Os07g49114.1	LOC_Os07g49110;LOC_Os07g49114	0;0	Os07g0691300	wound-induced protein WI12, putative, expressed
LOC_Os07g49114	75.973	31.974	-1.249	0.0002667	Chr7	29402604	29403104	501	*	6.62	7.1	5.9	1.2	0.0109	0.0432	Promoter (1-2kb)	10	29404417	29405293	877	1	LOC_Os07g49114.1	-1313	LOC_Os07g49110.1;LOC_Os07g49114.1	LOC_Os07g49110;LOC_Os07g49114	0;0	Os07g0691300	wound-induced protein WI12, putative, expressed
LOC_Os07g49370	61.106	30.484	-0.998	0.01268	Chr7	29568731	29569231	501	*	6.09	6.72	4.95	1.78	0.000724	0.00527	Exon (LOC_Os07g49370.1/LOC_Os07g49370, exon 2 of 3)	10	29565824	29571714	5891	2	LOC_Os07g49370.1	2483	LOC_Os07g49370.1	LOC_Os07g49370	0	Os07g0694400	glycosyltransferase family 43 protein, putative, expressed	OsIRX9	cell wall|stem	Three Novel Rice Genes Closely Related to the Arabidopsis IRX9, IRX9L, and IRX14 Genes and Their Roles in Xylan Biosynthesis
LOC_Os08g01330	110.735	61.909	-0.836	0.002215	Chr8	211370	211870	501	*	6.27	6.9	5.16	1.74	1.81e-05	0.000224	Exon (LOC_Os08g01330.1/LOC_Os08g01330, exon 2 of 3)	11	210413	212451	2039	2	LOC_Os08g01330.1	581	LOC_Os08g01330.1	LOC_Os08g01330	0	Os08g0103900	no apical meristem protein, putative, expressed	OsSWN3
LOC_Os08g02060	1161.06	741.956	-0.648	4.727e-11	Chr8	671589	672089	501	*	4.68	5.58	1.74	3.83	0.000144	0.00136	Exon (LOC_Os08g02060.1/LOC_Os08g02060, exon 2 of 4)	11	671260	674727	3468	1	LOC_Os08g02060.1	329	LOC_Os08g02060.1	LOC_Os08g02060	0	Os08g0112600	expressed protein
LOC_Os08g02300	14.757	4.524	-1.703	0.04271	Chr8	844915	845415	501	*	6.24	6.86	5.14	1.72	0.000111	0.00108	Distal Intergenic	11	856109	858607	2499	1	LOC_Os08g02300.1	-10694				Os08g0115800	no apical meristem protein, putative, expressed	OsSWN2
LOC_Os08g02600	39.276	17.179	-1.214	0.03036	Chr8	1075328	1075828	501	*	6.77	7.2	6.16	1.03	0.00256	0.0144	Promoter (<=1kb)	11	1075293	1076075	783	1	LOC_Os08g02600.1	35	LOC_Os08g02590.1;LOC_Os08g02600.1	LOC_Os08g02590;LOC_Os08g02600	1157;0	Os08g0119500	methyltransferase domain containing protein, expressed
LOC_Os08g03380	1564.79	901.862	-0.797	1.17e-17	Chr8	1584395	1584895	501	*	5.48	6.09	4.43	1.66	0.00392	0.0201	Promoter (<=1kb)	11	1580877	1584989	4113	2	LOC_Os08g03380.1	94	LOC_Os08g03380.1;LOC_Os08g03390.2;LOC_Os08g03390.1	LOC_Os08g03380;LOC_Os08g03390;LOC_Os08g03390	0;-231;-231	Os08g0127600	heat shock protein DnaJ, putative, expressed
LOC_Os08g06220	112.081	54.995	-1.034	6.698e-05	Chr8	3430580	3431080	501	*	6.69	7.25	5.75	1.5	0.000582	0.0044	Promoter (<=1kb)	11	3430905	3432342	1438	1	LOC_Os08g06220.1	0	LOC_Os08g06210.1;LOC_Os08g06220.1;LOC_Os08g06230.1	LOC_Os08g06210;LOC_Os08g06220;LOC_Os08g06230	4844;0;7145	Os08g0158800	transferase, putative, expressed
LOC_Os08g06380	1474.24	437.301	-1.753	6.302e-57	Chr8	3554022	3554522	501	*	6.32	6.92	5.26	1.66	0.00766	0.0333	Distal Intergenic	11	3544163	3550661	6499	2	LOC_Os08g06380.1	-3361				Os08g0160500	CSLF6 - cellulose synthase-like family F; beta1,3;1,4 glucan synthase, expressed	CslF6	stem|height|vegetative|cell wall	Loss of Cellulose synthase-like F6 function affects mixed-linkage glucan deposition, cell wall mechanical properties, and defense responses in vegetative tissues of rice|Cell wall properties in Oryza sativa influence mesophyll CO2 conductance.
LOC_Os08g06885	185.794	103.204	-0.851	4.393e-05	Chr8	3843287	3843787	501	*	5.37	6.29	2.06	4.23	8.35e-05	0.000844	Promoter (<=1kb)	11	3844468	3845152	685	1	LOC_Os08g06885.1	-681	LOC_Os08g06880.1;LOC_Os08g06885.1	LOC_Os08g06880;LOC_Os08g06885	4098;0	Os08g0165901	expressed protein
LOC_Os08g06885	185.794	103.204	-0.851	4.393e-05	Chr8	3844428	3844928	501	*	4.86	5.84	-0.14	5.98	1.51e-06	2.7e-05	Promoter (<=1kb)	11	3844468	3845152	685	1	LOC_Os08g06885.1	0	LOC_Os08g06880.1;LOC_Os08g06885.1	LOC_Os08g06880;LOC_Os08g06885	5239;0	Os08g0165901	expressed protein
LOC_Os08g09930	122.199	64.151	-0.936	0.0001539	Chr8	5740384	5740884	501	*	5.41	6.31	2.56	3.75	0.000125	0.0012	Distal Intergenic	11	5735208	5735969	762	1	LOC_Os08g09930.1	5176				Os08g0199200	expressed protein
LOC_Os08g10300	474.857	198.761	-1.257	7.003e-22	Chr8	5990839	5991339	501	*	5.37	6.25	2.68	3.57	0.00039	0.00315	Distal Intergenic	11	5998021	6005220	7200	1	LOC_Os08g10300.1	-6682	LOC_Os08g10290.1	LOC_Os08g10290	9911	Os08g0203300	SHR5-receptor-like kinase, putative, expressed
LOC_Os08g12800	333.072	206.6	-0.688	3.877e-06	Chr8	7583858	7584358	501	*	5.53	6.26	4.02	2.24	0.000425	0.00339	5' UTR	11	7583446	7588419	4974	1	LOC_Os08g12800.1	412	LOC_Os08g12800.1	LOC_Os08g12800	0	Os08g0224500	glucan endo-1,3-beta-glucosidase precursor, putative, expressed
LOC_Os08g13920	5991.52	3783.47	-0.663	8.241e-30	Chr8	8327886	8328386	501	*	5.51	6.5	-0.14	6.64	7.59e-08	2.69e-06	Promoter (<=1kb)	11	8327866	8329399	1534	1	LOC_Os08g13920.1	20	LOC_Os08g13920.1	LOC_Os08g13920	0	Os08g0237000	glycosyl hydrolases family 16, putative, expressed	OsXTH8	gibberellin|seedling|leaf|cell elongation|root|vascular bundle|growth|height|sheath	Characterization of a xyloglucan endotransglucosylase gene that is up-regulated by gibberellin in rice
LOC_Os08g13920	5991.52	3783.47	-0.663	8.241e-30	Chr8	8322559	8323059	501	*	7.01	7.53	6.2	1.33	0.00129	0.00838	Distal Intergenic	11	8327866	8329399	1534	1	LOC_Os08g13920.1	-4807				Os08g0237000	glycosyl hydrolases family 16, putative, expressed	OsXTH8	gibberellin|seedling|leaf|cell elongation|root|vascular bundle|growth|height|sheath	Characterization of a xyloglucan endotransglucosylase gene that is up-regulated by gibberellin in rice
LOC_Os08g13920	5991.52	3783.47	-0.663	8.241e-30	Chr8	8328589	8329089	501	*	6.25	6.87	5.15	1.72	3.3e-05	0.000379	3' UTR	11	8327866	8329399	1534	1	LOC_Os08g13920.1	723	LOC_Os08g13920.1	LOC_Os08g13920	0	Os08g0237000	glycosyl hydrolases family 16, putative, expressed	OsXTH8	gibberellin|seedling|leaf|cell elongation|root|vascular bundle|growth|height|sheath	Characterization of a xyloglucan endotransglucosylase gene that is up-regulated by gibberellin in rice
LOC_Os08g14570	1000.71	639.061	-0.648	1.204e-12	Chr8	8760059	8760559	501	*	4.63	5.6	-0.14	5.74	7.68e-06	0.000106	Promoter (<=1kb)	11	8760073	8765208	5136	1	LOC_Os08g14570.1	0	LOC_Os08g14570.1	LOC_Os08g14570	0	Os08g0243500	NADPH reductase, putative, expressed
LOC_Os08g14720	39.44	21.012	-0.915	0.04606	Chr8	8845609	8846109	501	*	6.84	7.35	6.05	1.3	0.00137	0.00881	Promoter (<=1kb)	11	8845477	8846061	585	2	LOC_Os08g14720.1	0	LOC_Os08g14710.1;LOC_Os08g14720.1	LOC_Os08g14710;LOC_Os08g14720	0;0	None	expressed protein
LOC_Os08g17500	38.023	4.25	-3.175	9.452e-08	Chr8	10718376	10718876	501	*	6.68	7.2	5.83	1.37	0.000116	0.00112	Promoter (<=1kb)	11	10718581	10720791	2211	1	LOC_Os08g17500.1	0	LOC_Os08g17500.1	LOC_Os08g17500	0	Os08g0277200	cinnamoyl-CoA reductase, putative, expressed
LOC_Os08g17500	38.023	4.25	-3.175	9.452e-08	Chr8	10717355	10717855	501	*	6.54	7.08	5.65	1.43	0.00103	0.007	Promoter (<=1kb)	11	10718581	10720791	2211	1	LOC_Os08g17500.1	-726	LOC_Os08g17500.1	LOC_Os08g17500	0	Os08g0277200	cinnamoyl-CoA reductase, putative, expressed
LOC_Os08g20400	279.646	175.268	-0.678	5.068e-05	Chr8	12248607	12249107	501	*	6.45	6.95	5.69	1.26	0.00328	0.0175	Exon (LOC_Os08g20400.1/LOC_Os08g20400, exon 1 of 1)	11	12248266	12249365	1100	1	LOC_Os08g20400.1	341	LOC_Os08g20390.1;LOC_Os08g20400.1	LOC_Os08g20390;LOC_Os08g20400	-1760;0	Os08g0299200	adenylate cyclase family protein, expressed
LOC_Os08g20492	71.595	31.857	-1.16	0.0007211	Chr8	12307782	12308282	501	*	6.29	6.87	5.3	1.57	9.69e-05	0.000959	Promoter (1-2kb)	11	12304155	12306485	2331	2	LOC_Os08g20492.1	-1297	LOC_Os08g20492.1;LOC_Os08g20500.1	LOC_Os08g20492;LOC_Os08g20500	-1297;-1313	None	OsFBX285 - F-box domain containing protein, expressed
LOC_Os08g23410	5833.64	3568.57	-0.709	2.192e-34	Chr8	14152897	14153397	501	*	6.28	6.76	5.57	1.19	0.011	0.0435	Distal Intergenic	11	14157550	14158861	1312	2	LOC_Os08g23410.1	5464				Os08g0323400	rubredoxin family protein, putative, expressed
LOC_Os08g28080	36.502	13.046	-1.481	0.002515	Chr8	17127363	17127863	501	*	6.48	6.93	5.83	1.09	0.00237	0.0135	Intron (LOC_Os08g28080.1/LOC_Os08g28080, intron 5 of 15)	11	17122122	17132608	10487	2	LOC_Os08g28080.1	4745	LOC_Os08g28080.1	LOC_Os08g28080	0	Os08g0368000	coatomer subunit delta, putative, expressed
LOC_Os08g28870	173.249	96.335	-0.848	2.553e-05	Chr8	17651715	17652215	501	*	5.4	6.39	-0.14	6.53	3.48e-08	1.55e-06	Exon (LOC_Os08g28870.1/LOC_Os08g28870, exon 1 of 2)	11	17650554	17653886	3333	2	LOC_Os08g28870.1	1671	LOC_Os08g28870.1	LOC_Os08g28870	0	Os08g0376300	receptor-like protein kinase 5 precursor, putative, expressed
LOC_Os08g29110	675.869	371.784	-0.863	6.117e-14	Chr8	17820053	17820553	501	*	5.42	6.4	-0.14	6.54	2.74e-08	1.3e-06	Promoter (<=1kb)	11	17818423	17820085	1663	2	LOC_Os08g29110.2	0	LOC_Os08g29100.1;LOC_Os08g29110.2;LOC_Os08g29110.1;LOC_Os08g29124.1	LOC_Os08g29100;LOC_Os08g29110;LOC_Os08g29110;LOC_Os08g29124	0;0;0;0	Os08g0378900	thioredoxin, putative, expressed	OsTRXZ	cold stress|stress	TSV, a putative plastidic oxidoreductase, protects rice chloroplasts from cold stress during development by interacting with plastidic thioredoxin Z.
LOC_Os08g30080	87.483	32.355	-1.441	2.214e-06	Chr8	18492780	18493280	501	*	6.15	6.63	5.42	1.21	0.00439	0.0219	Promoter (<=1kb)	11	18491723	18493264	1542	2	LOC_Os08g30080.1	0	LOC_Os08g30080.1	LOC_Os08g30080	0	Os08g0390200	1-aminocyclopropane-1-carboxylate oxidase homolog 4, putative, expressed
LOC_Os08g32160	20.942	7.433	-1.506	0.04596	Chr8	19951504	19952004	501	*	6.09	6.71	4.96	1.75	0.000194	0.00175	Exon (LOC_Os08g32160.1/LOC_Os08g32160, exon 1 of 3)	11	19950552	19952391	1840	2	LOC_Os08g32160.1	387	LOC_Os08g32160.1;LOC_Os08g32170.1	LOC_Os08g32160;LOC_Os08g32170	0;0	Os08g0417000	oxidoreductase, 2OG-FeII oxygenase domain containing protein, putative, expressed
LOC_Os08g32400	2353.98	1359.92	-0.791	0.01802	Chr8	20065967	20066467	501	*	6.39	7.17	4.62	2.54	0.00426	0.0214	Promoter (<=1kb)	11	20066107	20068510	2404	1	LOC_Os08g32400.1	0	LOC_Os08g32400.1	LOC_Os08g32400	0	Os08g0419500	expressed protein
LOC_Os08g33440	531.198	231.562	-1.199	1.108e-23	Chr8	20862900	20863400	501	*	5.69	6.58	2.89	3.69	0.000105	0.00103	Promoter (<=1kb)	11	20858724	20862259	3536	2	LOC_Os08g33440.1	-641	LOC_Os08g33440.1	LOC_Os08g33440	-641	Os08g0431300	2-oxo acid dehydrogenases acyltransferase domain containing protein, expressed
LOC_Os08g34240	105.434	12.904	-3.021	7.717e-19	Chr8	21467270	21467770	501	*	6.25	6.85	5.21	1.65	0.00177	0.0108	Exon (LOC_Os08g34240.1/LOC_Os08g34240, exon 1 of 1)	11	21466751	21468619	1869	1	LOC_Os08g34240.1	519	LOC_Os08g34240.1	LOC_Os08g34240	0	Os08g0441100	CAMK_KIN1/SNF1/Nim1_like.33 - CAMK includes calcium/calmodulin depedent protein kinases, expressed
LOC_Os08g34240	105.434	12.904	-3.021	7.717e-19	Chr8	21469426	21469926	501	*	6.1	6.65	5.2	1.45	0.00251	0.0141	Distal Intergenic	11	21466751	21468619	1869	1	LOC_Os08g34240.1	2675	LOC_Os08g34240.1	LOC_Os08g34240	0	Os08g0441100	CAMK_KIN1/SNF1/Nim1_like.33 - CAMK includes calcium/calmodulin depedent protein kinases, expressed
LOC_Os08g34280	703.891	99.426	-2.824	2.494e-100	Chr8	21512778	21513278	501	*	6.39	6.93	5.51	1.42	0.000699	0.00512	Exon (LOC_Os08g34280.1/LOC_Os08g34280, exon 2 of 5)	11	21506419	21513656	7238	2	LOC_Os08g34280.1	378	LOC_Os08g34280.1	LOC_Os08g34280	0	Os08g0441500	cinnamoyl-CoA reductase, putative, expressed
LOC_Os08g34280	703.891	99.426	-2.824	2.494e-100	Chr8	21510111	21510611	501	*	6.08	6.69	4.97	1.72	0.000141	0.00133	Exon (LOC_Os08g34280.1/LOC_Os08g34280, exon 4 of 5)	11	21506419	21513656	7238	2	LOC_Os08g34280.1	3045	LOC_Os08g34280.1	LOC_Os08g34280	0	Os08g0441500	cinnamoyl-CoA reductase, putative, expressed
LOC_Os08g34310	30.641	13.044	-1.226	0.03016	Chr8	21533746	21534246	501	*	6.56	7.07	5.77	1.3	0.00281	0.0155	Exon (LOC_Os08g34310.1/LOC_Os08g34310, exon 2 of 6)	11	21531338	21535237	3900	2	LOC_Os08g34310.1	991	LOC_Os08g34300.1;LOC_Os08g34310.1;LOC_Os08g34320.1	LOC_Os08g34300;LOC_Os08g34310;LOC_Os08g34320	0;0;0	Os08g0441900	ZOS8-05 - C2H2 zinc finger protein, expressed
LOC_Os08g34550	163.388	48.267	-1.757	5.641e-15	Chr8	21700706	21701206	501	*	6.76	7.24	6.04	1.2	0.00891	0.0373	Exon (LOC_Os08g34550.1/LOC_Os08g34550, exon 1 of 1)	11	21700152	21702495	2344	1	LOC_Os08g34550.1	554	LOC_Os08g34550.1	LOC_Os08g34550	0	Os08g0445000	RING-H2 finger protein, putative, expressed
LOC_Os08g34790	15.819	3.033	-2.372	0.006741	Chr8	21874790	21875290	501	*	6.33	7.02	4.98	2.04	7.88e-06	0.000109	Exon (LOC_Os08g34790.1/LOC_Os08g34790, exon 1 of 5)	11	21872411	21875498	3088	2	LOC_Os08g34790.1	208	LOC_Os08g34780.1;LOC_Os08g34790.1	LOC_Os08g34780;LOC_Os08g34790	0;0	Os08g0448000	AMP-binding domain containing protein, expressed	Os4CL5
LOC_Os08g34790	15.819	3.033	-2.372	0.006741	Chr8	21877511	21878011	501	*	5.45	6.43	-0.14	6.57	4.67e-08	1.9e-06	Promoter (2-3kb)	11	21872411	21875498	3088	2	LOC_Os08g34790.1	-2013	LOC_Os08g34790.1	LOC_Os08g34790	0	Os08g0448000	AMP-binding domain containing protein, expressed	Os4CL5
LOC_Os08g35090	110.018	33.649	-1.704	6.79e-10	Chr8	22116684	22117184	501	*	5.42	6.4	-0.14	6.54	1.68e-07	4.8e-06	Distal Intergenic	11	22111063	22113871	2809	1	LOC_Os08g35090.1	5621	LOC_Os08g35090.1	LOC_Os08g35090	5621	None	OsSub56 - Putative Subtilisin homologue, expressed
LOC_Os08g36320	1400.76	881.805	-0.669	4.076e-17	Chr8	22882221	22882721	501	*	6.81	7.42	5.75	1.68	0.000359	0.00294	Promoter (<=1kb)	11	22878668	22882730	4063	2	LOC_Os08g36320.1	9	LOC_Os08g36320.1;LOC_Os08g36320.3;LOC_Os08g36320.2;LOC_Os08g36320.4;LOC_Os08g36320.5	LOC_Os08g36320;LOC_Os08g36320;LOC_Os08g36320;LOC_Os08g36320;LOC_Os08g36320	0;0;0;0;0	Os08g0465800	decarboxylase, putative, expressed	OsGAD1	root|seed|shoot	Rice (Oryza sativa) contains a novel isoform of glutamate decarboxylase that lacks an authentic calmodulin-binding domain at the C-terminus
LOC_Os08g36910	86.446	34.024	-1.344	6.522e-06	Chr8	23342069	23342569	501	*	6.96	7.44	6.22	1.22	0.00243	0.0138	Exon (LOC_Os08g36910.1/LOC_Os08g36910, exon 2 of 3)	11	23340676	23343533	2858	1	LOC_Os08g36910.3	1393	LOC_Os08g36910.1;LOC_Os08g36910.2;LOC_Os08g36910.3	LOC_Os08g36910;LOC_Os08g36910;LOC_Os08g36910	0;0;0	Os08g0473900	alpha-amylase precursor, putative, expressed	alphaAmy3|OsAmy3D|RAmy3D	seed	Structural organization and differential expression of rice alpha-amylase genes
LOC_Os08g36910	86.446	34.024	-1.344	6.522e-06	Chr8	23344047	23344547	501	*	6.05	6.77	4.55	2.22	6.7e-06	9.46e-05	Distal Intergenic	11	23340676	23343533	2858	1	LOC_Os08g36910.3	3371	LOC_Os08g36910.1;LOC_Os08g36910.2;LOC_Os08g36910.3	LOC_Os08g36910;LOC_Os08g36910;LOC_Os08g36910	0;0;0	Os08g0473900	alpha-amylase precursor, putative, expressed	alphaAmy3|OsAmy3D|RAmy3D	seed	Structural organization and differential expression of rice alpha-amylase genes
LOC_Os08g37010	41.714	18.797	-1.158	0.02423	Chr8	23403075	23403575	501	*	6.76	7.35	5.75	1.6	1.55e-05	0.000196	Exon (LOC_Os08g37010.1/LOC_Os08g37010, exon 1 of 1)	11	23403049	23404344	1296	2	LOC_Os08g37010.1	769	LOC_Os08g36994.1;LOC_Os08g36994.2;LOC_Os08g37010.1;LOC_Os08g37020.1	LOC_Os08g36994;LOC_Os08g36994;LOC_Os08g37010;LOC_Os08g37020	12398;12398;0;0	Os08g0474866	gibberellin receptor GID1L2, putative, expressed
LOC_Os08g38080	9.982	1.819	-2.447	0.0309	Chr8	24121786	24122286	501	*	5.51	6.41	2.56	3.85	4.33e-05	0.000478	Promoter (<=1kb)	11	24121860	24123906	2047	1	LOC_Os08g38080.1	0	LOC_Os08g38080.1;LOC_Os08g38086.4;LOC_Os08g38086.3	LOC_Os08g38080;LOC_Os08g38086;LOC_Os08g38086	0;7202;7202	Os08g0487700	helix-loop-helix DNA-binding domain containing protein, expressed
LOC_Os08g38092	168.213	111.265	-0.592	0.004467	Chr8	24134146	24134646	501	*	5.29	6.27	-0.14	6.41	1.18e-07	3.69e-06	Promoter (<=1kb)	11	24129928	24134716	4789	2	LOC_Os08g38092.1	70	LOC_Os08g38092.1;LOC_Os08g38100.1	LOC_Os08g38092;LOC_Os08g38100	0;-2624	Os08g0487900	abhydrolase domain-containing protein FAM108C1, putative, expressed
LOC_Os08g38130	76.315	47.69	-0.681	0.03919	Chr8	24159342	24159842	501	*	5.84	6.73	3.07	3.66	0.000156	0.00146	Promoter (<=1kb)	11	24158576	24159852	1277	2	LOC_Os08g38130.1	10	LOC_Os08g38120.1;LOC_Os08g38130.1;LOC_Os08g38140.1;LOC_Os08g38150.1	LOC_Os08g38120;LOC_Os08g38130;LOC_Os08g38140;LOC_Os08g38150	0;0;0;0	Os08g0488800	cytokinin-O-glucosyltransferase 1, putative, expressed
LOC_Os08g38270	134.835	67.387	-1.002	0.0002387	Chr8	24253338	24253838	501	*	5.22	6.14	2.06	4.08	1.33e-05	0.000171	3' UTR	11	24252684	24253935	1252	1	LOC_Os08g38270.1	654	LOC_Os08g38260.1;LOC_Os08g38270.1;LOC_Os08g38280.1	LOC_Os08g38260;LOC_Os08g38270;LOC_Os08g38280	0;0;0	Os08g0490600	fasciclin domain containing protein, expressed
LOC_Os08g38990	874.149	478	-0.869	2.026e-16	Chr8	24646024	24646524	501	*	5.11	6.09	-0.14	6.23	3.81e-07	8.81e-06	3' UTR	11	24645860	24649085	3226	2	LOC_Os08g38990.3	2561	LOC_Os08g38980.1;LOC_Os08g38990.3;LOC_Os08g38990.1;LOC_Os08g38990.4;LOC_Os08g38990.2	LOC_Os08g38980;LOC_Os08g38990;LOC_Os08g38990;LOC_Os08g38990;LOC_Os08g38990	7014;0;0;0;0	Os08g0499300	WRKY30, expressed	OsWRKY30	drought|drought tolerance| ja	OsWRKY30 is activated by MAP kinases to confer drought tolerance in rice|A comprehensive expression analysis of the WRKY gene superfamily in rice plants during defense response
LOC_Os08g39500	291.276	163.412	-0.84	3.353e-07	Chr8	24996246	24996746	501	*	5.37	6.31	1.54	4.77	4.47e-07	9.98e-06	Promoter (1-2kb)	11	24992919	24994506	1588	2	LOC_Os08g39500.1	-1740	LOC_Os08g39500.1;LOC_Os08g39510.1	LOC_Os08g39500;LOC_Os08g39510	-1740;0	Os08g0505300	60S ribosomal protein L31, putative, expressed
LOC_Os08g39550	226.654	95.5	-1.245	6.55e-11	Chr8	25017789	25018289	501	*	5.81	6.39	4.84	1.55	0.00178	0.0108	Promoter (<=1kb)	11	25015691	25017363	1673	2	LOC_Os08g39550.1	-426	LOC_Os08g39550.1	LOC_Os08g39550	0	Os08g0505900	polygalacturonase inhibitor 2 precursor, putative, expressed
LOC_Os08g39850	324.995	188.3	-0.788	5.468e-08	Chr8	25241044	25241544	501	*	6.83	7.45	5.72	1.72	3.79e-06	5.82e-05	5' UTR	11	25240906	25250046	9141	1	LOC_Os08g39850.1	138	LOC_Os08g39850.3;LOC_Os08g39850.1;LOC_Os08g39850.4;LOC_Os08g39850.2	LOC_Os08g39850;LOC_Os08g39850;LOC_Os08g39850;LOC_Os08g39850	0;0;0;0	Os08g0509100	lipoxygenase, chloroplast precursor, putative, expressed
LOC_Os08g39850	324.995	188.3	-0.788	5.468e-08	Chr8	25245686	25246186	501	*	6.44	7	5.49	1.51	0.000158	0.00147	3' UTR	11	25244414	25250279	5866	1	LOC_Os08g39850.2	1272	LOC_Os08g39850.3;LOC_Os08g39850.1;LOC_Os08g39850.4;LOC_Os08g39850.2	LOC_Os08g39850;LOC_Os08g39850;LOC_Os08g39850;LOC_Os08g39850	0;0;0;0	Os08g0509100	lipoxygenase, chloroplast precursor, putative, expressed
LOC_Os08g39860	1939.54	1010.31	-0.94	6.345e-35	Chr8	25250609	25251109	501	*	5.25	5.95	3.87	2.07	0.0013	0.00846	3' UTR	11	25250314	25254656	4343	2	LOC_Os08g39860.1	3547	LOC_Os08g39850.1;LOC_Os08g39850.4;LOC_Os08g39850.2;LOC_Os08g39860.1;LOC_Os08g39860.2	LOC_Os08g39850;LOC_Os08g39850;LOC_Os08g39850;LOC_Os08g39860;LOC_Os08g39860	0;0;0;0;0	Os08g0509200	Os8bglu27 - beta-glucosidase homologue, similar to Os4bglu12 exoglucanase, expressed
LOC_Os08g39860	1939.54	1010.31	-0.94	6.345e-35	Chr8	25251493	25251993	501	*	5.56	6.41	3.16	3.25	1.03e-05	0.000137	Exon (LOC_Os08g39860.1/LOC_Os08g39860, exon 9 of 13)	11	25250314	25254656	4343	2	LOC_Os08g39860.1	2663	LOC_Os08g39850.1;LOC_Os08g39850.4;LOC_Os08g39850.2;LOC_Os08g39860.1;LOC_Os08g39860.2	LOC_Os08g39850;LOC_Os08g39850;LOC_Os08g39850;LOC_Os08g39860;LOC_Os08g39860	0;0;0;0;0	Os08g0509200	Os8bglu27 - beta-glucosidase homologue, similar to Os4bglu12 exoglucanase, expressed
LOC_Os08g39870	697.803	389.7	-0.839	4.254e-15	Chr8	25267295	25267795	501	*	5.74	6.34	4.7	1.64	0.00182	0.011	Promoter (<=1kb)	11	25260124	25266935	6812	2	LOC_Os08g39870.1	-360	LOC_Os08g39870.1;LOC_Os08g39880.1	LOC_Os08g39870;LOC_Os08g39880	0;0	Os08g0509400	Os8bglu28 - beta-glucosidase homologue, similar to Os4bglu12 exoglucanase, expressed
LOC_Os08g39870	697.803	389.7	-0.839	4.254e-15	Chr8	25266419	25266919	501	*	4.94	5.77	2.81	2.96	0.00621	0.0285	Promoter (<=1kb)	11	25260124	25266935	6812	2	LOC_Os08g39870.1	16	LOC_Os08g39870.1	LOC_Os08g39870	0	Os08g0509400	Os8bglu28 - beta-glucosidase homologue, similar to Os4bglu12 exoglucanase, expressed
LOC_Os08g41280	1045.39	476.347	-1.135	1.677e-28	Chr8	26077962	26078462	501	*	5.32	6.24	2.14	4.1	4.9e-05	0.000533	Distal Intergenic	11	26072176	26074779	2604	2	LOC_Os08g41280.1	-3183				Os08g0524200	membrane protein, putative, expressed
LOC_Os08g41280	1045.39	476.347	-1.135	1.677e-28	Chr8	26079075	26079575	501	*	4.88	5.85	-0.14	5.99	1.47e-06	2.65e-05	Distal Intergenic	11	26072176	26074779	2604	2	LOC_Os08g41280.1	-4296				Os08g0524200	membrane protein, putative, expressed
LOC_Os08g41880	2792	950.256	-1.554	3.277e-111	Chr8	26443262	26443762	501	*	5.34	6.32	-0.14	6.46	6.43e-08	2.39e-06	Exon (LOC_Os08g41880.1/LOC_Os08g41880, exon 7 of 10)	11	26439584	26445474	5891	1	LOC_Os08g41880.1	3678	LOC_Os08g41880.1	LOC_Os08g41880	0	Os08g0531000	nucleotide pyrophosphatase/phosphodiesterase, putative, expressed	NPP1|OsPAP27b	chloroplast	Rice plastidial N-glycosylated nucleotide pyrophosphatase/phosphodiesterase is transported from the ER-golgi to the chloroplast through the secretory pathway
LOC_Os08g42720	280.856	151.343	-0.893	7.558e-08	Chr8	27027817	27028317	501	*	6.18	6.8	5.07	1.73	3.2e-05	0.000369	3' UTR	11	27027583	27032155	4573	2	LOC_Os08g42720.1	3838	LOC_Os08g42710.1;LOC_Os08g42720.1	LOC_Os08g42710;LOC_Os08g42720	0;0	Os08g0540000	solute carrier family 35 member F1, putative, expressed
LOC_Os08g43000	36.451	0.595	-5.902	9.977e-07	Chr8	27178723	27179223	501	*	5.43	6.32	2.62	3.7	8.18e-08	2.82e-06	Promoter (<=1kb)	11	27175631	27179263	3633	2	LOC_Os08g43000.1	40	LOC_Os08g43000.1;LOC_Os08g43010.1	LOC_Os08g43000;LOC_Os08g43010	0;0	Os08g0543050	CC-NBS-LRR, putative, expressed
LOC_Os08g43980	11.368	2.066	-2.434	0.03332	Chr8	27694017	27694517	501	*	4.63	5.61	-0.14	5.75	5.72e-06	8.27e-05	Promoter (<=1kb)	11	27693974	27694705	732	1	LOC_Os08g43980.1	43	LOC_Os08g43970.1;LOC_Os08g43980.1;LOC_Os08g44000.1	LOC_Os08g43970;LOC_Os08g43980;LOC_Os08g44000	1986;0;0	Os08g0553750	carrier, putative, expressed
LOC_Os08g44270	1428.44	787.489	-0.861	2.237e-24	Chr8	27875041	27875541	501	*	4.96	5.94	-0.14	6.08	8.93e-07	1.74e-05	Promoter (<=1kb)	11	27875142	27876599	1458	1	LOC_Os08g44270.1	0	LOC_Os08g44270.1;LOC_Os08g44280.1;LOC_Os08g44280.2	LOC_Os08g44270;LOC_Os08g44280;LOC_Os08g44280	0;-1802;-1802	Os08g0556900	vignain precursor, putative, expressed	OsSAG12-2	cell death|senescence	The rice OsSAG12-2 gene codes for a functional protease that negatively regulates stress-induced cell death.
LOC_Os08g44270	1428.44	787.489	-0.861	2.237e-24	Chr8	27875686	27876186	501	*	5.81	6.54	4.3	2.23	2.33e-05	0.000281	Exon (LOC_Os08g44270.1/LOC_Os08g44270, exon 1 of 1)	11	27875142	27876599	1458	1	LOC_Os08g44270.1	544	LOC_Os08g44270.1;LOC_Os08g44280.1;LOC_Os08g44280.2	LOC_Os08g44270;LOC_Os08g44280;LOC_Os08g44280	0;-1157;-1157	Os08g0556900	vignain precursor, putative, expressed	OsSAG12-2	cell death|senescence	The rice OsSAG12-2 gene codes for a functional protease that negatively regulates stress-induced cell death.
LOC_Os08g44870	1154.82	684.601	-0.753	1.38e-18	Chr8	28184797	28185297	501	*	6.29	6.85	5.36	1.48	0.000644	0.00478	Exon (LOC_Os08g44870.1/LOC_Os08g44870, exon 1 of 3)	11	28183816	28185866	2051	2	LOC_Os08g44870.1	569	LOC_Os08g44870.1;LOC_Os08g44870.3;LOC_Os08g44870.2;LOC_Os08g44880.1	LOC_Os08g44870;LOC_Os08g44870;LOC_Os08g44870;LOC_Os08g44880	0;0;0;2378	Os08g0562800	MATE efflux family protein, putative, expressed
LOC_Os09g02560	31.439	10.787	-1.541	0.00626	Chr9	1064553	1065053	501	*	6.49	6.99	5.73	1.26	0.00174	0.0106	Promoter (<=1kb)	12	1064176	1064888	713	2	LOC_Os09g02560.1	0	LOC_Os09g02550.1;LOC_Os09g02560.1	LOC_Os09g02550;LOC_Os09g02560	0;0	None	expressed protein
LOC_Os09g03630	71.347	39.491	-0.856	0.009923	Chr9	1821907	1822407	501	*	5.81	6.63	3.74	2.89	0.00724	0.0319	5' UTR	12	1814010	1822556	8547	2	LOC_Os09g03630.1	149	LOC_Os09g03630.1	LOC_Os09g03630	0	Os09g0123500	ankyrin, putative, expressed
LOC_Os09g09330	33.466	15.048	-1.151	0.02359	Chr9	4993401	4993901	501	*	6.08	6.59	5.29	1.3	0.0119	0.0462	5' UTR	12	4992062	4997389	5328	2	LOC_Os09g09330.2	3488	LOC_Os09g09320.2;LOC_Os09g09320.1;LOC_Os09g09330.1;LOC_Os09g09330.2	LOC_Os09g09320;LOC_Os09g09320;LOC_Os09g09330;LOC_Os09g09330	0;0;0;0	Os09g0266100	expressed protein
LOC_Os09g10340	346.714	81.916	-2.083	9.536e-37	Chr9	5641034	5641534	501	*	6.68	7.19	5.88	1.32	0.000565	0.00429	Downstream (1-2kb)	12	5643294	5645523	2230	2	LOC_Os09g10340.1	3989	LOC_Os09g10340.1	LOC_Os09g10340	0	Os09g0275400	cytochrome P450, putative, expressed
LOC_Os09g11005	34.854	14.404	-1.273	0.01749	Chr9	6090698	6091198	501	*	5.98	6.8	3.9	2.9	0.00608	0.028	Downstream (2-3kb)	12	6093906	6095176	1271	2	LOC_Os09g11005.1	3978	LOC_Os09g11005.1	LOC_Os09g11005	0	Os09g0282701	expressed protein
LOC_Os09g12660	103.501	66.401	-0.647	0.02296	Chr9	7249401	7249901	501	*	5.88	6.57	4.5	2.06	0.00133	0.00858	Promoter (<=1kb)	12	7245359	7249816	4458	2	LOC_Os09g12660.1	0	LOC_Os09g12660.1;LOC_Os09g12660.2;LOC_Os09g12670.1	LOC_Os09g12660;LOC_Os09g12660;LOC_Os09g12670	0;0;2486	Os09g0298200	glucose-1-phosphate adenylyltransferase large subunit, chloroplast precursor, putative, expressed	OsAPS1|OsAGPS1	seed development|leaf|seed	Gene expression of ADP-glucose pyrophosphorylase and starch contents in rice cultured cells are cooperatively regulated by sucrose and ABA|Identification of the ADP-glucose pyrophosphorylase isoforms essential for starch synthesis in the leaf and seed endosperm of rice (Oryza sativa L.)
LOC_Os09g20540	41.835	10.628	-1.984	2.926e-05	Chr9	12377184	12377684	501	*	5.11	6.08	0.49	5.59	1.38e-07	4.16e-06	Exon (LOC_Os09g20540.1/LOC_Os09g20540, exon 1 of 1)	12	12376933	12378162	1230	1	LOC_Os09g20540.1	251	LOC_Os09g20540.1	LOC_Os09g20540	0	Os09g0371600	expressed protein
LOC_Os09g20980	97.612	26.829	-1.867	7.091e-10	Chr9	12641154	12641654	501	*	5.03	5.9	2.53	3.36	0.000963	0.00665	Downstream (2-3kb)	12	12637640	12639373	1734	1	LOC_Os09g20980.1	3514	LOC_Os09g20980.1;LOC_Os09g20990.1	LOC_Os09g20980;LOC_Os09g20990	3514;8420	Os09g0376700	RING-H2 finger protein, putative, expressed
LOC_Os09g21380	115.084	42.765	-1.426	2.635e-07	Chr9	12911042	12911542	501	*	6.03	6.58	5.14	1.45	0.00124	0.00813	Promoter (2-3kb)	12	12913654	12914865	1212	1	LOC_Os09g21380.1	-2112	LOC_Os09g21380.1	LOC_Os09g21380	0	Os09g0381600	expressed protein
LOC_Os09g21380	115.084	42.765	-1.426	2.635e-07	Chr9	12914229	12914729	501	*	5.23	6.21	-0.14	6.35	2.62e-07	6.69e-06	3' UTR	12	12913654	12914865	1212	1	LOC_Os09g21380.1	575	LOC_Os09g21380.1;LOC_Os09g21390.1	LOC_Os09g21380;LOC_Os09g21390	0;4864	Os09g0381600	expressed protein
LOC_Os09g21460	469.267	200.329	-1.23	2.089e-19	Chr9	12974593	12975093	501	*	5.71	6.7	-0.14	6.84	2.04e-09	2.36e-07	Downstream (<1kb)	12	12975276	12977293	2018	2	LOC_Os09g21460.1	2200	LOC_Os09g21450.1;LOC_Os09g21460.1;LOC_Os09g21470.1	LOC_Os09g21450;LOC_Os09g21460;LOC_Os09g21470	-2688;2200;0	Os09g0382400	expressed protein
LOC_Os09g25000	42.405	14.931	-1.523	0.001139	Chr9	14934204	14934704	501	*	5.88	6.58	4.48	2.1	0.00109	0.00734	Distal Intergenic	12	14938230	14939886	1657	1	LOC_Os09g25000.1	-3526	LOC_Os09g24990.1	LOC_Os09g24990	0	Os09g0416900	spotted leaf 11, putative, expressed
LOC_Os09g25060	23.384	5.774	-2.016	0.003949	Chr9	14976513	14977013	501	*	5.5	6.49	-0.14	6.63	1.36e-08	8.12e-07	Exon (LOC_Os09g25060.1/LOC_Os09g25060, exon 2 of 2)	12	14975932	14977713	1782	2	LOC_Os09g25060.1	700	LOC_Os09g25050.1;LOC_Os09g25060.1	LOC_Os09g25050;LOC_Os09g25060	5165;0	Os09g0417600	WRKY76, expressed	OsWRKY76	disease resistance|cold tolerance|temperature|transcription factor|blast|magnaporthe oryzae|blast disease|abiotic stress|disease|resistance|defense|salicylic acid|jasmonic|jasmonic acid| sa |SA	WRKY76 is a rice transcriptional repressor playing opposite roles in blast disease resistance and cold stress tolerance|OsWRKY28, a PAMP-responsive transrepressor, negatively regulates innate immune responses in rice against rice blast fungus|Metabolic and transcriptional alternations for defense by interfering OsWRKY62 and OsWRKY76 transcriptions in rice.
LOC_Os09g25100	116.553	45.664	-1.354	7.732e-06	Chr9	15027684	15028184	501	*	6.1	6.75	4.86	1.89	0.00399	0.0204	Exon (LOC_Os09g25100.1/LOC_Os09g25100, exon 1 of 1)	12	15027140	15028689	1550	1	LOC_Os09g25100.1	544	LOC_Os09g25100.1;LOC_Os09g25110.1	LOC_Os09g25100;LOC_Os09g25110	0;-2889	Os09g0418500	CAMK_KIN1/SNF1/Nim1_like.35 - CAMK includes calcium/calmodulin depedent protein kinases, expressed
LOC_Os09g25100	116.553	45.664	-1.354	7.732e-06	Chr9	15022540	15023040	501	*	4.97	5.87	2.14	3.73	0.000306	0.00257	Distal Intergenic	12	15027140	15028689	1550	1	LOC_Os09g25100.1	-4100				Os09g0418500	CAMK_KIN1/SNF1/Nim1_like.35 - CAMK includes calcium/calmodulin depedent protein kinases, expressed
LOC_Os09g25560	45.964	20.582	-1.16	0.005126	Chr9	15337607	15338107	501	*	6.28	6.76	5.55	1.21	0.00249	0.0141	Exon (LOC_Os09g25560.1/LOC_Os09g25560, exon 5 of 5)	12	15332945	15338884	5940	1	LOC_Os09g25560.1	4662	LOC_Os09g25560.1	LOC_Os09g25560	0	Os09g0423400	BT1 family protein, putative, expressed
LOC_Os09g25784	22.899	4.839	-2.249	0.002823	Chr9	15455578	15456078	501	*	6.81	7.29	6.1	1.19	0.00261	0.0146	Promoter (<=1kb)	12	15450531	15456012	5482	2	LOC_Os09g25784.1	0	LOC_Os09g25784.1;LOC_Os09g25784.2;LOC_Os09g25800.1	LOC_Os09g25784;LOC_Os09g25784;LOC_Os09g25800	0;0;0	Os09g0426100	auxin-induced protein 5NG4, putative, expressed
LOC_Os09g26300	64.219	37.847	-0.769	0.03209	Chr9	15892295	15892795	501	*	6.81	7.3	6.05	1.25	0.000264	0.00227	Exon (LOC_Os09g26300.1/LOC_Os09g26300, exon 1 of 1)	12	15891729	15892987	1259	2	LOC_Os09g26300.1	192	LOC_Os09g26290.1;LOC_Os09g26300.1	LOC_Os09g26290;LOC_Os09g26300	3398;0	Os09g0432900	hypro1, putative, expressed
LOC_Os09g26580	234.654	138.319	-0.761	1.66e-05	Chr9	16101648	16102148	501	*	4.37	5.26	1.56	3.7	0.000384	0.00312	3' UTR	12	16097465	16102821	5357	1	LOC_Os09g26580.1	4183	LOC_Os09g26580.1	LOC_Os09g26580	0	Os09g0436900	expressed protein
LOC_Os09g26580	234.654	138.319	-0.761	1.66e-05	Chr9	16102664	16103164	501	*	5.32	6.19	2.72	3.48	1.25e-06	2.3e-05	3' UTR	12	16097465	16102821	5357	1	LOC_Os09g26580.1	5199	LOC_Os09g26580.1	LOC_Os09g26580	0	Os09g0436900	expressed protein
LOC_Os09g26730	445.955	147.116	-1.603	2.554e-27	Chr9	16241605	16242105	501	*	6.54	7.06	5.7	1.37	0.00361	0.0189	Promoter (<=1kb)	12	16236438	16240793	4356	2	LOC_Os09g26730.1	-812	LOC_Os09g26730.1	LOC_Os09g26730	0	Os09g0438700	chaperonin, putative, expressed
LOC_Os09g26960	1257.74	799.4	-0.653	3.448e-15	Chr9	16382451	16382951	501	*	5.15	6.02	2.59	3.43	6.33e-06	9.01e-05	Distal Intergenic	12	16387701	16390415	2715	1	LOC_Os09g26960.1	-4750				Os09g0441400	cytochrome P450, putative, expressed	EP	grain yield|yield|erect|grain|breeding|panicle	Identification and characterization of the erect-pose panicle gene EP conferring high grain yield in rice (Oryza sativa L.)
LOC_Os09g26960	1257.74	799.4	-0.653	3.448e-15	Chr9	16389599	16390099	501	*	6.37	6.9	5.53	1.37	0.0118	0.0457	Exon (LOC_Os09g26960.1/LOC_Os09g26960, exon 2 of 2)	12	16387701	16390415	2715	1	LOC_Os09g26960.1	1898	LOC_Os09g26960.1;LOC_Os09g26970.1	LOC_Os09g26960;LOC_Os09g26970	0;0	Os09g0441400	cytochrome P450, putative, expressed	EP	grain yield|yield|erect|grain|breeding|panicle	Identification and characterization of the erect-pose panicle gene EP conferring high grain yield in rice (Oryza sativa L.)
LOC_Os09g26960	1257.74	799.4	-0.653	3.448e-15	Chr9	16383524	16384024	501	*	5.36	6.33	0.49	5.84	1.2e-08	7.48e-07	Distal Intergenic	12	16387701	16390415	2715	1	LOC_Os09g26960.1	-3677				Os09g0441400	cytochrome P450, putative, expressed	EP	grain yield|yield|erect|grain|breeding|panicle	Identification and characterization of the erect-pose panicle gene EP conferring high grain yield in rice (Oryza sativa L.)
LOC_Os09g26980	207.73	137.077	-0.604	0.001109	Chr9	16407451	16407951	501	*	6.51	7.24	4.96	2.28	0.000414	0.00331	Exon (LOC_Os09g26980.1/LOC_Os09g26980, exon 1 of 2)	12	16403633	16408074	4442	2	LOC_Os09g26980.1	123	LOC_Os09g26980.1	LOC_Os09g26980	0	Os09g0441700	cytochrome P450, putative, expressed
LOC_Os09g27500	21.33	5.358	-1.998	0.0044	Chr9	16713278	16713778	501	*	6.18	6.85	4.88	1.97	0.000466	0.00366	Promoter (<=1kb)	12	16710805	16713794	2990	2	LOC_Os09g27500.1	16	LOC_Os09g27500.1	LOC_Os09g27500	0	Os09g0447300	cytochrome P450, putative, expressed
LOC_Os09g27750	2460.67	1228.55	-1.002	5.28e-45	Chr9	16887166	16887666	501	*	5.59	6.24	4.34	1.9	0.012	0.0464	Promoter (<=1kb)	12	16886019	16887617	1599	2	LOC_Os09g27750.1	0	LOC_Os09g27744.1;LOC_Os09g27750.1;LOC_Os09g27760.1	LOC_Os09g27744;LOC_Os09g27750;LOC_Os09g27760	0;0;-2856	Os09g0451000	1-aminocyclopropane-1-carboxylate oxidase 1, putative, expressed	OsACO2
LOC_Os09g27820	697.138	290.321	-1.263	1.269e-30	Chr9	16926282	16926782	501	*	6.01	6.64	4.89	1.75	0.00212	0.0124	3' UTR	12	16925457	16927082	1626	1	LOC_Os09g27820.1	825	LOC_Os09g27810.1;LOC_Os09g27820.1	LOC_Os09g27810;LOC_Os09g27820	-2703;0	Os09g0451400	1-aminocyclopropane-1-carboxylate oxidase protein, putative, expressed	OsACO1	ethylene|abiotic stress|biotic stress	OsEIL1, a rice homolog of the Arabidopsis EIN3 regulates the ethylene response as a positive component|Identification and analysis of the mechanism underlying heat-inducible expression of rice aconitase 1.
LOC_Os09g28640	1187.94	736.828	-0.69	2.771e-16	Chr9	17422579	17423079	501	*	5.26	6.17	2.14	4.03	2.74e-05	0.000322	Distal Intergenic	12	17421207	17422450	1244	1	LOC_Os09g28640.1	1372	LOC_Os09g28640.1;LOC_Os09g28650.1	LOC_Os09g28640;LOC_Os09g28650	0;0	Os09g0460500	gibberellin receptor GID1L2, putative, expressed
LOC_Os09g29390	153.859	102.4	-0.585	0.007393	Chr9	17841042	17841542	501	*	6.19	7	4.16	2.84	3.93e-10	7.99e-08	Promoter (1-2kb)	12	17843407	17844736	1330	1	LOC_Os09g29390.1	-1865	LOC_Os09g29390.1	LOC_Os09g29390	0	Os09g0469300	plastocyanin-like domain containing protein, putative, expressed
LOC_Os09g29390	153.859	102.4	-0.585	0.007393	Chr9	17843878	17844378	501	*	6.24	6.97	4.66	2.31	3.37e-06	5.27e-05	3' UTR	12	17843407	17844736	1330	1	LOC_Os09g29390.1	471	LOC_Os09g29390.1	LOC_Os09g29390	0	Os09g0469300	plastocyanin-like domain containing protein, putative, expressed
LOC_Os09g29390	153.859	102.4	-0.585	0.007393	Chr9	17851417	17851917	501	*	5.78	6.77	-0.14	6.91	1.21e-09	1.66e-07	3' UTR	12	17843407	17844736	1330	1	LOC_Os09g29390.1	8010	LOC_Os09g29404.3;LOC_Os09g29404.2	LOC_Os09g29404;LOC_Os09g29404	0;0	Os09g0469300	plastocyanin-like domain containing protein, putative, expressed
LOC_Os09g30250	32.97	14.476	-1.169	0.03081	Chr9	18416426	18416926	501	*	5.3	5.99	3.93	2.06	0.00287	0.0157	Exon (LOC_Os09g30250.1/LOC_Os09g30250, exon 5 of 11)	12	18414043	18422769	8727	1	LOC_Os09g30250.1	2383	LOC_Os09g30250.1	LOC_Os09g30250	0	Os09g0479900	OsSub58 - Putative Subtilisin homologue, expressed
LOC_Os09g30340	65905.3	43194.6	-0.61	3.252e-14	Chr9	18469579	18470079	501	*	4.96	5.91	0.93	4.98	2.37e-06	3.92e-05	Promoter (<=1kb)	12	18469702	18471297	1596	1	LOC_Os09g30340.1	0	LOC_Os09g30330.1;LOC_Os09g30350.1;LOC_Os09g30340.1	LOC_Os09g30330;LOC_Os09g30350;LOC_Os09g30340	4630;0;0	Os09g0481200	photosystem I reaction center subunit, chloroplast precursor, putative, expressed
LOC_Os09g31180	5580.36	3573.38	-0.644	6.81e-23	Chr9	18751807	18752307	501	*	6.07	6.56	5.34	1.22	0.00355	0.0186	3' UTR	12	18751895	18754232	2338	2	LOC_Os09g31180.1	1925	LOC_Os09g31170.1;LOC_Os09g31180.1;LOC_Os09g31180.2;LOC_Os09g31190.1	LOC_Os09g31170;LOC_Os09g31180;LOC_Os09g31180;LOC_Os09g31190	0;0;0;-2323	Os09g0485900	ribosomal protein L6, putative, expressed
LOC_Os09g31280	437.864	269.788	-0.697	2.163e-07	Chr9	18808741	18809241	501	*	6.09	6.84	4.46	2.38	0.00357	0.0187	3' UTR	12	18805788	18808749	2962	1	LOC_Os09g31280.2	2953	LOC_Os09g31280.1;LOC_Os09g31280.2;LOC_Os09g31290.1	LOC_Os09g31280;LOC_Os09g31280;LOC_Os09g31290	0;0;3650	Os09g0487700	OTU-like cysteine protease family protein, putative, expressed
LOC_Os09g32470	244.339	39.051	-2.642	1.04e-35	Chr9	19386665	19387165	501	*	6	6.61	4.94	1.68	0.00123	0.00809	Promoter (<=1kb)	12	19384605	19387021	2417	2	LOC_Os09g32470.1	0	LOC_Os09g32470.1;LOC_Os09g32480.1	LOC_Os09g32470;LOC_Os09g32480	0;0	Os09g0500900	membrane protein, putative, expressed
LOC_Os09g32500	289.046	159.755	-0.86	5.428e-06	Chr9	19402289	19402789	501	*	4.74	5.72	-0.14	5.86	2.34e-05	0.000282	Distal Intergenic	12	19398925	19401072	2148	1	LOC_Os09g32500.2	3364	LOC_Os09g32500.1;LOC_Os09g32500.2	LOC_Os09g32500;LOC_Os09g32500	0;0	Os09g0501200	60S ribosomal protein L32, putative, expressed
LOC_Os09g33490	189.047	112.127	-0.749	0.000124	Chr9	19749454	19749954	501	*	5.37	6.35	-0.14	6.49	6.59e-08	2.44e-06	Exon (LOC_Os09g33490.1/LOC_Os09g33490, exon 1 of 3)	12	19749085	19750944	1860	1	LOC_Os09g33490.1	369	LOC_Os09g33490.1;LOC_Os09g33500.1	LOC_Os09g33490;LOC_Os09g33500	0;-2757	Os09g0509100	no apical meristem protein, putative, expressed
LOC_Os09g34320	2318.78	949.498	-1.289	9.714e-56	Chr9	20260980	20261480	501	*	4.84	5.82	-0.14	5.96	1.76e-06	3.07e-05	Promoter (<=1kb)	12	20258416	20260196	1781	2	LOC_Os09g34320.1	-784	LOC_Os09g34320.1	LOC_Os09g34320	0	Os09g0518900	expressed protein
LOC_Os09g35600	263.609	143.591	-0.874	4.616e-07	Chr9	20465039	20465539	501	*	7.23	7.67	6.58	1.09	0.0103	0.0414	Distal Intergenic	12	20469822	20471447	1626	2	LOC_Os09g35600.1	5908				Os09g0524300	MATE domain containing protein, expressed
LOC_Os09g35600	263.609	143.591	-0.874	4.616e-07	Chr9	20470717	20471217	501	*	6.28	6.93	5.07	1.86	0.00211	0.0124	Exon (LOC_Os09g35600.1/LOC_Os09g35600, exon 1 of 1)	12	20469822	20471447	1626	2	LOC_Os09g35600.1	230	LOC_Os09g35600.1	LOC_Os09g35600	0	Os09g0524300	MATE domain containing protein, expressed
LOC_Os09g35630	146.177	66.464	-1.144	1.325e-06	Chr9	20492874	20493374	501	*	5.36	6.19	3.18	3.01	0.00588	0.0273	Downstream (<1kb)	12	20494054	20496911	2858	2	LOC_Os09g35630.1	3537	LOC_Os09g35630.1	LOC_Os09g35630	3537	Os09g0524800	BAG domain-containing protein, putative, expressed
LOC_Os09g35730	940.619	568.507	-0.727	1.313e-14	Chr9	20552452	20552952	501	*	6.33	7.13	4.4	2.73	2.04e-07	5.56e-06	5' UTR	12	20549805	20553307	3503	2	LOC_Os09g35730.1	355	LOC_Os09g35730.1	LOC_Os09g35730	0	Os09g0525900	OsRhmbd16 - Putative Rhomboid homologue, expressed
LOC_Os09g37050	10.221	1.506	-2.756	0.01811	Chr9	21370999	21371499	501	*	5.46	6.33	2.98	3.35	0.00115	0.00768	Exon (LOC_Os09g37050.1/LOC_Os09g37050, exon 4 of 5)	12	21370609	21372376	1768	2	LOC_Os09g37050.1	877	LOC_Os09g37040.1;LOC_Os09g37050.1	LOC_Os09g37040;LOC_Os09g37050	4608;0	Os09g0542600	RING-H2 finger protein ATL2B, putative, expressed
LOC_Os09g37050	10.221	1.506	-2.756	0.01811	Chr9	21372114	21372614	501	*	6.11	6.59	5.36	1.23	0.009	0.0376	Promoter (<=1kb)	12	21370609	21372376	1768	2	LOC_Os09g37050.1	0	LOC_Os09g37040.1;LOC_Os09g37050.1	LOC_Os09g37040;LOC_Os09g37050	5723;0	Os09g0542600	RING-H2 finger protein ATL2B, putative, expressed
LOC_Os09g37344	79.239	20.196	-1.978	3.395e-09	Chr9	21568155	21568655	501	*	4.61	5.45	2.29	3.16	0.00556	0.0262	Promoter (<=1kb)	12	21568288	21570887	2600	1	LOC_Os09g37344.1	0	LOC_Os09g37330.1;LOC_Os09g37340.1;LOC_Os09g37344.1;LOC_Os09g37350.1	LOC_Os09g37330;LOC_Os09g37340;LOC_Os09g37344;LOC_Os09g37350	-1595;494;0;1227	Os09g0545400	expressed protein
LOC_Os09g38239	238.292	56.326	-2.086	1.562e-23	Chr9	22018163	22018663	501	*	5.29	6.28	-0.14	6.42	5.04e-07	1.1e-05	Distal Intergenic	12	22013749	22015250	1502	1	LOC_Os09g38239.1	4414	LOC_Os09g38239.1	LOC_Os09g38239	0	Os09g0555150	sulfotransferase domain containing protein, expressed
LOC_Os09g38239	238.292	56.326	-2.086	1.562e-23	Chr9	22013755	22014255	501	*	5.33	6.32	-0.14	6.46	8.11e-08	2.8e-06	Promoter (<=1kb)	12	22013749	22015250	1502	1	LOC_Os09g38239.1	6	LOC_Os09g38239.1	LOC_Os09g38239	0	Os09g0555150	sulfotransferase domain containing protein, expressed
LOC_Os09g38330	217.027	137.251	-0.66	0.0007736	Chr9	22057402	22057902	501	*	5.94	6.41	5.23	1.18	0.0115	0.0449	Promoter (<=1kb)	12	22048464	22057029	8566	2	LOC_Os09g38330.1	-373	LOC_Os09g38330.1	LOC_Os09g38330	-373	Os09g0555600	MORN repeat domain containing protein, expressed
LOC_Os09g39570	187.636	118.812	-0.655	0.001355	Chr9	22711954	22712454	501	*	5.38	6.37	-0.14	6.51	6.73e-08	2.48e-06	Promoter (<=1kb)	12	22713280	22717110	3831	1	LOC_Os09g39570.1	-826	LOC_Os09g39560.1;LOC_Os09g39570.1	LOC_Os09g39560;LOC_Os09g39570	0;0	Os09g0569200	beta-amylase, putative, expressed
LOC_Os10g02220	746.682	497.91	-0.586	4.116e-09	Chr10	779660	780160	501	*	6.81	7.44	5.66	1.78	0.00732	0.0322	Downstream (2-3kb)	2	771679	776347	4669	2	LOC_Os10g02220.5	-3313	LOC_Os10g02230.1	LOC_Os10g02230	0	Os10g0110800	peptide transporter PTR2, putative, expressed
LOC_Os10g02880	51.439	7.522	-2.767	5.903e-09	Chr10	1163838	1164338	501	*	7.22	7.81	6.22	1.59	0.00285	0.0157	Exon (LOC_Os10g02880.1/LOC_Os10g02880, exon 1 of 2)	2	1162912	1164485	1574	2	LOC_Os10g02880.1	147	LOC_Os10g02870.1;LOC_Os10g02880.1	LOC_Os10g02870;LOC_Os10g02880	0;0	Os10g0118200	O-methyltransferase, putative, expressed
LOC_Os10g04170	47.93	20.957	-1.201	0.003975	Chr10	1938547	1939047	501	*	5.53	6.34	3.51	2.83	0.0103	0.0414	Promoter (<=1kb)	2	1938511	1945416	6906	1	LOC_Os10g04170.1	36	LOC_Os10g04170.1	LOC_Os10g04170	0	None	expressed protein
LOC_Os10g05720	84.739	4.295	-4.317	2.636e-18	Chr10	2884435	2884935	501	*	4.68	5.65	-0.14	5.79	1.45e-05	0.000185	Promoter (<=1kb)	2	2885293	2886579	1287	1	LOC_Os10g05720.1	-358	LOC_Os10g05710.1;LOC_Os10g05730.1;LOC_Os10g05720.1;LOC_Os10g05720.2;LOC_Os10g05730.2	LOC_Os10g05710;LOC_Os10g05730;LOC_Os10g05720;LOC_Os10g05720;LOC_Os10g05730	8469;0;-358;-529;0	Os10g0148000	LTPL37 - Protease inhibitor/seed storage/LTP family protein precursor, expressed	OsDIL|OsLTP6	drought|pollen| ABA |anther|drought tolerance|fertility|anther development|tapetal|vegetative|yield|tapetum|abiotic stress|reproductive|drought resistance	The rice OsDIL gene plays a role in drought tolerance at vegetative and reproductive stages|The rice OsLTP6 gene promoter directs anther-specific expression by a combination of positive and negative regulatory elements
LOC_Os10g11310	219.31	131.63	-0.738	2.7e-05	Chr10	6272908	6273408	501	*	6.04	6.73	4.67	2.06	0.00287	0.0158	3' UTR	2	6272649	6276718	4070	2	LOC_Os10g11310.1	3310	LOC_Os10g11310.3;LOC_Os10g11310.1;LOC_Os10g11310.2	LOC_Os10g11310;LOC_Os10g11310;LOC_Os10g11310	0;0;0	Os10g0190500	expressed protein
LOC_Os10g11310	219.31	131.63	-0.738	2.7e-05	Chr10	6274405	6274905	501	*	5.87	6.76	3.07	3.69	8.13e-05	0.000825	Exon (LOC_Os10g11310.1/LOC_Os10g11310, exon 4 of 5)	2	6272649	6276718	4070	2	LOC_Os10g11310.1	1813	LOC_Os10g11310.3;LOC_Os10g11310.1;LOC_Os10g11310.2	LOC_Os10g11310;LOC_Os10g11310;LOC_Os10g11310	0;0;0	Os10g0190500	expressed protein
LOC_Os10g13914	350.122	218.938	-0.677	1.349e-06	Chr10	7557363	7557863	501	*	6.38	7.01	5.24	1.77	0.000612	0.00458	Promoter (<=1kb)	2	7557319	7564160	6842	1	LOC_Os10g13914.1	44	LOC_Os10g13900.1;LOC_Os10g13914.1	LOC_Os10g13900;LOC_Os10g13914	0;0	Os10g0206500	POEI27 - Pollen Ole e I allergen and extensin family protein precursor, expressed
LOC_Os10g21800	32.192	14.604	-1.15	0.0277	Chr10	11188421	11188921	501	*	4.81	5.65	2.56	3.08	0.00505	0.0244	Exon (LOC_Os10g21800.1/LOC_Os10g21800, exon 2 of 2)	2	11186975	11188483	1509	1	LOC_Os10g21800.1	1446	LOC_Os10g21790.1;LOC_Os10g21800.1;LOC_Os10g21810.2	LOC_Os10g21790;LOC_Os10g21800;LOC_Os10g21810	0;0;14711	None	leucine-rich repeat family protein, putative, expressed
LOC_Os10g22720	162.817	101.427	-0.679	0.001454	Chr10	11801123	11801623	501	*	4.46	5.43	-0.14	5.57	1.42e-05	0.000181	Promoter (<=1kb)	2	11801229	11805344	4116	1	LOC_Os10g22720.1	0	LOC_Os10g22710.1;LOC_Os10g22720.1	LOC_Os10g22710;LOC_Os10g22720	-2857;0	Os10g0372700	expressed protein
LOC_Os10g22720	162.817	101.427	-0.679	0.001454	Chr10	11804037	11804537	501	*	6.4	6.9	5.61	1.29	0.0129	0.0489	Exon (LOC_Os10g22720.1/LOC_Os10g22720, exon 2 of 3)	2	11801229	11805344	4116	1	LOC_Os10g22720.1	2808	LOC_Os10g22720.1;LOC_Os10g22730.1;LOC_Os10g22730.2;LOC_Os10g22730.3;LOC_Os10g22730.4	LOC_Os10g22720;LOC_Os10g22730;LOC_Os10g22730;LOC_Os10g22730;LOC_Os10g22730	0;8696;8696;8696;8696	Os10g0372700	expressed protein
LOC_Os10g26410	16.813	3.326	-2.347	0.004939	Chr10	13722358	13722858	501	*	7	7.43	6.37	1.06	0.00832	0.0354	Promoter (<=1kb)	2	13722352	13722732	381	2	LOC_Os10g26410.1	0	LOC_Os10g26410.1	LOC_Os10g26410	0	Os10g0403800	bHLH family protein, putative, expressed
LOC_Os10g28050	1015.17	671.326	-0.596	1.149e-11	Chr10	14560944	14561444	501	*	7.38	7.89	6.59	1.3	0.000676	0.00497	Exon (LOC_Os10g28060.1/LOC_Os10g28060, exon 2 of 2)	2	14558959	14560336	1378	1	LOC_Os10g28050.1	1985	LOC_Os10g28050.1;LOC_Os10g28060.1	LOC_Os10g28050;LOC_Os10g28060	0;0	Os10g0416100	chitinase 2, putative, expressed
LOC_Os10g28860	7.333	0.622	-3.584	0.02734	Chr10	15044042	15044542	501	*	7.25	7.69	6.6	1.09	0.00413	0.0209	Promoter (<=1kb)	2	15044042	15045403	1362	1	LOC_Os10g28860.1	0	LOC_Os10g28860.1;LOC_Os10g28870.1	LOC_Os10g28860;LOC_Os10g28870	0;0	Os10g0424400	MBTB39 - Bric-a-Brac, Tramtrack, Broad Complex BTB domain with Meprin and TRAF Homology MATH domain, expressed
LOC_Os10g30870	8211.6	4636.33	-0.825	3.224e-36	Chr10	16097742	16098242	501	*	6.79	7.39	5.75	1.63	5.17e-05	0.000558	Exon (LOC_Os10g30870.1/LOC_Os10g30870, exon 1 of 1)	2	16096316	16098550	2235	2	LOC_Os10g30870.1	308	LOC_Os10g30860.1;LOC_Os10g30870.1	LOC_Os10g30860;LOC_Os10g30870	4969;0	Os10g0445600	expressed protein
LOC_Os10g32980	1523.05	876.84	-0.798	1.838e-23	Chr10	17267190	17267690	501	*	6.23	6.81	5.24	1.56	0.00351	0.0185	3' UTR	2	17261952	17266613	4662	1	LOC_Os10g32980.1	5238	LOC_Os10g32980.1;LOC_Os10g32990.1	LOC_Os10g32980;LOC_Os10g32990	0;0	Os10g0467800	CESA7 - cellulose synthase, expressed	OsCesA7	cellulose|transcription factor|lignin|lignin biosynthesis|vascular bundle|growth|culm|zinc|plant growth	Three Distinct Rice Cellulose Synthase Catalytic Subunit Genes Required for Cellulose Synthesis in the Secondary Wall|The expression of a rice secondary wall-specific cellulose synthase gene, OsCesA7, is directly regulated by a rice transcription factor, OsMYB58/63.|A Missense Mutation in the Zinc Finger Domain of OsCESA7 Deleteriously Affects Cellulose Biosynthesis and Plant Growth in Rice.
LOC_Os10g32980	1523.05	876.84	-0.798	1.838e-23	Chr10	17264727	17265227	501	*	6.15	6.88	4.57	2.31	0.00249	0.0141	Exon (LOC_Os10g32980.1/LOC_Os10g32980, exon 7 of 9)	2	17261952	17266613	4662	1	LOC_Os10g32980.1	2775	LOC_Os10g32980.1;LOC_Os10g32990.1	LOC_Os10g32980;LOC_Os10g32990	0;0	Os10g0467800	CESA7 - cellulose synthase, expressed	OsCesA7	cellulose|transcription factor|lignin|lignin biosynthesis|vascular bundle|growth|culm|zinc|plant growth	Three Distinct Rice Cellulose Synthase Catalytic Subunit Genes Required for Cellulose Synthesis in the Secondary Wall|The expression of a rice secondary wall-specific cellulose synthase gene, OsCesA7, is directly regulated by a rice transcription factor, OsMYB58/63.|A Missense Mutation in the Zinc Finger Domain of OsCESA7 Deleteriously Affects Cellulose Biosynthesis and Plant Growth in Rice.
LOC_Os10g32980	1523.05	876.84	-0.798	1.838e-23	Chr10	17261809	17262309	501	*	6.61	7.31	5.17	2.15	5.85e-09	4.6e-07	Promoter (<=1kb)	2	17261952	17266613	4662	1	LOC_Os10g32980.1	0	LOC_Os10g32970.1;LOC_Os10g32980.1	LOC_Os10g32970;LOC_Os10g32980	3643;0	Os10g0467800	CESA7 - cellulose synthase, expressed	OsCesA7	cellulose|transcription factor|lignin|lignin biosynthesis|vascular bundle|growth|culm|zinc|plant growth	Three Distinct Rice Cellulose Synthase Catalytic Subunit Genes Required for Cellulose Synthesis in the Secondary Wall|The expression of a rice secondary wall-specific cellulose synthase gene, OsCesA7, is directly regulated by a rice transcription factor, OsMYB58/63.|A Missense Mutation in the Zinc Finger Domain of OsCESA7 Deleteriously Affects Cellulose Biosynthesis and Plant Growth in Rice.
LOC_Os10g32980	1523.05	876.84	-0.798	1.838e-23	Chr10	17264028	17264528	501	*	5.67	6.48	3.63	2.85	0.0108	0.043	Exon (LOC_Os10g32980.1/LOC_Os10g32980, exon 6 of 9)	2	17261952	17266613	4662	1	LOC_Os10g32980.1	2076	LOC_Os10g32970.1;LOC_Os10g32980.1;LOC_Os10g32990.1	LOC_Os10g32970;LOC_Os10g32980;LOC_Os10g32990	5862;0;0	Os10g0467800	CESA7 - cellulose synthase, expressed	OsCesA7	cellulose|transcription factor|lignin|lignin biosynthesis|vascular bundle|growth|culm|zinc|plant growth	Three Distinct Rice Cellulose Synthase Catalytic Subunit Genes Required for Cellulose Synthesis in the Secondary Wall|The expression of a rice secondary wall-specific cellulose synthase gene, OsCesA7, is directly regulated by a rice transcription factor, OsMYB58/63.|A Missense Mutation in the Zinc Finger Domain of OsCESA7 Deleteriously Affects Cellulose Biosynthesis and Plant Growth in Rice.
LOC_Os10g33170	809.789	447.963	-0.856	4.988e-18	Chr10	17374580	17375080	501	*	5.71	6.4	4.38	2.02	0.00253	0.0142	Exon (LOC_Os10g33170.1/LOC_Os10g33170, exon 1 of 3)	2	17374444	17379041	4598	1	LOC_Os10g33170.1	136	LOC_Os10g33170.1	LOC_Os10g33170	0	Os10g0469900	POT domain containing peptide transporter, putative, expressed
LOC_Os10g33650	91.374	56.306	-0.697	0.01595	Chr10	17743698	17744198	501	*	5.5	6.49	-0.14	6.63	1.31e-08	7.97e-07	3' UTR	2	17739202	17744567	5366	1	LOC_Os10g33650.1	4496	LOC_Os10g33650.1;LOC_Os10g33650.2;LOC_Os10g33650.3;LOC_Os10g33660.1	LOC_Os10g33650;LOC_Os10g33650;LOC_Os10g33650;LOC_Os10g33660	0;0;0;5866	Os10g0476300	CK1_CaseinKinase_1.9 - CK1 includes the casein kinase 1 kinases, expressed	OsPUT3	chloroplast	Altered expression of polyamine transporters reveals a role for spermidine in the timing of flowering and other developmental response pathways.
LOC_Os10g33920	115.104	39.987	-1.513	1.225e-07	Chr10	18019996	18020496	501	*	4.86	5.79	1.54	4.25	1.7e-05	0.000213	Distal Intergenic	2	18011967	18018931	6965	1	LOC_Os10g33920.2	8029	LOC_Os10g33920.3;LOC_Os10g33920.1;LOC_Os10g33920.2	LOC_Os10g33920;LOC_Os10g33920;LOC_Os10g33920	0;0;0	Os10g0479700	transporter-related, putative, expressed
LOC_Os10g35040	85.553	44.026	-0.964	0.001454	Chr10	18698492	18698992	501	*	5.1	6.08	-0.14	6.22	3.29e-07	7.92e-06	Exon (LOC_Os10g35040.1/LOC_Os10g35040, exon 2 of 3)	2	18697593	18700089	2497	1	LOC_Os10g35040.1	899	LOC_Os10g35040.1;LOC_Os10g35050.1	LOC_Os10g35040;LOC_Os10g35050	0;0	Os10g0492400	receptor kinase like protein, putative, expressed
LOC_Os10g35300	35.874	15.77	-1.194	0.01761	Chr10	18875699	18876199	501	*	5.36	6.34	-0.14	6.48	4.9e-08	1.96e-06	Promoter (<=1kb)	2	18873518	18875014	1497	2	LOC_Os10g35300.1	-685	LOC_Os10g35294.1;LOC_Os10g35294.2;LOC_Os10g35300.2;LOC_Os10g35300.1	LOC_Os10g35294;LOC_Os10g35294;LOC_Os10g35300;LOC_Os10g35300	0;0;-685;-685	Os10g0496000	dof zinc finger domain containing protein, putative, expressed
LOC_Os10g35300	35.874	15.77	-1.194	0.01761	Chr10	18872388	18872888	501	*	4.86	5.76	1.97	3.79	0.000249	0.00216	3' UTR	2	18873473	18875014	1542	2	LOC_Os10g35300.2	2126	LOC_Os10g35294.1;LOC_Os10g35294.2;LOC_Os10g35300.2;LOC_Os10g35300.1	LOC_Os10g35294;LOC_Os10g35294;LOC_Os10g35300;LOC_Os10g35300	0;0;2126;2126	Os10g0496000	dof zinc finger domain containing protein, putative, expressed
LOC_Os10g35370	31370.4	14591	-1.104	2.599e-93	Chr10	18903039	18903539	501	*	6.13	7.05	2.89	4.15	2.37e-07	6.25e-06	Exon (LOC_Os10g35370.1/LOC_Os10g35370, exon 4 of 4)	2	18900302	18904022	3721	1	LOC_Os10g35370.2	2737	LOC_Os10g35370.1;LOC_Os10g35370.2;LOC_Os10g35380.1	LOC_Os10g35370;LOC_Os10g35370;LOC_Os10g35380	0;0;-2985	Os10g0496900	oxidoreductase, short chain dehydrogenase/reductase family domain containing family, expressed	OsPORB|FGL	leaf|seedling|leaf development|growth|development|reproductive|reproductive growth	The rice faded green leaf locus encodes protochlorophyllide oxidoreductase B and is essential for chlorophyll synthesis under high light conditions|Two NADPH: Protochlorophyllide Oxidoreductase (POR) Isoforms Play Distinct Roles in Environmental Adaptation in Rice.
LOC_Os10g35370	31370.4	14591	-1.104	2.599e-93	Chr10	18901920	18902420	501	*	5.35	6.3	1.54	4.76	2.73e-07	6.9e-06	5' UTR	2	18900302	18904022	3721	1	LOC_Os10g35370.2	1618	LOC_Os10g35360.1;LOC_Os10g35370.1;LOC_Os10g35370.2	LOC_Os10g35360;LOC_Os10g35370;LOC_Os10g35370	-2913;0;0	Os10g0496900	oxidoreductase, short chain dehydrogenase/reductase family domain containing family, expressed	OsPORB|FGL	leaf|seedling|leaf development|growth|development|reproductive|reproductive growth	The rice faded green leaf locus encodes protochlorophyllide oxidoreductase B and is essential for chlorophyll synthesis under high light conditions|Two NADPH: Protochlorophyllide Oxidoreductase (POR) Isoforms Play Distinct Roles in Environmental Adaptation in Rice.
LOC_Os10g35840	28031.7	12577.6	-1.156	2.443e-87	Chr10	19162040	19162540	501	*	5.83	6.81	-0.14	6.96	2.66e-09	2.78e-07	Promoter (<=1kb)	2	19159093	19162504	3412	2	LOC_Os10g35840.1	0	LOC_Os10g35840.1	LOC_Os10g35840	0	Os10g0502400	shikimate/quinate 5-dehydrogenase, putative, expressed
LOC_Os10g35950	166.972	62.068	-1.427	4.662e-10	Chr10	19214484	19214984	501	*	5.39	6.37	0.49	5.87	1.46e-08	8.48e-07	Exon (LOC_Os10g35950.1/LOC_Os10g35950, exon 1 of 2)	2	19213622	19216326	2705	1	LOC_Os10g35950.1	862	LOC_Os10g35950.1	LOC_Os10g35950	0	Os10g0503300	transferase family protein, putative, expressed
LOC_Os10g35950	166.972	62.068	-1.427	4.662e-10	Chr10	19211535	19212035	501	*	5.31	6.23	2.14	4.09	1.27e-05	0.000165	Promoter (1-2kb)	2	19213622	19216326	2705	1	LOC_Os10g35950.1	-1587	LOC_Os10g35950.1	LOC_Os10g35950	0	Os10g0503300	transferase family protein, putative, expressed
LOC_Os10g35950	166.972	62.068	-1.427	4.662e-10	Chr10	19213612	19214112	501	*	5.82	6.76	2.14	4.62	1.03e-08	6.8e-07	Promoter (<=1kb)	2	19213622	19216326	2705	1	LOC_Os10g35950.1	0	LOC_Os10g35950.1	LOC_Os10g35950	0	Os10g0503300	transferase family protein, putative, expressed
LOC_Os10g36848	175.387	63.144	-1.479	1.863e-10	Chr10	19734227	19734727	501	*	6.08	6.66	5.07	1.6	0.00174	0.0106	Exon (LOC_Os10g36848.1/LOC_Os10g36848, exon 1 of 2)	2	19728254	19735041	6788	2	LOC_Os10g36848.1	314	LOC_Os10g36848.1	LOC_Os10g36848	0	Os10g0512400	cytochrome P450, putative, expressed	OsCAld5H1|CYP84A5	vegetative|cell wall|lignin	Regulation of CONIFERALDEHYDE 5-HYDROXYLASE expression to modulate cell wall lignin structure in rice.|Lignin characterization of rice CONIFERALDEHYDE 5-HYDROXYLASE loss-of-function mutants generated with the CRISPR/Cas9 system.
LOC_Os10g37850	215.287	98.113	-1.132	3.091e-09	Chr10	20267648	20268148	501	*	5.19	6.03	2.89	3.14	0.00356	0.0187	Downstream (2-3kb)	2	20265415	20267622	2208	1	LOC_Os10g37850.3	2233	LOC_Os10g37850.2;LOC_Os10g37850.1;LOC_Os10g37850.4;LOC_Os10g37850.3;LOC_Os10g37860.1	LOC_Os10g37850;LOC_Os10g37850;LOC_Os10g37850;LOC_Os10g37850;LOC_Os10g37860	4338;2427;2427;2233;4207	Os10g0522601	armadillo, putative, expressed
LOC_Os10g37850	215.287	98.113	-1.132	3.091e-09	Chr10	20261223	20261723	501	*	5.01	5.99	-0.14	6.13	8.94e-07	1.74e-05	Promoter (1-2kb)	2	20263310	20267634	4325	1	LOC_Os10g37850.2	-1587	LOC_Os10g37840.5;LOC_Os10g37840.7;LOC_Os10g37840.3;LOC_Os10g37840.2;LOC_Os10g37840.4;LOC_Os10g37850.2	LOC_Os10g37840;LOC_Os10g37840;LOC_Os10g37840;LOC_Os10g37840;LOC_Os10g37840;LOC_Os10g37850	0;0;4211;4205;4203;-1587	Os10g0522601	armadillo, putative, expressed
LOC_Os10g37870	150.439	60.801	-1.311	1.441e-08	Chr10	20278147	20278647	501	*	4.74	5.68	1.09	4.59	5.82e-06	8.38e-05	Promoter (<=1kb)	2	20278178	20278485	308	2	LOC_Os10g37870.1	0	LOC_Os10g37870.1;LOC_Os10g37880.1;LOC_Os10g37880.2;LOC_Os10g37880.4;LOC_Os10g37880.3	LOC_Os10g37870;LOC_Os10g37880;LOC_Os10g37880;LOC_Os10g37880;LOC_Os10g37880	0;-2784;-2784;-2784;-2803	Os10g0522800	expressed protein
LOC_Os10g38140	1298.76	601.218	-1.109	4.367e-36	Chr10	20432580	20433080	501	*	6.11	7.07	1.97	5.1	8.92e-12	6.35e-09	Exon (LOC_Os10g38140.1/LOC_Os10g38140, exon 1 of 2)	2	20431775	20433265	1491	2	LOC_Os10g38140.1	185	LOC_Os10g38120.1;LOC_Os10g38130.1;LOC_Os10g38140.1;LOC_Os10g38150.1	LOC_Os10g38120;LOC_Os10g38130;LOC_Os10g38140;LOC_Os10g38150	0;0;0;2570	Os10g0525400	glutathione S-transferase, putative, expressed
LOC_Os10g38489	142.86	80.296	-0.835	0.0002767	Chr10	20553612	20554112	501	*	6.17	6.93	4.49	2.43	0.000477	0.00373	Promoter (<=1kb)	2	20553664	20560790	7127	1	LOC_Os10g38489.1	0	LOC_Os10g38470.1;LOC_Os10g38489.1	LOC_Os10g38470;LOC_Os10g38489	0;0	Os10g0528200	glutathione S-transferase GSTU6, putative, expressed	Osgstu4
LOC_Os10g38489	142.86	80.296	-0.835	0.0002767	Chr10	20556913	20557413	501	*	5.83	6.82	-0.14	6.96	8.9e-10	1.34e-07	Intron (LOC_Os10g38489.1/LOC_Os10g38489, intron 1 of 1)	2	20553664	20560790	7127	1	LOC_Os10g38489.1	3249	LOC_Os10g38489.1	LOC_Os10g38489	0	Os10g0528200	glutathione S-transferase GSTU6, putative, expressed	Osgstu4
LOC_Os10g39430	1332.83	655.912	-1.022	3.72e-33	Chr10	21035847	21036347	501	*	5.58	6.52	1.97	4.56	1.04e-07	3.36e-06	Promoter (<=1kb)	2	21036241	21039131	2891	1	LOC_Os10g39430.1	0	LOC_Os10g39430.1	LOC_Os10g39430	0	Os10g0539700	expressed protein
LOC_Os10g40100	414.644	245.474	-0.754	9.945e-08	Chr10	21468952	21469452	501	*	4.63	5.6	-0.14	5.74	1.17e-05	0.000153	Exon (LOC_Os10g40100.2/LOC_Os10g40100, exon 7 of 8)	2	21467608	21472160	4553	2	LOC_Os10g40100.2	2708	LOC_Os10g40090.1;LOC_Os10g40100.1;LOC_Os10g40100.2	LOC_Os10g40090;LOC_Os10g40100;LOC_Os10g40100	0;0;0	Os10g0548700	protein kinase, putative, expressed	NRRB	sheath|leaf	Suppression of expression of the putative receptor-like kinase gene NRRB enhances resistance to bacterial leaf streak in rice
LOC_Os10g40130	262.815	157.096	-0.747	1.055e-05	Chr10	21485691	21486191	501	*	5.39	6.33	1.74	4.58	1.8e-07	5.06e-06	Exon (LOC_Os10g40130.1/LOC_Os10g40130, exon 1 of 5)	2	21482733	21486316	3584	2	LOC_Os10g40130.1	125	LOC_Os10g40130.1;LOC_Os10g40140.1	LOC_Os10g40130;LOC_Os10g40140	0;0	Os10g0548900	Mur ligase family protein, putative, expressed
LOC_Os10g40700	102.527	58.543	-0.798	0.005799	Chr10	21827070	21827570	501	*	6.35	6.82	5.65	1.16	0.0119	0.0462	Downstream (2-3kb)	2	21830151	21831694	1544	2	LOC_Os10g40700.1	4124	LOC_Os10g40700.1	LOC_Os10g40700	0	Os10g0555600	expansin precursor, putative, expressed
LOC_Os10g40700	102.527	58.543	-0.798	0.005799	Chr10	21831211	21831711	501	*	6.76	7.27	5.96	1.32	0.0105	0.042	Promoter (<=1kb)	2	21830151	21831694	1544	2	LOC_Os10g40700.1	0	LOC_Os10g40700.1	LOC_Os10g40700	0	Os10g0555600	expansin precursor, putative, expressed
LOC_Os10g40720	2695.92	800.859	-1.751	6.462e-140	Chr10	21848282	21848782	501	*	6.3	7.04	4.72	2.32	7.84e-06	0.000108	Exon (LOC_Os10g40720.1/LOC_Os10g40720, exon 4 of 4)	2	21847804	21849726	1923	2	LOC_Os10g40720.1	944	LOC_Os10g40720.1	LOC_Os10g40720	0	Os10g0555900	expansin precursor, putative, expressed	OsEXPB3	vegetative|cell wall|root	Biochemical properties and localization of the beta-expansin OsEXPB3 in rice (Oryza sativa L.)
LOC_Os10g40730	782.342	348.217	-1.168	3.802e-29	Chr10	21858577	21859077	501	*	5.37	6.35	-0.14	6.49	4.72e-08	1.91e-06	Promoter (<=1kb)	2	21858750	21861307	2558	1	LOC_Os10g40730.1	0	LOC_Os10g40730.1	LOC_Os10g40730	0	Os10g0556100	expansin precursor, putative, expressed
LOC_Os10g40730	782.342	348.217	-1.168	3.802e-29	Chr10	21862018	21862518	501	*	6.12	6.62	5.33	1.29	0.00464	0.0228	Downstream (<1kb)	2	21858750	21861307	2558	1	LOC_Os10g40730.1	3268	LOC_Os10g40730.1;LOC_Os10g40740.1	LOC_Os10g40730;LOC_Os10g40740	0;0	Os10g0556100	expansin precursor, putative, expressed
LOC_Os10g40730	782.342	348.217	-1.168	3.802e-29	Chr10	21855885	21856385	501	*	7.01	7.49	6.3	1.19	0.0127	0.0482	Promoter (2-3kb)	2	21858750	21861307	2558	1	LOC_Os10g40730.1	-2365	LOC_Os10g40730.1	LOC_Os10g40730	0	Os10g0556100	expansin precursor, putative, expressed
LOC_Os10g40810	30.269	6.937	-2.133	0.0003561	Chr10	21944391	21944891	501	*	6.46	7.03	5.49	1.54	0.0111	0.0439	Exon (LOC_Os10g40810.1/LOC_Os10g40810, exon 2 of 2)	2	21943291	21945186	1896	1	LOC_Os10g40810.1	1100	LOC_Os10g40810.1	LOC_Os10g40810	0	Os10g0557600	GATA zinc finger domain containing protein, expressed
LOC_Os10g40990	181.551	84.99	-1.096	1.027e-07	Chr10	22012951	22013451	501	*	4.93	5.9	0.39	5.5	5.6e-07	1.19e-05	3' UTR	2	22012567	22014325	1759	2	LOC_Os10g40990.1	874	LOC_Os10g40990.1;LOC_Os10g41000.1;LOC_Os10g41000.2	LOC_Os10g40990;LOC_Os10g41000;LOC_Os10g41000	0;0;0	Os10g0559200	flavonol synthase/flavanone 3-hydroxylase, putative, expressed
LOC_Os10g42620	90.376	42.16	-1.098	0.0001453	Chr10	22979363	22979863	501	*	5.75	6.38	4.59	1.79	0.00432	0.0216	Promoter (1-2kb)	2	22981601	22986324	4724	1	LOC_Os10g42620.1	-1738	LOC_Os10g42620.1	LOC_Os10g42620	0	Os10g0576900	dihydroflavonol-4-reductase, putative, expressed
LOC_Os10g42620	90.376	42.16	-1.098	0.0001453	Chr10	22985375	22985875	501	*	5.04	6.02	-0.14	6.16	6.93e-07	1.41e-05	Exon (LOC_Os10g42620.1/LOC_Os10g42620, exon 3 of 4)	2	22981601	22986324	4724	1	LOC_Os10g42620.1	3774	LOC_Os10g42620.1;LOC_Os10g42630.1;LOC_Os10g42630.2;LOC_Os10g42630.3	LOC_Os10g42620;LOC_Os10g42630;LOC_Os10g42630;LOC_Os10g42630	0;4025;4025;4023	Os10g0576900	dihydroflavonol-4-reductase, putative, expressed
LOC_Os11g02270	101.161	51.397	-0.973	0.0004283	Chr11	648312	648812	501	*	5.44	6.36	2.19	4.17	2.62e-06	4.27e-05	Exon (LOC_Os11g02270.1/LOC_Os11g02270, exon 2 of 2)	3	646980	649082	2103	1	LOC_Os11g02270.1	1332	LOC_Os11g02270.1;LOC_Os11g02280.1;LOC_Os11g02290.1	LOC_Os11g02270;LOC_Os11g02280;LOC_Os11g02290	0;0;-2373	Os11g0114150	expressed protein
LOC_Os11g02424	3434.88	1655.87	-1.054	2.374e-40	Chr11	722960	723460	501	*	6.88	7.54	5.64	1.9	5.03e-06	7.4e-05	Promoter (<=1kb)	3	722930	726974	4045	1	LOC_Os11g02424.1	30	LOC_Os11g02410.1;LOC_Os11g02424.1;LOC_Os11g02424.2	LOC_Os11g02410;LOC_Os11g02424;LOC_Os11g02424	0;0;0	Os11g0116200	LTPL9 - Protease inhibitor/seed storage/LTP family protein precursor, expressed
LOC_Os11g02540	103.316	50.825	-1.028	0.0003637	Chr11	795175	795675	501	*	6.33	6.9	5.37	1.53	0.000176	0.00161	Promoter (<=1kb)	3	793116	795608	2493	2	LOC_Os11g02540.1	0	LOC_Os11g02540.1	LOC_Os11g02540	0	Os11g0117550	WRKY50, expressed
LOC_Os11g02730	525.111	342.383	-0.616	1.098e-07	Chr11	886997	887497	501	*	5.76	6.75	-0.14	6.89	1.42e-09	1.86e-07	Promoter (<=1kb)	3	886242	887578	1337	2	LOC_Os11g02730.1	81	LOC_Os11g02720.1;LOC_Os11g02730.1;LOC_Os11g02740.1	LOC_Os11g02720;LOC_Os11g02730;LOC_Os11g02740	4887;0;4746	Os11g0120100	harpin-induced protein 1 domain containing protein, expressed
LOC_Os11g03440	19.67	6	-1.699	0.02385	Chr11	1317428	1317928	501	*	5.27	6.25	-0.14	6.39	8.98e-08	3.01e-06	3' UTR	3	1317226	1318705	1480	2	LOC_Os11g03440.1	777	LOC_Os11g03440.1	LOC_Os11g03440	0	Os11g0128500	myb-like DNA-binding domain containing protein, putative, expressed
LOC_Os11g03660	57.579	29.549	-0.965	0.01523	Chr11	1425959	1426459	501	*	5.54	6.2	4.25	1.96	0.00719	0.0318	Promoter (<=1kb)	3	1425882	1426610	729	1	LOC_Os11g03660.1	77	LOC_Os11g03660.1;LOC_Os11g03670.1	LOC_Os11g03660;LOC_Os11g03670	0;6268	Os11g0131100	VQ domain containing protein, putative, expressed
LOC_Os11g05530	101.475	53.925	-0.917	0.001974	Chr11	2490972	2491472	501	*	5.17	6	2.98	3.02	0.00605	0.0279	Exon (LOC_Os11g05530.1/LOC_Os11g05530, exon 1 of 1)	3	2490667	2491745	1079	2	LOC_Os11g05530.1	273	LOC_Os11g05510.1;LOC_Os11g05520.1;LOC_Os11g05530.1	LOC_Os11g05510;LOC_Os11g05520;LOC_Os11g05530	0;0;0	Os11g0153300	expressed protein
LOC_Os11g05660	129.224	27.176	-2.257	1.344e-15	Chr11	2569283	2569783	501	*	6.49	7.09	5.42	1.68	1.79e-05	0.000222	Exon (LOC_Os11g05660.1/LOC_Os11g05660, exon 1 of 1)	3	2568971	2570391	1421	2	LOC_Os11g05660.1	608	LOC_Os11g05650.1;LOC_Os11g05660.1	LOC_Os11g05650;LOC_Os11g05660	4131;0	Os11g0155100	OsFBX396 - F-box domain containing protein, expressed
LOC_Os11g05860	4785.96	2759.06	-0.794	1.636e-38	Chr11	2738720	2739220	501	*	6.42	7.05	5.28	1.78	0.00515	0.0248	Exon (LOC_Os11g05860.1/LOC_Os11g05860, exon 1 of 1)	3	2738389	2739467	1079	2	LOC_Os11g05860.1	247	LOC_Os11g05850.2;LOC_Os11g05860.1	LOC_Os11g05850;LOC_Os11g05860	8577;0	Os11g0157200	harpin-induced protein 1 domain containing protein, expressed
LOC_Os11g06590	87.01	52.723	-0.726	0.01822	Chr11	3183380	3183880	501	*	6.15	6.7	5.23	1.47	0.00335	0.0178	Exon (LOC_Os11g06590.1/LOC_Os11g06590, exon 1 of 2)	3	3183394	3184169	776	2	LOC_Os11g06590.1	289	LOC_Os11g06580.1;LOC_Os11g06590.1;LOC_Os11g06595.1	LOC_Os11g06580;LOC_Os11g06590;LOC_Os11g06595	4440;0;0	Os11g0166201	alcohol dehydrogenase GroES-like domain containing protein, expressed
LOC_Os11g10520	1059.62	488.497	-1.118	2.863e-31	Chr11	5756012	5756512	501	*	4.96	5.91	1.09	4.82	8.7e-07	1.7e-05	3' UTR	3	5755644	5760022	4379	2	LOC_Os11g10520.2	3510	LOC_Os11g10520.1;LOC_Os11g10520.3;LOC_Os11g10520.2	LOC_Os11g10520;LOC_Os11g10520;LOC_Os11g10520	0;0;0	Os11g0210600	dehydrogenase, putative, expressed
LOC_Os11g13870	25.205	7.357	-1.792	0.00414	Chr11	7651337	7652331	995	*	6.67	7.24	5.73	1.51	0.00166	0.0102	Promoter (<=1kb)	3	7651046	7652401	1356	2	LOC_Os11g13870.1	70	LOC_Os11g13860.1;LOC_Os11g13870.1	LOC_Os11g13860;LOC_Os11g13870	7217;0	Os11g0242600	plant-specific domain TIGR01627 family protein, expressed
LOC_Os11g13870	25.205	7.357	-1.792	0.00414	Chr11	7653421	7653921	501	*	5.24	6.05	3.24	2.81	0.000241	0.0021	Promoter (1-2kb)	3	7651046	7652401	1356	2	LOC_Os11g13870.1	-1020	LOC_Os11g13870.1;LOC_Os11g13880.1	LOC_Os11g13870;LOC_Os11g13880	0;-1646	Os11g0242600	plant-specific domain TIGR01627 family protein, expressed
LOC_Os11g13890	343535	220766	-0.638	3.868e-29	Chr11	7660742	7661242	501	*	4.77	5.74	-0.14	5.88	2.74e-06	4.42e-05	5' UTR	3	7659682	7662281	2600	1	LOC_Os11g13890.6	1060	LOC_Os11g13880.1;LOC_Os11g13890.1;LOC_Os11g13890.2;LOC_Os11g13890.4;LOC_Os11g13890.6;LOC_Os11g13890.5	LOC_Os11g13880;LOC_Os11g13890;LOC_Os11g13890;LOC_Os11g13890;LOC_Os11g13890;LOC_Os11g13890	5175;0;0;0;0;0	Os11g0242800	chlorophyll A-B binding protein, putative, expressed	ASCAB9-A|CP26|Lhcb5	resistance|blast|magnaporthe oryzae	Phosphorylation-guarded light-harvesting complex II contributes to broad-spectrum blast resistance in rice.
LOC_Os11g13940	77.224	48.23	-0.674	0.03339	Chr11	7716737	7717237	501	*	5.48	6.09	4.4	1.69	0.00493	0.024	Promoter (<=1kb)	3	7712006	7717010	5005	2	LOC_Os11g13940.1	0	LOC_Os11g13940.1	LOC_Os11g13940	0	Os11g0243750	NBS-LRR disease resistance protein, putative, expressed
LOC_Os11g14400	17.315	6.015	-1.528	0.04354	Chr11	8087347	8087847	501	*	5.3	6.28	-0.14	6.42	7.29e-08	2.63e-06	Promoter (<=1kb)	3	8084983	8086522	1540	2	LOC_Os11g14400.1	-825	LOC_Os11g14390.1;LOC_Os11g14400.1;LOC_Os11g14410.1	LOC_Os11g14390;LOC_Os11g14400;LOC_Os11g14410	-2522;-825;0	Os11g0249400	polygalacturonase, putative, expressed
LOC_Os11g14544	144.496	75.237	-0.943	3.059e-05	Chr11	8169527	8170027	501	*	5.34	6.28	1.77	4.51	8.39e-07	1.65e-05	5' UTR	3	8163352	8170143	6792	2	LOC_Os11g14544.4	116	LOC_Os11g14544.1;LOC_Os11g14544.2;LOC_Os11g14544.3;LOC_Os11g14544.5;LOC_Os11g14544.4;LOC_Os11g14544.6;LOC_Os11g14544.7	LOC_Os11g14544;LOC_Os11g14544;LOC_Os11g14544;LOC_Os11g14544;LOC_Os11g14544;LOC_Os11g14544;LOC_Os11g14544	0;0;0;0;0;-764;0	Os11g0251400	expressed protein
LOC_Os11g17970	398.772	162.144	-1.299	7.844e-21	Chr11	10091790	10092290	501	*	6.56	7.22	5.32	1.9	5.35e-07	1.15e-05	Distal Intergenic	3	10096106	10102801	6696	1	LOC_Os11g17970.1	-3816				Os11g0282800	POT family protein, expressed
LOC_Os11g18044	503.887	285.882	-0.816	1.476e-11	Chr11	10143117	10143617	501	*	7.01	7.52	6.22	1.29	0.00994	0.0404	Exon (LOC_Os11g18044.1/LOC_Os11g18044, exon 5 of 5)	3	10133345	10144004	10660	1	LOC_Os11g18044.1	9772	LOC_Os11g18044.1	LOC_Os11g18044	0	Os11g0283500	peptide transporter PTR2, putative, expressed
LOC_Os11g18366	80.799	21.339	-1.978	3.564e-06	Chr11	10376116	10376616	501	*	5.64	6.16	4.82	1.34	0.0114	0.0447	Promoter (<=1kb)	3	10352224	10376608	24385	2	LOC_Os11g18366.3	0	LOC_Os11g18366.2;LOC_Os11g18366.3;LOC_Os11g18366.4;LOC_Os11g18382.1	LOC_Os11g18366;LOC_Os11g18366;LOC_Os11g18366;LOC_Os11g18382	0;0;0;3460	Os11g0286800	cycloartenol synthase, putative, expressed
LOC_Os11g19210	54.214	22.953	-1.233	0.001688	Chr11	10970589	10971089	501	*	5.65	6.35	4.28	2.07	0.0004	0.00322	Promoter (1-2kb)	3	10972674	10978707	6034	1	LOC_Os11g19210.1	-1585	LOC_Os11g19200.1;LOC_Os11g19210.1	LOC_Os11g19200;LOC_Os11g19210	3404;0	Os11g0297800	beta-D-xylosidase, putative, expressed
LOC_Os11g19210	54.214	22.953	-1.233	0.001688	Chr11	10975773	10976273	501	*	6.77	7.29	5.96	1.34	0.000671	0.00495	Exon (LOC_Os11g19210.1/LOC_Os11g19210, exon 2 of 5)	3	10972674	10978707	6034	1	LOC_Os11g19210.1	3099	LOC_Os11g19210.1;LOC_Os11g19220.1	LOC_Os11g19210;LOC_Os11g19220	0;0	Os11g0297800	beta-D-xylosidase, putative, expressed
LOC_Os11g20370	90.585	55.61	-0.705	0.01747	Chr11	11784158	11784658	501	*	6.3	6.89	5.3	1.59	0.00118	0.00781	Exon (LOC_Os11g20370.1/LOC_Os11g20370, exon 2 of 2)	3	11783946	11784660	715	1	LOC_Os11g20370.1	212	LOC_Os11g20370.1;LOC_Os11g20384.1	LOC_Os11g20370;LOC_Os11g20384	0;0	None	expressed protein
LOC_Os11g25720	104.648	52.061	-1.004	0.0004145	Chr11	14673398	14673898	501	*	5.23	6.22	-0.14	6.36	1.22e-07	3.77e-06	Intron (LOC_Os11g25720.1/LOC_Os11g25720, intron 1 of 1)	3	14663220	14675381	12162	2	LOC_Os11g25720.1	1483	LOC_Os11g25720.1	LOC_Os11g25720	0	Os11g0444000	cytokinin-N-glucosyltransferase 1, putative, expressed
LOC_Os11g26190	15.74	3.932	-2.005	0.01413	Chr11	14994656	14995156	501	*	6.13	6.7	5.19	1.51	0.00376	0.0195	Promoter (2-3kb)	3	14997419	14998182	764	1	LOC_Os11g26190.1	-2263	LOC_Os11g26190.1	LOC_Os11g26190	0	Os11g0448700	RALFL23 - Rapid ALkalinization Factor RALF family protein precursor, expressed
LOC_Os11g27540	301.254	102.652	-1.548	6.182e-20	Chr11	15851672	15852172	501	*	6.72	7.5	4.9	2.6	8.65e-11	2.88e-08	Promoter (<=1kb)	3	15850699	15852070	1372	2	LOC_Os11g27540.2	0	LOC_Os11g27540.2;LOC_Os11g27540.1	LOC_Os11g27540;LOC_Os11g27540	0;0	Os11g0463700	CRP7 - Cysteine-rich family protein precursor, expressed
LOC_Os11g28310	23.169	7.926	-1.562	0.02869	Chr11	16282131	16282631	501	*	5.69	6.47	3.86	2.61	2.45e-05	0.000293	3' UTR	3	16281677	16282725	1049	1	LOC_Os11g28310.1	454	LOC_Os11g28300.1;LOC_Os11g28300.2;LOC_Os11g28300.3;LOC_Os11g28310.1	LOC_Os11g28300;LOC_Os11g28300;LOC_Os11g28300;LOC_Os11g28310	6817;6817;6817;0	Os11g0472600	P21-Rho-binding domain containing protein, putative, expressed
LOC_Os11g29030	5.516	0	-5.028	0.008074	Chr11	16806937	16807437	501	*	6.43	6.96	5.58	1.37	0.000299	0.00252	Promoter (<=1kb)	3	16807964	16809227	1264	1	LOC_Os11g29030.1	-527	LOC_Os11g29030.1	LOC_Os11g29030	-527	Os11g0480000	disease resistance protein RPM1, putative, expressed
LOC_Os11g29050	8.279	0	-5.607	0.00094	Chr11	16824567	16825067	501	*	6.55	7.24	5.17	2.07	4.53e-07	1.01e-05	Exon (LOC_Os11g29050.1/LOC_Os11g29050, exon 4 of 5)	3	16821579	16826538	4960	1	LOC_Os11g29050.1	2988	LOC_Os11g29050.1	LOC_Os11g29050	0	Os11g0480300	NBS-LRR type disease resistance protein, putative, expressed
LOC_Os11g29290	63.125	13.107	-2.267	2.625e-08	Chr11	16986145	16986645	501	*	6.09	6.64	5.18	1.47	0.00197	0.0117	Exon (LOC_Os11g29290.1/LOC_Os11g29290, exon 1 of 1)	3	16985590	16987260	1671	1	LOC_Os11g29290.1	555	LOC_Os11g29290.1	LOC_Os11g29290	0	Os11g0483000	cytochrome P450, putative, expressed	HAN1	domestication|tolerance|chilling	Natural variation in the HAN1 gene confers chilling tolerance in rice and allowed adaptation to a temperate climate.
LOC_Os11g31780	62.986	33.32	-0.916	0.01157	Chr11	18653880	18654380	501	*	5.12	6.1	-0.14	6.24	4.26e-07	9.59e-06	Promoter (<=1kb)	3	18652661	18654223	1563	2	LOC_Os11g31780.1	0	LOC_Os11g31770.1;LOC_Os11g31770.3;LOC_Os11g31780.1;LOC_Os11g31790.1	LOC_Os11g31770;LOC_Os11g31770;LOC_Os11g31780;LOC_Os11g31790	17444;17444;0;-1581	None	expressed protein
LOC_Os11g32650	11749.4	3400.12	-1.789	1.708e-212	Chr11	19283774	19284274	501	*	5.48	6.38	2.53	3.85	2.57e-05	0.000305	Promoter (2-3kb)	3	19277557	19281016	3460	2	LOC_Os11g32650.1	-2758	LOC_Os11g32650.1	LOC_Os11g32650	0	Os11g0530600	chalcone synthase, putative, expressed	CHS
LOC_Os11g32950	23.544	8.749	-1.422	0.03555	Chr11	19476060	19476560	501	*	4.65	5.62	-0.14	5.76	5.78e-06	8.33e-05	Exon (LOC_Os11g32950.1/LOC_Os11g32950, exon 1 of 1)	3	19475737	19476618	882	1	LOC_Os11g32950.1	323	LOC_Os11g32950.1	LOC_Os11g32950	0	Os11g0534100	expressed protein
LOC_Os11g33270	351.33	127.842	-1.46	3.874e-22	Chr11	19677302	19677802	501	*	6.61	7.08	5.92	1.15	0.00342	0.0181	3' UTR	3	19675011	19678096	3086	1	LOC_Os11g33270.1	2291	LOC_Os11g33270.1	LOC_Os11g33270	0	Os11g0539200	glycosyl hydrolases family 16, putative, expressed	OsXTR1|XTH2	gibberellin| BR |cell elongation|height|brassinosteroid	Characterization of XET-related genes of rice|A brassinolide-suppressed rice MADS-box transcription factor, OsMDP1, has a negative regulatory role in BR signaling
LOC_Os11g34210	4912.56	2744.08	-0.841	6.985e-46	Chr11	20036467	20036967	501	*	5.5	6.46	1.34	5.12	2.19e-08	1.11e-06	Promoter (1-2kb)	3	20029917	20034675	4759	2	LOC_Os11g34210.2	-1792	LOC_Os11g34210.1;LOC_Os11g34210.2;LOC_Os11g34220.1	LOC_Os11g34210;LOC_Os11g34210;LOC_Os11g34220	-1792;-1792;0	Os11g0544800	aspartyl/glutamyl-tRNA amidotransferase subunit B, putative, expressed	OsGatB	root|cell division	OsGatB, the Subunit of tRNA-Dependent Amidotransferase, Is Required for Primary Root Development in Rice.
LOC_Os11g34940	4593.32	2383.34	-0.947	0.0003882	Chr11	20478351	20478851	501	*	5.2	6.05	2.79	3.27	0.00281	0.0155	Promoter (<=1kb)	3	20478176	20478870	695	2	LOC_Os11g34940.1	19	LOC_Os11g34940.1	LOC_Os11g34940	0	Os11g0550800	plastid-specific 50S ribosomal protein 6, chloroplast precursor, putative, expressed
LOC_Os11g35274	211.24	136.667	-0.626	0.0006407	Chr11	20678360	20678860	501	*	5.59	6.58	-0.14	6.72	9.45e-09	6.41e-07	Promoter (1-2kb)	3	20672349	20676720	4372	2	LOC_Os11g35274.1	-1640	LOC_Os11g35274.1	LOC_Os11g35274	0	Os11g0556400	protein kinase domain containing protein, expressed
LOC_Os11g35710	37.819	10.266	-1.867	0.0004232	Chr11	20946431	20946931	501	*	5.12	6.1	-0.14	6.24	2.7e-07	6.84e-06	Intron (LOC_Os11g35710.1/LOC_Os11g35710, intron 6 of 17)	3	20942415	20959702	17288	1	LOC_Os11g35710.1	4016	LOC_Os11g35710.1	LOC_Os11g35710	0	Os11g0562100	cycloartenol synthase, putative, expressed	OsOSC11|OsIAS1
LOC_Os11g37200	563.776	196.965	-1.514	2.324e-31	Chr11	21985574	21986074	501	*	5.62	6.39	3.81	2.58	9.76e-05	0.000964	Exon (LOC_Os11g37200.1/LOC_Os11g37200, exon 3 of 4)	3	21982349	21986444	4096	1	LOC_Os11g37200.1	3225	LOC_Os11g37200.1;LOC_Os11g37210.1	LOC_Os11g37200;LOC_Os11g37210	0;0	Os11g0581900	transmembrane BAX inhibitor motif-containing protein, putative, expressed
LOC_Os11g37920	22.563	7.527	-1.578	0.02802	Chr11	22491846	22492346	501	*	6.05	6.62	5.08	1.54	0.000398	0.00321	Exon (LOC_Os11g37920.1/LOC_Os11g37920, exon 1 of 2)	3	22491418	22493083	1666	1	LOC_Os11g37920.1	428	LOC_Os11g37910.1;LOC_Os11g37920.1;LOC_Os11g37930.1	LOC_Os11g37910;LOC_Os11g37920;LOC_Os11g37930	0;0;3202	Os11g0591550	DJ-1 family protein, putative, expressed
LOC_Os11g38650	1240.41	787.342	-0.655	9.662e-16	Chr11	22930495	22930995	501	*	5.31	6.12	3.32	2.8	2.12e-05	0.000258	Promoter (2-3kb)	3	22925987	22928036	2050	2	LOC_Os11g38650.1	-2459	LOC_Os11g38650.1	LOC_Os11g38650	0	Os11g0599200	UDP-glucoronosyl/UDP-glucosyl transferase, putative, expressed
LOC_Os11g42480	354.63	223.396	-0.665	2.676e-05	Chr11	25584834	25585334	501	*	7.07	7.56	6.33	1.23	0.0101	0.0409	Promoter (<=1kb)	3	25583964	25585370	1407	2	LOC_Os11g42480.1	36	LOC_Os11g42470.1;LOC_Os11g42480.1	LOC_Os11g42470;LOC_Os11g42480	2524;0	Os11g0644500	transferase family domain containing protein, expressed
LOC_Os11g42930	79.156	25.15	-1.649	3.704e-07	Chr11	25881861	25882361	501	*	6.52	7.1	5.5	1.6	3.54e-05	0.000403	Promoter (<=1kb)	3	25877767	25882203	4437	2	LOC_Os11g42930.1	0	LOC_Os11g42930.1	LOC_Os11g42930	0	Os11g0649300	expressed protein
LOC_Os11g42960	81.874	34.05	-1.268	2.789e-05	Chr11	25894188	25894688	501	*	4.86	5.84	-0.14	5.98	1.77e-06	3.08e-05	Exon (LOC_Os11g42960.1/LOC_Os11g42960, exon 2 of 2)	3	25893719	25895032	1314	2	LOC_Os11g42960.1	344	LOC_Os11g42950.1;LOC_Os11g42960.1;LOC_Os11g42970.1	LOC_Os11g42950;LOC_Os11g42960;LOC_Os11g42970	-2998;0;2531	Os11g0649600	integral membrane protein TIGR01569 containing protein, expressed
LOC_Os11g44340	30.135	3.386	-3.185	8.108e-06	Chr11	26794155	26794655	501	*	5.72	6.41	4.34	2.07	0.000114	0.00111	Promoter (<=1kb)	3	26794437	26802410	7974	1	LOC_Os11g44340.1	0	LOC_Os11g44330.1;LOC_Os11g44340.1	LOC_Os11g44330;LOC_Os11g44340	-634;0	Os11g0664800	calmodulin binding protein, putative, expressed
LOC_Os11g44790	95.987	63.765	-0.594	0.03551	Chr11	27107930	27108908	979	*	6.56	7.38	4.47	2.92	4.71e-13	8.9e-10	Exon (LOC_Os11g44790.1/LOC_Os11g44790, exon 6 of 6)	3	27105646	27108549	2904	1	LOC_Os11g44790.1	2284	LOC_Os11g44790.1	LOC_Os11g44790	0	Os11g0670700	EAP30/Vps36 family domain containing protein, expressed
LOC_Os11g48050	67.189	27.447	-1.297	0.0003565	Chr11	28966473	28966973	501	*	5.55	6.54	-0.14	6.68	2.51e-08	1.22e-06	5' UTR	3	28965317	28967139	1823	2	LOC_Os11g48050.1	166	LOC_Os11g48040.1;LOC_Os11g48050.1	LOC_Os11g48040;LOC_Os11g48050	5317;0	Os11g0707900	expressed protein
LOC_Os12g01370	101.22	47.713	-1.094	0.0002387	Chr12	229495	229995	501	*	5.67	6.66	-0.14	6.8	4.62e-09	3.93e-07	5' UTR	4	226239	230189	3951	2	LOC_Os12g01370.1	194	LOC_Os12g01370.1	LOC_Os12g01370	0	Os12g0104400	fatty acid desaturase, putative, expressed	OsFAD3	growth|seed|chilling|leaf|temperature|root	Structure, chromosomal location and expression of a rice gene encoding the microsome omega-3 fatty acid desaturase|Identification and evaluation of omega-3 fatty acid desaturase genes for hyperfortifying alpha-linolenic acid in transgenic rice seed
LOC_Os12g02330	4626.63	2815.18	-0.717	6.12e-34	Chr12	751873	752373	501	*	6.92	7.46	6.04	1.42	0.00305	0.0165	Distal Intergenic	4	746155	747300	1146	1	LOC_Os12g02330.2	5718				Os12g0115300	LTPL13 - Protease inhibitor/seed storage/LTP family protein precursor, expressed
LOC_Os12g02350	128.459	83.229	-0.632	0.01157	Chr12	764147	764647	501	*	6.69	7.16	5.97	1.19	0.000419	0.00335	5' UTR	4	763791	764723	933	1	LOC_Os12g02350.1	356	LOC_Os12g02340.1;LOC_Os12g02340.2;LOC_Os12g02350.1;LOC_Os12g02370.4;LOC_Os12g02370.2	LOC_Os12g02340;LOC_Os12g02340;LOC_Os12g02350;LOC_Os12g02370;LOC_Os12g02370	0;0;0;0;0	Os12g0115600	RING-H2 finger protein, putative, expressed
LOC_Os12g02640	572.265	248.956	-1.202	3.094e-19	Chr12	911538	912038	501	*	5.4	6.21	3.38	2.83	0.0113	0.0445	Promoter (<=1kb)	4	912504	916531	4028	1	LOC_Os12g02640.1	-466	LOC_Os12g02620.1;LOC_Os12g02660.2;LOC_Os12g02630.1;LOC_Os12g02640.1	LOC_Os12g02620;LOC_Os12g02660;LOC_Os12g02630;LOC_Os12g02640	5216;0;0;-466	Os12g0119000	cytochrome P450 72A1, putative, expressed
LOC_Os12g04110	66.115	27.642	-1.259	0.0002223	Chr12	1721774	1722274	501	*	5.43	6.42	-0.14	6.56	3.22e-08	1.46e-06	Exon (LOC_Os12g04110.1/LOC_Os12g04110, exon 8 of 8)	4	1719707	1726259	6553	2	LOC_Os12g04110.1	3985	LOC_Os12g04110.1	LOC_Os12g04110	0	Os12g0135000	pentatricopeptide, putative, expressed
LOC_Os12g04110	66.115	27.642	-1.259	0.0002223	Chr12	1723771	1724271	501	*	5.54	6.22	4.23	1.99	0.00218	0.0127	Exon (LOC_Os12g04110.1/LOC_Os12g04110, exon 2 of 8)	4	1719707	1726259	6553	2	LOC_Os12g04110.1	1988	LOC_Os12g04110.1	LOC_Os12g04110	0	Os12g0135000	pentatricopeptide, putative, expressed
LOC_Os12g04220	368.698	240.178	-0.617	4.822e-05	Chr12	1783432	1783932	501	*	5.04	5.95	2.06	3.89	6.33e-05	0.000664	Promoter (<=1kb)	4	1783575	1789565	5991	1	LOC_Os12g04220.1	0	LOC_Os12g04220.1	LOC_Os12g04220	0	Os12g0136900	calcium-transporting ATPase, plasma membrane-type, putative, expressed
LOC_Os12g04860	94.157	60.333	-0.631	0.03797	Chr12	2090248	2090748	501	*	5.46	6.3	3.19	3.11	0.000125	0.0012	Promoter (<=1kb)	4	2087516	2090631	3116	2	LOC_Os12g04860.1	0	LOC_Os12g04860.1;LOC_Os12g04860.2;LOC_Os12g04870.1;LOC_Os12g04880.2	LOC_Os12g04860;LOC_Os12g04860;LOC_Os12g04870;LOC_Os12g04880	0;0;1346;-2686	Os12g0142600	DTW domain containing protein, putative, expressed
LOC_Os12g05180	53.335	22.831	-1.232	0.004415	Chr12	2289776	2290276	501	*	6.01	6.54	5.16	1.38	0.00157	0.00984	Exon (LOC_Os12g05180.1/LOC_Os12g05180, exon 1 of 1)	4	2288574	2290544	1971	2	LOC_Os12g05180.1	268	LOC_Os12g05170.1;LOC_Os12g05180.1	LOC_Os12g05170;LOC_Os12g05180	0;0	Os12g0146500	avr9/Cf-9 rapidly elicited protein, putative, expressed
LOC_Os12g05260	254.044	164.617	-0.63	0.0002099	Chr12	2337850	2338613	764	*	6.1	6.65	5.2	1.45	0.00628	0.0287	Promoter (<=1kb)	4	2338072	2339171	1100	1	LOC_Os12g05260.1	0	LOC_Os12g05260.1	LOC_Os12g05260	0	Os12g0147800	phytosulfokines precursor, putative, expressed	OsPSK5
LOC_Os12g05609	204.106	107.508	-0.918	2.035e-06	Chr12	2575367	2575867	501	*	5.23	5.9	3.96	1.94	0.00649	0.0294	Promoter (<=1kb)	4	2574325	2575584	1260	2	LOC_Os12g05609.1	0	LOC_Os12g05600.1;LOC_Os12g05609.1	LOC_Os12g05600;LOC_Os12g05609	3744;0	Os12g0152200	OsFBO24 - F-box and other domain containing protein, expressed
LOC_Os12g05890	214.396	88.358	-1.285	2.564e-09	Chr12	2705939	2706439	501	*	6.17	7.08	3.07	4.01	2.77e-06	4.45e-05	Exon (LOC_Os12g05890.1/LOC_Os12g05890, exon 1 of 1)	4	2705805	2706749	945	2	LOC_Os12g05890.1	310	LOC_Os12g05890.1;LOC_Os12g05900.2;LOC_Os12g05900.1	LOC_Os12g05890;LOC_Os12g05900;LOC_Os12g05900	0;7648;7648	Os12g0155100	expressed protein
LOC_Os12g05980	108.161	71.931	-0.586	0.02694	Chr12	2751847	2752347	501	*	5.62	6.34	4.09	2.26	0.00151	0.0095	Promoter (<=1kb)	4	2751805	2752653	849	1	LOC_Os12g05980.1	42	LOC_Os12g05970.1;LOC_Os12g05980.1	LOC_Os12g05970;LOC_Os12g05980	0;0	Os12g0156000	DUF584 domain containing protein, putative, expressed
LOC_Os12g08760	7122.62	3915.94	-0.863	2.844e-54	Chr12	4499716	4500216	501	*	6.67	7.23	5.76	1.47	0.00992	0.0403	Promoter (<=1kb)	4	4499736	4503990	4255	1	LOC_Os12g08760.1	0	LOC_Os12g08760.1	LOC_Os12g08760	0	Os12g0189300	carboxyvinyl-carboxyphosphonate phosphorylmutase, putative, expressed
LOC_Os12g08770	62201.5	37250	-0.74	5.421e-07	Chr12	4507941	4508441	501	*	6.79	7.51	5.31	2.2	5.83e-05	0.000618	Distal Intergenic	4	4506723	4507879	1157	1	LOC_Os12g08770.1	1218	LOC_Os12g08770.1	LOC_Os12g08770	0	Os12g0189400	photosystem I reaction center subunit N, chloroplast precursor, putative, expressed
LOC_Os12g08920	1114.29	557.59	-0.997	8.155e-22	Chr12	4649519	4650019	501	*	5.73	6.65	2.56	4.08	4.36e-06	6.55e-05	Distal Intergenic	4	4653054	4654613	1560	2	LOC_Os12g08920.1	4594	LOC_Os12g08900.1	LOC_Os12g08900	0	Os12g0191500	peroxidase precursor, putative, expressed
LOC_Os12g08920	1114.29	557.59	-0.997	8.155e-22	Chr12	4654033	4654533	501	*	5.99	6.82	3.83	2.99	0.000646	0.00479	Promoter (<=1kb)	4	4653054	4654613	1560	2	LOC_Os12g08920.1	80	LOC_Os12g08920.1;LOC_Os12g08930.1	LOC_Os12g08920;LOC_Os12g08930	0;0	Os12g0191500	peroxidase precursor, putative, expressed
LOC_Os12g09770	811.191	519.537	-0.64	4.786e-10	Chr12	5168189	5168689	501	*	4.9	5.86	0.78	5.07	2.82e-06	4.52e-05	Distal Intergenic	4	5172120	5175084	2965	1	LOC_Os12g09770.1	-3431				Os12g0199500	O-methyltransferase, putative, expressed
LOC_Os12g10320	1729.07	936.917	-0.884	4.034e-29	Chr12	5456036	5456536	501	*	6.43	7.04	5.34	1.7	0.00462	0.0227	Exon (LOC_Os12g10320.1/LOC_Os12g10320, exon 1 of 1)	4	5455273	5457079	1807	2	LOC_Os12g10320.1	543	LOC_Os12g10320.1	LOC_Os12g10320	0	Os12g0204500	plant-specific domain TIGR01627 family protein, expressed
LOC_Os12g12580	764.787	411.032	-0.895	5.58e-17	Chr12	6915957	6916457	501	*	5.99	6.82	3.85	2.97	0.00445	0.0222	Promoter (<=1kb)	4	6916185	6918603	2419	1	LOC_Os12g12580.1	0	LOC_Os12g12560.1;LOC_Os12g12570.1;LOC_Os12g12580.1;LOC_Os12g12580.2	LOC_Os12g12560;LOC_Os12g12570;LOC_Os12g12580;LOC_Os12g12580	4738;0;0;-263	Os12g0226900	NADP-dependent oxidoreductase, putative, expressed
LOC_Os12g13030	63.952	25.287	-1.331	0.0004145	Chr12	7226694	7227194	501	*	7.03	7.55	6.19	1.35	0.0011	0.00741	Distal Intergenic	4	7235000	7236919	1920	1	LOC_Os12g13030.1	-7806				Os12g0232300	osFTL7 FT-Like7 homologous to Flowering Locus T gene; contains Pfam profile PF01161: Phosphatidylethanolamine-binding protein, expressed
LOC_Os12g21784	506.27	166.751	-1.6	5.721e-27	Chr12	12261669	12262169	501	*	4.67	5.64	-0.14	5.78	6.64e-06	9.39e-05	Promoter (<=1kb)	4	12258432	12262067	3636	2	LOC_Os12g21784.1	0	LOC_Os12g21784.1;LOC_Os12g21789.2;LOC_Os12g21789.1;LOC_Os12g21789.3	LOC_Os12g21784;LOC_Os12g21789;LOC_Os12g21789;LOC_Os12g21789	0;6120;5351;5351	Os12g0406000	expressed protein
LOC_Os12g22284	1462.48	749.843	-0.964	2.019e-34	Chr12	12581680	12582180	501	*	5.72	6.37	4.5	1.87	0.000754	0.00545	Intron (LOC_Os12g22284.1/LOC_Os12g22284, intron 1 of 7)	4	12568757	12587004	18248	2	LOC_Os12g22284.1	4824	LOC_Os12g22284.1	LOC_Os12g22284	0	Os12g0411700	white-brown complex homolog protein 11, putative, expressed
LOC_Os12g22284	1462.48	749.843	-0.964	2.019e-34	Chr12	12573662	12574162	501	*	5.95	6.48	5.1	1.38	0.00465	0.0229	Exon (LOC_Os12g22284.1/LOC_Os12g22284, exon 3 of 8)	4	12568757	12587004	18248	2	LOC_Os12g22284.1	12842	LOC_Os12g22284.1	LOC_Os12g22284	0	Os12g0411700	white-brown complex homolog protein 11, putative, expressed
LOC_Os12g24800	1069.75	10.356	-6.694	3.414e-139	Chr12	14228507	14229007	501	*	6.77	7.21	6.12	1.09	0.0015	0.00947	Distal Intergenic	4	14232903	14234903	2001	2	LOC_Os12g24800.1	5896				Os12g0435200	9-cis-epoxycarotenoid dioxygenase 1, chloroplast precursor, putative, expressed	OsNCED2	anther| ABA	ABA regulates apoplastic sugar transport and is a potential signal for cold-induced pollen sterility in rice|A rice F-box gene, OsFbx352, is involved in glucose-delayed seed germination in rice
LOC_Os12g26880	116.817	50.429	-1.205	3.897e-05	Chr12	15759789	15760289	501	*	5.52	6.08	4.6	1.48	0.0109	0.0432	Exon (LOC_Os12g26880.1/LOC_Os12g26880, exon 2 of 2)	4	15758649	15760484	1836	1	LOC_Os12g26880.1	1140	LOC_Os12g26880.1	LOC_Os12g26880	0	Os12g0454600	plastocyanin-like domain containing protein, putative, expressed
LOC_Os12g29520	1235.29	1021.25	-0.588	0.003122	Chr12	17569428	17569928	501	*	6.56	7.01	5.89	1.13	0.00131	0.0085	Downstream (1-2kb)	4	17571537	17577896	6360	2	LOC_Os12g29520.1	7968	LOC_Os12g29520.1;LOC_Os12g29520.2;LOC_Os12g29520.3;LOC_Os12g29520.4;LOC_Os12g29520.5	LOC_Os12g29520;LOC_Os12g29520;LOC_Os12g29520;LOC_Os12g29520;LOC_Os12g29520	0;0;0;0;0	Os12g0479400	auxin response factor, putative, expressed	OsARF24	auxin|auxin response	Rice actin-binding protein RMD is a key link in the auxin Cactin regulatory loop that controls cell growth
LOC_Os12g35590	73.323	11.755	-2.646	2.877e-11	Chr12	21640906	21641406	501	*	5.29	6.27	0.49	5.77	2.85e-08	1.34e-06	5' UTR	4	21640401	21641720	1320	2	LOC_Os12g35590.1	314	LOC_Os12g35580.2;LOC_Os12g35580.1;LOC_Os12g35590.1;LOC_Os12g35600.1	LOC_Os12g35580;LOC_Os12g35580;LOC_Os12g35590;LOC_Os12g35600	0;0;0;-2897	Os12g0541200	expressed protein
LOC_Os12g35640	370.884	207.213	-0.84	1.428e-09	Chr12	21669048	21669548	501	*	5.39	6.2	3.38	2.82	0.0133	0.0499	Promoter (<=1kb)	4	21666234	21669379	3146	2	LOC_Os12g35640.1	0	LOC_Os12g35630.1;LOC_Os12g35640.1	LOC_Os12g35630;LOC_Os12g35640	8397;0	Os12g0541600	OsAPRL6 adenosine 5'-phosphosulfate reductase-like OsAPRL6, expressed
LOC_Os12g36270	177.164	10.173	-4.107	7.409e-36	Chr12	22213814	22214314	501	*	5.44	6.32	2.72	3.6	0.000161	0.00149	Promoter (<=1kb)	4	22213880	22218978	5099	1	LOC_Os12g36270.1	0	LOC_Os12g36260.1;LOC_Os12g36270.1	LOC_Os12g36260;LOC_Os12g36270	-1629;0	Os12g0548800	expressed protein
LOC_Os12g36420	80.891	0	-8.911	3.74e-12	Chr12	22289123	22289623	501	*	6.8	7.39	5.78	1.61	8.87e-05	0.000889	Exon (LOC_Os12g36420.1/LOC_Os12g36420, exon 2 of 4)	4	22287806	22290761	2956	1	LOC_Os12g36420.1	1317	LOC_Os12g36410.1;LOC_Os12g36420.1;LOC_Os12g36430.1;LOC_Os12g36430.2	LOC_Os12g36410;LOC_Os12g36420;LOC_Os12g36430;LOC_Os12g36430	3667;0;0;0	Os12g0550700	expressed protein
LOC_Os12g36430	93.309	6.174	-3.935	5.589e-19	Chr12	22297690	22298190	501	*	7.07	7.51	6.43	1.08	0.00479	0.0234	Promoter (2-3kb)	4	22291142	22294802	3661	2	LOC_Os12g36430.2	-2888	LOC_Os12g36430.1;LOC_Os12g36430.2;LOC_Os12g36440.1	LOC_Os12g36430;LOC_Os12g36430;LOC_Os12g36440	0;0;0	Os12g0550800	expressed protein
LOC_Os12g36940	47.437	16.741	-1.517	0.0006367	Chr12	22648053	22648553	501	*	5.11	6.09	-0.14	6.23	2.91e-07	7.24e-06	Promoter (<=1kb)	4	22648120	22656270	8151	1	LOC_Os12g36940.1	0	LOC_Os12g36940.1	LOC_Os12g36940	0	Os12g0556500	calmodulin binding protein, putative, expressed
LOC_Os12g37110	91.407	19.448	-2.233	1.019e-11	Chr12	22736236	22736736	501	*	5.4	6.37	0.93	5.43	6.74e-09	5.03e-07	Distal Intergenic	4	22730840	22733722	2883	1	LOC_Os12g37110.1	5396	LOC_Os12g37110.1	LOC_Os12g37110	5396	Os12g0557900	OsFBD16 - F-box and FBD domain containing protein, expressed
LOC_Os12g37560	108.366	53.22	-1.025	0.0002694	Chr12	23048853	23049353	501	*	6.26	6.79	5.4	1.39	0.00186	0.0112	5' UTR	4	23048722	23053324	4603	1	LOC_Os12g37560.2	131	LOC_Os12g37560.1;LOC_Os12g37560.2	LOC_Os12g37560;LOC_Os12g37560	0;0	Os12g0562400	phospholipase C, putative, expressed
LOC_Os12g37630	561.391	361.25	-0.634	4.232e-08	Chr12	23102077	23102577	501	*	5.49	6.47	-0.14	6.61	2.66e-08	1.28e-06	Promoter (<=1kb)	4	23102020	23105182	3163	1	LOC_Os12g37630.2	57	LOC_Os12g37610.1;LOC_Os12g37620.1;LOC_Os12g37630.1;LOC_Os12g37630.2	LOC_Os12g37610;LOC_Os12g37620;LOC_Os12g37630;LOC_Os12g37630	-2710;1882;0;0	Os12g0563400	domain of unknown function family protein, expressed
LOC_Os12g37980	15.606	0.308	-5.577	0.0002094	Chr12	23344318	23344818	501	*	5.09	6.07	-0.14	6.21	7.44e-07	1.49e-05	Promoter (<=1kb)	4	23337900	23344845	6946	2	LOC_Os12g37980.1	27	LOC_Os12g37980.1	LOC_Os12g37980	0	Os12g0567500	protein kinase domain containing protein, expressed
LOC_Os12g37980	15.606	0.308	-5.577	0.0002094	Chr12	23341533	23342033	501	*	5.11	5.79	3.75	2.04	0.00522	0.025	Exon (LOC_Os12g37980.1/LOC_Os12g37980, exon 3 of 12)	4	23337900	23344845	6946	2	LOC_Os12g37980.1	2812	LOC_Os12g37980.1	LOC_Os12g37980	0	Os12g0567500	protein kinase domain containing protein, expressed
LOC_Os12g37980	15.606	0.308	-5.577	0.0002094	Chr12	23338472	23338972	501	*	5.99	6.63	4.79	1.83	0.000461	0.00363	Exon (LOC_Os12g37980.1/LOC_Os12g37980, exon 12 of 12)	4	23337900	23344845	6946	2	LOC_Os12g37980.1	5873	LOC_Os12g37980.1	LOC_Os12g37980	0	Os12g0567500	protein kinase domain containing protein, expressed
LOC_Os12g38100	51.465	10.268	-2.313	2.642e-07	Chr12	23399026	23399526	501	*	5.5	6.49	-0.14	6.63	1.98e-08	1.04e-06	Promoter (<=1kb)	4	23399038	23399863	826	1	LOC_Os12g38100.1	0	LOC_Os12g38100.1	LOC_Os12g38100	0	Os12g0568700	membrane associated DUF588 domain containing protein, putative, expressed
LOC_Os12g38400	74.406	16.679	-2.162	1.356e-09	Chr12	23560587	23561087	501	*	4.96	5.79	2.72	3.07	0.00416	0.021	Promoter (<=1kb)	4	23554928	23560551	5624	2	LOC_Os12g38400.2	-36	LOC_Os12g38400.2	LOC_Os12g38400	0	Os12g0572000	MYB family transcription factor, putative, expressed	OsMYB91	growth|salt|tolerance|abiotic stress| ABA |salt stress|stress|biotic stress|ABA|stress tolerance|plant growth	The R2R3-type MYB gene OsMYB91 has a function in coordinating plant growth and salt stress tolerance in rice.
LOC_Os12g38540	24.533	10.611	-1.205	0.04516	Chr12	23664064	23664564	501	*	5.15	6.08	1.91	4.17	1.23e-05	0.00016	Promoter (<=1kb)	4	23664188	23666614	2427	1	LOC_Os12g38540.1	0	LOC_Os12g38540.1	LOC_Os12g38540	0	None	expressed protein
LOC_Os12g38550	13.729	3.308	-2.058	0.0226	Chr12	23670008	23670508	501	*	6.19	6.91	4.69	2.22	1.76e-06	3.07e-05	Promoter (<=1kb)	4	23670116	23673048	2933	1	LOC_Os12g38550.1	0	LOC_Os12g38550.1	LOC_Os12g38550	0	Os12g0573800	expressed protein
LOC_Os12g38560	305.593	0.619	-8.973	8.192e-17	Chr12	23674307	23674807	501	*	5.48	6.44	1.54	4.9	1.25e-08	7.72e-07	Promoter (<=1kb)	4	23674529	23677395	2867	1	LOC_Os12g38560.1	0	LOC_Os12g38550.1;LOC_Os12g38560.1	LOC_Os12g38550;LOC_Os12g38560	0;0	Os12g0573900	expressed protein
LOC_Os12g38720	216.536	6.712	-5.022	5.544e-43	Chr12	23786825	23787325	501	*	5.1	6.04	1.56	4.48	1.25e-06	2.3e-05	Distal Intergenic	4	23782739	23783531	793	2	LOC_Os12g38720.1	-3294				Os12g0576100	expressed protein
LOC_Os12g40890	206.764	121.314	-0.772	3.483e-05	Chr12	25315504	25316004	501	*	4.8	5.77	-0.14	5.91	3.7e-06	5.71e-05	5' UTR	4	25310812	25316229	5418	2	LOC_Os12g40890.1	225	LOC_Os12g40890.1	LOC_Os12g40890	0	Os12g0601300	OsIAA30 - Auxin-responsive Aux/IAA gene family member, expressed
LOC_Os12g41110	37.618	18.219	-1.037	0.02786	Chr12	25462680	25463180	501	*	5.53	6.38	3.15	3.23	0.00229	0.0132	Promoter (<=1kb)	4	25462589	25463518	930	1	LOC_Os12g41110.1	91	LOC_Os12g41110.1;LOC_Os12g41120.1	LOC_Os12g41110;LOC_Os12g41120	0;0	Os12g0603800	OsCML5 - Calmodulin-related calcium sensor protein, expressed
LOC_Os12g41140	125.224	54.688	-1.188	1.481e-06	Chr12	25493434	25493934	501	*	5.7	6.2	4.92	1.28	0.0133	0.0499	Promoter (<=1kb)	4	25487498	25493744	6247	2	LOC_Os12g41140.3	0	LOC_Os12g41140.3;LOC_Os12g41140.2;LOC_Os12g41140.1	LOC_Os12g41140;LOC_Os12g41140;LOC_Os12g41140	0;0;0	Os12g0604200	expressed protein
LOC_Os12g44030	167.28	98.086	-0.772	0.0001759	Chr12	27310317	27310817	501	*	6	6.66	4.75	1.91	0.00236	0.0135	Exon (LOC_Os12g44030.1/LOC_Os12g44030, exon 1 of 1)	4	27309871	27311190	1320	2	LOC_Os12g44030.1	373	LOC_Os12g44030.1;LOC_Os12g44040.4;LOC_Os12g44040.3;LOC_Os12g44040.1;LOC_Os12g44040.2	LOC_Os12g44030;LOC_Os12g44040;LOC_Os12g44040;LOC_Os12g44040;LOC_Os12g44040	0;0;0;0;0	Os12g0637200	purple acid phosphatase precursor, putative, expressed
LOC_Os12g44050	5.966	0.309	-4.199	0.02799	Chr12	27316936	27317436	501	*	6.09	6.54	5.43	1.11	0.00791	0.0341	Promoter (<=1kb)	4	27316455	27317290	836	2	LOC_Os12g44050.1	0	LOC_Os12g44040.4;LOC_Os12g44040.3;LOC_Os12g44040.1;LOC_Os12g44040.2;LOC_Os12g44050.1	LOC_Os12g44040;LOC_Os12g44040;LOC_Os12g44040;LOC_Os12g44040;LOC_Os12g44050	0;0;0;0;0	Os12g0637400	purple acid phosphatase precursor, putative, expressed
