# Supplementary material for: Serine protease NAL1 exerts pleiotropic functions through degradation of TOPLESS-related corepressor in rice
Source: Research Square preprint supplement (doi:10.21203/rs.3.rs-1892822/v1), 2022-08-01
Supplement: Supplementary file 3 [file a06bb1e6dd955b8571a63270.xlsx]

## Sheet: Extended data Table 1
Extended data Table 1 Data collection, refinement and structural determination.
	NAL1
Wavelength (Å)	0.9792
Resolution range	48.6~2.6 (2.69~2.6)
Space group	C 2 2 21
Cell dimension
a, b, c (Å)	89.41, 194.40, 173.37
α, β, γ (o)	90.00, 90.00, 90.00
Total reflections	93,460 (9155)
Unique reflections	46,791 (4592)
Multiplicity	2.00 (2.00)
Completeness (%)	99.91 (99.67)
Mean I/sigma(I)	20.36 (2.86)
Wilson B-factor	66.54
R-merge (%)	20.0 (25.0)
R-meas (%)	30.0 (35.0)
R-pim (%)	21.28 (24.80)
CC1/2	0.999 (0.901)
CC*	1.00 (0.974)
Reflections used in refinement	46,779 (4590)
Reflections used for R-free	2,279 (244)
R-work (%)	22.38 (30.33)
R-free (%)	26.84 (34.31)
CC (work)	0.947 (0.844)
CC (free)	0.834 (0.714)
Number of non-hydrogen atoms	9030
macromolecules	8911
ligands	93
solvent	26
Protein residues	1156
RMS (bonds)	0.005
RMS (angles)	0.82
Ramachandran favored (%)	96.46
Ramachandran allowed (%)	3.54
Ramachandran outliers (%)	0
Rotamer outliers (%)	5.52
Clash score	9.07
Average B-factor	80.69
macromolecules	80.89
ligands	66.62
solvent	64.62
Number of TLS groups	1
Statistics for the highest-resolution shell are shown in parentheses.
