# Supplementary material for: Serine protease NAL1 exerts pleiotropic functions through degradation of TOPLESS-related corepressor in rice
Source: Research Square preprint supplement (doi:10.21203/rs.3.rs-1892822/v1), 2022-08-01
Supplement: Supplementary file 4 [file c6ddd5928ca56bbb62cea840.xlsx]

## Sheet: Extended data Table 2
Extended data Table 2 Homologous structure search for NAL1 by Dali.
Chain	Z	rmsd	lali	nres	%id	PDB Description
1sgp-E	17.7	2.2	172	185	20	STREPTOMYCES GRISEUS PROTEINASE B;
1p01-A	17	2.1	173	199	20	ALPHA-LYTIC PROTEASE;
5il9-A	11.8	2.6	152	465	16	PROTEASE DO-LIKE 9;
2r3y-A	11.4	3.7	158	280	18	PROTEASE DEGS;
3k6y-A	11.3	3.1	163	227	14	POSSIBLE MEMBRANE-ASSOCIATED SERINE PROTEASE;
7sjy-A	10.9	3	155	313	14	ANTI-SIGMA-I FACTOR RSGI9;
6z05-A	10.8	3.1	154	434	17	DEGQ FAMILY SERINE ENDOPROTEASE;
4ink-A	10.3	2.9	152	203	15	SERINE PROTEASE SPLD;
1agj-A	10.2	3.8	169	242	16	EPIDERMOLYTIC TOXIN A;
5to3-B	10	4	179	368	11	PROTHROMBIN;
2w5e-A	10	2.6	141	162	16	PUTATIVE SERINE PROTEASE;
3h7t-A	9.9	3.7	169	235	14	GROUP 3 ALLERGEN SMIPP-S YVT004A06;
2xwb-F	9.5	6.6	195	714	12	COMPLEMENT C3B BETA CHAIN;
1z8g-A	9.5	7.4	175	366	9	SERINE PROTEASE HEPSIN;
6l0t-B	9.5	3.4	159	206	13	3C PROTEASE;
4kkd-B	9.4	3.7	174	405	11	MANNAN-BINDING LECTIN SERINE PROTEASE 1;
2xrc-B	9.2	5.3	187	485	9	HUMAN COMPLEMENT FACTOR I;
5c2z-A	9.2	3.3	165	248	18	EXFOLIATIVE TOXIN D2;
2ijd-1	9.1	3.1	153	644	8	PICORNAIN 3C, RNA-DIRECTED RNA POLYMERASE;
3wy8-A	9	3.4	160	219	13	SERINE PROTEASE;
2wv4-B	9	3.9	159	196	11	PICORNAIN 3C;
3h5c-B	8.9	7.5	175	312	10	PROTEIN Z-DEPENDENT PROTEASE INHIBITOR;
5i25-A	8.9	7.1	176	596	11	COAGULATION FACTOR XI;
6ff0-A	8.8	3.9	152	195	14	SERINE PROTEASE DOMAIN FUSED WITH VPG DOMAIN;
5jwg-A	8.7	4.1	171	705	16	ASP/GLU-SPECIFIC DIPEPTIDYL-PEPTIDASE;
4a5t-S	8.2	4.2	183	767	13	PLASMINOGEN;
6bqm-A	8.1	3.4	164	460	12	SERINE PROTEASE VESC;
2b9l-A	7.8	4.4	175	372	11	PROPHENOLOXIDASE ACTIVATING FACTOR;
1lvm-A	7.8	3.3	146	229	12	CATALYTIC DOMAIN OF THE NUCLEAR INCLUSION
5y4l-B	7.8	3.5	137	203	14	NON-STRUCTURAL PROTEIN;
2xxl-B	7.7	4.7	175	354	13	GRAM-POSITIVE SPECIFIC SERINE PROTEASE, ISOFORM B
3ak5-A	7.6	3.6	156	970	12	HEMOGLOBIN-BINDING PROTEASE HBP;
5yvu-B	7.4	3.8	135	601	15	GENOME POLYPROTEIN;
2yy4-A	7	3.2	136	310	13	REPLICASE POLYPROTEIN 1AB;
1wxr-A	6.5	3.6	159	1035	12	HAEMOGLOBIN PROTEASE;
5lkl-A	6.3	3.4	129	704	11	GENOME POLYPROTEIN;
5lak-A	6	3.8	139	303	13	3CL PROTEASE;
1z8r-A	5	3.7	126	150	13	COXSACKIEVIRUS B4 POLYPROTEIN;
2m9p-A	4.5	4.4	141	240	15	SERINE PROTEASE SUBUNIT NS2B, SERINE PROTEASE NS3
1cu1-A	4.5	3.1	139	645	12	PROTEIN (PROTEASE/HELICASE NS3);
6ewz-A	2.9	4.8	72	202	10	GTP PYROPHOSPHOKINASE;
5vx6-A	2.9	8.6	100	209	8	UNCHARACTERIZED PROTEIN YPFA;
6wt8-A	2.8	10.6	91	356	7	STING-ASSOCIATED CDNE C-DI-GMP SYNTHASE;
6ea8-A	2.7	4.9	75	195	3	PROTEIN B2;
2be3-A	2.6	3.6	70	203	7	GTP PYROPHOSPHOKINASE;
6vda-A	2.4	3.2	60	86	7	ZT_DIMER DOMAIN-CONTAINING PROTEIN;
4qo6-A	2.3	9.9	65	209	5	ADENYLATE CYCLASE-LIKE PROTEIN;
