# Supplementary material for: Serine protease NAL1 exerts pleiotropic functions through degradation of TOPLESS-related corepressor in rice
Source: Research Square preprint supplement (doi:10.21203/rs.3.rs-1892822/v1), 2022-08-01
Supplement: Supplementary file 5 [file c74f898a3904e2944bd7f0f6.xlsx]

## Sheet: Extended data Table 3
Extended data Table 3 NAL1 interaction proteins identified by IP-MS.
Accession	Description	Score	Coverage	# Proteins	# Unique Peptides	# Peptides	# PSMs	# AAs	MW [kDa]	calc. pI
A0A0P0UYT9	Os01g0172400 protein (Fragment) OS=Oryza sativa subsp. japonica OX=39947 GN=Os01g0172400 PE=4 SV=1 - [A0A0P0UYT9_ORYSJ]	13.4176	12.42	4	3	3	4	451	51.5085	5.60498
Q0J7U6	Protein TPR2 OS=Oryza sativa subsp. japonica OX=39947 GN=TPR2 PE=1 SV=1 - [TPR2_ORYSJ]	12.9794	5.03	2	2	4	6	1133	124.699	7.28369
Q10NY2	Protein TPR3 OS=Oryza sativa subsp. japonica OX=39947 GN=TPR3 PE=1 SV=1 - [TPR3_ORYSJ]	7.50437	1.77	1	1	2	3	1133	125.127	7.13721
Q5NBT9	Protein TPR1 OS=Oryza sativa subsp. japonica OX=39947 GN=TPR1 PE=1 SV=1 - [TPR1_ORYSJ]	6.30712	3.99	1	3	4	4	1129	125.016	7.18115
Q6ZBZ2	Germin-like protein 8-14 OS=Oryza sativa subsp. japonica OX=39947 GN=GER5 PE=1 SV=1 - [GL814_ORYSJ]	3.23924	10.8	1	1	1	1	213	21.8472	6.50732
Q53QG2	40S ribosomal protein S25, putative, expressed OS=Oryza sativa subsp. japonica OX=39947 GN=LOC_Os11g05562 PE=2 SV=1 - [Q53QG2_ORYSJ]	3.10376	12.96	1	1	1	1	108	11.9116	10.4185
A0A0P0W604	Os04g0107900 protein (Fragment) OS=Oryza sativa subsp. japonica OX=39947 GN=Os04g0107900 PE=4 SV=1 - [A0A0P0W604_ORYSJ]	2.49608	4.02	5	1	1	1	249	27.9401	4.69092
P0C370	Cytochrome b559 subunit alpha OS=Oryza sativa subsp. japonica OX=39947 GN=psbE PE=3 SV=1 - [PSBE_ORYSJ]	2.48723	25.3	1	1	1	1	83	9.43871	4.77979
A0A0P0W0H3	Chlorophyll a-b binding protein, chloroplastic (Fragment) OS=Oryza sativa subsp. japonica OX=39947 GN=Os03g0592500 PE=3 SV=1 - [A0A0P0W0H3_ORYSJ]	2.23973	17.04	2	1	1	1	135	14.3543	4.95752
Q0DJB9	Os05g0303000 protein (Fragment) OS=Oryza sativa subsp. japonica OX=39947 GN=Os05g0303000 PE=3 SV=1 - [Q0DJB9_ORYSJ]	2.21922	2.61	1	1	1	1	459	48.619	4.729
Q9FYP0	Peroxidase OS=Oryza sativa subsp. japonica OX=39947 GN=prx11 PE=2 SV=1 - [Q9FYP0_ORYSJ]	2.21887	4.61	1	1	1	1	347	37.8893	6.93213
Q7XKB5	Pyruvate kinase carbohydrate metabolic process Os04g0677500 PE=2 SV=2 - [Q7XKB5_ORYSJ	2.09579	2.94	1	1	1	1	511	55.1909	7.91357
P0C358	Photosystem I P700 chlorophyll a apoprotein A2 OS=Oryza sativa subsp. japonica OX=39947 GN=psaB PE=3 SV=1 - [PSAB_ORYSJ]	2.04257	2.45	1	1	1	2	734	82.5079	7.15186
Q7XDI5	Os10g0470900 RNA recognition motif containing protein PE=4 SV=1 - [Q7XDI5_ORYSJ]	1.79687	3.45	1	1	1	1	464	45.593	6.7417
A0A0P0XAP0	Os07g0691800 protein (Fragment) OS=Oryza sativa subsp. japonica OX=39947 GN=Os07g0691800 PE=3 SV=1 - [A0A0P0XAP0_ORYSJ]	1.74365	4.9	3	1	1	1	245	27.4907	6.96143
A0A0P0XY45	Os11g0104900 protein OS=Oryza sativa subsp. japonica OX=39947 GN=Os11g0104900 PE=4 SV=1 - [A0A0P0XY45_ORYSJ]	1.71672	1.57	3	1	1	1	699	79.8562	4.97021
Q69UI8	Os08g0116500 protein OS=Oryza sativa subsp. japonica OX=39947 GN=Os08g0116500 PE=2 SV=1 - [Q69UI8_ORYSJ]	1.71203	10	1	1	1	1	110	11.0756	4.51318
Q6ZGL5	UTP--glucose-1-phosphate uridylyltransferase OS=Oryza sativa subsp. japonica OX=39947 GN=Os02g0117700 PE=2 SV=1 - [Q6ZGL5_ORYSJ]	1.70105	3.21	2	1	1	1	467	51.58	5.78271
A0A0P0YCC8	Os12g0623900 protein (Fragment) OS=Oryza sativa subsp. japonica OX=39947 GN=Os12g0623900 PE=4 SV=1 - [A0A0P0YCC8_ORYSJ]	1.6902	1.56	3	1	1	1	577	63.6208	5.92236
Q6K1Q6	Os02g0622300 protein OS=Oryza sativa subsp. japonica OX=39947 GN=OsRPL14 PE=2 SV=1 - [Q6K1Q6_ORYSJ]	1.64632	5.97	2	1	1	1	134	15.3776	10.2866
A0A0P0XE67	Os08g0320100 protein (Fragment) OS=Oryza sativa subsp. japonica OX=39947 GN=Os08g0320100 PE=4 SV=1 - [A0A0P0XE67_ORYSJ]	0	4.38	2	1	1	1	251	25.8843	9.23193
Q84QT9	Pyrophosphate--fructose 6-phosphate 1-phosphotransferase subunit alpha OS=Oryza sativa subsp. japonica OX=39947 GN=P0410E11.122 PE=2 SV=1 - [Q84QT9_ORYSJ]	0	1.78	2	1	1	1	617	67.1114	7.15186
Q76FS3	Tubulin beta-6 chain OS=Oryza sativa subsp. japonica OX=39947 GN=TUBB6 PE=2 SV=1 - [TBB6_ORYSJ]	0	3.6	3	1	1	1	444	49.8537	4.90674
Q7X6T8	Os07g0217600 protein OS=Oryza sativa subsp. japonica OX=39947 GN=OJ1080_F08.127 PE=2 SV=1 - [Q7X6T8_ORYSJ]	0	6.58	1	1	1	1	517	57.5116	7.47412
Q75HR0	Os05g0426900 protein OS=Oryza sativa subsp. japonica OX=39947 GN=Os05g0426900 PE=2 SV=1 - [Q75HR0_ORYSJ]	0	5.26	1	1	1	1	190	19.9169	9.21729
Q5JK65	Os01g0958200 protein OS=Oryza sativa subsp. japonica OX=39947 GN=Os01g0958200 PE=2 SV=1 - [Q5JK65_ORYSJ]	0	8.86	1	1	1	1	463	49.5823	7.97217
Q6ZF30	Chlorophyll a-b binding protein, chloroplastic OS=Oryza sativa subsp. japonica OX=39947 GN=Os07g0562700 PE=2 SV=1 - [Q6ZF30_ORYSJ]	0	3.76	1	1	1	1	266	28.7597	6.21436
A0A0P0XG77	Os08g0430500 protein (Fragment) OS=Oryza sativa subsp. japonica OX=39947 GN=Os08g0430500 PE=3 SV=1 - [A0A0P0XG77_ORYSJ]	0	4.46	8	1	1	1	224	24.9416	4.89404
A0A0P0X7C2	Beta-amylase OS=Oryza sativa subsp. japonica OX=39947 GN=Os07g0543100 PE=3 SV=1 - [A0A0P0X7C2_ORYSJ]	0	2.62	1	1	1	1	686	76.7745	7.10791
A0A0P0XIM9	Os09g0127800 protein (Fragment) OS=Oryza sativa subsp. japonica OX=39947 GN=Os09g0127800 PE=4 SV=1 - [A0A0P0XIM9_ORYSJ]	0	1.16	4	1	1	1	859	94.8074	5.92236
